# Supplementary material for: Evolution and Trends in Digital Wallet Research: A Bibliometric Analysis in Scopus and Web Of Science
Source: Preprints.org preprint supplement (doi:10.20944/preprints202408.1846.v1), 2024-08-27
Supplement: Supplementary file 1 [file Supplementary file S1.xlsx]

## Sheet: scopus_wos$df
AU	DE	ID	C1	JI	AB	RP	DI	SN	SO	LA	TC	PN	PU	DB	TI	DT	VL	PY	AF	J9	CR	AU_UN	AU1_UN	AU_UN_NR	SR_FULL	SR	AU_CO	ID_TOS	ref_type
SAIT M;ALI M;ALMUNAWAR M;HAJI M H	BRUNEI DARUSSALAM; DEVELOPING ECONOMY; DIGITAL WALLET; DISCONTINUANCE INTENTION; FINANCIAL TECHNOLOGY		SCHOOL OF BUSINESS AND ECONOMICS, UNIVERSITI BRUNEI DARUSSALAM, BANDAR SERI BEGAWAN, BRUNEI DARUSSALAM	J. SCI. TECHNOL. POLICY MANAGE.	PURPOSE: THIS EXPLORATORY STUDY AIMS TO INVESTIGATE AND IDENTIFY THE FACTORS INFLUENCING DISCONTINUANCE INTENTION AMONG PAST USERS OF LOCAL DIGITAL WALLETS IN BRUNEI DARUSSALAM. DESIGN/METHODOLOGY/APPROACH: THIS STUDY USES A MIXED-METHOD APPROACH THAT INTEGRATES QUANTITATIVE AND QUALITATIVE RESEARCH METHOD. AN ONLINE SURVEY IS DISTRIBUTED VIA WIDELY USED SOCIAL MEDIA PLATFORMS, USING PURPOSIVE SA…	M.A. SAIT; SCHOOL OF BUSINESS AND ECONOMICS, UNIVERSITI BRUNEI DARUSSALAM, BANDAR SERI BEGAWAN, BRUNEI DARUSSALAM; EMAIL: MUHAMMADAZMISAIT@GMAIL.COM	10.1108/JSTPM-01-2024-0005	20534620	JOURNAL OF SCIENCE AND TECHNOLOGY POLICY MANAGEMENT	ENGLISH	0		EMERALD PUBLISHING	ISI	UNDERSTANDING FACTORS TO DIGITAL WALLET DISCONTINUANCE INTENTION AMONG PAST USERS AN EXPLORATORY STUDY	ARTICLE		2024	SAIT MUHAMMAD AZMI;ALI MUHAMMAD ANSHARI;ALMUNAWAR MOHAMMAD NABIL;HAJI MASRI HAJI MASAIROL	J SCI TECHNOL POLICY MANAGE	none	UNIVERSITI BRUNEI DARUSSALAM	NOTREPORTED;UNIVERSITI BRUNEI DARUSSALAM;NOTREPORTED		SAIT MA, 2024, J SCI TECHNOL POLICY MANAGE	SAIT MA, 2024, J SCI TECHNOL POLICY MANAGE		SAIT MA, 2024,	wos
LEE Y;GAN C;LIEW T	IMPULSE BUYING; MOBILE PAYMENT; PERCEIVED ENJOYMENT; PERCEIVED INTERACTIVITY; PERCEIVED RISK; SATISFACTION; SUBJECTIVE NORM; VISUAL APPEAL		FACULTY OF BUSINESS, MULTIMEDIA UNIVERSITY, JALAN AYER KEROH LAMA, MELAKA, BUKIT BERUANG, 75450, MALAYSIA	J. MARKETING ANALYTICS	THIS STUDY INVESTIGATES THE FACTORS INFLUENCING GENERATION Y AND Z’S SATISFACTION AND PERCEIVED ENJOYMENT OF USING E-WALLET. THIS PAPER FURTHER ASSESSES WHETHER CONSUMERS PERCEIVED ENJOYMENT AND SATISFACTION WITH USING E-WALLET WOULD SIGNIFICANTLY AFFECT THEIR IMPULSIVE BUYING BEHAVIOR. PLS-SEM WAS CONDUCTED BASED ON 201 VALID RESPONSES FROM ACTIVE E-WALLET USERS COLLECTED THROUGH AN ONLINE SURVE…	C.L. GAN; FACULTY OF BUSINESS, MULTIMEDIA UNIVERSITY, BUKIT BERUANG, JALAN AYER KEROH LAMA, MELAKA, 75450, MALAYSIA; EMAIL: GAN.CHIN.LAY@MMU.EDU.MY	10.1057/s41270-022-00164-9	20503318	JOURNAL OF MARKETING ANALYTICS	ENGLISH	20	2	PALGRAVE MACMILLAN	ISI	DO EWALLETS TRIGGER IMPULSE PURCHASES AN ANALYSIS OF MALAYSIAN GENY AND GENZ CONSUMERS	ARTICLE	11	2023	LEE YI YONG;GAN CHIN LAY;LIEW TZE WEI	J MARKETING ANALYTICS	none	MULTIMEDIA UNIVERSITY	NOTREPORTED;MULTIMEDIA UNIVERSITY;NOTREPORTED		LEE YY, 2023, J MARKETING ANALYTICS	LEE YY, 2023, J MARKETING ANALYTICS	MALAYSIA	LEE YY, 2023,	wos
ALHALASEH R	FACTOR ANALYSIS; FINANCIAL KNOWLEDGE; FINANCIAL LITERACY; FINANCIAL PRACTICE; FINANCIAL SKILLS		BUSINESS SCHOOL, MUTAH UNIVERSITY, ALKARAK, JORDAN	J. GOVERN. REG.	THE PRESENT STUDY DEVELOPS A TOOL TO MEASURE FINANCIAL LITERACY IN THE ERA OF THE POST-COVID-19 PANDEMIC WHILE RECOGNIZING THE CHALLENGES AND CHANGES POSED BY THE PANDEMIC. INVESTIGATING AND VALIDATING IT IN THE ARAB CONTEXT THAT LACKED SUCH MEASUREMENT AND A DIRE NEED FOR FURTHER EXPLORATION. IT EMPLOYED NEW FINANCIAL CONCEPTS THAT EMERGED DURING AND POST-COVID-19 (E.G., E-WALLET, EMERGENCY FUND…		10.22495/jgrv13i1siart10	22209352	JOURNAL OF GOVERNANCE AND REGULATION	ENGLISH	0	1	VIRTUS INTERPRESS	ISI	DEVELOPING A FINANCIAL LITERACY SCALE FOR ARAB CONTEXT A CASE OF UNIVERSITY STUDENTS	ARTICLE	13	2024	ALHALASEH RULA HANI	J GOVERN REG	none	MUTAH UNIVERSITY	MUTAH UNIVERSITY		ALHALASEH RH, 2024, J GOVERN REG	ALHALASEH RH, 2024, J GOVERN REG	JORDAN	ALHALASEH RH, 2024,	wos
AMRIENA G;RAMAYANTI R	BRIMO; CASHLESS; MOBILE BANKING; TECHNOLOGY ACCEPTANCE MODEL (TAM)		TRILOGI UNIVERSITY, JAKARTA, INDONESIA	CONTRIB. MANAG. SCI.	AS A RESULT OF THE PANDEMIC, THE WAY OF LIFE IN INDONESIA HAS CHANGED TO INCLUDE ALWAYS DONNING A MASK WHEN TRAVELING, ALWAYS USING HAND SANITIZER, REDUCING OUTDOOR ACTIVITIES, AND AVOIDING MOBILITY. PAYMENT METHODS FOR TRANSACTIONS HAVE ALSO CHANGED, SUCH AS CASH, WHEN PEOPLE WANT TO SELL OR BUY GOODS. DUE TO THE PANDEMIC, PEOPLE ARE ASKED TO USE NON-CASH PAYMENT METHODS SUCH AS E-WALLET PAYMENT…	R. RAMAYANTI; TRILOGI UNIVERSITY, JAKARTA, INDONESIA; EMAIL: RIZKA.RAMAYANTI@UNIVERSITAS-TRILOGI.AC.ID	10.1007/978-3-031-48770-5_61	14311941	CONTRIBUTIONS TO MANAGEMENT SCIENCE	ENGLISH	0		SPRINGER SCIENCE AND BUSINESS MEDIA DEUTSCHLAND GMBH	ISI	CONSUMER ADOPTION OF BRIMO MOBILE BANKING APPLICATION AN EXTENDED TAM PERSPECTIVE	BOOK CHAPTER	PART F2529	2024	AMRIENA GITA;RAMAYANTI RIZKA	CONTRIB MANAG SCI	none	TRILOGI UNIVERSITY	NOTREPORTED;TRILOGI UNIVERSITY;EMAIL: RIZKA.RAMAYANTI@UNIVERSITAS-TRILOGI.AC.ID		AMRIENA G, 2024, CONTRIB MANAG SCI	AMRIENA G, 2024, CONTRIB MANAG SCI	INDONESIA	AMRIENA G, 2024,	wos
MOTHOBI O;KEBOTSAMANG K	DIGITAL FINANCE; DIGITAL TECHNOLOGIES; FINANCIAL INCLUSION		UNIVERSITY OF THE WITWATERSRAND, TAYARISHA, WITS SCHOOL OF GOVERNANCE, 2 ST DAVID’S PLACE, DONALD GORDON BUILDING, PARKTOWN, JOHANNESBURG, SOUTH AFRICA; UNIVERSITY OF BOTSWANA, GABORONE, PLOT 4775 NOTWANE RD, BOTSWANA	J. ECON. STRUCT.	DIGITAL FINANCE PLAYS A MAJOR ROLE IN IMPROVING ACCESS TO, USAGE AND QUALITY OF FINANCIAL SERVICES IN DEVELOPING COUNTRIES. THE USE OF THESE PLATFORMS HAS BEEN ASSOCIATED WITH A POSITIVE IMPACT ON ECONOMIC GROWTH AND PEOPLE’S WELFARE. THEY ALLOW FOR CONVENIENT, SECURE, AND EFFICIENT TRANSACTION AND ARE THE CRUCIAL ELEMENT OF E-COMMERCE. IN THIS PAPER, WE ANALYSE THE EFFECT OF MOBILE NETWORK COVER…	O. MOTHOBI; UNIVERSITY OF BOTSWANA, GABORONE, PLOT 4775 NOTWANE RD, BOTSWANA; EMAIL: MTHONK003@GMAIL.COM	10.1186/s40008-023-00326-7	21932409	JOURNAL OF ECONOMIC STRUCTURES	ENGLISH	0	1	SPRINGER SCIENCE AND BUSINESS MEDIA DEUTSCHLAND GMBH	ISI	THE IMPACT OF NETWORK COVERAGE ON ADOPTION OF FINTECH AND FINANCIAL INCLUSION IN SUBSAHARAN AFRICA	ARTICLE	13	2024	MOTHOBI ONKOKAME;KEBOTSAMANG KAGO	J ECON STRUCT	none	UNIVERSITY OF THE WITWATERSRAND;UNIVERSITY OF BOTSWANA	NOTREPORTED;UNIVERSITY OF BOTSWANA;NOTREPORTED		MOTHOBI O, 2024, J ECON STRUCT	MOTHOBI O, 2024, J ECON STRUCT	BOTSWANA	MOTHOBI O, 2024,	wos
FRIDELL T;VANGEN G;MINCER-DASZKIEWICZ J;NORDER J;RAUTIO K;DRVODELIĆ I;BACHARACH G	DC<SUB>4</SUB>EU; ELMO; EMREX; EUDI WALLET; INTEROPERABILITY; STUDENT MOBILITY	ELECTRONIC DOCUMENT IDENTIFICATION SYSTEMS; GATEWAYS (COMPUTER NETWORKS); INTEROPERABILITY; DATA STANDARDS; DC4EU; DIGITAL IDENTITY; ELMO; EMREX; EUROPEAN DIGITAL IDENTITY WALLET WALLET; SERVICES NETWORK; STRATEGIC GOALS; STUDENT ACHIEVEMENT; STUDENT MOBILITIES; STUDENTS	THE LADOK CONSORTIUM, SWEDEN; SIKT – NORWEGIAN AGENCY FOR SHARED SERVICES IN EDUCATION AND RESEARCH, NORWAY; UNIVERSITY OF WARSAW, POLAND; DUO, DIENST UITVOERING ONDERWIJS, NETHERLANDS; CSC – IT CENTER FOR SCIENCE LTD, FINLAND; AZVO – AGENCY FOR SCIENCE AND HIGHER EDUCATION, CROATIA; EMREX EXECUTIVE COMMITTEE, GERMANY	EPIC SRE. COMP.	EMREX IS A SOLUTION FOR TRANSFERRING STUDENT DATA INTERNATIONALLY IN A MACHINEREADABLE WAY AND IN A STRUCTURED FORMAT. THE EMREX SERVICE NETWORK HAS BEEN IN PRODUCTION SINCE 2017. ELMO IS THE DATA STANDARD USED IN THE EMREX NETWORK TO DESCRIBE STUDENT ACHIEVEMENTS AND SUPPORTING DATA. ONE OF THE STRATEGIC GOALS ESTABLISHED FOR EMREX IN 2022 BY THE EXECUTIVE COMMITTEE OF THE EMREX USER GROUP WAS T…		10.29007/t3lp	23987340	EPIC SERIES IN COMPUTING	ENGLISH	0		EASYCHAIR	ISI	THE FUTURE IS IN YOUR WALLET HOW EMREX PLANS INTERACTION WITH THE EUDI WALLET	CONFERENCE PAPER	95	2023	FRIDELL TOR;VANGEN GEIR;MINCER-DASZKIEWICZ JANINA;NORDER JAN-JOOST;RAUTIO KIMMO;DRVODELIĆ IGOR;BACHARACH GUIDO	EPIC SRE COMP	none	THE LADOK CONSORTIUM;SIKT – NORWEGIAN AGENCY FOR SHARED SERVICES IN EDUCATION AND RESEARCH;UNIVERSITY OF WARSAW;CSC – IT CENTER FOR SCIENCE LTD;AZVO – AGENCY FOR SCIENCE AND HIGHER EDUCATION	THE LADOK CONSORTIUM;SIKT – NORWEGIAN AGENCY FOR SHARED SERVICES IN EDUCATION AND RESEARCH;UNIVERSITY OF WARSAW;NOTREPORTED;CSC – IT CENTER FOR SCIENCE LTD;AZVO – AGENCY FOR SCIENCE AND HIGHER EDUCATION;NOTREPORTED		FRIDELL T, 2023, EPIC SRE COMP	FRIDELL T, 2023, EPIC SRE COMP	GERMANY	FRIDELL T, 2023,	wos
CHAND K;JANGRA S;SINGH P;TIWARI R;TIWARI R			RAFFLES UNIVERSITY, INDIA; INSTITUTE OF MANAGEMENT STUDIES AND RESEARCH, MAHARSHI DAYANAND UNIVERSITY, INDIA; ALABBAR SCHOOL OF MANAGEMENT, RAFFLES UNIVERSITY, INDIA; SRM INSTITUTE OF SCIENCE AND TECHNOLOGY, INDIA; GRAPHIC ERA UNIVERSITY (DEEMED), INDIA	DATA-DRIVEN APPROACHES FOR EFF. MANAGERIAL DECISION MAKING	THE PRESENT CHAPTER EXPLORES THE SUSTAINABILITY OF MOBILE PAYMENT WALLETS AMID LOWCOST DATA USAGE. TO EVALUATE SUSTAINABILITY, THE CHAPTER EVALUATES THE ASSOCIATION BETWEEN PERCEPTION AND SATISFACTION OF M-WALLET. THE CHAPTER EXAMINES 506 M-WALLET USERS' PERCEPTION AND SATISFACTION. A SELF-ADMINISTRATED QUESTIONNAIRE WAS USED TO COLLECT RESPONSES USING AN ONLINE SURVEY. FIVE FACTORS WERE EXTRACTE…		10.4018/978-1-6684-7568-3.ch005		DATA-DRIVEN APPROACHES FOR EFFECTIVE MANAGERIAL DECISION MAKING	ENGLISH	6		IGI GLOBAL	ISI	SUSTAINABILITY OF MOBILE WALLETS IN THE ERA OF LOW COST DATA USAGE IN INDIA	BOOK CHAPTER		2023	CHAND KHEM;JANGRA SAPNA;SINGH PRAVIN CHANDRA;TIWARI RAVI SHEKHAR;TIWARI RAJESH	DATA-DRIVEN APPROACHES FOR EFF MANAGERIAL DECISION MAKING	none	RAFFLES UNIVERSITY;MAHARSHI DAYANAND UNIVERSITY;RAFFLES UNIVERSITY;SRM INSTITUTE OF SCIENCE AND TECHNOLOGY;GRAPHIC ERA UNIVERSITY (DEEMED)	RAFFLES UNIVERSITY;MAHARSHI DAYANAND UNIVERSITY;RAFFLES UNIVERSITY;SRM INSTITUTE OF SCIENCE AND TECHNOLOGY;GRAPHIC ERA UNIVERSITY (DEEMED)		CHAND K, 2023, DATA-DRIVEN APPROACHES FOR EFF MANAGERIAL DECISION MAKING	CHAND K, 2023, DATA-DRIVEN APPROACHES FOR EFF MANAGERIAL DECISION MAKING	INDIA	CHAND K, 2023,	wos
LUKKIEN B;BHAROSA N;DE R M	BARRIERS; DIGITAL IDENTITY WALLET; PERSONAL DATA MANAGEMENT; PUBLIC-PRIVATE COLLABORATION	DATA PRIVACY; DECISION MAKING; ECOSYSTEMS; ELECTRONIC DOCUMENT IDENTIFICATION SYSTEMS; ACADEMIC LITERATURE; BARRIER; DIGITAL IDENTITY; DIGITAL IDENTITY WALLET; DIGITAL WALLETS; PERSONAL DATA MANAGEMENT; POLICY MAKERS; PUBLIC-PRIVATE; PUBLIC-PRIVATE COLLABORATION; REGULATIONS AND POLICY; INFORMATION MANAGEMENT	DELFT UNIVERSITY OF TECHNOLOGY, NETHERLANDS	ACM INT. CONF. PROC. SER.	ACROSS THE EUROPEAN CONTINENT, GOVERNMENTS AND GOVTECH COMPANIES ARE RUSHING TO LAUNCH DIGITAL IDENTITY WALLETS FOR CITIZENS. THESE WALLETS SHOULD ALLOW CITIZENS TO OBTAIN A HIGHER LEVEL OF CONTROL OVER THEIR PERSONAL DATA. WHILE THERE ARE SOME REGULATIONS AND POLICY DIRECTIONS, ACTORS ARE STRUGGLING WITH THE DESIGN, LAUNCH, AND GOVERNANCE OF THESE DIGITAL WALLETS. THOSE LOOKING FOR HELP WILL FIN…		10.1145/3598469.3598501		ACM INTERNATIONAL CONFERENCE PROCEEDING SERIES	ENGLISH	1		ASSOCIATION FOR COMPUTING MACHINERY	ISI	BARRIERS FOR DEVELOPING AND LAUNCHING DIGITAL IDENTITY WALLETS	CONFERENCE PAPER		2023	LUKKIEN BERT;BHAROSA NITESH;DE REUVER MARK	ACM INT CONF PROC SER	none	DELFT UNIVERSITY OF TECHNOLOGY	DELFT UNIVERSITY OF TECHNOLOGY		LUKKIEN B, 2023, ACM INT CONF PROC SER	LUKKIEN B, 2023, ACM INT CONF PROC SER	NETHERLANDS	LUKKIEN B, 2023,	wos
JOSHI H;CHAWLA D	FIMIX-PLS; INDIA; MOBILE WALLET; PLS-SEM; SEGMENTATION; TAM		INTERNATIONAL MANAGEMENT INSTITUTE, DELHI, NEW DELHI, INDIA	INT. J. BANK MARK.	PURPOSE: THE PURPOSE OF THIS STUDY IS TO SEGMENT MOBILE WALLET USERS USING A FINITE MIXTURE PARTIAL LEAST SQUARES (FIMIX-PLS) APPROACH AND EVALUATE THE UNOBSERVED HETEROGENEITY ACROSS SEGMENTS. DESIGN/METHODOLOGY/APPROACH: PARTIAL LEAST SQUARE STRUCTURAL EQUATION MODELING (PLS-SEM) USING A CONVENIENCE SAMPLE OF 744 RESPONSES WAS USED TO ANALYZE THE MEASUREMENT, STRUCTURAL MODEL AND HYPOTHESES TES…	H. JOSHI; INTERNATIONAL MANAGEMENT INSTITUTE, NEW DELHI, DELHI, INDIA; EMAIL: HIMANSHU@IMI.EDU	10.1108/IJBM-03-2022-0132	02652323	INTERNATIONAL JOURNAL OF BANK MARKETING	ENGLISH	5	1	EMERALD PUBLISHING	ISI	IDENTIFYING UNOBSERVED HETEROGENEITY IN MOBILE WALLET ADOPTION A FIMIXPLS APPROACH FOR USER SEGMENTATION	ARTICLE	41	2023	JOSHI HIMANSHU;CHAWLA DEEPAK	INT J BANK MARK	none	INTERNATIONAL MANAGEMENT INSTITUTE	NOTREPORTED;INTERNATIONAL MANAGEMENT INSTITUTE;NOTREPORTED		JOSHI H, 2023, INT J BANK MARK	JOSHI H, 2023, INT J BANK MARK	INDIA	JOSHI H, 2023,	wos
LIBAQUE-SAENZ C;ORTEGA C;RODRIGUEZ-SERRA M;CHONG M;LOPEZ-PUENTE-DE-LA-VEGA S	E-WALLETS; INTER-SIDE BENEFITS; INTEROPERABILITY; MERCHANT ADOPTION; TWO-SIDED MARKETS	COMMERCE; INVESTMENTS; SALES; CO-EXISTENCE; DESIGN/METHODOLOGY/APPROACH; E-WALLET; ECONOMIC AGENTS; INTER-SIDE BENEFIT; LOW PENETRATION RATES; MERCHANT ADOPTION; PERCEIVED BENEFITS; SOCIAL COGNITIVE THEORY; TWO-SIDED MARKETS; INTEROPERABILITY	DEPARTMENT OF ENGINEERING, UNIVERSIDAD DEL PACIFICO, LIMA, PERU; DEPARTMENT OF ENGINEERING, RESEARCH AFFILIATE AT THE CENTER FOR CHINA AND ASIA PACIFIC STUDIES, UNIVERSIDAD DEL PACIFICO, LIMA, PERU; DEPARTMENT OF BUSINESS MANAGEMENT, UNIVERSIDAD DEL PACIFICO, LIMA, PERU	IND MANAGE DATA SYS	PURPOSE: ALTHOUGH E-WALLET ADOPTION HAS GROWN IN RECENT YEARS, THERE ARE SOME COUNTRIES LIKE PERU WITH LOW PENETRATION RATES. CONTRARY TO PRIOR STUDIES THAT FOCUSED ON CUSTOMERS' ADOPTION OF E-WALLETS, THIS STUDY FOCUSES ON MERCHANTS' ADOPTION TO FULLY UNDERSTAND THE USE OF THESE SERVICES. ADDITIONALLY, CONSIDERING THAT E-WALLETS ARE TWO-SIDED MARKETS WITH THE CO-EXISTENCE OF TWO DISTINCT ECONOMI…	C.F. LIBAQUE-SAENZ; DEPARTMENT OF ENGINEERING, RESEARCH AFFILIATE AT THE CENTER FOR CHINA AND ASIA PACIFIC STUDIES, UNIVERSIDAD DEL PACIFICO, LIMA, PERU; EMAIL: CF.LIBAQUES@UP.EDU.PE	10.1108/IMDS-04-2023-0238	02635577	INDUSTRIAL MANAGEMENT AND DATA SYSTEMS	ENGLISH	1	1	EMERALD PUBLISHING	ISI	THE ROLE OF INTEROPERABILITY ANDINTERSIDE BENEFITS ON MERCHANTS EWALLET ADOPTION THECASE OF PERUVIAN NANOSTORES	ARTICLE	124	2024	LIBAQUE-SAENZ CHRISTIAN FERNANDO;ORTEGA CLAUDIO;RODRIGUEZ-SERRA MICHELLE;CHONG MARIO;LOPEZ-PUENTE-DE-LA-VEGA SALVADOR	IND MANAGE DATA SYS	none	UNIVERSIDAD DEL PACIFICO;UNIVERSIDAD DEL PACIFICO;UNIVERSIDAD DEL PACIFICO	NOTREPORTED;UNIVERSIDAD DEL PACIFICO;NOTREPORTED		LIBAQUE-SAENZ CF, 2024, IND MANAGE DATA SYS	LIBAQUE-SAENZ CF, 2024, IND MANAGE DATA SYS	PERU	LIBAQUE-SAENZ CF, 2024,	wos
HAMZAH M;RAMLI F;SHAW N	BRAND IMAGE; MOBILE PAYMENT; QR-CODE E-WALLET; TECHNOLOGY ADOPTION; UTAUT2	KLANG VALLEY; MALAYSIA; WEST MALAYSIA; ADAPTIVE MANAGEMENT; CONSUMPTION BEHAVIOR; EMPIRICAL ANALYSIS; PERCEPTION; TECHNOLOGY ADOPTION	FACULTY OF BUSINESS AND MANAGEMENT, UNIVERSITI TEKNOLOGI MARA, CAWANGAN SELANGOR, KAMPUS PUNCAK ALAM, MALAYSIA; FACULTY OF BUSINESS AND MANAGEMENT, UNIVERSITI TEKNOLOGI MARA, CAWANGAN KELANTAN, KAMPUS MACHANG, MALAYSIA; TED ROGERS SCHOOL OF MANAGEMENT, TORONTO METROPOLITAN UNIVERSITY, 55 DUNDAS STREET WEST, TORONTO, M5G 2C3, ON, CANADA	J. RETAIL. CONSUM. SERV.	IN A POST-PANDEMIC ERA MARKED BY THRIVING DIGITAL PAYMENTS AND E-COMMERCE TRANSACTIONS DUE TO PHYSICAL DISTANCING NORMS, THE GROWTH OF MOBILE PAYMENTS OR E-WALLETS IS EXPECTED TO EXPAND IN TANDEM WITH THE GLOBAL TREND TOWARD CASHLESS PAYMENT SOLUTIONS. HOWEVER, IT IS UNCLEAR WHETHER THIS MOMENTUM WOULD BE SUSTAINED FOR OVER-THE-COUNTER (OTC) RETAIL PAYMENTS, PARTICULARLY QR-CODE E-WALLETS, THAT A…	M.I. HAMZAH; FACULTY OF BUSINESS AND MANAGEMENT, UNIVERSITI TEKNOLOGI MARA, CAWANGAN SELANGOR, KAMPUS PUNCAK ALAM, MALAYSIA; EMAIL: ISKANDARH@UITM.EDU.MY	10.1016/j.jretconser.2023.103326	09696989	JOURNAL OF RETAILING AND CONSUMER SERVICES	ENGLISH	15		ELSEVIER LTD	ISI	THE MODERATING INFLUENCE OF BRAND IMAGE ON CONSUMERS ADOPTION OF QRCODE EWALLETS	ARTICLE	73	2023	HAMZAH MUHAMMAD ISKANDAR;RAMLI FATEN AISYAH AHMAD;SHAW NORMAN	J RETAIL CONSUM SERV	none	UNIVERSITI TEKNOLOGI MARA;UNIVERSITI TEKNOLOGI MARA;TORONTO METROPOLITAN UNIVERSITY	NOTREPORTED;UNIVERSITI TEKNOLOGI MARA;NOTREPORTED		HAMZAH MI, 2023, J RETAIL CONSUM SERV	HAMZAH MI, 2023, J RETAIL CONSUM SERV	CANADA	HAMZAH MI, 2023,	wos
TAHERDOOST H			UNIVERSITY CANADA WEST, CANADA AND HAMTA GROUP-HAMTA BUSINESS CORPORATION, CANADA	MAINST. CRYPTOCURRENCY AND THE FUTURE OF DIG. FINANCE	MONEY IS NO LONGER LIMITED TO PHYSICAL CURRENCY OR CREDIT AND DEBIT CARDS; HOWEVER, CRYPTOCURRENCIES ARE EMERGING DUE TO RECENT TECHNOLOGICAL ADVANCEMENTS. FINANCIAL MARKETS HAVE BEEN REVOLUTIONIZED AS A RESULT OF INNOVATIVE TECHNOLOGICAL TRENDS. IT SEEMS THAT THERE IS NO WAY TO EVADE EMBRACING NEW TRENDS IN THE FINANCIAL MARKETS; WITHOUT THEM, WE WILL BE DESTINED TO FAIL. MAINSTREAMING CRYPTOCUR…		10.4018/978-1-6684-8368-8		MAINSTREAMING CRYPTOCURRENCY AND THE FUTURE OF DIGITAL FINANCE	ENGLISH	0		IGI GLOBAL	ISI	MAINSTREAMING CRYPTOCURRENCY AND THE FUTURE OF DIGITAL FINANCE	BOOK		2023	TAHERDOOST HAMED	MAINST CRYPTOCURRENCY AND THE FUTURE OF DIG FINANCE	none	UNIVERSITY CANADA WEST	UNIVERSITY CANADA WEST		TAHERDOOST H, 2023, MAINST CRYPTOCURRENCY AND THE FUTURE OF DIG FINANCE	TAHERDOOST H, 2023, MAINST CRYPTOCURRENCY AND THE FUTURE OF DIG FINANCE	CANADA	TAHERDOOST H, 2023,	wos
MEHRA P;SINGH A	BEHAVIORAL INTENTION; BISEXUAL AND TRANSGENDE; CONTINUOUS INTENTION; DIGITAL PAYMENTS; GAY; LESBIAN; MOBILE WALLET; STIMULUS-ORGANISM-RESPONSE		LOVELY PROFESSIONAL UNIVERSITY, PHAGWARA, PUNJAB, INDIA	DIGIT. INFLU. ON CONSUM. HABITS: MARK. CHALLENGES AND OPPOR.	ONE OF THE MOST MARGINALIZED COMMUNITIES IN INDIA IS THE LESBIAN, GAY, BISEXUAL AND TRANSGENDER (LGBT) COMMUNITY WHICH COMMONLY EXPERI¬ENCES DISCRIMINATION. MANY STUDIES HAVE COUNTERED THAT THE LGBT COM¬MUNITY FACES HIGH DISCRIMINATION IN THE BANKING AND FINANCING INDUSTRY. AS A RESULT, THIS STUDY CONCENTRATES ON THIS MARGINALIZED COMMUNITY AND ITS ACCEPTANCE AND CONTINUATION HABIT REGARDING MOBI…		10.1108/978-1-80455-342-820241006		DIGITAL INFLUENCE ON CONSUMER HABITS: MARKETING CHALLENGES AND OPPORTUNITIES	ENGLISH	0		EMERALD PUBLISHING	ISI	UNDERSTANDING ACCEPTANCE AND CONTINUOUS INTENTION OF MOBILE WALLET BY LGBT COMMUNITY USING SOR MODEL	BOOK CHAPTER		2024	MEHRA PREETI;SINGH AAYUSHI	DIGIT INFLU ON CONSUM HABITS: MARK CHALLENGES AND OPPOR	none	LOVELY PROFESSIONAL UNIVERSITY	LOVELY PROFESSIONAL UNIVERSITY		MEHRA P, 2024, DIGIT INFLU ON CONSUM HABITS: MARK CHALLENGES AND OPPOR	MEHRA P, 2024, DIGIT INFLU ON CONSUM HABITS: MARK CHALLENGES AND OPPOR	INDIA	MEHRA P, 2024,	wos
BHAMBRI P			GURU NANAK DEV ENGINEERING COLLEGE, LUDHIANA, INDIA	DECENTRALIZING THE ONLINE EXP. WITH WEB3 TECHNOL.	DIGITAL WALLETS ARE OF UTMOST IMPORTANCE IN TRANSFORMING THE ONLINE EXPERIENCE AS THEY SERVE AS THE CORE CONSTITUENTS OF DECENTRALIZED ECOSYSTEMS. THIS STUDY EXPLORES THE OPERATIONAL MECHANISMS OF DIFFERENT TYPES OF WALLETS, ENCOMPASSING HARDWARE WALLETS AND SOFTWARE-BASED SOLUTIONS, IN ORDER TO ELUCIDATE THEIR DISTINCTIVE CHARACTERISTICS AND SECURITY IMPLICATIONS. MOREOVER, THE CHAPTER OFFERS A …		10.4018/979-8-3693-1532-3.ch004		DECENTRALIZING THE ONLINE EXPERIENCE WITH WEB3 TECHNOLOGIES	ENGLISH	1		IGI GLOBAL	ISI	WALLETS AND TRANSACTIONS	BOOK CHAPTER		2024	BHAMBRI PANKAJ	DECENTRALIZING THE ONLINE EXP WITH WEB3 TECHNOL	none	GURU NANAK DEV ENGINEERING COLLEGE	GURU NANAK DEV ENGINEERING COLLEGE		BHAMBRI P, 2024, DECENTRALIZING THE ONLINE EXP WITH WEB3 TECHNOL	BHAMBRI P, 2024, DECENTRALIZING THE ONLINE EXP WITH WEB3 TECHNOL	INDIA	BHAMBRI P, 2024,	wos
FAIOLI M	BLOCKCHAIN; DIGITAL SERVICES; LABOUR MARKET ACTIVATION POLICIES; NEXT GENERATION EU		UNIVERSITÀ CATTOLICA DEL SACRO CUORE DI MILANO, DIPARTIMENTO DI DIRITTO PRIVATO E PUBBLICO DELL’ECONOMIA, LARGO A. GEMELLI, MILANO, 1 20123, ITALY	LAV. DIRIT.	THE ESSAY IS AIMED AT INVESTIGATING THE LEGAL PROBLEM ARISING FROM THE USE OF DIGITAL JOBS PLATFORMS, EVEN IN THE FORM OF SOCIAL BLOCKCHAIN AND ARTIFICIAL INTELLIGENCE SYSTEMS, THAT COULD DEAL WITH LABOUR MARKET MATCHING AND THE ITALIAN PUBLIC/PRIVATE EMPLOYMENT SERVICES. INEFFICIENCIES AND STRUCTURAL SHORTCOMINGS RELATED TO THE ITALIAN INSTITUTIONS DEALING WITH THE POLICIES OF LABOUR MARKET MATC…	M. FAIOLI; UNIVERSITÀ CATTOLICA DEL SACRO CUORE DI MILANO, DIPARTIMENTO DI DIRITTO PRIVATO E PUBBLICO DELL’ECONOMIA, MILANO, LARGO A. GEMELLI, 1 20123, ITALY; EMAIL: CHELE.FAIOLI@UNICATT.IT	10.1441/107494	1120947X	LAVORO E DIRITTO	ITALIAN	1	2	SOCIETA EDITRICE IL MULINO	ISI	MATCHMAKING ADVANCED TECHNOLOGY RULES AND THE LABOUR MARKET MATCHMAKING TECNOLOGIA AVANZATA REGOLE E MERCATO DEL LAVORO	ARTICLE		2023	FAIOLI MICHELE	LAV DIRIT	none	UNIVERSITÀ CATTOLICA DEL SACRO CUORE DI MILANO	NOTREPORTED;UNIVERSITÀ CATTOLICA DEL SACRO CUORE DI MILANO;NOTREPORTED		FAIOLI M, 2023, LAV DIRIT	FAIOLI M, 2023, LAV DIRIT	ITALY	FAIOLI M, 2023,	wos
KAPOOR A;SINDWANI R;GOEL M	BARRIERS; BEST WORST METHOD; BWM; INHIBITORS; MOBILE WALLET; PRIORITISATION; SYSTEMATIC LITERATURE REVIEW		J.C. BOSE UNIVERSITY OF SCIENCE AND TECHNOLOGY, YMCA, FARIDABAD, INDIA	INT. J. BUS. EXCELLENCE	THE PURPOSE OF THIS STUDY IS TO PROPOSE A NOVEL MULTI-CRITERION APPROACH FOR ASSESSMENT OF INHIBITORS TO MOBILE WALLET (M-WALLET) ADOPTION AMONG CONSUMERS. NINE BARRIERS TO M-WALLET ADOPTION ARE EXPLORED THROUGH SYSTEMATIC REVIEW OF LITERATURE AND DISCUSSION WITH EXPERT. A RELATIVELY NEW AND EFFICACIOUS MULTI CRITERION DECISION MAKING APPROACH NAMED BEST WORST METHOD (BWM) HAS BEEN PROPOSED TO PR…	R. SINDWANI; J.C. BOSE UNIVERSITY OF SCIENCE AND TECHNOLOGY, YMCA, FARIDABAD, INDIA; EMAIL: RAJIV_SINDWANI@YAHOO.CO.IN	10.1504/IJBEX.2024.137567	17560047	INTERNATIONAL JOURNAL OF BUSINESS EXCELLENCE	ENGLISH	1	4	INDERSCIENCE PUBLISHERS	ISI	ASSESSING INHIBITORS TO ADOPTION OF MWALLET A BWM APPROACH	ARTICLE	32	2024	KAPOOR ASHWARYA;SINDWANI RAJIV;GOEL MANISHA	INT J BUS EXCELLENCE	none	J.C. BOSE UNIVERSITY OF SCIENCE AND TECHNOLOGY	NOTREPORTED;J.C. BOSE UNIVERSITY OF SCIENCE AND TECHNOLOGY;NOTREPORTED		KAPOOR A, 2024, INT J BUS EXCELLENCE	KAPOOR A, 2024, INT J BUS EXCELLENCE	INDIA	KAPOOR A, 2024,	wos
HASHIM N;CHAN T;LI P	DIFFUSION OF INNOVATION; E-WALLETS; PERSONAL INNOVATIVENESS; SELF-EFFICACY; UNIFIED THEORY OF ACCEPTANCE AND; USE BEHAVIOR; USE OF TECHNOLOGY 2		DEPARTMENT OF MANAGEMENT & MARKETING, FACULTY OF BUSINESS AND ECONOMICS, UNIVERSITI MALAYA, KUALA LUMPUR, 50603, MALAYSIA; FACULTY OF APPLIED COMMUNICATION, MULTIMEDIA UNIVERSITY, PERSIARAN MULTIMEDIA, SELANGOR, CYBERJAYA, 63100, MALAYSIA	INT. J. DATA NETW. SCI.	THE MALAYSIAN GOVERNMENT ACTIVELY ENCOURAGES THE DEVELOPMENT OF E-WALLETS IN MALAYSIA AND SET A GOAL TO ENTER A CASHLESS SOCIETY BY 2050. HOWEVER, THE MOBILE TECHNOLOGY THAT HAS SWEPT THE WORLD DOES NOT SEEM TO BE DEVELOPING SMOOTHLY IN MALAYSIA. THE OBJECTIVE OF THE STUDY IS TO INVESTIGATE THE DETERMINANTS THAT IMPACT THE USER BEHAVIOR OF MALAYSIANS IN ADOPTING E-WALLETS AND PROPOSES INTEGRATION…	T.J. CHAN; FACULTY OF APPLIED COMMUNICATION, MULTIMEDIA UNIVERSITY, PERSIARAN MULTIMEDIA, CYBERJAYA, SELANGOR, 63100, MALAYSIA; EMAIL: TJCHAN@MMU.EDU.MY	10.5267/j.ijdns.2023.7.007	25618148	INTERNATIONAL JOURNAL OF DATA AND NETWORK SCIENCE	ENGLISH	0	4	GROWING SCIENCE	ISI	FACTORS AFFECTING THE ADOPTION OF EWALLETS TO ENTER CASHLESS SOCIETY AN INTEGRATION APPROACH	ARTICLE	7	2023	HASHIM NOR HAZLINA;CHAN TAK JIE;LI PANFENG	INT J DATA NETW SCI	none	UNIVERSITI MALAYA;MULTIMEDIA UNIVERSITY	NOTREPORTED;MULTIMEDIA UNIVERSITY;NOTREPORTED		HASHIM NH, 2023, INT J DATA NETW SCI	HASHIM NH, 2023, INT J DATA NETW SCI	MALAYSIA	HASHIM NH, 2023,	wos
SUN N;ZHU C;ZHANG Y;LIU Y	ATTRIBUTE ENCRYPTION; BLOCKCHAIN; DIGITAL IDENTITY; LOGISTICS; PRIVACY PROTECTION; SMART CONTRACT	AUTHORIZATION; BLOCKCHAIN; ELECTRONIC DOCUMENT IDENTIFICATION SYSTEMS; INTERNET OF THINGS; PRIVACY-PRESERVING TECHNIQUES; ATTRIBUTE ENCRYPTION; BLOCK-CHAIN; DATA LEAKAGE; DIGITAL IDENTITY; DIGITAL TRANSFORMATION; LOGISTICS COMPANY; LOGISTICS INDUSTRY; PRIVACY PRESERVING; PRIVACY PROTECTION; TIME USE; SMART CONTRACT	SCHOOL OF MICROELECTRONICS AND CONTROL ENGINEERING, CHANGZHOU UNIVERSITY, CHANGZHOU, 213000, CHINA; SCHOOL OF COMPUTER SCIENCE AND ARTIFICIAL INTELLIGENCE, CHANGZHOU UNIVERSITY, CHANGZHOU, 213000, CHINA; SHANGHAI SHENTIE INFORMATION ENGINEERING CO., LTD, NO.12, HUANGCHENGDONG ROAD, SHANGCHENG DISTRICT, HANGZHOU, 310009, CHINA; SCHOOL OF COMPUTER AND INFORMATION SECURITY, GUILIN UNIVERSITY OF ELEC…	FUTURE INTERNET	DIGITAL TRANSFORMATION OF THE LOGISTICS INDUSTRY TRIGGERED BY THE WIDESPREAD USE OF INTERNET OF THINGS (IOT) TECHNOLOGY HAS PROMPTED A SIGNIFICANT REVOLUTION IN LOGISTICS COMPANIES, FURTHER BRINGING HUGE DIVIDENDS TO SOCIETY. HOWEVER, THE CONCURRENT ACCELERATED GROWTH OF LOGISTICS COMPANIES ALSO SIGNIFICANTLY HINDERS THE SAFEGUARDING OF INDIVIDUAL PRIVACY. DIGITAL IDENTITY HAS ASCENDED TO HAVING …	N. SUN; SCHOOL OF MICROELECTRONICS AND CONTROL ENGINEERING, CHANGZHOU UNIVERSITY, CHANGZHOU, 213000, CHINA; EMAIL: NGSUN@CCZU.EDU.CN; C. ZHU; SCHOOL OF COMPUTER SCIENCE AND ARTIFICIAL INTELLIGENCE, CHANGZHOU UNIVERSITY, CHANGZHOU, 213000, CHINA; EMAIL: S22150812067@SMAIL.CCZU.EDU.CN	10.3390/fi15110361	19995903	FUTURE INTERNET	ENGLISH	2	11	MULTIDISCIPLINARY DIGITAL PUBLISHING INSTITUTE (MDPI)	ISI	AN IDENTITY PRIVACYPRESERVING SCHEME AGAINST INSIDER LOGISTICS DATA LEAKAGE BASED ON ONETIMEUSE ACCOUNTS	ARTICLE	15	2023	SUN NIGANG;ZHU CHENYANG;ZHANG YUANYI;LIU YINING	FUTURE INTERNET	none	CHANGZHOU UNIVERSITY;CHANGZHOU UNIVERSITY;GUILIN UNIVERSITY OF ELECTRONIC TECHNOLOGY	NOTREPORTED;CHANGZHOU UNIVERSITY;NOTREPORTED;NOTREPORTED;CHANGZHOU UNIVERSITY;NOTREPORTED		SUN N, 2023, FUTURE INTERNET	SUN N, 2023, FUTURE INTERNET	CHINA	SUN N, 2023,	wos
CHAUHAN V	MOBILE BANKING; MOBILE WALLET; PERCEIVED RISK; PROTECTION MOTIVATION; PROTECTIVE BEHAVIOR; SUPPRESSOR EFFECT; URBAN-RURAL COMPARISON	MOTIVATION; SOCIAL NETWORKING (ONLINE); MOBILE BANKINGS; MOBILE WALLET; ON THE GO; PERCEIVED RISK; PROTECTION MOTIVATION; PROTECTIVE BEHAVIOR; SOCIAL MEDIA; SUPPRESSOR EFFECT; URBAN-RURAL; URBAN-RURAL COMPARISON; BANKING; DIGITIZATION; ELECTRONIC COMMERCE; FINANCIAL SERVICES; FINANCIAL SYSTEM; FUTURE PROSPECT; INFORMATION AND COMMUNICATION TECHNOLOGY; MOBILE COMMUNICATION; RISK PERCEPTION; RURAL-…	DEPARTMENT OF MARKETING AND STRATEGY, ICFAI BUSINESS SCHOOL (IBS) HYDERABAD, IFHE UNIVERSITY, INDIA, HYDERABAD (UNDER IFHE – A DEEMED TO BE UNIVERSITY U/S 3 OF THE UGC ACT, 1956), DONTHANAPALLY, SHANKARAPALLI ROAD, TELANGANA, HYDERABAD, INDIA	TECHNOL. FORECAST. SOC. CHANGE	MOBILE WALLET/BANKING ALLOWS USERS TO HANDLE THEIR FINANCES ON THE GO AND DEFINES THE FUTURE OF FINANCIAL SERVICES. NEVERTHELESS, AS THE INCIDENCE OF CYBER THREATS CONTINUES TO INCREASE, THERE IS A CORRESPONDING INCREASE IN USERS' PERCEPTIONS OF RISK. THEREFORE, TO ADDRESS RISK PERCEPTIONS, IT IS IMPERATIVE TO INVESTIGATE AND UNDERSTAND THE PROTECTIVE BEHAVIOR OF USERS IN THIS DOMAIN. HOWEVER, TH…		10.1016/j.techfore.2024.123255	00401625	TECHNOLOGICAL FORECASTING AND SOCIAL CHANGE	ENGLISH	0		ELSEVIER INC.	ISI	UNDERSTANDING USERS PROTECTIVE BEHAVIOR AND ITS SUPPRESSOR EFFECT ON THE PERCEIVED RISK IN MWALLETBANKING USE AN INDIAN URBANRURAL COMPARISON	ARTICLE	201	2024	CHAUHAN VIKAS	TECHNOL FORECAST SOC CHANGE	none	IFHE UNIVERSITY	IFHE UNIVERSITY		CHAUHAN V, 2024, TECHNOL FORECAST SOC CHANGE	CHAUHAN V, 2024, TECHNOL FORECAST SOC CHANGE	INDIA	CHAUHAN V, 2024,	wos
RAHMAN S;NGUYEN-VIET B;NGUYEN Y;KAMRAN S	CONSUMERS; CONTINUED USE; FINTECH; GAMIFICATION; M-WALLETS; TRUST		SCHOOL OF MARKETING AND COMMUNICATION, VAASAN YLIOPISTO, VAASA, FINLAND; SCHOOL OF MANAGEMENT, UNIVERSITY OF ECONOMICS HO CHI MINH CITY, HO CHI MINH CITY, VIET NAM; DEPARTMENT OF BUSINESS ADMINISTRATION, FATIMA JINNAH WOMEN UNIVERSITY, RAWALPINDI, PAKISTAN; SCHOOL OF BUSINESS AND LAW, UNIVERSITY OF BRIGHTON, BRIGHTON, UNITED KINGDOM	INT. J. BANK MARK.	PURPOSE: M-WALLETS HAVE EMERGED AS ONE OF THE MOST IMPORTANT FINANCIAL INNOVATIONS OF THE 21ST CENTURY, ENABLING USERS TO CARRY DIGITAL CASH BY SECURELY STORING PAYMENT METHODS ON THEIR MOBILE DEVICES. HOWEVER, THE CONTINUED USE OF M-WALLETS VARIES AMONG PEOPLE FOR SEVERAL REASONS. THIS STUDY USED THE TECHNOLOGY CONTINUATION THEORY (TCT), GAMIFICATION AND TRUST FACTORS TO EXAMINE THE VARIABLES AF…	S. RAHMAN; SCHOOL OF MARKETING AND COMMUNICATION, VAASAN YLIOPISTO, VAASA, FINLAND; EMAIL: IMSALEEMUR@GMAIL.COM	10.1108/IJBM-01-2023-0033	02652323	INTERNATIONAL JOURNAL OF BANK MARKETING	ENGLISH	1		EMERALD PUBLISHING	ISI	PROMOTING FINTECH DRIVING DEVELOPING COUNTRY CONSUMERS MOBILE WALLET USE THROUGH GAMIFICATION AND TRUST	ARTICLE		2024	RAHMAN SALEEM UR;NGUYEN-VIET BANG;NGUYEN YEN THI HOANG;KAMRAN SOHAIL	INT J BANK MARK	none	SCHOOL OF MARKETING AND COMMUNICATION;UNIVERSITY OF ECONOMICS HO CHI MINH CITY;FATIMA JINNAH WOMEN UNIVERSITY;UNIVERSITY OF BRIGHTON	NOTREPORTED;SCHOOL OF MARKETING AND COMMUNICATION;NOTREPORTED		RAHMAN S, 2024, INT J BANK MARK	RAHMAN S, 2024, INT J BANK MARK	UNITED KINGDOM	RAHMAN S, 2024,	wos
SARALAYA S;KUMAR P;SHEHZAD M;NIHAL M;NAGURE P	AUTOENCODERS; AWS; BIOMETRIC; CONTACTLESS PAYMENT; E-WALLETS; PALM PRINT	ELECTRONIC MONEY; PALMPRINT RECOGNITION; 'CURRENT; AUTO ENCODERS; AWS; CONTACTLESS PAYMENT; CREDIT CARDS; E-WALLET; PALMPRINTS; PAYMENT SYSTEMS; USER FRIENDLY; USERS' EXPERIENCES; BIOMETRICS	ST JOSEPH ENGINEERING COLLEGE, KARNATAKA, MANGALURU, INDIA; VISVESVARAYA TECHNOLOGICAL UNIVERSITY, KARNATAKA, BELAGAVI, INDIA	LECT. NOTES NETWORKS SYST.	CURRENT PAYMENT SYSTEMS, INCLUDING CASH, CREDIT CARDS, AND UPI CAN BE INCONVENIENT FOR USERS, PROMPTING THE NEED FOR A MORE ROBUST AND USER-FRIENDLY PAYMENT SYSTEM. BIOMETRIC AUTHENTICATION METHODS LIKE PALM PRINTS CAN ENHANCE SECURITY AND THE USER EXPERIENCE, BUT THERE IS A LACK OF A RELIABLE SYSTEM THAT INTEGRATES PALM PRINT RECOGNITION WITH E-WALLETS TO FACILITATE PAYMENTS AT PARTICIPATING MER…	S. SARALAYA; ST JOSEPH ENGINEERING COLLEGE, MANGALURU, KARNATAKA, INDIA; EMAIL: SRIDEVIS@SJEC.AC.IN	10.1007/978-981-99-9521-9_25	23673370	LECTURE NOTES IN NETWORKS AND SYSTEMS	ENGLISH	0		SPRINGER SCIENCE AND BUSINESS MEDIA DEUTSCHLAND GMBH	ISI	PAYBYPALM A CONTACTLESS PAYMENT SYSTEM	CONFERENCE PAPER	892	2024	SARALAYA SRIDEVI;KUMAR PRAVIN;SHEHZAD MOHAMMED;NIHAL MOHAMMED;NAGURE PRAGNYA	LECT NOTES NETWORKS SYST	none	ST JOSEPH ENGINEERING COLLEGE;VISVESVARAYA TECHNOLOGICAL UNIVERSITY	NOTREPORTED;ST JOSEPH ENGINEERING COLLEGE;NOTREPORTED		SARALAYA S, 2024, LECT NOTES NETWORKS SYST	SARALAYA S, 2024, LECT NOTES NETWORKS SYST	INDIA	SARALAYA S, 2024,	wos
KANG K	BLOCKCHAIN; CRYPTOCURRENCY; DOUBLE SPENDING; PRECAUTIONARY CONFIRMATION; TRADE HISTORY		SCHOOL OF BUSINESS, YONSEI UNIVERSITY, 50 YONSEI-RO, SEODAEMUN-GU, SEOUL, 03722, SOUTH KOREA	ECON. THEORY	WE DEVELOP A GENERAL EQUILIBRIUM MODEL OF CRYPTOCURRENCY TO STUDY A DOUBLE SPENDING PREVENTION MECHANISM WITHOUT PAYMENT CONFIRMATIONS. AGENTS TRADE CRYPTOCURRENCY USING A DIGITAL WALLET, AND THE CRYPTOCURRENCY SYSTEM PROVIDES A MEANS TO VERIFY A WALLET’S DOUBLE SPENDING HISTORY. A DIGITAL WALLET MAY OBTAIN A GOOD REPUTATION FOR NO DOUBLE SPENDING ATTEMPTS BASED ON ITS TRANSACTION HISTORY. IF A B…	K.-Y. KANG; SCHOOL OF BUSINESS, YONSEI UNIVERSITY, SEOUL, 50 YONSEI-RO, SEODAEMUN-GU, 03722, SOUTH KOREA; EMAIL: KEEYOUN@YONSEI.AC.KR	10.1007/s00199-021-01411-3	09382259	ECONOMIC THEORY	ENGLISH	6	2	SPRINGER SCIENCE AND BUSINESS MEDIA DEUTSCHLAND GMBH	ISI	CRYPTOCURRENCY AND DOUBLE SPENDING HISTORY TRANSACTIONS WITH ZERO CONFIRMATION	ARTICLE	75	2023	KANG KEE-YOUN	ECON THEORY	none	YONSEI UNIVERSITY	NOTREPORTED;YONSEI UNIVERSITY;NOTREPORTED		KANG KY, 2023, ECON THEORY	KANG KY, 2023, ECON THEORY	KOREA	KANG KY, 2023,	wos
SATYBALDY A;SUBEDI A;IDREES S	BLOCKCHAIN TECHNOLOGY; DECENTRALIZED IDENTITY; KEY MANAGEMENT; SELF-SOVEREIGN IDENTITY	AUTHENTICATION; DATA PRIVACY; DISTRIBUTED LEDGER; ECOSYSTEMS; ELECTRONIC DOCUMENT IDENTIFICATION SYSTEMS; RECOVERY; BLOCK-CHAIN; BLOCKCHAIN TECHNOLOGY; DECENTRALISED; DECENTRALIZED IDENTITY; DIGITAL IDENTITY; DIGITAL IDENTITY MANAGEMENT; IDENTITY MANAGEMENT SYSTEMS; KEY-MANAGEMENT; PRIVATE KEY; SELF-SOVEREIGN IDENTITY; BLOCKCHAIN	DEPARTMENT OF COMPUTER SCIENCE, NORWEGIAN UNIVERSITY OF SCIENCE AND TECHNOLOGY (NTNU), TRONDHEIM, NORWAY	SIGNALS COMMUN. TECHNOL.	SELF-SOVEREIGN IDENTITY (SSI) IS CONSIDERED BY EXPERTS AS THE NEXT STEP IN THE EVOLUTION OF DIGITAL IDENTITY MANAGEMENT SYSTEMS. BLOCKCHAIN AND DISTRIBUTED LEDGER TECHNOLOGIES HAVE PROVIDED THE NECESSARY BUILDING BLOCKS AND FACILITIES THAT BRING US CLOSER TO THE REALIZATION OF THE OBJECTIVES AND IDEALS OF SSI. IN CONTRAST TO MOST PREVIOUS IDENTITY MANAGEMENT SYSTEMS, WHERE THE SERVICE PROVIDER WA…	S.M. IDREES; DEPARTMENT OF COMPUTER SCIENCE, NORWEGIAN UNIVERSITY OF SCIENCE AND TECHNOLOGY (NTNU), TRONDHEIM, NORWAY; EMAIL: SHEIKH.M.IDREES@NTNU.NO	10.1007/978-3-031-49593-9_3	18604862	SIGNALS AND COMMUNICATION TECHNOLOGY	ENGLISH	1		SPRINGER SCIENCE AND BUSINESS MEDIA DEUTSCHLAND GMBH	ISI	DECENTRALIZED KEY MANAGEMENT FOR DIGITAL IDENTITY WALLETS	BOOK CHAPTER	PART F2283	2024	SATYBALDY ABYLAY;SUBEDI ANUSHKA;IDREES SHEIKH MOHAMMAD	SIGNALS COMMUN TECHNOL	none	NORWEGIAN UNIVERSITY OF SCIENCE AND TECHNOLOGY (NTNU)	NOTREPORTED;NORWEGIAN UNIVERSITY OF SCIENCE AND TECHNOLOGY (NTNU);NOTREPORTED		SATYBALDY A, 2024, SIGNALS COMMUN TECHNOL	SATYBALDY A, 2024, SIGNALS COMMUN TECHNOL	NORWAY	SATYBALDY A, 2024,	wos
ABDIRAHMAN A;HASHI A;DAHIR U;ELMI M;RODRIGUEZ O	FRAUD DETECTION; LOGISTIC REGRESSION; MACHINE LEARNING; MOBILE WALLET; RANDOM FOREST; SUPPORT VECTOR MACHINE		FACULTY OF COMPUTING, SIMAD UNIVERSITY, MOGADISHU, SOMALIA; DEPARTMENT OF COMPUTER SCIENCE, FACULTY OF INFORMATICS, ISTANBUL TEKNIK UNIVERSITESI, ISTANBUL, TURKEY	SSRG. INT. J. ELECTRON. COMMUN. ENG.	THIS PAPER PRESENTS A NOVEL APPROACH TO ENHANCING THE SECURITY OF FINANCIAL TRANSACTIONS WITHIN MOBILE WALLET APPLICATIONS THROUGH THE IMPLEMENTATION OF MACHINE LEARNING-BASED FRAUD DETECTION MODELS. THIS STUDY IMPLEMENTS FOUR MACHINE LEARNING MODELS: RANDOM FOREST, LOGISTIC REGRESSION, SUPPORT VECTOR MACHINE AND ARTIFICIAL NEURAL NETWORKS (ANN), AND IT EVALUATES THE EFFECTIVENESS OF THESE MODELS…	A.A. ABDIRAHMAN; FACULTY OF COMPUTING, SIMAD UNIVERSITY, MOGADISHU, SOMALIA; EMAIL: AAAYARE@SIMAD.EDU.SO	10.14445/23488549/IJECE-V11I3P110	23488549	SSRG INTERNATIONAL JOURNAL OF ELECTRONICS AND COMMUNICATION ENGINEERING	ENGLISH	0	3	SEVENTH SENSE RESEARCH GROUP	ISI	ENHANCING SECURITY IN MOBILE WALLET PAYMENTS MACHINE LEARNINGBASED FRAUD DETECTION ACROSS PROMINENT WALLET PLATFORMS	ARTICLE	11	2024	ABDIRAHMAN ABDULLAHI AHMED;HASHI ABDIRAHMAN OSMAN;DAHIR UBAID MOHAMED;ELMI MOHAMED ABDIRAHMAN;RODRIGUEZ OCTAVIO ERNEST ROMO	SSRG INT J ELECTRON COMMUN ENG	none	SIMAD UNIVERSITY;ISTANBUL TEKNIK UNIVERSITESI	NOTREPORTED;SIMAD UNIVERSITY;NOTREPORTED		ABDIRAHMAN AA, 2024, SSRG INT J ELECTRON COMMUN ENG	ABDIRAHMAN AA, 2024, SSRG INT J ELECTRON COMMUN ENG	TURKEY	ABDIRAHMAN AA, 2024,	wos
CARBÓ-VALVERDE S;CUADROS-SOLAS P;RODRÍGUEZ-FERNÁNDEZ F;SÁNCHEZ-BÉJAR J	CASH; COVID-19; MOBILITY RESTRICTIONS; PAYMENTS		UNIVERSITY OF VALENCIA. DEPARTMENT OF ECONOMICS, AV. DELS TARONGERS, S/N, VALENCIA, 46022, SPAIN; CUNEF UNIVERSIDAD. DEPARTMENT OF ECONOMICS, C/PIRINEOS, 55, MADRID, 28040, SPAIN; UNIVERSITY OF GRANADA, DEPARTMENT OF ECONOMIC THEORY AND HISTORY, CAMPUS CARTUJA, GRANADA, 18011, SPAIN; FUNCAS FOUNDATION, C/ CABALLERO DE GRACIA, 28, MADRID, 28013, SPAIN	J. BEHAV. EXP. FINANC.	THIS PAPER EXAMINES THE IMPACT OF THE COVID-19 MOBILITY RESTRICTIONS ON THE PAYMENT CHOICES AT BRICK-AND-MORTAR ESTABLISHMENTS. THE ASYMMETRIES IN THE IMPLEMENTATION OF THE COVID-19 MOBILITY RESTRICTIONS ACROSS THE SPANISH PROVINCES SERVES AS A QUASI-NATURAL EXPERIMENT. THE FINDINGS SHOW THAT THE SEVERITY OF THE MOBILITY RESTRICTIONS HAD AN IMPACT ON PAYMENT CHOICES. INDIVIDUALS IN AREAS WITH MOR…	P.J. CUADROS-SOLAS; CUNEF UNIVERSIDAD. DEPARTMENT OF ECONOMICS, MADRID, C/PIRINEOS, 55, 28040, SPAIN; EMAIL: PEDRO.CUADROS@CUNEF.EDU	10.1016/j.jbef.2023.100850	22146350	JOURNAL OF BEHAVIORAL AND EXPERIMENTAL FINANCE	ENGLISH	1		ELSEVIER B.V.	ISI	MOBILITY RESTRICTIONS AND PAYMENT CHOICES THE CASE OF THE COVID19 PANDEMIC	ARTICLE	40	2023	CARBÓ-VALVERDE SANTIAGO;CUADROS-SOLAS PEDRO J;RODRÍGUEZ-FERNÁNDEZ FRANCISCO;SÁNCHEZ-BÉJAR JOSÉ JUAN	J BEHAV EXP FINANC	none	UNIVERSITY OF VALENCIA. DEPARTMENT OF ECONOMICS;CUNEF UNIVERSIDAD. DEPARTMENT OF ECONOMICS;UNIVERSITY OF GRANADA;FUNCAS FOUNDATION	NOTREPORTED;CUNEF UNIVERSIDAD. DEPARTMENT OF ECONOMICS;NOTREPORTED		CARBÓ-VALVERDE S, 2023, J BEHAV EXP FINANC	CARBÓ-VALVERDE S, 2023, J BEHAV EXP FINANC	SPAIN	CARBÓ-VALVERDE S, 2023,	wos
GRAMMATOPOULOS A;STYLIANOU I;RAMOS E;GUTIERREZ-AGUERO I;REGUEIRO C;POLITIS I	AUTHENTICATION MANAGER; DIGITAL WALLETS; EIDAS; GAIA-X; SELF-SOVEREIGN IDENTITY	AUTHORIZATION; NETWORK ARCHITECTURE; AUTHENTICATION MANAGER; AUTHENTICATION MECHANISMS; BLOCK-CHAIN; DIGITAL WALLETS; EIDAS; GAIA-X; POWER; SELF-SOVEREIGN IDENTITY; USER AUTHENTICATION; USER IDENTITY; AUTHENTICATION	TECNALIA BASQUE RESEARCH AND TECHNOLOGY ALLIANCE, SPAIN; INQBIT INNOVATIONS SRL, ROMANIA; INDUSTRIAL SYSTEMS INSTITUTE, ATHENA RESEARCH CENTER, GREECE	IEEE INT. WORKSHOP COMPUT. AIDED MODEL. DES. COMMUN. LINKS NETWORKS, CAMAD	IN TODAY'S DIGITAL REALM, SECURE AND EFFECTIVE USER AUTHENTICATION MECHANISMS ARE OF PARAMOUNT IMPORTANCE. THIS PAPER DELVES INTO THE INTRICATE ARCHITECTURE OF THE AUTHENTICATION MANAGER (AM), SPECIFICALLY DESIGNED TO HARNESS THE POWER OF SELF-SOVEREIGN IDENTITY (SSI) USING BLOCKCHAIN TECHNOLOGY FOR THE TRUSTEE SYSTEM. CENTRAL TO THE AM'S DESIGN IS THE INNOVATIVE INTEGRATION OF SSI FOR USER AUTHE…	A. GRAMMATOPOULOS; INQBIT INNOVATIONS SRL, ROMANIA; EMAIL: ATHANASIOS.GRAMMATOPOULOS@INQBIT.IO	10.1109/CAMAD59638.2023.10478431	23784873	IEEE INTERNATIONAL WORKSHOP ON COMPUTER AIDED MODELING AND DESIGN OF COMMUNICATION LINKS AND NETWORKS, CAMAD	ENGLISH	0		INSTITUTE OF ELECTRICAL AND ELECTRONICS ENGINEERS INC.	ISI	ARCHITECTURAL INSIGHTS INTO TRUSTEES AUTHENTICATION MANAGER LEVERAGING SSI AND EIDAS	CONFERENCE PAPER		2023	GRAMMATOPOULOS ATHANASIOS;STYLIANOU IOANNIS;RAMOS ENEKO GOMEZ;GUTIERREZ-AGUERO IVAN;REGUEIRO CRISTINA;POLITIS ILIAS	IEEE INT WORKSHOP COMPUT AIDED MODEL DES COMMUN LINKS NETWORKS, CAMAD	none	TECNALIA BASQUE RESEARCH AND TECHNOLOGY ALLIANCE;INDUSTRIAL SYSTEMS INSTITUTE	NOTREPORTED;NOTREPORTED;NOTREPORTED		GRAMMATOPOULOS A, 2023, IEEE INT WORKSHOP COMPUT AIDED MODEL DES COMMUN LINKS NETWORKS, CAMAD	GRAMMATOPOULOS A, 2023, IEEE INT WORKSHOP COMPUT AIDED MODEL DES COMMUN LINKS NETWORKS, CAMAD	GREECE	GRAMMATOPOULOS A, 2023, IEEE INT WORKSHOP COMPUT AIDED MODEL DES COMMUN LINKS NETWORKS,	wos
BUKHARI S;JANJUA M;QADIR J	BITCOIN; BLOCKCHAIN; BLOCKCHAINS; CRYPTO WALLETS; CRYPTOCURRENCY; ELLIPTIC CURVE CRYPTOGRAPHY; ENCRYPTION; MASTER PHRASE; MNEMONIC PHRASE; PEER-TO-PEER COMPUTING; SECURITY; SECURITY; SEED PHRASE STORAGE	BITCOIN; BLOCKCHAIN; PEER TO PEER NETWORKS; PUBLIC KEY CRYPTOGRAPHY; RISK ASSESSMENT; BLOCK-CHAIN; CRYPTO WALLET; CURVE CRYPTOGRAPHY; ELLIPTIC CURVE; ELLIPTIC CURVE CRYPTOGRAPHY; MASTER PHRASE; MNEMONIC PHRASE; PEER-TO-PEER COMPUTING; SECURITY; SEED PHRASE STORAGE; GEOMETRY	NATIONAL UNIVERSITY OF COMPUTER, EMERGING SCIENCES (NUCES-FAST); INFORMATION TECHNOLOGY UNIVERSITY OF PUNJAB (ITU); QATAR UNIVERSITY, DOHA, QATAR	IEEE OPEN J. COMPUT. SOC.	BLOCKCHAIN TECHNOLOGY ENABLES USERS TO CONTROL AND RECORD THEIR CRYPTOCURRENCY TRANSACTIONS THROUGH THE USE OF DIGITAL WALLETS. AS THE USE OF BLOCKCHAIN TECHNOLOGY AND CRYPTOCURRENCY WALLETS CONTINUES TO GROW IN POPULARITY, THE POTENTIAL FOR ATTACKS ON THESE WALLETS INCREASES, AS ATTACKERS SEEK TO GAIN ACCESS TO THE LARGE SUMS OF CRYPTOCURRENCY THEY CONTAIN. TO MITIGATE THESE RISKS, IT IS IMPORTA…		10.1109/OJCS.2024.3398794	26441268	IEEE OPEN JOURNAL OF THE COMPUTER SOCIETY	ENGLISH	0		INSTITUTE OF ELECTRICAL AND ELECTRONICS ENGINEERS INC.	ISI	SECURE STORAGE OF CRYPTO WALLET SEED PHRASE USING ECC AND SPLITTING TECHNIQUE	ARTICLE		2024	BUKHARI SYEDA TAYYABA;JANJUA MUHAMMAD UMAR;QADIR JUNAID	IEEE OPEN J COMPUT SOC	none	NATIONAL UNIVERSITY OF COMPUTER;INFORMATION TECHNOLOGY UNIVERSITY OF PUNJAB (ITU);QATAR UNIVERSITY	NATIONAL UNIVERSITY OF COMPUTER;INFORMATION TECHNOLOGY UNIVERSITY OF PUNJAB (ITU);QATAR UNIVERSITY		BUKHARI ST, 2024, IEEE OPEN J COMPUT SOC	BUKHARI ST, 2024, IEEE OPEN J COMPUT SOC	QATAR	BUKHARI ST, 2024,	wos
KHASAWNEH M;AL-ROUSAN M;AL-HADDAD S;SHARABATI A;SEWAN R	DIGITAL WALLETS; PERCEIVED EASE OF USE; PERCEIVED USEFULNESS; TECHNOLOGY ACCEPTANCE MODEL (TAM)		KING TALAL SCHOOL OF BUSINESS TECHNOLOGY, PRINCESS SUMAYA UNIVERSITY FOR TECHNOLOGY, AMMAN, JORDAN; BUSINESS FACULTY, MIDDLE EAST UNIVERSITY, AMMAN, JORDAN	INT. J. DATA NETW. SCI.	THE CURRENT RESEARCH PAPER AIMS TO PINPOINT THE DETERMINANTS THAT IMPACT CONSUMERS' PERCEIVED EASE AND PERCEIVED USEFULNESS OF DIGITAL WALLET USAGE IN JORDAN. TO ACCOMPLISH THIS, THE TECHNOLOGY ACCEPTANCE MODEL (TAM) HAS BEEN USED, WHICH ENCOMPASSES ADDITIONAL DIMENSIONS LIKE THE PERCEIVED RISK OF COVID-19, SOCIAL INFLUENCE, GOVERNMENT SUPPORT, PROMOTIONAL BENEFITS, PERCEIVED VALUE, AND PERSONAL …	A.-A.A. SHARABATI; BUSINESS FACULTY, MIDDLE EAST UNIVERSITY, AMMAN, JORDAN; EMAIL: APHARMAARTS@GMAIL.COM	10.5267/j.ijdns.2023.11.014	25618148	INTERNATIONAL JOURNAL OF DATA AND NETWORK SCIENCE	ENGLISH	0	2	GROWING SCIENCE	ISI	FACTORS AFFECTING CONSUMERS BEHAVIORAL INTENTIONS TO USE AND ADOPT DIGITAL WALLETS	ARTICLE	8	2024	KHASAWNEH MOHAMMAD HAMDI AL;AL-ROUSAN MOHAMMAD;AL-HADDAD SHAFIG;SHARABATI ABDEL-AZIZ AHMAD;SEWAN REEM	INT J DATA NETW SCI	none	PRINCESS SUMAYA UNIVERSITY FOR TECHNOLOGY;MIDDLE EAST UNIVERSITY	NOTREPORTED;MIDDLE EAST UNIVERSITY;NOTREPORTED		KHASAWNEH MHA, 2024, INT J DATA NETW SCI	KHASAWNEH MHA, 2024, INT J DATA NETW SCI	JORDAN	KHASAWNEH MHA, 2024,	wos
ARORA S;MADAN P	BLOCKCHAIN; DIGITAL WALLETS; FINTECH; INSURTECH; REGTECH; STARTUPS; UNICORNS		FACULTY OF MANAGEMENT STUDIES, GURUKUL KANGRI (DEEMED TO BE UNIVERSITY), HARIDWAR, UTTARAKHAND, INDIA	CONTEMP. STUD. OF RISKS IN EMERG. TECHNOL., PART A	PURPOSE: THE GOAL OF THIS STUDY IS TO DELVE INTO THE CAUSES BEHIND THE FINTECH SECTOR'S RISE IN VARIOUS AREAS AND ITS PROSPECTS. FINTECH IS RAPIDLY EXPANDING BECAUSE OF GOVERNMENT LEGISLATION, MULTIPLE SCHEMES, CONSUMER EXPECTATIONS, A CASHLESS ECONOMY, DIGITISATION, GLOBALISATION, INNOVATION, AND OTHER DRIVERS. NEED FOR THE STUDY: FINTECH FIRMS ARE FORMING ALLIANCES WITH TRADITIONAL FINANCIAL OR…		10.1108/978-1-80455-562-020231014		CONTEMPORARY STUDIES OF RISKS IN EMERGING TECHNOLOGY, PART A	ENGLISH	2		EMERALD GROUP PUBLISHING LTD.	ISI	CONCEPTUAL FRAMEWORK DEPICTING THE DRIVERS FOR THE FINTECH GROWTH AN OUTLOOK FOR INDIA	BOOK CHAPTER		2023	ARORA SHREYA;MADAN PANKAJ	CONTEMP STUD OF RISKS IN EMERG TECHNOL, PART A	none	GURUKUL KANGRI (DEEMED TO BE UNIVERSITY)	GURUKUL KANGRI (DEEMED TO BE UNIVERSITY)		ARORA S, 2023, CONTEMP STUD OF RISKS IN EMERG TECHNOL, PART A	ARORA S, 2023, CONTEMP STUD OF RISKS IN EMERG TECHNOL, PART A	INDIA	ARORA S, 2023, CONTEMP STUD OF RISKS IN EMERG TECHNOL,	wos
CHACKO P;HYCINTH F;RAMANATHAN H	CONFIRMATION; E-WALLET USAGE; PERCEIVED SECURITY; PERCEIVED USEFULNESS; TRUST		TOC H INSTITUTE OF SCIENCE & TECHNOLOGY, INDIA; COCHIN UNIVERSITY OF SCIENCE AND TECHNOLOGY, INDIA	J. TELECOMMUN. DIGIT. ECON.	THE POST-PANDEMIC ERA WITNESSED AN UPSURGE IN DIGITAL WALLET USAGE. THE PURPOSE OF THIS CROSS-SECTIONAL STUDY IS TO EMPIRICALLY EXAMINE THE FACTORS INFLUENCING THE POST-ADOPTION INTENTION OF E-WALLET USERS AMONG INDIAN WOMEN AND THE DIGITAL DIVIDE ACROSS AGE GROUPS. VALIDATED QUESTIONNAIRES WERE USED TO COLLECT DATA FROM FEMALE RESPONDENTS ACROSS INDIA. PATH ANALYSIS USING STRUCTURAL EQUATION MOD…		10.18080/jtde.v11n2.701	22031693	JOURNAL OF TELECOMMUNICATIONS AND THE DIGITAL ECONOMY	ENGLISH	0	2	TELECOMMUNICATIONS ASSOCIATION INC.	ISI	EWALLET AND WOMEN IN INDIA DRIVERS OF POSTADOPTION INTENTION AND THE DIVIDE ACROSS AGE	ARTICLE	11	2023	CHACKO PEARLY SAIRA;HYCINTH FRANK;RAMANATHAN HAREESH N	J TELECOMMUN DIGIT ECON	none	TOC H INSTITUTE OF SCIENCE AND TECHNOLOGY;COCHIN UNIVERSITY OF SCIENCE AND TECHNOLOGY	TOC H INSTITUTE OF SCIENCE AND TECHNOLOGY;COCHIN UNIVERSITY OF SCIENCE AND TECHNOLOGY		CHACKO PS, 2023, J TELECOMMUN DIGIT ECON	CHACKO PS, 2023, J TELECOMMUN DIGIT ECON	INDIA	CHACKO PS, 2023,	wos
MOHAMED N;SULTAN N;RAJAMANICKAM A	CONTROL JEL: K2; FRAUD; G28; ILLEGAL INVESTMENT		ACCOUNTING RESEARCH INSTITUTE OF UNIVERSITY TECHNOLOGY MARA, MALAYSIA; DEPARTMENT OF MANAGEMENT SCIENCES, UNIVERSITY OF GUJRAT, PAKISTAN; UNIVERSITY MALAYSIA, MALAYSIA	PAK. J. CRIMINOL.	ILLEGAL INVESTMENT SCHEMES HAVE BEEN A LONG-STANDING PROBLEM IN MALAYSIA. ACCORDING TO THE MOST CURRENT NATIONAL RISK ASSESSMENT CONDUCTED BY BANK NEGARA MALAYSIA, FRAUD IS THE MOST WIDESPREAD, WITH THE MOST CONSIDERABLE LOSSES RECORDED. DESPITE REPEATED EFFORTS TO CRACK DOWN ON THE OPERATION OF UNLAWFUL INVESTMENT SCHEMES, THE REPORTED CASES SHOWED A GROWING TREND WITH TOTAL LOSSES YEAR ON YEAR.…	N. SULTAN; DEPARTMENT OF MANAGEMENT SCIENCES, UNIVERSITY OF GUJRAT, PAKISTAN; EMAIL: NASIR.TARAR@UOG.EDU.PK		20742738	PAKISTAN JOURNAL OF CRIMINOLOGY	ENGLISH	0	4	PAKISTAN SOCIETY OF CRIMINOLOGY	ISI	MODERN ILLEGAL INVESTMENT SCHEMES AN ASSESSMENT OF ITS COMBATING REGIME IN MALAYSIA	ARTICLE	15	2023	MOHAMED NORAZIDA;SULTAN NASIR;RAJAMANICKAM AUROVINDAN	PAK J CRIMINOL	none	ACCOUNTING RESEARCH INSTITUTE OF UNIVERSITY TECHNOLOGY MARA;UNIVERSITY OF GUJRAT;UNIVERSITY MALAYSIA	NOTREPORTED;UNIVERSITY OF GUJRAT;NOTREPORTED		MOHAMED N, 2023, PAK J CRIMINOL	MOHAMED N, 2023, PAK J CRIMINOL	MALAYSIA	MOHAMED N, 2023,	wos
NUSTINI Y;TUMEWANG Y;WARDHANI A	CONSUMERISM; E-WALLET-PROVIDERS; HUMANITY		ISLAMIC UNIVERSITY OF INDONESIA, INDONESIA	REV. INTEGR. BUS. ECON. RES.	THIS STUDY AIMS TO ANALYZE THE IMPACT ON CONSUMERISM CAUSED BY THE USE OF E-WALLET AND THE FACTORS THAT MOTIVATE PEOPLE TO UTILIZE E-WALLET. THE SAMPLE SIZE WAS 210, WHERE THE RESPONDENTS WERE MILLENNIAL GENERATION REPRESENTED BY UNIVERSITY STUDENT CLASS OF 2016 TO 2018 AND HAVE BEEN UTILIZING E-WALLET. THIS STUDY ADOPTED TAM AND TPB TO DEVELOP THE MODEL. THE STUDY PROPOSED 5 HYPOTHESES TESTED US…			24146722	REVIEW OF INTEGRATIVE BUSINESS AND ECONOMICS RESEARCH	ENGLISH	0	3	GMP PRESS & PRINTING CO.,	ISI	CONSUMERISM DRIVEN BY THE USE OF EWALLET	ARTICLE	13	2024	NUSTINI YUNI;TUMEWANG YUNICE KARINA;WARDHANI AJENG AMBAR	REV INTEGR BUS ECON RES	none	ISLAMIC UNIVERSITY OF INDONESIA	ISLAMIC UNIVERSITY OF INDONESIA		NUSTINI Y, 2024, REV INTEGR BUS ECON RES	NUSTINI Y, 2024, REV INTEGR BUS ECON RES	INDONESIA	NUSTINI Y, 2024,	wos
PAULINA L;SANTOSO A;AN C;RAHMIATI F;YUSTINA A	ADOPTION INTENTION; COMPATIBILITY; E-WALLET TASKS; EMERGING PRODUCTS; MULTI-SIDED PLATFORM; RELATIVE ADVANTAGES; STRATEGIC ENTREPRENEURSHIP; TASK TECHNOLOGY FIT		FACULTY OF BUSINESS, PRESIDENT UNIVERSITY, WEST JAVA, CIKARANG, 17550, INDONESIA	INT. J. BUS.	THE FINDINGS FROM THIS RESEARCH SERVES AS INFORMATION EXCHANGE MECHANISM THROUGH CUSTOMER INTERACTIONS AND AIMS TO CONTRIBUTE TO ENHANCING THE STRATEGIC ENTREPRENEURSHIP OF THE MULTI-SIDED PLATFORM START-UPS THROUGH EFFICIENT IMPLEMENTATION OF E-WALLET SERVICES AS AN EMERGING PRODUCT. THE STUDY ADOPTS TASK TECHNOLOGY FIT MODEL IN ANALYZING THE E-WALLET ADOPTION INTENTION FOR TWO MARKETS: E-COMMER…		10.55802/IJB.029(1).002	10834346	INTERNATIONAL JOURNAL OF BUSINESS	ENGLISH	0	1	CHAOYANG UNIVERSITY OF TECHNOLOGY	ISI	WHAT DRIVES EMERGING PRODUCTS ADOPTION INTENTION COMPARING STRATEGIC ENTREPRENEURSHIP OUTCOME OF LEADING DIGITAL MULTISIDED PLATFORM STARTUPS	ARTICLE	29	2024	PAULINA LEONY;SANTOSO ADHI SETYO;AN CHONGMI;RAHMIATI FILDA;YUSTINA ANDI INA	INT J BUS	none	PRESIDENT UNIVERSITY	PRESIDENT UNIVERSITY		PAULINA L, 2024, INT J BUS	PAULINA L, 2024, INT J BUS	INDONESIA	PAULINA L, 2024,	wos
BHATTACHARYA S;BERA S	BRAND CHOICE MODEL; BRAND OUTCOMES; CONSUMER BEHAVIOR; M-WALLET SERVICE; MULTINOMIAL LOGIT; UTILITY MAXIMIZATION		XIM UNIVERSITY, BHUBANESWAR, 752050, INDIA; OPERATIONS MANAGEMENT AREA, INDIAN INSTITUTE OF MANAGEMENT RANCHI, SUCHANA BHAWAN, MEUR’S ROAD, RANCHI, 834008, INDIA	J. FINAN. SERV. MARK.	IN RECENT YEARS, THE MOBILE WALLET HAS CHANGED THE TRADITIONAL PAYMENT LANDSCAPE DUE TO THE GROWING POPULARITY OF SMARTPHONE USE AND THE MASS ADOPTION OF MOBILE WALLETS IN EMERGING MARKETS. THE EXISTING LITERATURE RELATED TO MOBILE WALLET SERVICES IS PRIMARILY FOCUSED ON VARIOUS ASPECTS SUCH AS PRODUCT ADOPTION AND TECHNOLOGY ACCEPTANCE, CONSUMER SATISFACTION, BEHAVIORAL ISSUES, BUYING INTENTION,…	S. BHATTACHARYA; XIM UNIVERSITY, BHUBANESWAR, 752050, INDIA; EMAIL: TOBESUBHO@GMAIL.COM	10.1057/s41264-024-00272-w	13630539	JOURNAL OF FINANCIAL SERVICES MARKETING	ENGLISH	0		PALGRAVE MACMILLAN	ISI	EXAMINING CONSUMERS MWALLET SERVICE BRAND CHOICE DECISIONS AT THE POSTADOPTION STAGE AN EMPIRICAL INVESTIGATION	ARTICLE		2024	BHATTACHARYA SUBHAJIT;BERA SASADHAR	J FINAN SERV MARK	none	XIM UNIVERSITY;INDIAN INSTITUTE OF MANAGEMENT RANCHI	NOTREPORTED;XIM UNIVERSITY;NOTREPORTED		BHATTACHARYA S, 2024, J FINAN SERV MARK	BHATTACHARYA S, 2024, J FINAN SERV MARK	INDIA	BHATTACHARYA S, 2024,	wos
LO W;KULATILLEKE G;SARHAN M;LAYEGHY S;PORTMANN M	ANOMALY DETECTION; CRYPTOCURRENCIES; DIGITAL FORENSICS; GRAPH NEURAL NETWORKS; MACHINE LEARNING	ANOMALY DETECTION; BLOCKCHAIN; DEEP LEARNING; DIGITAL FORENSICS; E-LEARNING; GRAPH NEURAL NETWORKS; LEARNING ALGORITHMS; LEARNING SYSTEMS; ANOMALY DETECTION; ANTI-MONEY LAUNDERING; DIGITAL WALLETS; EMBEDDINGS; GRAPH NEURAL NETWORKS; LAW-ENFORCEMENT AGENCIES; MACHINE-LEARNING; NETWORK NODE; OPEN SOURCE INTELLIGENCE; POWER; CLASSIFICATION (OF INFORMATION)	THE UNIVERSITY OF QUEENSLAND, BRISBANE, AUSTRALIA	APPL INTELL	CRIMINALS HAVE BECOME INCREASINGLY EXPERIENCED IN USING CRYPTOCURRENCIES, SUCH AS BITCOIN, FOR MONEY LAUNDERING. THE USE OF CRYPTOCURRENCIES CAN HIDE CRIMINAL IDENTITIES AND TRANSFER HUNDREDS OF MILLIONS OF DOLLARS OF DIRTY FUNDS THROUGH THEIR CRIMINAL DIGITAL WALLETS. HOWEVER, THIS IS CONSIDERED A PARADOX BECAUSE CRYPTOCURRENCIES ARE GOLDMINES FOR OPEN-SOURCE INTELLIGENCE, GIVING LAW ENFORCEMENT…	W.W. LO; THE UNIVERSITY OF QUEENSLAND, BRISBANE, AUSTRALIA; EMAIL: W.W.LO@UQ.NET.AU	10.1007/s10489-023-04504-9	0924669X	APPLIED INTELLIGENCE	ENGLISH	4	16	SPRINGER	ISI	INSPECTIONL SELFSUPERVISED GNN NODE EMBEDDINGS FOR MONEY LAUNDERING DETECTION IN BITCOIN	ARTICLE	53	2023	LO WAI WENG;KULATILLEKE GAYAN K;SARHAN MOHANAD;LAYEGHY SIAMAK;PORTMANN MARIUS	APPL INTELL	none	THE UNIVERSITY OF QUEENSLAND	NOTREPORTED;THE UNIVERSITY OF QUEENSLAND;NOTREPORTED		LO WW, 2023, APPL INTELL	LO WW, 2023, APPL INTELL	AUSTRALIA	LO WW, 2023,	wos
MOHD T T H;SUBRAMANIAM N;QOYUM A;IQBAL H H	CASHLESS; CONTINUOUS ADOPTION; DIGITAL MONEY; E-WALLETS; UTAUT2	MALAYSIA; ADAPTIVE MANAGEMENT; ELECTRONIC COMMERCE; FINANCIAL POLICY; LEAST SQUARES METHOD; TECHNOLOGY ADOPTION	DEPARTMENT OF ECONOMICS AND FINANCE, SUNWAY UNIVERSITY, SELANGOR, PETALING JAYA, MALAYSIA; INTERNATIONAL DATA CORPORATION (IDC), KUALA LUMPUR, MALAYSIA; FACULTY OF ISLAMIC ECONOMICS AND BUSINESS, STATE ISLAMIC UNIVERSITY SUNAN KALIJAGA, YOGYAKARTA, INDONESIA; TAYLOR'S BUSINESS SCHOOL, FACULTY OF BUSINESS AND LAW, TAYLOR'S UNIVERSITY, SELANGOR DARUL EHSAN, SUBANG JAYA, MALAYSIA; UNIVERSITY OF ECON…	INT. J. FINANC. ECON.	THIS STUDY ATTEMPTS TO INVESTIGATE THE FACTORS AFFECTING E-WALLET ADOPTION INTENTION IN MALAYSIA, WHICH CONSIDERED A CENTRAL PUSHFORWARD IN IMAGINING A CASHLESS SOCIETY. A THEORETICAL FRAMEWORK ADAPTING AN EXTENDED UNIFIED THEORY OF ACCEPTANCE AND USE OF TECHNOLOGY (UTAUT2) WITH TWO ADDITIONAL CONSTRUCTS, TRUST AND PERCEIVED SECURITY WAS APPLIED TO INVESTIGATE THE EFFECTS ON BEHAVIOURAL INTENTION…	H. MOHD THAS THAKER; DEPARTMENT OF ECONOMICS AND FINANCE, SUNWAY UNIVERSITY, PETALING JAYA, 5, JALAN UNIVERSITI, BANDAR SUNWAY, SELANGOR, 47500, MALAYSIA; EMAIL: HASSANUDINT@SUNWAY.EDU.MY	10.1002/ijfe.2596	10769307	INTERNATIONAL JOURNAL OF FINANCE AND ECONOMICS	ENGLISH	6	3	JOHN WILEY AND SONS LTD	ISI	CASHLESS SOCIETY EWALLETS AND CONTINUOUS ADOPTION	ARTICLE	28	2023	MOHD THAS THAKER HASSANUDIN;SUBRAMANIAM NIVIETHAN RAO;QOYUM ABDUL;IQBAL HUSSAIN HAFEZALI	INT J FINANC ECON	none	SUNWAY UNIVERSITY;STATE ISLAMIC UNIVERSITY SUNAN KALIJAGA;TAYLOR'S UNIVERSITY;UNIVERSITY OF ECONOMICS AND HUMAN SCIENCE	NOTREPORTED;SUNWAY UNIVERSITY;NOTREPORTED		MOHD THAS THAKER H, 2023, INT J FINANC ECON	MOHD THAS THAKER H, 2023, INT J FINANC ECON	POLAND	MOHD THAS THAKER H, 2023,	wos
YANG Q;SHI F	E-WALLET; MALAYSIAN YOUTH; MODELING (SMARTPLSSEM); PERCEIVED EASE OF USE (PEU); PERCEIVED SECURITY (PS); PERCEIVED USEFULNESS (PU); SMART PARTIAL LEAST SQUARES-STRUCTURAL EQUATION; TAM		QIANNAN NORMAL UNIVERSITY FOR NATIONALITIES, CHINA & UNIVERSITY OF THE CORDILLERAS, PHILIPPINES; ZHENGZHOU TOURISM COLLEGE, CHINA & CAVITE STATE UNIVERSITY, PHILIPPINES	UCJC BUSINESS SOC. REV.	IN RECENT YEARS, THE RAPID ADVANCEMENT OF DIGITAL TECHNOLOGY HAS TRANSFORMED THE LANDSCAPE OF FINANCIAL TRANSACTIONS, WITH E-WALLETS EMERGING AS A POPULAR METHOD OF PAYMENT AMONG VARIOUS DEMOGRAPHICS. AMONG THESE, THE YOUTH POPULATION IN MALAYSIA HAS DEMONSTRATED A SIGNIFICANT INCLINATION TOWARDS ADOPTING E-WALLETS DUE TO THEIR CONVENIENCE AND EFFICIENCY. UNDERSTANDING THE FACTORS THAT INFLUENCE …		10.3232/UBR.2024.V21.N1.01	26593270	UCJC BUSINESS AND SOCIETY REVIEW	ENGLISH	1	80	UNIVERSIA HOLDING	ISI	A TECHNOLOGY ACCEPTANCE MODEL TAM TOWARDS USE INTENTION OF EWALLET AMONG YOUTH IN MALAYSIA UN MODELO DE ACEPTACIÓN DE TECNOLOGÍA TAM HACIA LA INTENCIÓN DE USO DE LA BILLETERA ELECTRÓNICA ENTRE LOS JÓVENES EN MALASIA	ARTICLE	21	2024	YANG QINGQING;SHI FANGMING	UCJC BUSINESS SOC REV	none	QIANNAN NORMAL UNIVERSITY FOR NATIONALITIES;CHINA AND CAVITE STATE UNIVERSITY	QIANNAN NORMAL UNIVERSITY FOR NATIONALITIES;CHINA AND CAVITE STATE UNIVERSITY		YANG Q, 2024, UCJC BUSINESS SOC REV	YANG Q, 2024, UCJC BUSINESS SOC REV	PHILIPPINES	YANG Q, 2024,	wos
NEVES C;OLIVEIRA T;SANTINI F;GUTMAN L	DIGITAL BANKING; DIGITAL FINANCIAL SERVICES; DIGITAL PAYMENT SERVICES; DIGITAL WALLET; LITERATURE REVIEW; META ANALYSIS; WEIGHT ANALYSIS		NOVA INFORMATION MANAGEMENT SCHOOL (NOVA IMS), UNIVERSIDADE NOVA DE LISBOA, CAMPUS DE CAMPOLIDE, LISBOA, 1070-312, PORTUGAL; UNISINOS BUSINESS SCHOOL, UNIVERSIDADE DO VALE DO RIO DOS SINOS, CAMPUS DE PORTO ALEGRE, PORTO ALEGRE, 93022-750, BRAZIL; CTO E I&D MANAGER, AVENIDA DA LIBERDADE 144, 6° ESQUERDO, LISBOA, 1250-146, PORTUGAL; WOXSEN SCHOOL OF BUSINESS, KAMKOLE, SADASIVPET, TELANGANA, HYDERAB…	INT. J. INF. MANAG. DATA INSIGHTS	THE STUDY OF DIGITAL FINANCIAL SERVICES IS NOT RECENT; HOWEVER, SINCE COVID-19, NEW ATTENTION HAS BEEN GIVEN TO SOLUTIONS THAT AVOID FACE-TO-FACE INTERACTIONS. ACCORDINGLY, THE NUMBER OF STUDIES ON THE TOPIC OF DIGITAL FINANCIAL SERVICES HAS INCREASED, COVERING NEW TOPICS, SUCH AS DIGITAL WALLETS. THUS, THIS STUDY PRESENTS A WEIGHT AND META-ANALYSIS THAT SYNTHESISES PREVIOUS LITERATURE ON DIGITAL…	C. NEVES; NOVA INFORMATION MANAGEMENT SCHOOL (NOVA IMS), UNIVERSIDADE NOVA DE LISBOA, LISBOA, CAMPUS DE CAMPOLIDE, 1070-312, PORTUGAL; EMAIL: CNEVES@NOVAIMS.UNL.PT	10.1016/j.jjimei.2023.100201	26670968	INTERNATIONAL JOURNAL OF INFORMATION MANAGEMENT DATA INSIGHTS	ENGLISH	3	2	ELSEVIER B.V.	ISI	ADOPTION AND USE OF DIGITAL FINANCIAL SERVICES A META ANALYSIS OF BARRIERS AND FACILITATORS	REVIEW	3	2023	NEVES CATARINA;OLIVEIRA TIAGO;SANTINI FERNANDO;GUTMAN LUIS	INT J INF MANAG DATA INSIGHTS	none	UNIVERSIDADE NOVA DE LISBOA;UNIVERSIDADE DO VALE DO RIO DOS SINOS;WOXSEN SCHOOL OF BUSINESS	NOTREPORTED;UNIVERSIDADE NOVA DE LISBOA;NOTREPORTED		NEVES C, 2023, INT J INF MANAG DATA INSIGHTS	NEVES C, 2023, INT J INF MANAG DATA INSIGHTS	INDIA	NEVES C, 2023,	wos
NUR T	E-BUSINESS; E-WALLET; EXTENDED UTAUT MODEL; GENERATION Z	ACCEPTANCE TESTS; ELECTRONIC COMMERCE; FINANCE; LEAST SQUARES APPROXIMATIONS; E-WALLET; EASE-OF-USE; EBUSINESS; EXTENDED UNIFIED THEORY OF ACCEPTANCE AND USE OF TECHNOLOGY MODEL; GENERATION Z; ONLINE BUSINESS MODELS; PERCEIVED RISK; PERCEIVED USEFULNESS; SOCIAL NORM; THE UNIFIED THEORY OF ACCEPTANCE AND USE OF TECHNOLOGY(UTAUT); CONSUMER BEHAVIOR	BINA NUSANTARA UNIVERSITY, SCHOOL OF ACCOUNTING, FINANCE DEPARTMENT, JAKARTA, INDONESIA	INT. CONF. SOFTW. ENG. INF. TECHNOL., ICOSEIT	IN THE CONTEMPORARY DIGITAL LANDSCAPE, THE RELATIONSHIP BETWEEN E-BUSINESS AND E-WALLETS IS INTRICATE AND MUTUALLY REINFORCING. E-BUSINESS ENCOMPASSES VARIOUS ONLINE BUSINESS MODELS, WHILE E-WALLETS SERVE AS EFFICIENT PAYMENT TOOLS WITHIN THIS ECOSYSTEM. THIS RESEARCH PROVIDES INSIGHTS INTO FACTORS INFLUENCING GENERATION Z'S ADOPTION OF E-WALLETS. THIS STUDY EXPLORES THE IMPACT OF FACTORS SUCH AS…		10.1109/ICoSEIT60086.2024.10497467		2024 2ND INTERNATIONAL CONFERENCE ON SOFTWARE ENGINEERING AND INFORMATION TECHNOLOGY, ICOSEIT 2024	ENGLISH	0		INSTITUTE OF ELECTRICAL AND ELECTRONICS ENGINEERS INC.	ISI	GENERATION ZS ADOPTION OF EWALLET UNDERSTANDING FACTORS AND IMPLICATION FOR CONSUMPTIVE BEHAVIOR	CONFERENCE PAPER		2024	NUR TRIASESIARTA	INT CONF SOFTW ENG INF TECHNOL, ICOSEIT	none	BINA NUSANTARA UNIVERSITY	BINA NUSANTARA UNIVERSITY		NUR T, 2024, INT CONF SOFTW ENG INF TECHNOL, ICOSEIT	NUR T, 2024, INT CONF SOFTW ENG INF TECHNOL, ICOSEIT	INDONESIA	NUR T, 2024, INT CONF SOFTW ENG INF TECHNOL,	wos
KUHONTA E	ECONOMIC POPULISM; ELECTIONS; MOVE FORWARD PARTY; POLITICAL PARTIES; THAILAND	THAILAND; ECONOMIC DEVELOPMENT; ELECTORAL GEOGRAPHY; ELECTRONIC COMMERCE; PARTY POLITICS; POPULISM	MCGILL UNIVERSITY, MONTREAL, QC, CANADA	ASIAN SURV.	ON THE FACE OF IT, THAI POLITICS IN 2023 WAS GROUNDBREAKING. THE EVENT THAT ENCAPSULATED THE YEAR WAS THE STUNNING ELECTORAL VICTORY OF A RADICAL PARTY, MOVE FORWARD. THAT PARTY WAS EVENTUALLY BLOCKED FROM FORMING A GOVERNMENT BY AN ALLIANCE THAT INCLUDED PHEU THAI AND THE ROYALIST-CONSERVATIVE ELITE. WITH PHEU THAI AT THE HEAD OF GOVERNMENT, POPULIST POLICIES, MOST NOTABLY THE DIGITAL WALLET SCH…	E.M. KUHONTA; MCGILL UNIVERSITY, MONTREAL, CANADA; EMAIL: ERIK.KUHONTA@MCGILL.CA	10.1525/as.2024.64.2.278	00044687	ASIAN SURVEY	ENGLISH	0	2	UNIVERSITY OF CALIFORNIA PRESS	ISI	THAILAND IN 2023 THE MORE THINGS CHANGE THE MORE THEY STAY THE SAME	ARTICLE	64	2024	KUHONTA ERIK MARTINEZ	ASIAN SURV	none	MCGILL UNIVERSITY	NOTREPORTED;MCGILL UNIVERSITY;NOTREPORTED		KUHONTA EM, 2024, ASIAN SURV	KUHONTA EM, 2024, ASIAN SURV	CANADA	KUHONTA EM, 2024,	wos
DEVI P K V	DIGITAL FINANCIAL TRANSACTION; DIGITAL WALLETS; E-WALLETS; FINANCIAL INCLUSION; MOBILE PAYMENTS; SCALE DEVELOPMENT; SCALE VALIDATION		DEPARTMENT OF MARKETING, GITAM SCHOOL OF BUSINESS, GITAM DEEMED TO BE UNIVERSITY, ANDHRA PRADESH, VISAKHAPATNAM, 530 045, INDIA	INDIAN J. FINANC.	PURPOSE: MANY PEOPLE USED CASHLESS PAYMENT METHODS, MOSTLY E-WALLETS, DURING THE COVID-19 PANDEMIC. THIS INCENTIVIZED NUMEROUS FINANCIAL INSTITUTIONS AND BANKS TO OFFER E-WALLETS TO THEIR CLIENTELE, FACILITATING DIGITAL FINANCIAL TRANSACTIONS. GIVEN THE IMPORTANCE OF ASSESSING E-WALLET LITERACY, A CAREFULLY DESIGNED AND THOROUGHLY EXAMINED SCALE IS NEEDED. THIS STUDY AIMED TO CREATE AND PROVIDE A…	V.V. DEVI PRASAD KOTNI; DEPARTMENT OF MARKETING, GITAM SCHOOL OF BUSINESS, GITAM DEEMED TO BE UNIVERSITY, VISAKHAPATNAM, ANDHRA PRADESH, 530 045, INDIA; EMAIL: DEVI_KVV@YAHOO.COM	10.17010/ijf/2024/v18i1/171963	09738711	INDIAN JOURNAL OF FINANCE	ENGLISH	0	1	ASSOCIATED MANAGEMENT CONSULTANTS PVT. LTD.	ISI	EWALLET LITERACY SCALE DEVELOPMENT AND VALIDATION	ARTICLE	18	2024	DEVI PRASAD KOTNI VV	INDIAN J FINANC	none	GITAM DEEMED TO BE UNIVERSITY	NOTREPORTED;GITAM DEEMED TO BE UNIVERSITY;NOTREPORTED		DEVI PRASAD KOTNI VV, 2024, INDIAN J FINANC	DEVI PRASAD KOTNI VV, 2024, INDIAN J FINANC	INDIA	DEVI PRASAD KOTNI VV, 2024,	wos
MINZ S;MIKKILINENI R;DEWANGAN S			SANT GAHIRA GURU UNIVERSITY, AMBIKAPUR, INDIA; MICROSOFT, UNITED STATES; ICFAI UNIVERSITY, RAIPUR, INDIA	BUILD. SECURE BUS. MODELS THROUGH BLOCKCHAIN TECHNOL.: TACTICS, METHODS, LIMIT., AND PERFORM.	THE STUDY ANALYSES THE TRANSFORMATION OF THE TELECOM INDUSTRY THROUGH BLOCKCHAIN TECHNOLOGY AS INSTRUCTED BY TRAI. INDIA IS A DEVELOPING COUNTRY WHERE MANY SECTORS DEPEND ON TELECOMMUNICATION, WHICH MADE THE TELECOM INDUSTRY ADOPT BLOCKCHAIN TECHNOLOGY TO ELIMINATE VARIOUS SHORTCOMINGS AND PROVIDE SECURITY, TRANSPARENCY, IMMUTABILITY, AND CONTROL FROM THE POINT OF TRANSACTION AND HAVE AN IMMEDIAT…		10.4018/978-1-6684-7808-0.ch005		BUILDING SECURE BUSINESS MODELS THROUGH BLOCKCHAIN TECHNOLOGY: TACTICS, METHODS, LIMITATIONS, AND PERFORMANCE	ENGLISH	0		IGI GLOBAL	ISI	TRANSFORMATION OF THE TELECOM INDUSTRY AS A RESULT OF BLOCKCHAIN TECHNOLOGY IN INDIA	BOOK CHAPTER		2023	MINZ SRISHTI SHAIŤALI;MIKKILINENI RAVI;DEWANGAN SHWETA	BUILD SECURE BUS MODELS THROUGH BLOCKCHAIN TECHNOL: TACTICS, METHODS, LIMIT, AND PERFORM	none	SANT GAHIRA GURU UNIVERSITY;ICFAI UNIVERSITY	SANT GAHIRA GURU UNIVERSITY;NOTREPORTED;ICFAI UNIVERSITY		MINZ SS, 2023, BUILD SECURE BUS MODELS THROUGH BLOCKCHAIN TECHNOL: TACTICS, METHODS, LIMIT, AND PERFORM	MINZ SS, 2023, BUILD SECURE BUS MODELS THROUGH BLOCKCHAIN TECHNOL: TACTICS, METHODS, LIMIT, AND PERFORM	INDIA	MINZ SS, 2023, BUILD SECURE BUS MODELS THROUGH BLOCKCHAIN TECHNOL: TACTICS, METHODS, LIMIT,	wos
SHAW N;ESCHENBRENNER B	MOBILE WALLET; SERIAL MEDIATION; SERVICE CONVENIENCE; THEORY OF PLANNED BEHAVIOR	USER INTERFACES; ADOPTION INTENTION; BEHAVIORAL CONTROL; EMPIRICAL RESEARCH; MOBILE WALLET; POTENTIAL ADOPTION; SERIAL MEDIATION; SERVICE CONVENIENCE; SMART PHONES; SUBJECTIVE NORM; THEORY OF PLANNED BEHAVIOR; HUMAN COMPUTER INTERACTION	TED ROGERS SCHOOL OF MANAGEMENT, TORONTO METROPOLITAN UNIVERSITY, TORONTO, ON, CANADA; UNIVERSITY OF NEBRASKA AT KEARNEY, KEARNEY, NE, UNITED STATES	INT. J. HUM.-COMPUT. INTERACT.	COMPLETING PURCHASES MORE EFFICIENTLY IS APPEALING TO MANY INDIVIDUALS. MOBILE WALLETS CAN ENHANCE EFFICIENCY AS WELL AS PROVIDE GREATER CONVENIENCES. FOR EXAMPLE, INDIVIDUALS CAN PAY WITH THEIR SMARTPHONE AND TRANSFER MONEY TO FAMILY AND FRIENDS. ALTHOUGH MOBILE WALLET ADOPTION HAS INCREASED, ITS ADOPTION IS NOT PREVALENT. FOR MOBILE WALLETS TO BECOME MORE WIDELY USED, IT IS IMPORTANT TO IDENTIF…	N. SHAW; TED ROGERS SCHOOL OF MANAGEMENT, TORONTO METROPOLITAN UNIVERSITY, TORONTO, 350 VICTORIA STREET, M5B 2K3, CANADA; EMAIL: NORMAN.SHAW@TORONTOMU.CA	10.1080/10447318.2024.2314814	10447318	INTERNATIONAL JOURNAL OF HUMAN-COMPUTER INTERACTION	ENGLISH	0		TAYLOR AND FRANCIS LTD.	ISI	THE MEDIATION ROLE OF CONVENIENCE IN MOBILE WALLET ADOPTION	ARTICLE		2024	SHAW NORMAN;ESCHENBRENNER BRENDA	INT J HUM-COMPUT INTERACT	none	TORONTO METROPOLITAN UNIVERSITY;UNIVERSITY OF NEBRASKA AT KEARNEY	NOTREPORTED;TORONTO METROPOLITAN UNIVERSITY;NOTREPORTED		SHAW N, 2024, INT J HUM-COMPUT INTERACT	SHAW N, 2024, INT J HUM-COMPUT INTERACT	USA	SHAW N, 2024,	wos
KHOURDIFI Y;HANSALI A			LABORATORY OF SCIENCES OF MATERIALS, MATHEMATICS AND ENVIRONMENT, SULTAN MOULAY SLIMANE UNIVERSITY, POLYDISCIPLINARY FACULTY OF KHOURIBGA, BENI MELLAL, MOROCCO; ENCG, CADI AYYAD UNIVERSITY, MARRAKECH, MOROCCO	ADVANCES IN EMERG. FINANCIAL TECHNOLOGY AND DIGITAL MONEY	MOBILE PAYMENTS HAVE BECOME A CRITICAL FACTOR IN THE SUCCESS OF E-COMMERCE DUE TO THE EMERGENCE OF NEW TECHNOLOGIES AND THE INCREASED USE OF VARIOUS MOBILE DEVICES. HOWEVER, THE PERCENTAGE OF CONSUMERS USING OR CONTINUING TO USE MOBILE PAYMENTS IN MOROCCO IS TOO LOW, WITH 2.44 MILLION M-WALLETS BY THE END OF 2020. IN THIS CHAPTER, WE PRESENT AN OVERVIEW OF THE EVOLUTION OF TECHNOLOGIES USED IN MO…		10.1201/9781032667478-37		ADVANCES IN EMERGING FINANCIAL TECHNOLOGY AND DIGITAL MONEY	ENGLISH	0		CRC PRESS	ISI	CARTOGRAPHY OF MOBILE PAYMENT TECHNOLOGIES USED IN MOROCCO	BOOK CHAPTER		2024	KHOURDIFI YOUNESS;HANSALI ABDERRAHIM	ADVANCES IN EMERG FINANCIAL TECHNOLOGY AND DIGITAL MONEY	none	SULTAN MOULAY SLIMANE UNIVERSITY;CADI AYYAD UNIVERSITY	SULTAN MOULAY SLIMANE UNIVERSITY;CADI AYYAD UNIVERSITY		KHOURDIFI Y, 2024, ADVANCES IN EMERG FINANCIAL TECHNOLOGY AND DIGITAL MONEY	KHOURDIFI Y, 2024, ADVANCES IN EMERG FINANCIAL TECHNOLOGY AND DIGITAL MONEY	MOROCCO	KHOURDIFI Y, 2024,	wos
PEDDIBHOTLA U;CHANDRAN S;KUMAR P;KUMAR R	AND BLOCKCHAIN; DIGITAL WALLET; NFC; SELF-SOVEREIGN IDENTITY (SSI)	AUTHENTICATION; NEAR FIELD COMMUNICATION; SUPPLY CHAIN MANAGEMENT; AGRICULTURAL SUPPLY CHAINS; AND BLOCKCHAIN; BLOCK-CHAIN; COUNTERFEIT PRODUCTS; CROP PROTECTION PRODUCTS; DIGITAL WALLETS; NEAR-FIELD COMMUNICATION; PRODUCT LAYER; SELF-SOVEREIGN IDENTITY; VARIOUS FUNCTIONS; BLOCKCHAIN	SRM UNIVERSITY, DEPARTMENT OF CSE, AP, INDIA; LUT UNIVERSITY, DEPARTMENT OF SOFTWARE ENGINEERING, LAPPEENRANTA, FINLAND	INT. CONF. COMMUN. SYST. NETWORKS, COMSNETS	THE PROLIFERATION OF AGRICULTURAL SUPPLY CHAIN ENCOMPASSES PARTICIPANTS SUCH AS FARMERS, INTERMEDIATE SILOS, TRANSFORMATION PLANTS, AND CLIENTS. MANAGING THIS AGRO-SUPPLY CHAIN INVOLVES VARIOUS FUNCTIONS RELATED TO THE FLOW OF BOTH MATERIALS AND INFORMATION. BEFORE ENTERING THE MARKET, CROP PROTECTION PRODUCTS AND INPUTS UNDERGO RIGOROUS TESTING AND REGULATORY SCRUTINY. DESPITE THESE MEASURES, CO…		10.1109/COMSNETS59351.2024.10427356		2024 16TH INTERNATIONAL CONFERENCE ON COMMUNICATION SYSTEMS AND NETWORKS, COMSNETS 2024	ENGLISH	0		INSTITUTE OF ELECTRICAL AND ELECTRONICS ENGINEERS INC.	ISI	ENHANCED SUPPLY CHAIN MANAGEMENT IN INDIAN AGRICULTURE USING SSI AND BLOCKCHAIN LEVERAGED BY DIGITAL WALLET	CONFERENCE PAPER		2024	PEDDIBHOTLA USHASRI;CHANDRAN SOBIN CHOODAN;KUMAR PRABHAT;KUMAR RANDHIR	INT CONF COMMUN SYST NETWORKS, COMSNETS	none	SRM UNIVERSITY;LUT UNIVERSITY	SRM UNIVERSITY;LUT UNIVERSITY		PEDDIBHOTLA U, 2024, INT CONF COMMUN SYST NETWORKS, COMSNETS	PEDDIBHOTLA U, 2024, INT CONF COMMUN SYST NETWORKS, COMSNETS	FINLAND	PEDDIBHOTLA U, 2024, INT CONF COMMUN SYST NETWORKS,	wos
TAECHARUNGROJ V	GROSS PROVINCIAL PRODUCT; HOUSEHOLD INCOME; REGIONAL DEVELOPMENT; SPATIAL ECONOMETRICS; SPATIAL LAG MODEL; THAILAND		BUSINESS ADMINISTRATION DIVISION, MAHIDOL UNIVERSITY INTERNATIONAL COLLEGE, NAKHON PATHOM, 73170, THAILAND	ECONOMIES	THIS STUDY INVESTIGATES THE IMPACT OF VARIOUS ECONOMIC SECTORS ON HOUSEHOLD INCOME IN THAILAND. IT IS CONDUCTED IN LIGHT OF THE SUBSTANTIAL “DIGITAL WALLET” SCHEME INITIATED BY THE THAI GOVERNMENT, WITH THE GOAL OF PROVIDING EMPIRICAL EVIDENCE AND SUGGESTING ALTERNATIVE POLICIES FOR REGIONAL DEVELOPMENT INFORMED BY SECTORAL AND SPATIAL INSIGHTS. THE RESEARCH AIMS TO DEEPEN THE UNDERSTANDING OF HO…	V. TAECHARUNGROJ; BUSINESS ADMINISTRATION DIVISION, MAHIDOL UNIVERSITY INTERNATIONAL COLLEGE, NAKHON PATHOM, 73170, THAILAND; EMAIL: VIRIYA.TAE@MAHIDOL.EDU	10.3390/economies12020036	22277099	ECONOMIES	ENGLISH	0	2	MULTIDISCIPLINARY DIGITAL PUBLISHING INSTITUTE (MDPI)	ISI	WHICH ECONOMIC SECTORS INFLUENCE AVERAGE HOUSEHOLD INCOME A SPATIAL ECONOMETRIC STUDY OF THAILANDS 76 PROVINCES	ARTICLE	12	2024	TAECHARUNGROJ VIRIYA	ECONOMIES	none	MAHIDOL UNIVERSITY INTERNATIONAL COLLEGE	NOTREPORTED;MAHIDOL UNIVERSITY INTERNATIONAL COLLEGE;NOTREPORTED		TAECHARUNGROJ V, 2024, ECONOMIES	TAECHARUNGROJ V, 2024, ECONOMIES	THAILAND	TAECHARUNGROJ V, 2024,	wos
ATTAR A;SAQIB M;DUBEY S	BLOCKCHAIN; CHARITABLE ORGANIZATION; DIGITAL WALLET; SMART CONTRACTS; ZAKAT		COLLEGE OF BUSINESS, JUMEIRA UNIVERSITY, DUBAI, UNITED ARAB EMIRATES; SCHOOL OF BUSINESS, MANIPAL ACADEMY OF HIGHER EDUCATION, DUBAI CAMPUS, DUBAI, UNITED ARAB EMIRATES	EMERG. APPL. OF BLOCKCHAIN ECHNOL.	ZAKAT IS AN IMPORTANT RELIGIOUS OBLIGATION FOR MUSLIMS, WHICH INVOLVES COLLECTING AND DISTRIBUTING A PORTION OF THEIR WEALTH TO SUPPORT THOSE IN NEED. BLOCKCHAIN TECHNOLOGY CAN PROVIDE AN EFFICIENT AND TRANSPARENT SOLUTION FOR THE COLLECTION AND DISTRIBUTION OF ZAKAT. THE CHAPTER DISCUSSES BLOCKCHAIN TECHNOLOGY'S USE IN THE COLLECTION AND DISTRIBUTION OF ZAKAT. TRUST AND TRANSPARENCY PLAY A VERY …	S. DUBEY; SCHOOL OF BUSINESS, MANIPAL ACADEMY OF HIGHER EDUCATION, DUBAI CAMPUS, DUBAI, UNITED ARAB EMIRATES; EMAIL: SUCHI.DUBEY@MANIPALDUBAI.COM			EMERGING APPLICATIONS OF BLOCKCHAIN TECHNOLOGY	ENGLISH	0		NOVA SCIENCE PUBLISHERS, INC.	ISI	BLOCKCHAINBASED COLLECTION AND DISTRIBUTION OF ZAKAT	BOOK CHAPTER		2023	ATTAR ARIF;SAQIB MUHAMMED;DUBEY SUCHI	EMERG APPL OF BLOCKCHAIN ECHNOL	none	JUMEIRA UNIVERSITY;SCHOOL OF BUSINESS	NOTREPORTED;SCHOOL OF BUSINESS;NOTREPORTED		ATTAR A, 2023, EMERG APPL OF BLOCKCHAIN ECHNOL	ATTAR A, 2023, EMERG APPL OF BLOCKCHAIN ECHNOL	UNITED ARAB EMIRATES	ATTAR A, 2023,	wos
CHAWLA D;JOSHI H	ATTITUDE; EASE OF USE; FACILITATING CONDITIONS; INDIA; INTENTION; LIFESTYLE COMPATIBILITY; MEDIATION; MOBILE WALLET; PERCEIVED USEFULNESS; SECURITY; TRUST		INTERNATIONAL MANAGEMENT INSTITUTE, NEW DELHI, INDIA	GLOBAL BUS. REV.	THE PURPOSE OF THIS ARTICLE IS TO EXPLORE THE MEDIATING ROLE OF PERCEIVED USEFULNESS, TRUST AND ATTITUDE ON A USER’S INTENTION TOWARDS USE OF MOBILE WALLETS IN INDIA. WHILE MEDIATION HAS BEEN STUDIED BY EARLIER RESEARCHERS IN THE CONTEXT OF ONLINE COMMERCE, MOBILE BANKING, SHORT MESSAGE SERVICE (SMS) BANKING, MOBILE MONEY, ETC., NOT MANY STUDIES EXIST IN THE CONTEXT OF MOBILE WALLETS. CONSIDERING…	H. JOSHI; INTERNATIONAL MANAGEMENT INSTITUTE, NEW DELHI, INDIA; EMAIL: HIMANSHU@IMI.EDU	10.1177/0972150920924506	09721509	GLOBAL BUSINESS REVIEW	ENGLISH	50	4	SAGE PUBLICATIONS INDIA PVT. LTD	ISI	ROLE OF MEDIATOR IN EXAMINING THE INFLUENCE OF ANTECEDENTS OF MOBILE WALLET ADOPTION ON ATTITUDE AND INTENTION	ARTICLE	24	2023	CHAWLA DEEPAK;JOSHI HIMANSHU	GLOBAL BUS REV	none	INTERNATIONAL MANAGEMENT INSTITUTE	NOTREPORTED;INTERNATIONAL MANAGEMENT INSTITUTE;NOTREPORTED		CHAWLA D, 2023, GLOBAL BUS REV	CHAWLA D, 2023, GLOBAL BUS REV	INDIA	CHAWLA D, 2023,	wos
LEIJNSE P;SCHEERS M	DIGITAL CREDENTIALS; DIGITAL WALLETS; EUROPEAN IDENTITY FRAMEWORK; FLEXIBLE LEARNING; GOVERNANCE; INTEROPERABILITY; LIFE-LONG LEARNING; STANDARDS	E-LEARNING; ECOSYSTEMS; ELECTRONIC DOCUMENT IDENTIFICATION SYSTEMS; DIGITAL CREDENTIALS; DIGITAL IDENTITY; DIGITAL WALLETS; EDUCATIONAL INSTITUTIONS; EDUCATIONAL SECTORS; EUROPEAN COMMISSION; EUROPEAN IDENTITY FRAMEWORK; FLEXIBLE LEARNING; GOVERNANCE; LIFE LONG LEARNING; INTEROPERABILITY	SURF, NETHERLANDS	EPIC SRE. COMP.	THE EUROPEAN COMMISSION AND THE EDUCATIONAL SECTOR ARE SIMULTANEOUSLY WORKING ON INNOVATIVE CONCEPTS THAT INVOLVE CREDENTIALS AND WALLETS. THE EU HAS HIGH AMBITIONS TO CREATE A DIGITAL IDENTITY ECOSYSTEM, WHILE EDUCATIONAL INSTITUTIONS ARE EXPLORING WAYS TO USE CREDENTIALS TO SUPPORT FLEXIBLE AND LIFE-LONG LEARNING. BOTH INITIATIVES SHARE SIMILAR TERMINOLOGY, TECHNOLOGY AND STANDARDS. ALSO, COMMO…		10.29007/w9rq	23987340	EPIC SERIES IN COMPUTING	ENGLISH	0		EASYCHAIR	ISI	THE NEED FOR SECTORAL OWNERSHIP TO STEER DEVELOPMENTS OF THE EUROPEAN DIGITAL IDENTITY WALLET FOR THE BENEFIT OF EDUCATION	CONFERENCE PAPER	95	2023	LEIJNSE PETER;SCHEERS MENNO	EPIC SRE COMP	none		NOTREPORTED		LEIJNSE P, 2023, EPIC SRE COMP	LEIJNSE P, 2023, EPIC SRE COMP	NETHERLANDS	LEIJNSE P, 2023,	wos
ZLATI G	BLOCKCHAIN; CYBERCRIME; DIGITAL WALLET; SEED PHRASE; VIRTUAL CURRENCY		CLUJ BAR, CLUJ-NAPOCA, ROMANIA; FACULTY OF LAW AND SOCIAL SCIENCES, ‘1 DECEMBRIE 1918’ UNIVERSITY, ALBA IULIA, ROMANIA	ERA FORUM	THE BROAD ADOPTION OF BLOCKCHAIN AND DLTS EMPHASIZES THE POTENTIAL OF A PARADIGM SHIFT NOT ONLY IN THE FINANCIAL MARKETS, BUT ALSO IN THE MODUS OPERANDI OF THE PERPETRATORS. THUS, IT IS OF UTMOST IMPORTANCE FOR LAW PRACTITIONERS TO UNDERSTAND THE RELEVANT TERMINOLOGY AND THE TECHNICAL ASPECTS REGARDING BLOCKCHAIN, VIRTUAL CURRENCIES, DIGITAL WALLETS, PUBLIC ADDRESSES, SEED PHRASES, ETC. LIKEWISE,…	G. ZLATI; CLUJ BAR, CLUJ-NAPOCA, ROMANIA; EMAIL: ZLATI.GEORGE@UAB.RO	10.1007/s12027-023-00759-4	16123093	ERA FORUM	ENGLISH	0	2	SPRINGER SCIENCE AND BUSINESS MEDIA DEUTSCHLAND GMBH	ISI	BLOCKCHAIN AND CRIMINAL LAW THE FUNDAMENTALS	ARTICLE	24	2023	ZLATI GEORGE	ERA FORUM	none	FACULTY OF LAW AND SOCIAL SCIENCES	NOTREPORTED;NOTREPORTED;NOTREPORTED		ZLATI G, 2023, ERA FORUM	ZLATI G, 2023, ERA FORUM	ROMANIA	ZLATI G, 2023,	wos
GUPTA R;KHURANA R;PRASHAANT A	APPLICATION PROGRAMMING INTERFACE; FINTECH; INNOVATIVE BUSINESS MODELS; MOBILE WALLETS; OPEN BANKING; SCIENTOMETRIC ANALYSIS	ACADEMIC COMMUNITY; APPLICATIONS PROGRAMMING INTERFACES; BANKING IS; BUSINESS MODELS; FINANCIAL SERVICE; INNOVATIVE BUSINESS MODEL; MOBILE WALLET; OPEN BANKING; RESEARCH AGENDA; SCIENTOMETRIC ANALYSIS; APPLICATION PROGRAMMING INTERFACES (API)	INSTITUTE OF MANAGEMENT TECHNOLOGY (IMT), UTTAR PRADESH, GHAZIABAD, INDIA; TAMIL NADU, TIRUCHIRAPPALLI, INDIA	ELECTRON. COMMER. RES.	OPEN BANKING IS AN EMERGING AND EVOLVING CONCEPT, IT BRINGS BOTH OPPORTUNITIES AND CHALLENGES TO BANKS. DESPITE ITS ANTICIPATED TRANSFORMATIVE ROLE IN CHANGING THE FINANCIAL SERVICES LANDSCAPE AND DELIVERING SUPERIOR VALUE TO THE CUSTOMERS, THE CONCEPT HAS BEEN UNDER-EXAMINED IN THE ACADEMIC COMMUNITY. THIS STUDY SYNTHESIZES EXISTING RESEARCH ON OPEN BANKING AND ITS EMERGING ROLE. IT EMPLOYS SCIE…	R. KHURANA; INSTITUTE OF MANAGEMENT TECHNOLOGY (IMT), UTTAR PRADESH, GHAZIABAD, INDIA; EMAIL: RKHURANA@IMT.EDU	10.1007/s10660-023-09722-4	13895753	ELECTRONIC COMMERCE RESEARCH	ENGLISH	1	1	SPRINGER	ISI	OPEN BANKING ON THE HORIZON A SCIENTOMETRIC ANALYSIS AND RESEARCH AGENDA	ARTICLE	24	2024	GUPTA RAKESH;KHURANA REEMA;PRASHAANT ANU	ELECTRON COMMER RES	none	INSTITUTE OF MANAGEMENT TECHNOLOGY (IMT)	NOTREPORTED;INSTITUTE OF MANAGEMENT TECHNOLOGY (IMT);NOTREPORTED		GUPTA R, 2024, ELECTRON COMMER RES	GUPTA R, 2024, ELECTRON COMMER RES	INDIA	GUPTA R, 2024,	wos
ZAIDAN H;SHISHAN F;AL-HASAN M;AL-MAWALI H;MOWAFI O;DAHIYAT S	CONTINUOUS INTENTION; E-WALLET; ENVIRONMENTAL CONCERN; ENVIRONMENTAL KNOWLEDGE; ENVIRONMENTAL RESPONSIBILITY; THEORY OF PLANNED BEHAVIOR		DEPARTMENT OF ACCOUNTING, THE UNIVERSITY OF JORDAN, AMMAN, JORDAN; DEPARTMENT OF MARKETING, THE UNIVERSITY OF JORDAN, AMMAN, JORDAN; DEPARTMENT OF ACCOUNTING, THE HASHEMITE UNIVERSITY, ZARQA, JORDAN; DEPARTMENT OF BUSINESS MANAGEMENT, THE UNIVERSITY OF JORDAN, AMMAN, JORDAN	COMPET. REV.	PURPOSE: THIS STUDY AIMS TO INVESTIGATE THE MODERATING IMPACT OF ENVIRONMENTAL KNOWLEDGE ON THE FACTORS INFLUENCING INDIVIDUALS’ CONTINUOUS INTENTION TO USE E-WALLETS. DESIGN/METHODOLOGY/APPROACH: USING A QUANTITATIVE RESEARCH DESIGN, THIS STUDY DEVELOPS AND EMPIRICALLY TESTS A STRUCTURAL MODEL. A PURPOSIVE SAMPLE OF 344 E-WALLET USERS IN JORDAN WAS ANALYZED USING SMART-PLS SOFTWARE. FINDINGS: TH…	F. SHISHAN; DEPARTMENT OF MARKETING, THE UNIVERSITY OF JORDAN, AMMAN, JORDAN; EMAIL: F.SHISHAN@JU.EDU.JO	10.1108/CR-11-2023-0279	10595422	COMPETITIVENESS REVIEW	ENGLISH	0		EMERALD PUBLISHING	ISI	CASH OR CASHLESS EXPLORING THE DETERMINANTS OF CONTINUOUS INTENTION TO USE EWALLETS THE MODERATING ROLE OF ENVIRONMENTAL KNOWLEDGE	ARTICLE		2024	ZAIDAN HALA;SHISHAN FARAH;AL-HASAN MELINA;AL-MAWALI HAMZAH;MOWAFI OMAR;DAHIYAT SAMER EID	COMPET REV	none	THE UNIVERSITY OF JORDAN;THE UNIVERSITY OF JORDAN;THE HASHEMITE UNIVERSITY;THE UNIVERSITY OF JORDAN	NOTREPORTED;THE UNIVERSITY OF JORDAN;NOTREPORTED		ZAIDAN H, 2024, COMPET REV	ZAIDAN H, 2024, COMPET REV	JORDAN	ZAIDAN H, 2024,	wos
ZAID K A;KAKEESH D;AL-WESHAH G;AL-DEBEI M	CONTINUED USAGE BEHAVIOR; CONTINUED USAGE INTENTION; E-WALLET ADOPTION; EXTENDED UTAUT2; JORDAN; M-PAYMENT; SEM; SMART-PLS; TRUST		DEPARTMENT OF MARKETING, SCHOOL OF BUSINESS, THE UNIVERSITY OF JORDAN, AMMAN, 11192, JORDAN; DEPARTMENT OF MARKETING, FACULTY OF BUSINESS, AL-BALQA APPLIED UNIVERSITY, JORDAN; DEPARTMENT OF MANAGEMENT INFORMATION SYSTEMS, SCHOOL OF BUSINESS, THE UNIVERSITY OF JORDAN, AMMAN, 11192, JORDAN; HOURANI CENTER FOR APPLIED SCIENTIFIC RESEARCH, AL-AHLIYYA AMMAN UNIVERSITY, AMMAN, JORDAN	J. OPEN INNOV.: TECHNOL. MARK. COMPLEX.	THE MOBILE MARKETING IS FACING RAPID TECHNOLOGICAL ADVANCEMENT NOWADAYS, AND THERE IS GROWING LITERATURE ON THE EFFECTS OF MOBILE APPLICATIONS, HOWEVER, THE ROLE OF BRANDED APPLICATIONS IN INFLUENCING CONSUMER ADOPTION REMAINS INSUFFICIENTLY EXPLORED. THUS, THIS STUDY AIMS TO MEASURE THE LEVEL TO WHICH THE UNIFIED THEORY OF ACCEPTANCE AND USE OF TECHNOLOGY 2 (UTAUT2) VARIABLES CAN AFFECT THE ADOP…	D.F. KAKEESH; DEPARTMENT OF MARKETING, SCHOOL OF BUSINESS, THE UNIVERSITY OF JORDAN, AMMAN, 11192, JORDAN; EMAIL: DANA.KAKEESH@JU.EDU.JO	10.1016/j.joitmc.2023.100113	21998531	JOURNAL OF OPEN INNOVATION: TECHNOLOGY, MARKET, AND COMPLEXITY	ENGLISH	9	3	ELSEVIER B.V.	ISI	CONSUMER POSTADOPTION OF EWALLET AN EXTENDED UTAUT2 PERSPECTIVE WITH TRUST	ARTICLE	9	2023	ZAID KILANI ABD AL-HALEEM;KAKEESH DANA F;AL-WESHAH GHAZI A;AL-DEBEI MUTAZ M	J OPEN INNOV: TECHNOL MARK COMPLEX	none	THE UNIVERSITY OF JORDAN;AL-BALQA APPLIED UNIVERSITY;THE UNIVERSITY OF JORDAN;AL-AHLIYYA AMMAN UNIVERSITY	NOTREPORTED;THE UNIVERSITY OF JORDAN;NOTREPORTED		ZAID KILANI AAH, 2023, J OPEN INNOV: TECHNOL MARK COMPLEX	ZAID KILANI AAH, 2023, J OPEN INNOV: TECHNOL MARK COMPLEX	JORDAN	ZAID KILANI AAH, 2023,	wos
ALBARQ A	E-WALLET; MOBILE PAYMENT; REIMBURSEMENT CONDITION; RIYADH; TAM		MANAGEMENT DEPARTMENT, SCHOOL OF BUSINESS, KING FAISAL UNIVERSITY, AL-AHSA, SAUDI ARABIA	J. ISLAM. MARK.	PURPOSE: THIS STUDY AIMS TO SCRUTINIZE EXISTING END-USER COMPREHENSION REGARDING E-WALLET TECHNOLOGY THROUGH AN EXAMINATION OF APPARENT USEFULNESS, EASE OF USE AND LEVELS OF TRUST, AND HOW THESE FACTORS MAY INFLUENCE A CONSUMER’S ATTITUDES TOWARD THE ADOPTION OF THIS NEW PAYMENT METHOD. DESIGN/METHODOLOGY/APPROACH: THE QUOTA SAMPLING METHOD WAS USED, AND RESIDENTS OVER THE AGE OF 22 YEARS WERE TA…	A. ALBARQ; MANAGEMENT DEPARTMENT, SCHOOL OF BUSINESS, KING FAISAL UNIVERSITY, AL-AHSA, SAUDI ARABIA; EMAIL: AALBARG@KFU.EDU.SA	10.1108/JIMA-02-2023-0052	17590833	JOURNAL OF ISLAMIC MARKETING	ENGLISH	0		EMERALD PUBLISHING	ISI	THE EMERGENCE OF MOBILE PAYMENT ACCEPTANCE IN SAUDI ARABIA THE ROLE OF REIMBURSEMENT CONDITION	ARTICLE		2024	ALBARQ ABBAS	J ISLAM MARK	none	KING FAISAL UNIVERSITY	NOTREPORTED;KING FAISAL UNIVERSITY;NOTREPORTED		ALBARQ A, 2024, J ISLAM MARK	ALBARQ A, 2024, J ISLAM MARK	SAUDI ARABIA	ALBARQ A, 2024,	wos
GEORGE A;SUNNY P	CONTINUANCE INTENTION; COVID-19; INFORMATION SYSTEMS SUCCESS MODEL; MOBILE WALLETS; TECHNOLOGY ACCEPTANCE MODEL (TAM)		RESEARCH AND PG DEPARTMENT OF COMMERCE, MARIAN COLLEGE KUTTIKKANAM (AUTONOMOUS), PEERMADE, 685531, INDIA; DEPARTMENT OF COMMERCE, KURIAKOSE ELIAS COLLEGE MANNANAM, KOTTAYAM, INDIA	J. FINAN. SERV. MARK.	THIS PAPER AIMS TO FORMULATE AND TEST A COMPREHENSIVE MODEL BY INTEGRATING THE STRENGTHS OF THE TAM AND IS SUCCESS MODEL AND THE ADDITION OF TWO CONSTRUCTS, NAMELY PROMOTIONAL OFFERS AND SITUATIONAL INFLUENCE, TO EXPLAIN THE CONTINUED USAGE INTENTION OF MOBILE WALLETS. USING AN ONLINE SURVEY, DATA WERE GATHERED FROM 588 MOBILE WALLET USERS WHO HAD PRIOR EXPERIENCE USING MOBILE WALLETS FOR MORE TH…	A. GEORGE; RESEARCH AND PG DEPARTMENT OF COMMERCE, MARIAN COLLEGE KUTTIKKANAM (AUTONOMOUS), PEERMADE, 685531, INDIA; EMAIL: AJIMON.GEORGE@MARIANCOLLEGE.ORG	10.1057/s41264-022-00174-9	13630539	JOURNAL OF FINANCIAL SERVICES MARKETING	ENGLISH	19	4	PALGRAVE MACMILLAN	ISI	WHY DO PEOPLE CONTINUE USING MOBILE WALLETS AN EMPIRICAL ANALYSIS AMID COVID19 PANDEMIC	ARTICLE	28	2023	GEORGE AJIMON;SUNNY PRAJOD	J FINAN SERV MARK	none	MARIAN COLLEGE KUTTIKKANAM (AUTONOMOUS);KURIAKOSE ELIAS COLLEGE MANNANAM	NOTREPORTED;MARIAN COLLEGE KUTTIKKANAM (AUTONOMOUS);EMAIL: AJIMON.GEORGE@MARIANCOLLEGE.ORG		GEORGE A, 2023, J FINAN SERV MARK	GEORGE A, 2023, J FINAN SERV MARK	INDIA	GEORGE A, 2023,	wos
OEMAR H;ALIFANI U;ORGIANUS Y	KANO; PHILANTHROPIC INSTITUTIONS; QUALITY FUNCTION DEPLOYMENT; SERVICE QUALITY; SERVQUAL		INDUSTRIAL ENGINEERING UNIVERSITAS ISLAM BANDUNG, JL. TAMAN SARI 1, BANDUNG, 40116, INDONESIA	ACTA LOGISTICA	ZAKAT PHILANTHROPIC INSTITUTIONS HAVE A PIVOTAL ROLE IN FUND COLLECTION AND DISTRIBUTION, YET THEY HAVEN'T REALIZED THEIR FULL POTENTIAL PRIMARILY DUE TO DIMINISHED PUBLIC TRUST. ADDRESSING THIS CHALLENGE REQUIRES STRATEGIES TO ELEVATE SERVICE QUALITY. THIS STUDY INTRODUCES AN INTEGRATED METHOD COMBINING SERVQUAL, KANO, AND QUALITY FUNCTION DEPLOYMENT (QFD) TO OPTIMIZE ZAKAT SERVICE QUALITY. OUT …	Y. ORGIANUS; INDUSTRIAL ENGINEERING UNIVERSITAS ISLAM BANDUNG, BANDUNG, JL. TAMAN SARI 1, 40116, INDONESIA; EMAIL: YORGIANUS@YAHOO.CO.ID	10.22306/al.v11i1.446	13395629	ACTA LOGISTICA	ENGLISH	0	1	4S GO, S.R.O	ISI	STRATEGIC ENHANCEMENT OF ZAKAT COLLECTION AND DISTRIBUTION IN PHILANTHROPIC INSTITUTIONS INTEGRATION OF SERVQUAL KANO AND QFD	REVIEW	11	2024	OEMAR HIRAWATI;ALIFANI ULIMA;ORGIANUS YAN	ACTA LOGISTICA	none	INDUSTRIAL ENGINEERING UNIVERSITAS ISLAM BANDUNG	NOTREPORTED;INDUSTRIAL ENGINEERING UNIVERSITAS ISLAM BANDUNG;NOTREPORTED		OEMAR H, 2024, ACTA LOGISTICA	OEMAR H, 2024, ACTA LOGISTICA	INDONESIA	OEMAR H, 2024,	wos
KASIM R;ZULAZLI N;AZMAN W	FINTECH; ISLAMIC FINTECH; LEADERSHIP; MALAYSIA; SUSTAINABLE ENTREPRENEURSHIP VALUES; TECHNOLOGY ADOPTION		UNIVERSITI MALAYSIA KELANTAN, KELANTAN, KOTA BHARU, 16100, MALAYSIA	INT. J. RELIG.	THE PRIMARY OBJECTIVES OF THIS PAPER ARE TO EXAMINE IF ISLAMIC FINTECH LEADERSHIP (IFL) AND TECHNOLOGY ADOPTION (TA) CAN PREDICT SUSTAINABLE ENTREPRENEURSHIP VALUES (SEV) AMONG MALAYSIAN FINTECH ORGANIZATIONS. A SURVEY WAS SELF-ADMINISTERED TO 294 ORGANISATIONS INVOLVED IN PAYMENT, E-WALLET, PROP-TECH, DIGITAL BANK, BLOCKCHAIN, CRYPTOCURRENCY, REMITTANCE, AI/DATA, MARKETPLACE, CROWDFUNDING, INSUR…		10.61707/9e0gfj82	2633352X	INTERNATIONAL JOURNAL OF RELIGION	ENGLISH	0	3	TRANSNATIONAL PRESS LONDON LTD	ISI	DO ISLAMIC FINTECH LEADERSHIP AND TECHNOLOGY ADOPTION PREDICT SUSTAINABLE ENTREPRENEURSHIP VALUES AMONG FINTECH ORGANIZATIONS	ARTICLE	5	2024	KASIM RAJA SUZANA RAJA;ZULAZLI NURUL AFIQAH;AZMAN WAN FARIZA AZIMA CHE	INT J RELIG	none	UNIVERSITI MALAYSIA KELANTAN	UNIVERSITI MALAYSIA KELANTAN		KASIM RSR, 2024, INT J RELIG	KASIM RSR, 2024, INT J RELIG	MALAYSIA	KASIM RSR, 2024,	wos
KAPOOR A;SINDWANI R;GOEL M	DEMATEL; INHIBITORS; ISM-MICMAC; MOBILE WALLET; UNORGANISED RETAILERS		J. C. BOSE UNIVERSITY OF SCIENCE AND TECHNOLOGY, YMCA, FARIDABAD, INDIA	J. FINAN. SERV. MARK.	THE SUCCESS OF MOBILE WALLET (M-WALLET) IN DEVELOPING COUNTRIES DEPENDS UPON A GREAT EXTENT TO ITS ADOPTION AMONG UNORGANISED RETAILERS. THE ADOPTION AMONG THEM IS STILL IN ITS NASCENT STAGE DUE TO PRESENCE OF VARIOUS INHIBITORS. USING INNOVATION RESISTANCE THEORY AS UNDERPINNING THEORY, THIS PIONEER STUDY ATTEMPTS TO IDENTIFY AN EXHAUSTIVE SET OF M-WALLET ADOPTION INHIBITORS AMONG UNORGANISED RE…	A. KAPOOR; J. C. BOSE UNIVERSITY OF SCIENCE AND TECHNOLOGY, YMCA, FARIDABAD, INDIA; EMAIL: ASHWARYAKAPOOR@YAHOO.COM	10.1057/s41264-024-00277-5	13630539	JOURNAL OF FINANCIAL SERVICES MARKETING	ENGLISH	0		PALGRAVE MACMILLAN	ISI	DECODING THE CONUNDRUM EXPLORING COMPLEX INTERLINKAGES BETWEEN MOBILE WALLET ADOPTION INHIBITORS AMONG UNORGANISED RETAILERS	ARTICLE		2024	KAPOOR ASHWARYA;SINDWANI RAJIV;GOEL MANISHA	J FINAN SERV MARK	none	J. C. BOSE UNIVERSITY OF SCIENCE AND TECHNOLOGY	NOTREPORTED;J. C. BOSE UNIVERSITY OF SCIENCE AND TECHNOLOGY;NOTREPORTED		KAPOOR A, 2024, J FINAN SERV MARK	KAPOOR A, 2024, J FINAN SERV MARK	INDIA	KAPOOR A, 2024,	wos
SUTTICHERCHART J;RAKTHIN S	ADOPTION; BIBLIOMETRIC REVIEW; DIGITAL WALLET; STATUS QUO BIAS; SUPER APP; UNIFIED THEORY OF ACCEPTANCE AND USE OF TECHNOLOGY		COLLEGE OF MANAGEMENT, MAHIDOL UNIVERSITY, BANGKOK, THAILAND	MANAGE. MARK.	AS MANY COMPANIES ARE TRANSFORMING THROUGH DIGITALISATION TO INCREASE EFFICIENCY AND EFFECTIVENESS OF BUSINESS PROCESSES, FINANCIAL TECHNOLOGY FIRMS INNOVATED THE DIGITAL WALLET AS AN OMNICHANNEL PAYMENT TO FACILITATE THE DIGITAL PAYMENTS. THIS REVIEW AIMS TO EXPLORE THE CONCEPTUAL STRUCTURE OF THE DIGITAL WALLET KNOWLEDGE BASE IN BUSINESS AND MANAGEMENT LITERATURE AND THE DETERMINANTS THAT INFLU…		10.2478/mmcks-2023-0015	18420206	MANAGEMENT AND MARKETING	ENGLISH	1	3	SCIENDO	ISI	DETERMINANTS OF DIGITAL WALLET ADOPTION AND SUPER APP A REVIEW AND RESEARCH MODEL	ARTICLE	18	2023	SUTTICHERCHART JUTHATIP;RAKTHIN SIRISUHK	MANAGE MARK	none	MAHIDOL UNIVERSITY	MAHIDOL UNIVERSITY		SUTTICHERCHART J, 2023, MANAGE MARK	SUTTICHERCHART J, 2023, MANAGE MARK	THAILAND	SUTTICHERCHART J, 2023,	wos
KAPOOR A;SINDWANI R;GOEL M	FUZZY TOPSIS; MOBILE WALLET DOMINANT THEMES; MOBILE WALLETS; PRIORITIZATION; REVIEW; SERVICE QUALITY		J. C. BOSE UNIVERSITY OF SCIENCE & TECHNOLOGY, YMCA, HARYANA, FARIDABAD, INDIA	GLOBAL BUS. REV.	MOBILE WALLETS (M-WALLET) HAVE PLAYED A PROMINENT ROLE IN CHANGING OUR SYSTEM OF PAYMENT FROM CASH TO DIGITAL PAYMENT. THE CURRENT STUDY EMPLOYS A SYSTEMATIC REVIEW OF ARTICLES PUBLISHED ON M-WALLETS BETWEEN JANUARY 2008 AND JANUARY 2020. TO IDENTIFY THE RELEVANT STUDIES, RESEARCH DATABASES ARE SEARCHED USING DIFFERENT KEYWORDS. RESEARCH ARTICLES PUBLISHED ON M-WALLETS ARE SELECTED BASED ON PARTI…	A. KAPOOR; J. C. BOSE UNIVERSITY OF SCIENCE & TECHNOLOGY, YMCA, FARIDABAD, HARYANA, INDIA; EMAIL: RAJIV_SINDWANI@YAHOO.CO.IN	10.1177/0972150920961254	09721509	GLOBAL BUSINESS REVIEW	ENGLISH	18	2	SAGE PUBLICATIONS INDIA PVT. LTD	ISI	MOBILE WALLETS THEORETICAL AND EMPIRICAL ANALYSIS	ARTICLE	25	2024	KAPOOR ASHWARYA;SINDWANI RAJIV;GOEL MANISHA	GLOBAL BUS REV	none	J. C. BOSE UNIVERSITY OF SCIENCE AND TECHNOLOGY	NOTREPORTED;J. C. BOSE UNIVERSITY OF SCIENCE AND TECHNOLOGY;NOTREPORTED		KAPOOR A, 2024, GLOBAL BUS REV	KAPOOR A, 2024, GLOBAL BUS REV	INDIA	KAPOOR A, 2024,	wos
TANG W;LI C;MAK S;WONG E	BLOCKCHAIN; DATA MANAGEMENT; JEWELRY INDUSTRY; SUPPLY CHAIN	BLOCKCHAIN; ELECTRONIC DATA INTERCHANGE; INFORMATION MANAGEMENT; BLOCK-CHAIN; DIGITAL WALLETS; JEWELLERY INDUSTRY; SUBSTANTIAL INVESTMENTS; TECHNOLOGICAL EVOLUTION; SUPPLY CHAINS	SCHOOL OF SCIENCE AND TECHNOLOGY, HONG KONG METROPOLITAN UNIVERSITY, HO MAN TIN, HONG KONG; VOCATIONAL TRAINING COUNCIL, MORRISON HILL, HONG KONG	LECT. NOTES NETWORKS SYST.	BLOCKCHAIN IS GAINING PROMINENCE ON THE MARKET, AND VIRTUALLY, EVERY INDUSTRY APPEARS EAGER TO UTILIZE THIS TECHNOLOGY FOR ITS BENEFITS. IT IS ESSENTIAL TO RECOGNIZE THAT THE INITIAL STAGE OF ANY OPPORTUNITY IS DIFFICULT. SMALL BRANDS FREQUENTLY ENCOUNTER OBSTACLES, AND SOME OF THEM HAVE REPORTEDLY QUESTIONED THE VERACITY OF BLOCKCHAIN TECHNOLOGY AT ONE POINT. IN ADDITION, BLOCKCHAIN IN THE JEWEL…	W.F. TANG; SCHOOL OF SCIENCE AND TECHNOLOGY, HONG KONG METROPOLITAN UNIVERSITY, HO MAN TIN, HONG KONG; EMAIL: FWFTANG@HKMU.EDU.HK	10.1007/978-981-99-7886-1_29	23673370	LECTURE NOTES IN NETWORKS AND SYSTEMS	ENGLISH	0		SPRINGER SCIENCE AND BUSINESS MEDIA DEUTSCHLAND GMBH	ISI	ENHANCING DATA EXCHANGE TRUST IN THE JEWELRY INDUSTRY WITH BLOCKCHAIN TECHNOLOGY	CONFERENCE PAPER	817	2024	TANG WF;LI CH;MAK SL;WONG ESW	LECT NOTES NETWORKS SYST	none	HONG KONG METROPOLITAN UNIVERSITY;VOCATIONAL TRAINING COUNCIL	NOTREPORTED;HONG KONG METROPOLITAN UNIVERSITY;NOTREPORTED		TANG WF, 2024, LECT NOTES NETWORKS SYST	TANG WF, 2024, LECT NOTES NETWORKS SYST	HONG KONG	TANG WF, 2024,	wos
HADI R R	BUSINESS STRATEGY; CULTURAL FACTORS; CUSTOMER EXPERIENCE; CUSTOMER LOYALTY; PLS STRUCTURAL EQUATION MODELING		UNIVERSITAS PEMBANGUNAN NASIONAL VETERAN JATIM, SURABAYA, INDONESIA	REV.	INDONESIA STANDS AS A COLOSSUS IN THE DIGITAL PAYMENT FRONTIER, BOASTING THE LARGEST MARKET IN SOUTHEAST ASIA WITH A STAGGERING 92 MILLION USERS IN 2020 ALONE AND A TRANSACTION VALUE ECLIPSING 18.7 BILLION US DOLLARS. IT’S WITHIN THIS VIBRANT BACKDROP THAT OUR RESEARCH UNRAVELS THE ENIGMA OF GEN Z, THE DIGITAL-NATIVE COHORT SWIFTLY COMMANDEERING THESE PLATFORMS. RIDING THE WAVE OF E-WALLET DOMINA…	R.J. HADI RAHARJO; UNIVERSITAS PEMBANGUNAN NASIONAL VETERAN JATIM, SURABAYA, INDONESIA; EMAIL: RADEN.JOHNNY.MA@UPNJATIM.AC.ID	10.33788/rcis.83.13	15833410	REVISTA DE CERCETARE SI INTERVENTIE SOCIALA	ENGLISH	0		EDITURA LUMEN	ISI	THE GEN ZS DIGITAL PAYMENT LOYALTY IN INDONESIA	ARTICLE	83	2023	HADI RAHARJO RADEN JOHNNY	REV	none	UNIVERSITAS PEMBANGUNAN NASIONAL VETERAN JATIM	NOTREPORTED;UNIVERSITAS PEMBANGUNAN NASIONAL VETERAN JATIM;NOTREPORTED		HADI RAHARJO RJ, 2023, REV	HADI RAHARJO RJ, 2023, REV	INDONESIA	HADI RAHARJO RJ, 2023,	wos
VERONICA V;OETAMA R;RAMADHAN A	ADVANCED ENCRYPTION STANDARD; AGILE METHODOLOGY; ALGORITHM; CREDIT CARDS; PAYMENT GATEWAY SYSTEM; RIVEST-SHAMIR-ADLEMAN		DEPARTMENT OF INFORMATION SYSTEMS, FACULTY OF ENGINEERING AND INFORMATICS, UNIVERSITAS MULTIMEDIA NUSANTARA, TANGERANG, INDONESIA; SCHOOL OF COMPUTING, TELKOM UNIVERSITY, BANDUNG, INDONESIA	TELKOMNIKA TELECOMUN. COMPT. ELECTR. CONTROL	THE RAPID DEVELOPMENT OF TECHNOLOGY HAS LED TO VARIOUS ADVANCEMENTS, INCLUDING THE ABILITY TO CONDUCT ONLINE PAYMENTS THROUGH APPLICATIONS. COMPANIES PROVIDING DIGITAL TRANSACTION PAYMENT SERVICES REQUIRE A PAYMENT GATEWAY SYSTEM AS AN INTERMEDIARY FOR ONLINE TRANSACTIONS. THE SYSTEM ACTS AS AN INTERMEDIARY BETWEEN MERCHANTS WITH DIGITAL WALLETS AND BANKS, INVOLVING THE COMPANY, MERCHANTS, AND BA…	A. RAMADHAN; SCHOOL OF COMPUTING, TELKOM UNIVERSITY, BANDUNG, INDONESIA; EMAIL: ARIEFRAMADHAN@TELKOMUNIVERSITY.AC.ID	10.12928/TELKOMNIKA.v22i3.25578	16936930	TELKOMNIKA (TELECOMMUNICATION COMPUTING ELECTRONICS AND CONTROL)	ENGLISH	0	3	UNIVERSITAS AHMAD DAHLAN	ISI	INCORPORATING RIVESTSHAMIRADLEMAN ALGORITHM AND ADVANCED ENCRYPTION STANDARD IN PAYMENT GATEWAY SYSTEM	ARTICLE	22	2024	VERONICA;OETAMA RAYMOND SUNARDI;RAMADHAN ARIEF	TELKOMNIKA TELECOMUN COMPT ELECTR CONTROL	none	UNIVERSITAS MULTIMEDIA NUSANTARA;TELKOM UNIVERSITY	NOTREPORTED;TELKOM UNIVERSITY;EMAIL: ARIEFRAMADHAN@TELKOMUNIVERSITY.AC.ID		VERONICA V, 2024, TELKOMNIKA TELECOMUN COMPT ELECTR CONTROL	VERONICA V, 2024, TELKOMNIKA TELECOMUN COMPT ELECTR CONTROL	INDONESIA	VERONICA V, 2024,	wos
LE T;NGO T;NGUYEN D;DO T	BANK–FINTECH COOPERATION; COMPARISON FINTECH SECTOR; EMERGING MARKET; PAYMENTS AND MOBILE WALLET SECTOR; RISK-ADJUSTED RETURNS		FACULTY OF FINANCE - BANKING, UNIVERSITY OF ECONOMICS AND LAW, HO CHI MINH CITY, VIET NAM; VIETNAM NATIONAL UNIVERSITY, HO CHI MINH CITY, VIET NAM; INTERNATIONAL CENTRE FOR ECONOMIC ANALYSIS (ICEA), BRAMPTON, CANADA; SCHOOL OF AVIATION, MASSEY UNIVERSITY, PALMERSTON, NEW ZEALAND; UNIVERSITY OF ECONOMICS AND BUSINESS, VIETNAM NATIONAL UNIVERSITY, HANOI, VIET NAM	INT. J. BANK MARK.	PURPOSE: THE FINANCIAL SYSTEM HAS WITNESSED THE SUBSTANTIAL GROWTH OF FINANCIAL TECHNOLOGY (FINTECH) FIRMS. ONE OF THE STRATEGIES THAT BANKS HAVE ADOPTED TO COPE WITH THIS EMERGENCE IS TO COOPERATE WITH FINTECH FIRMS. THIS STUDY EMPIRICALLY INVESTIGATED WHETHER COOPERATION BETWEEN BANKS AND FINTECH COMPANIES WOULD IMPROVE BANKS’ RISK-ADJUSTED RETURNS. DESIGN/METHODOLOGY/APPROACH: WE DEVELOPED A N…	T. LE; FACULTY OF FINANCE - BANKING, UNIVERSITY OF ECONOMICS AND LAW, HO CHI MINH CITY, VIET NAM; EMAIL: TULDQ@UEL.EDU.VN	10.1108/IJBM-09-2023-0525	02652323	INTERNATIONAL JOURNAL OF BANK MARKETING	ENGLISH	0		EMERALD PUBLISHING	ISI	FINTECH AND BANKING FRIENDS ORFOES EVIDENCE FROM BANKFINTECH COOPERATION	ARTICLE		2024	LE TU;NGO THANH;NGUYEN DAT T;DO THUONG TM	INT J BANK MARK	none	UNIVERSITY OF ECONOMICS AND LAW;VIETNAM NATIONAL UNIVERSITY;INTERNATIONAL CENTRE FOR ECONOMIC ANALYSIS (ICEA);MASSEY UNIVERSITY;UNIVERSITY OF ECONOMICS AND BUSINESS	NOTREPORTED;UNIVERSITY OF ECONOMICS AND LAW;NOTREPORTED		LE T, 2024, INT J BANK MARK	LE T, 2024, INT J BANK MARK		LE T, 2024,	wos
HOESS A;LAUTENSCHLAGER J;SEDLMEIR J;FRIDGEN G;SCHLATT V;URBACH N	COOPETITION; DIGITAL IDENTITY; DIGITAL WALLET; MAAS; SELF-SOVEREIGN IDENTITY		INTERDISCIPLINARY CENTRE FOR SECURITY, RELIABILITY AND TRUST, UNIVERSITY OF LUXEMBOURG, LUXEMBOURG, LUXEMBOURG; FRANKFURT UNIVERSITY OF APPLIED SCIENCES, FRANKFURT AM MAIN, GERMANY; BRANCH BUSINESS AND INFORMATION SYSTEMS ENGINEERING OF THE FRAUNHOFER FIT, BAYREUTH, GERMANY; FIM RESEARCH CENTER, UNIVERSITY OF BAYREUTH, BAYREUTH, GERMANY	BUSIN. INFO. SYS. ENG.	WITH GROWING AWARENESS OF SUSTAINABILITY AND CONVENIENCE EXPECTATIONS, CUSTOMERS ARE INCREASINGLY DEMANDING INTEGRATED AND SEAMLESS MOBILITY IN THE FORM OF MOBILITY-AS-A-SERVICE (MAAS). HOWEVER, AS CENTRALIZED MAAS PLATFORMS HAVE THUS FAR FAILED TO INTEGRATE A CRITICAL SHARE OF MOBILITY SERVICE PROVIDERS (MSPS), TRAVELERS LACK OPPORTUNITIES TO EFFICIENTLY COMBINE THE VARIOUS MOBILITY SERVICES REQ…	J. LAUTENSCHLAGER; FRANKFURT UNIVERSITY OF APPLIED SCIENCES, FRANKFURT AM MAIN, GERMANY; EMAIL: JONATHAN.LAUTENSCHLAGER@FIT.FRAUNHOFER.DE	10.1007/s12599-024-00856-9	23637005	BUSINESS AND INFORMATION SYSTEMS ENGINEERING	ENGLISH	0		SPRINGER GABLER	ISI	TOWARD SEAMLESS MOBILITYASASERVICE PROVIDING MULTIMODAL MOBILITY THROUGH DIGITAL WALLETS	ARTICLE		2024	HOESS ALEXANDRA;LAUTENSCHLAGER JONATHAN;SEDLMEIR JOHANNES;FRIDGEN GILBERT;SCHLATT VINCENT;URBACH NILS	BUSIN INFO SYS ENG	none	UNIVERSITY OF LUXEMBOURG;FRANKFURT UNIVERSITY OF APPLIED SCIENCES;UNIVERSITY OF BAYREUTH	J. LAUTENSCHLAGER;FRANKFURT UNIVERSITY OF APPLIED SCIENCES;EMAIL: JONATHAN.LAUTENSCHLAGER@FIT.FRAUNHOFER.DE		HOESS A, 2024, BUSIN INFO SYS ENG	HOESS A, 2024, BUSIN INFO SYS ENG	GERMANY	HOESS A, 2024,	wos
HUSAINAH N;PAULINA J;MISROFINGAH M;PRADIPTA I;MAULANA A;FAHLEVI M	ACTUAL USAGE; ATTITUDE; DIGITAL WALLET; INTENTION; PERCEIVED EASE OF USE; PERCEIVED USEFULNESS; SECURITY; TRUST		FACULTY OF ECONOMICS AND BUSINESS, UNIVERSITAS MUHAMMADIYAH JAKARTA, INDONESIA; MANAGEMENT DEPARTMENT, UNIVERSITAS TAMA JAGAKARSA, JAKARTA, INDONESIA; GLOBAL BUSINESS MARKETING PROGRAM, BINUS BUSINESS SCHOOL, BINA NUSANTARA UNIVERSITY, INDONESIA; MANAGEMENT DEPARTMENT, BINUS BUSINESS SCHOOL, BINA NUSANTARA UNIVERSITY, INDONESIA; MANAGEMENT DEPARTMENT, BINUS ONLINE LEARNING, BINA NUSANTARA UNIVERS…	INT. J. DATA NETW. SCI.	SINCE SMARTPHONES ARE SO COMMON, DIGITAL WALLETS HAVE DEVELOPED SWIFTLY TO FULFILL THE DEMANDS OF A CONTEMPORARY CULTURE THAT PROMOTES MOBILITY AND STREAMLINES TRANSACTION PROCESSES. THIS STUDY'S OBJECTIVE IS TO CLARIFY CONSUMER BEHAVIOR IN INDONESIA'S ADOPTION OF DIGITAL WALLETS. THIS STUDY WAS CARRIED OUT IN JAKARTA INVOLVING 360 RESPONDENTS. THIS STUDY ANALYZES USING A STRUCTURAL EQUATION MODE…	N. HUSAINAH; FACULTY OF ECONOMICS AND BUSINESS, UNIVERSITAS MUHAMMADIYAH JAKARTA, INDONESIA; EMAIL: NAZIFAH.HUSAINAH@UMJ.AC.ID	10.5267/j.ijdns.2022.12.017	25618148	INTERNATIONAL JOURNAL OF DATA AND NETWORK SCIENCE	ENGLISH	5	2	GROWING SCIENCE	ISI	DETERMINING FACTORS OF DIGITAL WALLET ACTUAL USAGE A NEW MODEL TO IDENTIFY CHANGES IN CONSUMER BEHAVIOR	ARTICLE	7	2023	HUSAINAH NAZIFAH;PAULINA JULINTA;MISROFINGAH;PRADIPTA INDRY ARISTIANTO;MAULANA AMALIA E;FAHLEVI MOCHAMMAD	INT J DATA NETW SCI	none	UNIVERSITAS MUHAMMADIYAH JAKARTA;UNIVERSITAS TAMA JAGAKARSA;BINA NUSANTARA UNIVERSITY;BINA NUSANTARA UNIVERSITY;BINA NUSANTARA UNIVERSITY	NOTREPORTED;UNIVERSITAS MUHAMMADIYAH JAKARTA;NOTREPORTED		HUSAINAH N, 2023, INT J DATA NETW SCI	HUSAINAH N, 2023, INT J DATA NETW SCI	INDONESIA	HUSAINAH N, 2023,	wos
SHARMA S;ILAVARASAN P;KARANASIOS S	FINANCIAL TECHNOLOGY; FINTECH; SMALL BUSINESSES; SME	FINANCE; BUSINESS MODELS; CROSS-DISCIPLINES; FINANCIAL TECHNOLOGY; GROSS DOMESTIC PRODUCTS; PEER-TO-PEER LENDING; SMALL BUSINESS; SME; SUPPLY CHAIN FINANCES; SYSTEMATIC REVIEW; TECHNOLOGICAL INNOVATION; SUPPLY CHAINS	DEPARTMENT OF MANAGEMENT STUDIES, INDIAN INSTITUTE OF TECHNOLOGY, NEW DELHI, DELHI, 110016, INDIA; INFORMATION SYSTEMS AREA, DEPARTMENT OF MANAGEMENT STUDIES, INDIAN INSTITUTE OF TECHNOLOGY, DELHI, NEW DELHI, 110016, INDIA; SCHOOL OF BUSINESS, UNIVERSITY OF QUEENSLAND, BRISBANE, AUSTRALIA	ELECTRON. COMMER. RES.	SMALL BUSINESSES ARE SIGNIFICANT TO ANY ECONOMY FROM THE PERSPECTIVE OF EMPLOYMENT AND CONTRIBUTION TO THE NATIONAL GROSS DOMESTIC PRODUCT. DESPITE THEIR SIGNIFICANCE, SMALL BUSINESSES CONTINUE TO FACE VARIOUS UNRESOLVED CHALLENGES. RECENT TECHNOLOGICAL INNOVATIONS IN FINANCE, COLLECTIVELY CALLED FINTECH, SEEM TO ADDRESS SOME CHALLENGES. FINTECH-LED BUSINESS MODELS LIKE CROWDFUNDING, PEER-TO-PEER…	S.K. SHARMA; DEPARTMENT OF MANAGEMENT STUDIES, INDIAN INSTITUTE OF TECHNOLOGY, NEW DELHI, DELHI, 110016, INDIA; EMAIL: SACHINJAKHRANA@GMAIL.COM	10.1007/s10660-023-09705-5	13895753	ELECTRONIC COMMERCE RESEARCH	ENGLISH	8	1	SPRINGER	ISI	SMALL BUSINESSES AND FINTECH A SYSTEMATIC REVIEW AND FUTURE DIRECTIONS	ARTICLE	24	2024	SHARMA SACHIN KUMAR;ILAVARASAN P VIGNESWARA;KARANASIOS STAN	ELECTRON COMMER RES	none	INDIAN INSTITUTE OF TECHNOLOGY;INDIAN INSTITUTE OF TECHNOLOGY;UNIVERSITY OF QUEENSLAND	NOTREPORTED;INDIAN INSTITUTE OF TECHNOLOGY;NOTREPORTED		SHARMA SK, 2024, ELECTRON COMMER RES	SHARMA SK, 2024, ELECTRON COMMER RES	AUSTRALIA	SHARMA SK, 2024,	wos
RADZI R;RAMLI W;RAHMAWATI L;TANTRIANA D	E-MONEY; E-WALLET; NON-COMPLIANCE ITEM; REWARDS; SHARIAH (ISLAMIC LAW)		SCHOOL OF DISTANCE EDUCATION, UNIVERSITI SAINS MALAYSIA, PENANG, 11800, MALAYSIA; SHARIAH RESEARCH AND GOVERNANCE BANK KERJASAMA RAKYAT MALAYSIA BERHAD (BANK RAKYAT), TINGKAT 24, MENARA 1, MENARA KEMBAR BANK RAKYAT NO. 33, JALAN RAKYAT, KL SENTRAL, KUALA LUMPUR, 50470, MALAYSIA; FAKULTAS EKONOMI DAN BISNIS ISLAM, UIN SUNAN AMPEL, JL. A. YANI 117 SURABAYA, JEMUR WONOSARI, KEC. WONOCOLO, JAWA TIMUR…	INT. J. RELIG.	THE FINANCE INDUSTRY'S RAPID GROWTH AND TECHNOLOGICAL ADVANCES HAVE LED TO THE EMERGENCE OF E-WALLETS, AN ELECTRONIC PAYMENT METHOD FOR GOODS OR SERVICES WITHOUT CASH. SO FAR IN THE ISLAMIC FINANCE INDUSTRY, THE USE OF E-WALLETS IS STILL IN ITS INITIAL STAGES, AND THERE IS CURRENTLY NO GUIDELINE OR REGULATION THAT GOVERNS ITS TRANSACTIONS. THEREFORE, THIS STUDY AIMS TO EVALUATE POTENTIAL SHARIAH …		10.61707/2c0bst96	2633352X	INTERNATIONAL JOURNAL OF RELIGION	ENGLISH	0	6	TRANSNATIONAL PRESS LONDON LTD	ISI	EWALLET TRANSACTION FRAMEWORK IN MALAYSIA AN EVALUATION OF POTENTIAL SHARIAH ISSUES	ARTICLE	5	2024	RADZI RAFISAH MAT;RAMLI WAN NURLIZA W;RAHMAWATI LILIK;TANTRIANA DEASY	INT J RELIG	none	UNIVERSITI SAINS MALAYSIA;SHARIAH RESEARCH AND GOVERNANCE BANK KERJASAMA RAKYAT MALAYSIA BERHAD (BANK RAKYAT)	UNIVERSITI SAINS MALAYSIA;SHARIAH RESEARCH AND GOVERNANCE BANK KERJASAMA RAKYAT MALAYSIA BERHAD (BANK RAKYAT);NOTREPORTED		RADZI RM, 2024, INT J RELIG	RADZI RM, 2024, INT J RELIG	INDONESIA	RADZI RM, 2024,	wos
SHARI S;NORSHAHIMI A;YOP S;UMAR A;HELMI M	E-WALLET; MOBILE APPLICATION; TOUCH 'N GO; USER EXPERIENCE; USER INTERFACE	AUGMENTED REALITY; ELECTRONIC MONEY; MOBILE COMPUTING; DESIGN ELEMENTS; DIGITAL AGE; E-WALLET; FLOW FEATURES; IN-DEPTH ANALYSIS; MALAYSIA; MOBILE APPLICATIONS; SECURITY FEATURES; TOUCH 'N GO; USERS' EXPERIENCES; USER INTERFACES	INFORMATION SCIENCE STUDIES, COLLEGE OF COMPUTING, INFORMATICS AND MATHEMATICS, UNIVERSITI TEKNOLOGI MARA CAWANGAN KEDAH, KAMPUS SUNGAI PETANI, KEDAH, MERBOK, 08400, MALAYSIA; SCHOOL OF MULTIMEDIA TECHNOLOGY AND COMMUNICATION, UNIVERSITI UTARA MALAYSIA, KEDAH, SINTOK, 06010, MALAYSIA	LECT. NOTES NETWORKS SYST.	IN THE DIGITAL AGE, USER INTERFACE SATISFACTION (UIS) HAS EMERGED AS A PIVOTAL COMPONENT IN ENHANCING USER EXPERIENCE, ESPECIALLY WITHIN E-WALLET APPLICATIONS. THIS ARTICLE PROVIDES AN IN-DEPTH ANALYSIS OF THE UIS WITHIN THE TOUCH 'N GO E-WALLET, A LEADING DIGITAL PAYMENT PLATFORM IN MALAYSIA. KEY FACETS OF THE USER INTERFACE, INCLUDING DESIGN ELEMENTS LIKE HOME SCREENS, NAVIGATIONAL MENUS, TRANS…	A.S. NORSHAHIMI; SCHOOL OF MULTIMEDIA TECHNOLOGY AND COMMUNICATION, UNIVERSITI UTARA MALAYSIA, SINTOK, KEDAH, 06010, MALAYSIA; EMAIL: AIRUL_SHAZWAN_N@AHSGS.UUM.EDU.MY	10.1007/978-3-031-55911-2_28	23673370	LECTURE NOTES IN NETWORKS AND SYSTEMS	ENGLISH	0		SPRINGER SCIENCE AND BUSINESS MEDIA DEUTSCHLAND GMBH	ISI	CONCEPTUALIZING USER INTERFACE SATISFACTION IN THE TOUCH N GO EWALLET MOBILE APPLICATION	CONFERENCE PAPER	923 LNNS	2024	SHARI SHARUNIZAM;NORSHAHIMI AIRUL SHAZWAN;YOP SITI AQILAH;UMAR ASMAD RIZAL;HELMI MOHD FIRDAUS MOHD	LECT NOTES NETWORKS SYST	none	UNIVERSITI TEKNOLOGI MARA CAWANGAN KEDAH;UNIVERSITI UTARA MALAYSIA	NOTREPORTED;UNIVERSITI UTARA MALAYSIA;NOTREPORTED		SHARI S, 2024, LECT NOTES NETWORKS SYST	SHARI S, 2024, LECT NOTES NETWORKS SYST	MALAYSIA	SHARI S, 2024,	wos
GUGGENBERGER T;KÜHNE D;SCHLATT V;URBACH N	BLOCKCHAIN; DIGITAL WALLET; EIDAS; IDENTITY MANAGEMENT; PUBLIC SECTOR; SELF-SOVEREIGN IDENTITY		BRANCH BUSINESS & INFORMATION SYSTEMS ENGINEERING OF THE FRAUNHOFER FIT, BAYREUTH, GERMANY; RESEARCH CENTER FINANCE & INFORMATION MANAGEMENT, BAYREUTH, GERMANY; UNIVERSITY OF BAYREUTH, BAYREUTH, GERMANY; BAVARIAN STATE TAX OFFICE, MUNICH, GERMANY; FRANKFURT UNIVERSITY OF APPLIED SCIENCES, FRANKFURT, GERMANY	ELECTRON. MARK.	THE INTRODUCTION OF BLOCKCHAIN OFFERS NEW OPPORTUNITIES TO RETHINK ENTERPRISE IDENTITY MANAGEMENT. RECENTLY, A NEW CONCEPT HAS EMERGED IN THE BLOCKCHAIN COMMUNITY CALLED SELF-SOVEREIGN IDENTITY. SELF-SOVEREIGN IDENTITY COMBINES SEVERAL EXISTING DECENTRALIZED IDENTITY MANAGEMENT APPROACHES, PROMISING NEW WAYS TO PROMOTE MORE CONVENIENT, CONNECTED, AND SECURE IDENTITY SERVICES FOR THE PRIVATE AND P…	T. GUGGENBERGER; RESEARCH CENTER FINANCE & INFORMATION MANAGEMENT, BAYREUTH, GERMANY; EMAIL: TOBIAS.GUGGENBERGER@FIM-RC.DE	10.1007/s12525-023-00620-z	10196781	ELECTRONIC MARKETS	ENGLISH	4	1	SPRINGER SCIENCE AND BUSINESS MEDIA DEUTSCHLAND GMBH	ISI	DESIGNING A CROSSORGANIZATIONAL IDENTITY MANAGEMENT SYSTEM UTILIZING SSI FOR THE CERTIFICATION OF RETAILER ATTRIBUTES	ARTICLE	33	2023	GUGGENBERGER TOBIAS;KÜHNE DANIELA;SCHLATT VINCENT;URBACH NILS	ELECTRON MARK	none	RESEARCH CENTER FINANCE AND INFORMATION MANAGEMENT;UNIVERSITY OF BAYREUTH;BAVARIAN STATE TAX OFFICE;FRANKFURT UNIVERSITY OF APPLIED SCIENCES	NOTREPORTED;RESEARCH CENTER FINANCE AND INFORMATION MANAGEMENT;NOTREPORTED		GUGGENBERGER T, 2023, ELECTRON MARK	GUGGENBERGER T, 2023, ELECTRON MARK	GERMANY	GUGGENBERGER T, 2023,	wos
PRASETYA M;SHUHIDAN S	ACCEPTANCE; ADOPTION; E-PAYMENT; E-WALLET; TAM; UTAUT		ACCOUNTING RESEARCH INSTITUTE UNIVERSITI TEKNOLOGI MARA, SELANGOR, SHAH ALAM, MALAYSIA; DEPT OF ACCOUNTING, FACULTY OF ECONOMICS AND BUSINESS, UNIVERSITAS INDONESIA, INDONESIA; COLLEGE OF COMPUTING, INFORMATICS AND MEDIA, UNIVERSITI TEKNOLOGI MARA, SELANGOR, SHAH ALAM, MALAYSIA	MANAG. ACCOUNT. REVIEW	THE GROWTH OF E-COMMERCE HAS CREATED OTHER TECHNOLOGICAL INNOVATIONS SUCH AS ONLINE PAYMENT INITIALLY DEVELOPED BY THE BANKING INDUSTRY, SUCH AS INTERNET BANKING AND MOBILE BANKING. HOWEVER, E-WALLET PAYMENT INNOVATION HAS EMERGED AS ANOTHER ONLINE PAYMENT OPTION PROVIDED BY THE NON-BANKING SECTOR. UNFORTUNATELY, THE USAGE LEVEL OF E-WALLET PAYMENT IN INDONESIA IS STILL CONSIDERED RELATIVELY LOW …	S.M. SHUHIDAN; COLLEGE OF COMPUTING, INFORMATICS AND MEDIA, UNIVERSITI TEKNOLOGI MARA, SHAH ALAM, SELANGOR, MALAYSIA; EMAIL: SHUHAIDA@TMSK.UITM.EDU.MY		26007975	MANAGEMENT AND ACCOUNTING REVIEW	ENGLISH	2	1	UNIVERSITI TEKNOLOGI MARA	ISI	SECURITY RISK AND TRUST IN EWALLET PAYMENT SYSTEMS EMPIRICAL EVIDENCE FROM INDONESIA	ARTICLE	22	2023	PRASETYA MACHMUDIN EKA;SHUHIDAN SHUHAIDA MOHAMED	MANAG ACCOUNT REVIEW	none	ACCOUNTING RESEARCH INSTITUTE UNIVERSITI TEKNOLOGI MARA;UNIVERSITAS INDONESIA;UNIVERSITI TEKNOLOGI MARA	NOTREPORTED;UNIVERSITI TEKNOLOGI MARA;NOTREPORTED		PRASETYA ME, 2023, MANAG ACCOUNT REVIEW	PRASETYA ME, 2023, MANAG ACCOUNT REVIEW	MALAYSIA	PRASETYA ME, 2023,	wos
BISWAS S;PAMUCAR D	COMPARISON OF MOBILE WALLETS; EDAS METHOD; GREY CORRELATION; PICTURE FUZZY; TOPSIS		DECISION SCIENCES AND OPERATIONS MANAGEMENT, CALCUTTA BUSINESS SCHOOL, SOUTH 24 PARGANAS, WEST BENGAL, BISHNUPUR, 743503, INDIA; DEPARTMENT OF OPERATIONS RESEARCH AND STATISTICS, FACULTY OF ORGANIZATIONAL SCIENCES, UNIVERSITY OF BELGRADE, BELGRADE, 11000, SERBIA	FINANCIAL INNOV.	THE PRESENT PAPER HAS TWO-FOLD PURPOSES. FIRST, THE CURRENT WORK PROVIDES AN INTEGRATED THEORETICAL FRAMEWORK TO COMPARE POPULAR MOBILE WALLET SERVICE PROVIDERS BASED ON USERS' VIEWS IN THE INDIAN CONTEXT. TO THIS END, WE PROPOSE A NEW GREY CORRELATION-BASED PICTURE FUZZY-EVALUATION BASED ON DISTANCE FROM AVERAGE SOLUTION (GCPF-EDAS) FRAMEWORK FOR THE COMPARATIVE ANALYSIS. WE INTEGRATE THE FUNDAM…	D. PAMUCAR; DEPARTMENT OF OPERATIONS RESEARCH AND STATISTICS, FACULTY OF ORGANIZATIONAL SCIENCES, UNIVERSITY OF BELGRADE, BELGRADE, 11000, SERBIA; EMAIL: DPAMUCAR@GMAIL.COM	10.1186/s40854-022-00443-5	21994730	FINANCIAL INNOVATION	ENGLISH	11	1	SPRINGER SCIENCE AND BUSINESS MEDIA DEUTSCHLAND GMBH	ISI	A MODIFIED EDAS MODEL FOR COMPARISON OF MOBILE WALLET SERVICE PROVIDERS IN INDIA	ARTICLE	9	2023	BISWAS SANJIB;PAMUCAR DRAGAN	FINANCIAL INNOV	none	CALCUTTA BUSINESS SCHOOL;UNIVERSITY OF BELGRADE	NOTREPORTED;UNIVERSITY OF BELGRADE;NOTREPORTED		BISWAS S, 2023, FINANCIAL INNOV	BISWAS S, 2023, FINANCIAL INNOV	SERBIA	BISWAS S, 2023,	wos
AISYAH M;SESUNAN Y	DECISION; E-WALLET; PERCEIVED ENJOYMENT; PERCEIVED TRUST; SHARIA; SUBJECTIVE NORMS; TECHNOLOGY ACCEPTANCE MODEL; THEORY PLANNED BEHAVIOR		FACULTY OF ECONOMICS AND BUSINESS, UNIVERSITAS ISLAM NEGERI SYARIF HIDAYATULLAH JAKARTA, INDONESIA	INT. J. DATA NETW. SCI.	THIS STUDY INTEGRATES THE TECHNOLOGY ACCEPTANCE MODEL (TAM) WITH THE THEORY OF PLANNED BEHAVIOR (TPB) TO ANALYZE CONSUMERS' DECISIONS TO USE A SHARIAH-BASED E-WALLET IN INDONESIA. WITH CONVENIENCE SAMPLING, A HUNDRED SAMPLES WERE CALCULATED BY USING SEM-PLS ANALYSIS. IT FOUND THAT ONLY PERCEIVED TRUST AND INTENTION INFLUENCED CONSUMERS' DECISIONS TO USE A SHARIAH-BASED EWALLET, WHILE PERCEIVED EA…	M. AISYAH; FACULTY OF ECONOMICS AND BUSINESS, UNIVERSITAS ISLAM NEGERI SYARIF HIDAYATULLAH JAKARTA, INDONESIA; EMAIL: MUNIATY.AISYAH@UINJKT.AC.ID	10.5267/j.ijdns.2023.7.017	25618148	INTERNATIONAL JOURNAL OF DATA AND NETWORK SCIENCE	ENGLISH	0	4	GROWING SCIENCE	ISI	DECISION MAKING ON THE USE OF A SHARIAHBASED EWALLET BY INDONESIAN CONSUMERS	ARTICLE	7	2023	AISYAH MUNIATY;SESUNAN YUNIA SILVIA	INT J DATA NETW SCI	none	UNIVERSITAS ISLAM NEGERI SYARIF HIDAYATULLAH JAKARTA	NOTREPORTED;UNIVERSITAS ISLAM NEGERI SYARIF HIDAYATULLAH JAKARTA;NOTREPORTED		AISYAH M, 2023, INT J DATA NETW SCI	AISYAH M, 2023, INT J DATA NETW SCI	INDONESIA	AISYAH M, 2023,	wos
KURHAN N;FARTUSHNIAK O;BEZKOROVAINA L	CLOUD ACCOUNTING SERVICES; E-WALLET; ELECTRONIC FINANCIAL REPORTING; PAYMENT SYSTEM; TAXONOMY; TRANSACTION		SIMON KUZNETS KHARKIV NATIONAL UNIVERSITY OF ECONOMICS, 9A NAUKA AVE, KHARKIV, 61166, UKRAINE	ECON. DEV.	IN THE CONDITIONS OF DIGITIZATION OF THE GLOBALIZED WORLD ECONOMY, UKRAINIAN ENTERPRISES HAVE AN INFORMATIONAL REQUEST FOR METHODICAL RECOMMENDATIONS REGARDING THE TECHNIQUE OF CONDUCTING AND COMPUTERIZED ACCOUNTING OF ELECTRONIC MONEY PAYMENTS, WHICH ARE AN INNOVATIVE FORM OF SETTLEMENT TRANSACTIONS. THE PURPOSE OF THE STUDY WAS TO FORM ACTUAL METHODOLOGICAL RECOMMENDATIONS REGARDING THE ORGANIZ…		10.57111/econ/3.2023.08	16831942	ECONOMICS OF DEVELOPMENT	ENGLISH	2	3	SIMON KUZNETS KHARKIV NATIONAL UNIVERSITY OF ECONOMICS	ISI	IMPROVEMENT OF ORGANIZATION AND AUTOMATION OF COMMERCIAL ENTERPRISE ELECTRONIC MONEY ACCOUNTING IN CONDITIONS OF ECONOMY DIGITALIZATION	ARTICLE	22	2023	KURHAN NATALIA;FARTUSHNIAK OLHA;BEZKOROVAINA LIDIIA	ECON DEV	none	SIMON KUZNETS KHARKIV NATIONAL UNIVERSITY OF ECONOMICS	SIMON KUZNETS KHARKIV NATIONAL UNIVERSITY OF ECONOMICS		KURHAN N, 2023, ECON DEV	KURHAN N, 2023, ECON DEV	UKRAINE	KURHAN N, 2023,	wos
HADDAD S;NASIB N			ARAB ACADEMY FOR SCIENCE, TECHNOLOGY, AND MARITIME TRANSPORT, EGYPT	CASES ON INTERNATIONAL BUS. LOG. IN THE MID. EAST	TECHNOLOGY HAS PROGRESSED FROM BEING A SUPPORTER OF THE FUNDAMENTAL ELEMENT OF TODAY'S ECONOMY. THE "DIGITAL ECONOMY" INCLUDES DIGITAL SECTORS, SUCH AS MEDIA, E-COMMERCE, AS WELL AS TRADITIONAL INDUSTRIES THAT HAVE BEEN TOUCHED BY DIGITALIZATION TO VARYING DEGREES. THIS CASE STUDY FOCUSES ON THE SAUDI E-COMMERCE RETAIL INDUSTRY AND HOW MUCH IT HAS GROWN EXPONENTIALLY THROUGH INCREASED INTERNET PE…		10.4018/978-1-6684-4686-7.ch010		CASES ON INTERNATIONAL BUSINESS LOGISTICS IN THE MIDDLE EAST	ENGLISH	0		IGI GLOBAL	ISI	THE ROLE OF ONLINE PLATFORMS IN ENHANCING LOGISTICS ACTIVITY PERFORMANCE CASE STUDY SALLA PLATFORM KSA	BOOK CHAPTER		2023	HADDAD SANDRA SAMY;NASIB NOURHAN FOAAD	CASES ON INTERNATIONAL BUS LOG IN THE MID EAST	none	ARAB ACADEMY FOR SCIENCE	ARAB ACADEMY FOR SCIENCE		HADDAD SS, 2023, CASES ON INTERNATIONAL BUS LOG IN THE MID EAST	HADDAD SS, 2023, CASES ON INTERNATIONAL BUS LOG IN THE MID EAST	EGYPT	HADDAD SS, 2023,	wos
KAVITHA B;RAJINI G	BIOMETRIC RECOGNITION; CUSTOMER FULFILLMENT; DIGITAL WALLET. ARTIFICIAL INTELLIGENCE; PROTOCOLS; TECHNOLOGY		VELS INSTITUTE OF SCIENCE, TECHNOLOGY & ADVANCED STUDIES, PALLAVARAM, CHENNAI, 6000117, INDIA	INTERNAT. J. INTEL. SYST. APPL. ENG.	THE INTEGRATION OF ARTIFICIAL INTELLIGENCE (AI) INTO DIGITAL WALLETS IS AN INTRIGUING REPRESENTATION OF THE MANNER IN WHICH MONEY AND TECHNOLOGY ARE MINGLING IN THE MODERN DIGITAL AGE. DIGITAL WALLETS, WHICH ARE EVOLVING FROM TRANSACTIONAL TOOLS TO SOPHISTICATED SYSTEMS WITH CUTTING-EDGE CAPABILITIES, ARE INCORPORATING ARTIFICIAL INTELLIGENCE. THIS ESSAY EXAMINES THE INTRICATE RELATIONSHIP BETWEE…	G. RAJINI; VELS INSTITUTE OF SCIENCE, TECHNOLOGY & ADVANCED STUDIES, CHENNAI, PALLAVARAM, 6000117, INDIA; EMAIL: RAJINI.SMS@VISTAS.AC.IN		21476799	INTERNATIONAL JOURNAL OF INTELLIGENT SYSTEMS AND APPLICATIONS IN ENGINEERING	ENGLISH	0	12	ISMAIL SARITAS	ISI	THE IMPACT OF AIDRIVEN TECHNOLOGICAL INFLUENCES ON SECURITY MEASURES WITHIN DIGITAL WALLETS AMID DIGITAL REVOLUTION	ARTICLE	12	2024	KAVITHA B;RAJINI G	INTERNAT J INTEL SYST APPL ENG	none	VELS INSTITUTE OF SCIENCE	NOTREPORTED;VELS INSTITUTE OF SCIENCE;NOTREPORTED		KAVITHA B, 2024, INTERNAT J INTEL SYST APPL ENG	KAVITHA B, 2024, INTERNAT J INTEL SYST APPL ENG	INDIA	KAVITHA B, 2024,	wos
JOSHI H;CHAWLA D	ATTITUDE; INDIA; INTENTION; MOBILE WALLET; PARALLEL AND SERIAL MEDIATION; PERCEIVED SECURITY; SOR; TRUST		INTERNATIONAL MANAGEMENT INSTITUTE NEW DELHI, NEW DELHI, INDIA	INT. J. BANK MARK.	PURPOSE: THE STUDY INVESTIGATES THE INFLUENCE OF PERCEIVED SECURITY (PS) ON BEHAVIORAL INTENTION (BI) VIA THE TRUST ATTITUDE PROCESS AND EXPLORES THE MODERATING EFFECTS OF GENDER. PS IN MOBILE WALLETS ENHANCES USER TRUST (TR), ATTITUDE (ATT) AND INTENTION (INT). USING A MULTIPLE AND SERIAL MEDIATION MODEL, BOTH TR AND ATT WERE FOUND TO MEDIATE THE RELATIONSHIP BETWEEN PS AND BI. DESIGN/METHODOLOG…	H. JOSHI; INTERNATIONAL MANAGEMENT INSTITUTE NEW DELHI, NEW DELHI, INDIA; EMAIL: HIMANSHU@IMI.EDU	10.1108/IJBM-02-2023-0118	02652323	INTERNATIONAL JOURNAL OF BANK MARKETING	ENGLISH	0		EMERALD PUBLISHING	ISI	IMPACT OF SECURITY ON WALLET ADOPTION MULTIPLE AND SERIAL MEDIATING ROLES OF TRUST AND ATTITUDE AND GENDER AS A MODERATOR	ARTICLE		2024	JOSHI HIMANSHU;CHAWLA DEEPAK	INT J BANK MARK	none	INTERNATIONAL MANAGEMENT INSTITUTE NEW DELHI	NOTREPORTED;INTERNATIONAL MANAGEMENT INSTITUTE NEW DELHI;NOTREPORTED		JOSHI H, 2024, INT J BANK MARK	JOSHI H, 2024, INT J BANK MARK	INDIA	JOSHI H, 2024,	wos
QUINTERO R;QUINTERO F	ARTIFICIAL INTELLIGENCE; BLOCKCHAIN TECHNOLOGY; CONSUMER EXPECTATIONS; CYBERSECURITY; DIGITAL EXPECTATIONS; FINANCIAL INDUSTRIES; FINTECH		FACULTAD DE CIENCIAS DE LA INGENIERÍA, ADMINISTRATIVAS Y SOCIALES, UNIVERSIDAD AUTÓNOMA DE BAJA CALIFORNIA, TECATE, BAJA CALIFORNIA, MEXICO; CENTRO DE ESTUDIOS DE ASIA Y ÁFRICA, EL COLEGIO DE MÉXICO, MEXICO, DISTRITO FEDERAL, MEXICO	IEEE TECHNOLOGY AND ENGINEERING MANAG. SOC. BODY OF KNOWLEDGE (TEMSBOK)	THE MODERN FINANCIAL SYSTEM IS QUITE DIFFERENT FROM MOST MODELS OF THE PAST; IT RELIES HEAVILY ON GLOBALIZATION AND THE PROCESSES THIS ENGENDERS: GLOBALIZATION HAS CERTAINLY CREATED A NEW FINANCIAL REALITY IN MODERN-DAY SOCIETY. ONE OF GLOBALIZATIONS' MOST IMPORTANT FEATURES, TECHNOLOGY, HAS BECOME A MUST IN THE FINANCIAL SECTOR, AS WELL AS IN MANY OTHER SECTORS OF HUMAN ENDEAVOR, AN INDUSTRY THA…		10.1002/9781119987635.ch2		IEEE TECHNOLOGY AND ENGINEERING MANAGEMENT SOCIETY BODY OF KNOWLEDGE (TEMSBOK)	ENGLISH	0		WILEY	ISI	FINTECH AND CONSUMER EXPECTATIONS A GLOBAL PERSPECTIVE	BOOK CHAPTER		2023	QUINTERO REYNA VIRGINIA BARRAGÁN;QUINTERO FERNANDO BARRAGÁN	IEEE TECHNOLOGY AND ENGINEERING MANAG SOC BODY OF KNOWLEDGE (TEMSBOK)	none	UNIVERSIDAD AUTÓNOMA DE BAJA CALIFORNIA;CENTRO DE ESTUDIOS DE ASIA Y ÁFRICA	UNIVERSIDAD AUTÓNOMA DE BAJA CALIFORNIA;CENTRO DE ESTUDIOS DE ASIA Y ÁFRICA		QUINTERO RVB, 2023, IEEE TECHNOLOGY AND ENGINEERING MANAG SOC BODY OF KNOWLEDGE (TEMSBOK)	QUINTERO RVB, 2023, IEEE TECHNOLOGY AND ENGINEERING MANAG SOC BODY OF KNOWLEDGE (TEMSBOK)	MEXICO	QUINTERO RVB, 2023,	wos
TAN E;LEROUGE E;DU C J;DU S D	BLOCKCHAIN; DIGITAL WALLETS; EBSI; EDUCATION; SELF-SOVEREIGN IDENTITY; VERIFIABLE CREDENTIALS	E-LEARNING; ECOSYSTEMS; ELECTRONIC DOCUMENT IDENTIFICATION SYSTEMS; INTEROPERABILITY; PUBLIC ADMINISTRATION; ACTION RESEARCH; BELGIUM; BLOCK-CHAIN; CROSS-BORDER; DIGITAL WALLETS; EUROPEAN BLOCKCHAIN SERVICE INFRASTRUCTURE; SELF-SOVEREIGN IDENTITY; SERVICES INFRASTRUCTURES; VERIFIABLE CREDENTIAL; BLOCKCHAIN	PUBLIC GOVERNANCE INSTITUTE (PGI), KATHOLIEKE UNIVERSITEIT LEUVEN, LEUVEN, 3000, BELGIUM; KU LEUVEN ICTS, KATHOLIEKE UNIVERSITEIT LEUVEN, LEUVEN, 3001, BELGIUM; CITY OF GENT/EUROPEAN BLOCKCHAIN PARTNERSHIP, GENT, 9000, BELGIUM	BIG DATA COGN. COMPUTING	THE EUROPEAN BLOCKCHAIN SERVICES INFRASTRUCTURE (EBSI) IS A MAJOR POLICY INITIATIVE OF THE EU AND EUROPEAN BLOCKCHAIN PARTNERSHIP, TO LEVERAGE BLOCKCHAIN TO CREATE CROSS-BORDER SERVICES FOR PUBLIC ADMINISTRATIONS, BUSINESSES, CITIZENS, AND THEIR ECOSYSTEMS, TO VERIFY INFORMATION AND INCREASE TRUST IN SERVICES. THE EBSI AIMS TO PROVIDE A SECURE AND INTEROPERABLE SYSTEM INFRASTRUCTURE, UTILIZING NE…	E. TAN; PUBLIC GOVERNANCE INSTITUTE (PGI), KATHOLIEKE UNIVERSITEIT LEUVEN, LEUVEN, 3000, BELGIUM; EMAIL: EVRIM.TAN@KULEUVEN.BE	10.3390/bdcc7020079	25042289	BIG DATA AND COGNITIVE COMPUTING	ENGLISH	3	2	MDPI	ISI	VERIFICATION OF EDUCATION CREDENTIALS ON EUROPEAN BLOCKCHAIN SERVICES INFRASTRUCTURE EBSI ACTION RESEARCH IN A CROSSBORDER USE CASE BETWEEN BELGIUM AND ITALY	ARTICLE	7	2023	TAN EVRIM;LEROUGE ELLEN;DU CAJU JAN;DU SEUIL DANIËL	BIG DATA COGN COMPUTING	none	KATHOLIEKE UNIVERSITEIT LEUVEN;KATHOLIEKE UNIVERSITEIT LEUVEN	NOTREPORTED;KATHOLIEKE UNIVERSITEIT LEUVEN;NOTREPORTED		TAN E, 2023, BIG DATA COGN COMPUTING	TAN E, 2023, BIG DATA COGN COMPUTING	BELGIUM	TAN E, 2023,	wos
SANNY L;CHANDRA G;CHELLES K;SANTOSO L	E-WALLET; GENERATION Z; IMPULSE BUYING; S-O-R		MANAGEMENT DEPARTMENT, BINUS BUSINESS SCHOOL, MASTER PROGRAM, BINA NUSANTARA UNIVERSITY, JAKARTA, INDONESIA	J. APPL. ENG. TECHNOL. SCI.	THIS RESEARCH AIMS TO ANALYZE THE IMPULSE BUYING OF GEN Z WHEN USING E-WALLETS IN INDONESIA. THIS TYPE OF RESEARCH IS QUANTITATIVE RESEARCH USING THE PARTIAL LEAST SQUARES STRUCTURAL EQUATION MODELING (SEM) FRAMEWORK. THE SAMPLING TECHNIQUE INVOLVED CONVENIENCE SAMPLING WITH A TOTAL OF 393 GEN Z E-WALLET USERS IN INDONESIA WHO HAD BEEN SURVEYED ONLINE. THEORETICAL IMPLICATIONS IN THIS STUDY ARE I…	L. SANNY; MANAGEMENT DEPARTMENT, BINUS BUSINESS SCHOOL, MASTER PROGRAM, BINA NUSANTARA UNIVERSITY, JAKARTA, INDONESIA; EMAIL: LSANNY@BINUS.EDU	10.37385/jaets.v5i1.2600	27156087	JOURNAL OF APPLIED ENGINEERING AND TECHNOLOGICAL SCIENCE	ENGLISH	0	1	INTELLECTUAL RESEARCH AND DEVELOPMENT EDUCATION FOUNDATION (YRPI)	ISI	THE IMPULSE BUYING OF GEN Z WHEN USING EWALLET IN INDONESIA	ARTICLE	5	2023	SANNY LIM;CHANDRA GILANG RAFI;CHELLES KITSY;SANTOSO LAURENT ANGELICA	J APPL ENG TECHNOL SCI	none	BINA NUSANTARA UNIVERSITY	NOTREPORTED;BINA NUSANTARA UNIVERSITY;NOTREPORTED		SANNY L, 2023, J APPL ENG TECHNOL SCI	SANNY L, 2023, J APPL ENG TECHNOL SCI	INDONESIA	SANNY L, 2023,	wos
RANA N;LUTHRA S;RAO H	INDIA; ISM; MICMAC; MOBILE WALLET; REGULATORY COMPLIANCE; USAGE		COLLEGE OF BUSINESS AND ECONOMICS, QATAR UNIVERSITY, DOHA, QATAR; DEPARTMENT OF MECHANICAL ENGINEERING, CH RANBIR SINGH STATE INSTITUTE OF ENGINEERING AND TECHNOLOGY, JHAJJAR, INDIA; DEPARTMENT OF ISCS, COB, UNIVERSITY OF TEXAS AT SAN ANTONIO, SAN ANTONIO, TX, UNITED STATES	INF. TECHNOL. PEOPLE	PURPOSE: MOBILE-BASED PAYMENT IS INCREASING EXPONENTIALLY BUT IN THE DEVELOPING COUNTRY LIKE INDIA, CONSUMERS’ PERCEPTION IS HIGHLY POSITIVE IN DAILY CASH TRANSACTION. THE PURPOSE OF THIS RESEARCH IS TO IDENTIFY AND EXAMINE THE IMPORTANT CHALLENGES FOR MOBILE WALLET (M-WALLET) IMPLEMENTATION IN INDIA. IN THE WAKE OF COVID-19, ONE OF THE TRANSMISSION MECHANISMS OF THIS VIRUS HAS BEEN THE COINS AND…	N.P. RANA; COLLEGE OF BUSINESS AND ECONOMICS, QATAR UNIVERSITY, DOHA, QATAR; EMAIL: NRANANP@GMAIL.COM	10.1108/ITP-07-2021-0535	09593845	INFORMATION TECHNOLOGY AND PEOPLE	ENGLISH	12	4	EMERALD PUBLISHING	ISI	ASSESSING CHALLENGES TO THE MOBILE WALLET USAGE IN INDIA ANINTERPRETIVE STRUCTURAL MODELLING APPROACH	ARTICLE	36	2023	RANA NRIPENDRA P;LUTHRA SUNIL;RAO H RAGHAV	INF TECHNOL PEOPLE	none	QATAR UNIVERSITY;CH RANBIR SINGH STATE INSTITUTE OF ENGINEERING AND TECHNOLOGY;UNIVERSITY OF TEXAS AT SAN ANTONIO	NOTREPORTED;QATAR UNIVERSITY;NOTREPORTED		RANA NP, 2023, INF TECHNOL PEOPLE	RANA NP, 2023, INF TECHNOL PEOPLE	USA	RANA NP, 2023,	wos
ROY P;KUMAR A;SINGH A;SANGAIAH A	BITCOIN; CRYPTOCURRENCY; DEEP LEARNING; GRU; LSTM; MACHINE LEARNING	BITCOIN; COSTS; FORECASTING; LONG SHORT-TERM MEMORY; COMPUTER FILES; COMPUTER SCIENTISTS; CONSUMER-CENTRIC; DEEP LEARNING; DIGITAL WALLETS; GRU; HIDDEN-MARKOV MODELS; MACHINE-LEARNING; PREDICTIVE MODELS; HIDDEN MARKOV MODELS	INDIAN INSTITUTE OF INFORMATION TECHNOLOGY SURAT, DEPARTMENT OF COMPUTER SCIENCE AND ENGINEERING, SURAT, 394190, INDIA; MOTILAL NEHRU NATIONAL INSTITUTE OF TECHNOLOGY ALLAHABAD, DEPARTMENT OF COMPUTER SCIENCE AND ENGINEERING, PRAYAGRAJ, 211004, INDIA; KIIT DEEMED TO BE UNIVERSITY, SCHOOL OF COMPUTER ENGINEERING, BHUBANESWAR, 751024, INDIA; NATIONAL YUNLIN UNIVERSITY OF SCIENCE AND TECHNOLOGY, INT…	IEEE TRANS CONSUM ELECTRON	AS CRYPTOCURRENCIES BECOME MORE POPULAR AS INVESTMENT VEHICLES, BITCOIN DRAWS INTEREST FROM BUSINESSES, CONSUMERS, AND COMPUTER SCIENTISTS ALL ACROSS THE WORLD. BITCOIN IS A COMPUTER FILE STORED IN DIGITAL WALLET APPLICATIONS WHERE EACH TRANSACTION IS SECURED USING STRONG CRYPTOGRAPHIC ALGORITHMS. IT WAS CHALLENGING TO FORECAST THE FUTURE PRICE OF BITCOIN DUE TO ITS NONLINEARITY AND EXTREME VOLAT…	A. SINGH; KIIT DEEMED TO BE UNIVERSITY, SCHOOL OF COMPUTER ENGINEERING, BHUBANESWAR, 751024, INDIA; EMAIL: ASHISHASHISH307@GMAIL.COM; A.K. SANGAIAH; NATIONAL YUNLIN UNIVERSITY OF SCIENCE AND TECHNOLOGY, INTERNATIONAL GRADUATE INSTITUTE OF AI, DOULIOU, 64002, TAIWAN; EMAIL: AKSANGAIAH@IEEE.ORG	10.1109/TCE.2023.3321653	00983063	IEEE TRANSACTIONS ON CONSUMER ELECTRONICS	ENGLISH	0	1	INSTITUTE OF ELECTRICAL AND ELECTRONICS ENGINEERS INC.	ISI	FORECASTING BITCOIN PRICES USING DEEP LEARNING FOR CONSUMERCENTRIC INDUSTRIAL APPLICATIONS	ARTICLE	70	2024	ROY PRADEEP KUMAR;KUMAR ABHINAV;SINGH ASHISH;SANGAIAH ARUN KUMAR	IEEE TRANS CONSUM ELECTRON	none	INDIAN INSTITUTE OF INFORMATION TECHNOLOGY SURAT;MOTILAL NEHRU NATIONAL INSTITUTE OF TECHNOLOGY ALLAHABAD;KIIT DEEMED TO BE UNIVERSITY;NATIONAL YUNLIN UNIVERSITY OF SCIENCE AND TECHNOLOGY;LEBANESE AMERICAN UNIVERSITY	NOTREPORTED;KIIT DEEMED TO BE UNIVERSITY;NOTREPORTED;NOTREPORTED;NATIONAL YUNLIN UNIVERSITY OF SCIENCE AND TECHNOLOGY;NOTREPORTED		ROY PK, 2024, IEEE TRANS CONSUM ELECTRON	ROY PK, 2024, IEEE TRANS CONSUM ELECTRON	LEBANON	ROY PK, 2024,	wos
MEENAKSHI M;VIJAYALAKSHMI P;PRABAKARAN V;RUDRESH S;DEVICHANDRIKA S;VASUDEVAN U M	CONDITIONAL RANDOM FIELDS (CRF); FOOD PRODUCTS MARKETING; ONLINE FOOD DELIVERY (OFD)	COMMERCE; MARKETING; RANDOM PROCESSES; URBAN GROWTH; CONDITIONAL RANDOM FIELD; DIGITAL MARKETING; FOOD DELIVERY; FOOD PRODUCT MARKETING; MARKETING STRATEGY; ONLINE FOOD DELIVERY; ONLINE RETAILS; PRODUCT MARKETING; RANDOM FIELDS; RETAIL BUSINESS; FOOD PRODUCTS	APEEJAY STYA UNIVERSITY, GURUGRAM, INDIA; CMS BUSINESS SCHOOL, JAIN (DEEMED-TO-BE UNIVERSITY), FACULTY OF MANAGEMENT STUDIES, BENGALURU, KARNATAKA, INDIA; SNS COLLEGE OF TECHNOLOGY, DEPARTMENT OF MANAGEMENT STUDIES, TAMIL NADU, COIMBATORE, INDIA; ST CLARET COLLEGE, DEPARTMENT OF MANAGEMENT -UG, BANGALORE, INDIA; ST FRANCIS DE SALES COLLEGE, DEPARTMENT OF BUSINESS ADMINISTRATION, BANGALORE, INDIA;…	INT. CONF. INTELL. DATA COMMUN. TECHNOL. INTERNET THINGS, IDCIOT	THE USE OF DIGITAL APPS TO ALLOW MEAL DELIVERY IS ONE OF THE MOST RAPIDLY INCREASING TRENDS IN THE ONLINE RETAIL BUSINESS. THE ADVENT OF ONLINE TOOLS HAS INTRODUCED NOVEL APPROACHES TO THE FOOD INDUSTRY. CONSUMERS MAY NOW ACCESS MENUS FROM A WIDE VARIETY OF EATERIES ANYTIME, ANYWHERE THANKS TO ONLINE ORDERING. ONLINE PURCHASING IS NOW MORE ACCESSIBLE THAN EVER BEFORE BECAUSE TO DEVELOPMENTS LIKE …		10.1109/IDCIoT59759.2024.10467788		2ND INTERNATIONAL CONFERENCE ON INTELLIGENT DATA COMMUNICATION TECHNOLOGIES AND INTERNET OF THINGS, IDCIOT 2024	ENGLISH	0		INSTITUTE OF ELECTRICAL AND ELECTRONICS ENGINEERS INC.	ISI	EFFECTIVENESS OF DIGITAL MARKETING STRATEGIES IN THE FOOD DELIVERY BUSINESS BASED ON HYBRID BIGRUCRF APPROACH	CONFERENCE PAPER		2024	MEENAKSHI;VIJAYALAKSHMI P;PRABAKARAN V;RUDRESH S;DEVICHANDRIKA S;VASUDEVAN UNNI MANU	INT CONF INTELL DATA COMMUN TECHNOL INTERNET THINGS, IDCIOT	none	APEEJAY STYA UNIVERSITY;JAIN (DEEMED-TO-BE UNIVERSITY);SNS COLLEGE OF TECHNOLOGY;ST CLARET COLLEGE;ST FRANCIS DE SALES COLLEGE;ST. CLARET COLLEGE	APEEJAY STYA UNIVERSITY;JAIN (DEEMED-TO-BE UNIVERSITY);SNS COLLEGE OF TECHNOLOGY;ST CLARET COLLEGE;ST FRANCIS DE SALES COLLEGE;ST. CLARET COLLEGE		MEENAKSHI M, 2024, INT CONF INTELL DATA COMMUN TECHNOL INTERNET THINGS, IDCIOT	MEENAKSHI M, 2024, INT CONF INTELL DATA COMMUN TECHNOL INTERNET THINGS, IDCIOT	INDIA	MEENAKSHI M, 2024, INT CONF INTELL DATA COMMUN TECHNOL INTERNET THINGS,	wos
MUBARAK S;SULTAN M;ALNAWAYSEH S;AL-SIT W;ALZOUBI H	DIGITAL WALLET; HUMAN-COMPUTER INTERACTION (HCI); MOBILE PAYMENT	ELECTRONIC MONEY; GLOBAL SYSTEM FOR MOBILE COMMUNICATIONS; ITERATIVE METHODS; DIGITAL WALLETS; HUMAN USE; HUMAN-COMPUTER INTERACTION; INTERACTIVE COMPUTING SYSTEM; MOBILE PAYMENT; PERFORMANCE METRICES; QUALITY OF INTERACTION; SYSTEM DEVELOPMENT; SYSTEM EVALUATION; USERS' EXPERIENCES; HUMAN COMPUTER INTERACTION	SCHOOL OF INFORMATION TECHNOLOGY, SKYLINE UNIVERSITY COLLEGE, SHARJAH, UNITED ARAB EMIRATES; ELECTRICAL ENGINEERING DEPARTMENT, MU’TAH UNIVERSITY, MU’TAH, JORDAN; DEPARTMENT OF COMPUTER ENGINEERING, MU’TAH UNIVERSITY, MU’TAH, JORDAN; HIGHER COLLEGES OF TECHNOLOGY, DUBAI, UNITED ARAB EMIRATES; SCHOOL OF BUSINESS, SKYLINE UNIVERSITY COLLEGE, SHARJAH, UNITED ARAB EMIRATES; APPLIED SCIENCE RESEARCH C…	STUD. BIG. DATA.	THE DESIRE FOR A BETTER USER EXPERIENCE WHILE ENGAGING WITH MOBILE PAYMENT APPS (APPS) AND ELECTRONIC WALLETS (DIGITAL WALLET SYSTEMS) IS GROWING AS THE USE OF THESE APPS GROWS. HUMAN- COMPUTER INTERACTION (HCI) IS THE STUDY OF HOW TO DEVELOP, EVALUATE, AND IMPLEMENT INTERACTIVE COMPUTING SYSTEMS FOR HUMAN USE. USABILITY, OR THE QUALITY OF INTERACTIONS WITH A PRODUCT OR SYSTEM, IS ONE COMPONENT O…	H.M. ALZOUBI; SCHOOL OF BUSINESS, SKYLINE UNIVERSITY COLLEGE, SHARJAH, UNITED ARAB EMIRATES; EMAIL: HAITHAM.ALZUBI@SKYLINEUNIVERSITY.AC.AE	10.1007/978-3-031-55221-2_16	21976503	STUDIES IN BIG DATA	ENGLISH	0		SPRINGER SCIENCE AND BUSINESS MEDIA DEUTSCHLAND GMBH	ISI	DIGITAL WALLET SYSTEM DEVELOPMENT AND EVALUATION	BOOK CHAPTER	147	2024	MUBARAK SHAIKHA OMAR;SULTAN MAHRA KHADIM;ALNAWAYSEH SAIF E A;AL-SIT WALEED T;ALZOUBI HAITHAM M	STUD BIG DATA	none	SKYLINE UNIVERSITY COLLEGE;MU’TAH UNIVERSITY;MU’TAH UNIVERSITY;HIGHER COLLEGES OF TECHNOLOGY;SKYLINE UNIVERSITY COLLEGE;APPLIED SCIENCE PRIVATE UNIVERSITY	NOTREPORTED;SKYLINE UNIVERSITY COLLEGE;EMAIL: HAITHAM.ALZUBI@SKYLINEUNIVERSITY.AC.AE		MUBARAK SO, 2024, STUD BIG DATA	MUBARAK SO, 2024, STUD BIG DATA	JORDAN	MUBARAK SO, 2024,	wos
KHASAWNEH O;ALBAHSH R	EASE OF USE; FACILITATING CONDITIONS; FINTECH COMPANIES; INTENTION TO USE TECHNOLOGY; JORDAN; MOBILE WALLET; PERCEIVED USEFULNESS; PLS 3; UTAUT2		DEPARTMENT, AMMAN ARAB UNIVERSITY, JORDAN; BUSINESS SCHOOL, GERMAN JORDANIAN UNIVERSITY, JORDAN	INVESTM. MANANGE. FINANC. INNOV.	UNDERSTANDING CONSUMER INTENTIONS REGARDING MOBILE WALLET (M-WALLET) ADOPTION IS PARAMOUNT IN THE MOBILE COMMERCE LANDSCAPE, PARTICULARLY IN CASH-CENTRIC ECONOMIES LIKE JORDAN. DESPITE EFFORTS TO SHIFT TOWARD DIGITAL PAYMENTS, CASH TRANSACTIONS REMAIN PREVALENT, HIGHLIGHTING THE NEED TO EXPLORE M-WALLET SERVICE ADOPTION DYNAMICS IN JORDAN. THIS STUDY AIMS TO IDENTIFY THE FACTORS INFLUENCING JORDA…		10.21511/imfi.21(2).2024.07	18104967	INVESTMENT MANAGEMENT AND FINANCIAL INNOVATIONS	ENGLISH	1	2	LLC CPC BUSINESS PERSPECTIVES	ISI	WHY DO PEOPLE USE A MOBILE WALLET THE CASE OF FINTECH COMPANIES IN JORDAN	ARTICLE	21	2024	KHASAWNEH OHOUD;ALBAHSH RANA	INVESTM MANANGE FINANC INNOV	none	AMMAN ARAB UNIVERSITY;GERMAN JORDANIAN UNIVERSITY	AMMAN ARAB UNIVERSITY;GERMAN JORDANIAN UNIVERSITY		KHASAWNEH O, 2024, INVESTM MANANGE FINANC INNOV	KHASAWNEH O, 2024, INVESTM MANANGE FINANC INNOV	JORDAN	KHASAWNEH O, 2024,	wos
BIRCH D;RICHARDSON V	DIGITAL IDENTITY; METAVERSE; TOKENISATION; VIRTUAL WORLDS; WEB		15MB LTD, 1 ARMADALE ROAD, WOKING, GU213LB, UNITED KINGDOM; MEECO PTY, AUSTRALIA	J. PAYM. STRATEG. SYST.	THIS PAPER BUILDS A STRUCTURED MODEL OF THE METAVERSE, THE BUILDING BLOCKS THAT ARE NEEDED TO MAKE IT USEFUL FOR BUSINESS — IN OTHER WORDS, TRANSACTIONS — AND THE NEW SERVICES (AND THEREFORE NEW SERVICE OPPOR-TUNITIES) THAT IT PRESENTS. THE MODEL BRINGS TOGETHER THE VIRTUAL WORLDS WHERE TRANSACTIONS CAN TAKE PLACE, THE DIGITAL ASSETS THAT WILL BE EXCHANGED IN THOSE TRANSACTIONS, AND THE DIGITAL I…			17501806	JOURNAL OF PAYMENTS STRATEGY AND SYSTEMS	ENGLISH	1	2	HENRY STEWART PUBLICATIONS	ISI	METAMONEY PAYMENTS IN THE METAVERSE	ARTICLE	17	2023	BIRCH DAVID G W;RICHARDSON VICTORIA J	J PAYM STRATEG SYST	none	NOTREPORTED	NOTREPORTED;NOTREPORTED		BIRCH DGW, 2023, J PAYM STRATEG SYST	BIRCH DGW, 2023, J PAYM STRATEG SYST	AUSTRALIA	BIRCH DGW, 2023,	wos
KIM O;VAN N D;PHAM V	E-WALLET; INTENTIONS; PERCEIVED EASE OF USE; PERCEIVED USEFULNESS; PERSONAL INNOVATIVENESS IN INFORMATION TECHNOLOGY; RISK; TRUST; VIETNAM		FACULTY OF FINANCE AND BANKING, UNIVERSITY OF FINANCE & MARKETING, HO CHI MINH CITY, VIET NAM; FACULTY OF FINANCE AND BANKING, HO CHI MINH CITY OPEN UNIVERSITY, HO CHI MINH CITY, VIET NAM; FACULTY OF FINANCE AND BANKING, INDUSTRIAL UNIVERSITY OF HO CHI MINH CITY, VIET NAM	QUAL. ACCESS SUCCESS	THIS STUDY ANALYSES THE DIMENSIONS OF SELF-SERVICE TECHNOLOGY THAT AFFECT INTENTIONS OF USING E-WALLETS ON MOBILE PLATFORMS. OUR STUDY IS UNIQUE BECAUSE THE COVID-19 PANDEMIC ALTERS CONSUMER INTENTIONS TO USE THE E-WALLET. WE COLLECT DATA FROM 307 VIETNAMESE USERS THROUGH ONLINE QUESTIONNAIRES AND FOCUS GROUP INTERVIEWS. WE ANALYZE THE DATA SAMPLE BY APPLYING THE THEORY OF TECHNOLOGY ACCEPTANCE A…	O.T.T. KIM; FACULTY OF FINANCE AND BANKING, UNIVERSITY OF FINANCE & MARKETING, HO CHI MINH CITY, VIET NAM; EMAIL: KIMOANH@UFM.EDU.VN	10.47750/QAS/24.194.24	15822559	QUALITY - ACCESS TO SUCCESS	ENGLISH	0	194	SRAC - ROMANIAN SOCIETY FOR QUALITY	ISI	THE INTENTIONS TO USE EWALLET SERVICES DURING THE COVID19 PANDEMIC LESSONS FROM VIETNAM	ARTICLE	24	2023	KIM OANH TRAN THI;VAN NGUYEN DIEP;PHAM VAN NGOC	QUAL ACCESS SUCCESS	none	UNIVERSITY OF FINANCE AND MARKETING;HO CHI MINH CITY OPEN UNIVERSITY;INDUSTRIAL UNIVERSITY OF HO CHI MINH CITY	NOTREPORTED;UNIVERSITY OF FINANCE AND MARKETING;NOTREPORTED		KIM OTT, 2023, QUAL ACCESS SUCCESS	KIM OTT, 2023, QUAL ACCESS SUCCESS		KIM OTT, 2023,	wos
KOTNI V;PATRA S;KUMAR S			GITAM SCHOOL OF BUSINESS, GITAM UNIVERSITY, INDIA; JAIPURIA INSTITUTE OF MANAGEMENT, LUCKNOW, INDIA	DIGIT. CURR. ASSETS AND CHALL. TO FINANC. SYST. STAB.	THE EMERGENCE OF DIGITAL FINANCE WAS TAKEN TO THE NEXT LEVEL BY THE WORLD ECONOMY DUE TO COVID-19 SITUATION. THE ADOPTION OF DIGITAL WALLETS BY THE CITIZENS OF ADVANCED COUNTRIES, AS WELL AS ADVANCING COUNTRIES, HAS BEEN DRASTICALLY INCREASED IN THE PAST DECADE LONG WITH DIGITAL WALLETS RESEARCH. THE AIM OF THIS RESEARCH IS TO PRODUCE A COMPREHENSIVE ANALYSIS ON DIGITAL WALLET RESEARCH AND TO PRO…		10.4018/9798369307700.ch001		DIGITAL CURRENCY ASSETS AND CHALLENGES TO FINANCIAL SYSTEM STABILITY	ENGLISH	0		IGI GLOBAL	ISI	BIBLIOMETRIC ANALYSIS ON DIGITAL WALLETS CURRENT RESEARCH STATUS AND FUTURE RESEARCH DIRECTIONS	BOOK CHAPTER		2024	KOTNI VV DEVI PRASAD;PATRA SUJIT KUMAR;KUMAR SUNIL	DIGIT CURR ASSETS AND CHALL TO FINANC SYST STAB	none	GITAM UNIVERSITY;JAIPURIA INSTITUTE OF MANAGEMENT	GITAM UNIVERSITY;JAIPURIA INSTITUTE OF MANAGEMENT		KOTNI VVDP, 2024, DIGIT CURR ASSETS AND CHALL TO FINANC SYST STAB	KOTNI VVDP, 2024, DIGIT CURR ASSETS AND CHALL TO FINANC SYST STAB	INDIA	KOTNI VVDP, 2024,	wos
ALKADI R;ABED S	CONSUMER; FINTECH; ISLAMIC FINTECH; LITERATURE REVIEW; MOBILE PAYMENT		FINANCE DEPARTMENT, COLLEGE OF BUSINESS, KING ABDULAZIZ UNIVERSITY, RABIGH, 21911, SAUDI ARABIA; DEPARTMENT OF MANAGEMENT INFORMATION SYSTEMS, COLLEGE OF BUSINESS, KING ABDULAZIZ UNIVERSITY, RABIGH, 21911, SAUDI ARABIA	J. THEOR. APPL. ELECTRON. COMMER. RES.	THIS RESEARCH HAS UNDERTAKEN A SYSTEMATIC LITERATURE REVIEW (SLR) OF ARTICLES FOCUSING ON THE ACCEPTANCE OF FINTECH PAYMENT SERVICES BY IDENTIFYING 84 PEER-REVIEWED ARTICLES PUBLISHED IN INTERNATIONAL SCIENTIFIC JOURNALS FROM 2015 TO APRIL 2023. THIS PAPER USES THE SCIENTIFIC PROCEDURES AND RATIONALES FOR SYSTEMATIC LITERATURE REVIEWS (SPAR-4-SLR) PROTOCOL TO GATHER RELEVANT ARTICLES AND THE THEO…	S.S. ABED; DEPARTMENT OF MANAGEMENT INFORMATION SYSTEMS, COLLEGE OF BUSINESS, KING ABDULAZIZ UNIVERSITY, RABIGH, 21911, SAUDI ARABIA; EMAIL: SABID@KAU.EDU.SA	10.3390/jtaer18040093	07181876	JOURNAL OF THEORETICAL AND APPLIED ELECTRONIC COMMERCE RESEARCH	ENGLISH	0	4	MULTIDISCIPLINARY DIGITAL PUBLISHING INSTITUTE (MDPI)	ISI	CONSUMER ACCEPTANCE OF FINTECH APP PAYMENT SERVICES A SYSTEMATIC LITERATURE REVIEW AND FUTURE RESEARCH AGENDA	REVIEW	18	2023	ALKADI ROTANA S;ABED SALMA S	J THEOR APPL ELECTRON COMMER RES	none	KING ABDULAZIZ UNIVERSITY;KING ABDULAZIZ UNIVERSITY	NOTREPORTED;KING ABDULAZIZ UNIVERSITY;NOTREPORTED		ALKADI RS, 2023, J THEOR APPL ELECTRON COMMER RES	ALKADI RS, 2023, J THEOR APPL ELECTRON COMMER RES	SAUDI ARABIA	ALKADI RS, 2023,	wos
LIU Z;STEPANENKO S;PICHON-PHARABOD J;TIMANY A;ASKAROV A;BIRKEDAL L	FF-A; HYPERCALL; IRIS; LOGICAL RELATION; ROBUST SAFETY; SEPARATION LOGIC	BALANCING; CODES (SYMBOLS); COMPUTER CIRCUITS; NETWORK SECURITY; FF-A; FINGERPRINT READER; HYPERCALL; HYPERVISORS; IRIS; KEYCHAIN; LOGICAL RELATIONS; ROBUST SAFETY; SECURITY COMPONENTS; SEPARATION LOGIC; VIRTUAL MACHINE	AARHUS UNIVERSITY, DENMARK	PROC. ACM PROGRAM. LANG.	THIN HYPERVISORS MAKE IT POSSIBLE TO ISOLATE KEY SECURITY COMPONENTS LIKE KEYCHAINS, FINGERPRINT READERS, AND DIGITAL WALLETS FROM THE EASILY-COMPROMISED OPERATING SYSTEM. TO WORK TOGETHER, VIRTUAL MACHINES RUNNING ON TOP OF THE HYPERVISOR CAN MAKE HYPERCALLS TO THE HYPERVISOR TO SHARE PAGES BETWEEN EACH OTHER IN A CONTROLLED WAY. HOWEVER, THE DESIGN OF SUCH HYPERCALL ABIS REMAINS A DELICATE BALA…		10.1145/3591279	24751421	PROCEEDINGS OF THE ACM ON PROGRAMMING LANGUAGES	ENGLISH	1		ASSOCIATION FOR COMPUTING MACHINERY	ISI	VMSL A SEPARATION LOGIC FOR MECHANISED ROBUST SAFETY OF VIRTUAL MACHINES COMMUNICATING ABOVE FFA	ARTICLE	7	2023	LIU ZONGYUAN;STEPANENKO SERGEI;PICHON-PHARABOD JEAN;TIMANY AMIN;ASKAROV ASLAN;BIRKEDAL LARS	PROC ACM PROGRAM LANG	none	AARHUS UNIVERSITY	AARHUS UNIVERSITY		LIU Z, 2023, PROC ACM PROGRAM LANG	LIU Z, 2023, PROC ACM PROGRAM LANG	DENMARK	LIU Z, 2023,	wos
CIUCCIOVINO D;TOSCANO A;FAIOLI M	METAPPRENDO; NCBA METALWORKERS; PROFESSIONAL TRAINING; SOCIAL BLOCKCHAIN; WORKERS’ DIGITAL WALLET		UNIVERSITÀ DEGLI STUDI ROMA TRE, ITALY; UNIVERSITÀ CATTOLICA DEL SACRO CUORE, ITALY	FEDERALISMI.	WITH AN INTERDISCIPLINARY APPROACH THIS ESSAY INVESTIGATES THE IMPLEMENTATION OF A SOCIAL BLOCKCHAIN THAT HAS THE FORM OF A DIGITAL WALLET CREATED FOR THE METALWORKERS SUBJECT TO THE 2021 NCBA AND THE RELATED PARITIARIAN INSTITUTION METAPPRENDO. THIS IS CONSIDERED A SPECIAL PILOT PROJECT AIMED AT MODERNIZING THE LABOR MARKET ACTIVATION AND THE APPLICATION OF PERSON-CENTRIC. SECTION 3 DESCRIBES, U…			18263534	FEDERALISMI.IT	ITALIAN	1	4	SOCIETA EDITORIALE FEDERALISMI S.R.L.	ISI	METAPPRENDO THE FIRST LARGESCALE SOCIAL BLOCKCHAIN CASE CONTINUOUS TRAINING COLLECTIVE BARGAINING AND DIGITAL INNOVATION ASPECTS METAPPRENDO IL PRIMO CASO DI SOCIAL BLOCKCHAIN SU LARGA SCALA FORMAZIONE CONTINUA CONTRATTAZIONE COLLETTIVA E ASPETTI DI INNOVAZIONE DIGITALE	ARTICLE	2023	2023	CIUCCIOVINO DI SILVIA;TOSCANO ALESSANDRO;FAIOLI MICHELE	FEDERALISMI	none	UNIVERSITÀ DEGLI STUDI ROMA TRE;UNIVERSITÀ CATTOLICA DEL SACRO CUORE	UNIVERSITÀ DEGLI STUDI ROMA TRE;UNIVERSITÀ CATTOLICA DEL SACRO CUORE		CIUCCIOVINO DS, 2023, FEDERALISMI	CIUCCIOVINO DS, 2023, FEDERALISMI	ITALY	CIUCCIOVINO DS, 2023,	wos
NYMAN C;EVERTSSON L;HENRIKSON A	COERCIVE CONTROL; DIGITAL WALLET; ECONOMIC ABUSE; INTIMATE PARTNER VIOLENCE; TECHNOLOGY FACILITATED ECONOMIC ABUSE		UMEÅ UNIVERSITY, SWEDEN; MID SWEDEN UNIVERSITY, SWEDEN	J. GENDER-BASED VIOL.	THE AIM IS TO SHOW HOW DIGITAL FINANCIAL SERVICES ARE USED TO PERPETRATE DIGITALLY FACILITATED ECONOMIC ABUSE. THE ARTICLE IS BASED ON INTERVIEWS WITH WOMEN IN SWEDEN WHO ARE SURVIVORS OF INTIMATE PARTNER VIOLENCE AND ECONOMIC ABUSE. THE USE OF DIGITAL FINANCIAL SERVICES IS RAPIDLY EXPANDING AND IN SWEDEN THEY ARE USED BY THE MAJORITY OF THE POPULATION. THEY ARE AVAILABLE ON SMART DEVICES SUCH AS…		10.1332/239868023X16909576356057	23986808	JOURNAL OF GENDER-BASED VIOLENCE	ENGLISH	2	3	BRISTOL UNIVERSITY PRESS	ISI	DIGITALLY FACILITATED ECONOMIC ABUSE IN THE AGE OF DIGITAL FINANCIAL SERVICES NEW RISKS FOR ECONOMIC ABUSE IN INTIMATE PARTNER VIOLENCE	ARTICLE	7	2023	NYMAN CHARLOTT;EVERTSSON LARS;HENRIKSON ANN-SOFIE	J GENDER-BASED VIOL	none	UMEÅ UNIVERSITY;MID SWEDEN UNIVERSITY	UMEÅ UNIVERSITY;MID SWEDEN UNIVERSITY		NYMAN C, 2023, J GENDER-BASED VIOL	NYMAN C, 2023, J GENDER-BASED VIOL	SWEDEN	NYMAN C, 2023,	wos
GUMASING M;CANGCO G;ILAGAN S;REYES E	E-WALLET; SATISFACTION RATING; USABILITY	1-SYSTEMS; E-WALLET; GOOGLE+; LIKERT SCALE; ONLINE SURVEYS; OVERALL DESIGN; PHILIPPINES; SATISFACTION RATING; SYSTEM USABILITY; USABILITY; USABILITY ENGINEERING	SCHOOL OF INDUSTRIIAL ENGINEERING AND ENGINEERING MANAGEMENT, MAPUA UNIVERSITY, MANILA, PHILIPPINES	ACM INT. CONF. PROC. SER.	THE USE OF DIGITAL E-WALLETS IS PREVALENT IN THE PHILIPPINES AS PEOPLE INTEND TO PAY WITHOUT USING PHYSICAL MONEY OR BANK-ISSUED CARDS. THIS STUDY AIMS TO DETERMINE THE USABILITY OF GCASH, MAYA, AND GRABPAY AND THE SATISFACTION OF ITS USERS. IT ALSO INTENDS TO DETERMINE THE BEST E-WALLET IN TERMS OF USABILITY AND SATISFACTION. AN ONLINE SURVEY WAS DISTRIBUTED THROUGH GOOGLE FORMS TO 165 E-WALLET …		10.1145/3588243.3588253		ACM INTERNATIONAL CONFERENCE PROCEEDING SERIES	ENGLISH	0		ASSOCIATION FOR COMPUTING MACHINERY	ISI	A COMPARISON ON THE USABILITY OF MOBILE EWALLET APPLICATIONS GCASH MAYA GRABPAY	CONFERENCE PAPER		2023	GUMASING MA JANICE J;CANGCO GEROME KAYE M;ILAGAN SHIELA MAE C;REYES EUNICE GABRIELLE A	ACM INT CONF PROC SER	none	MAPUA UNIVERSITY	MAPUA UNIVERSITY		GUMASING MJJ, 2023, ACM INT CONF PROC SER	GUMASING MJJ, 2023, ACM INT CONF PROC SER	PHILIPPINES	GUMASING MJJ, 2023,	wos
GOMAA A;GOMAA M;BOUMEDIENE S;FARAG M	ACCOUNTING LEDGER; BLOCKCHAIN; RECONCILIATION		THE UNIVERSITY OF SCRANTON, KANIA SCHOOL OF MANAGEMENT, DEPARTMENT OF OPERATIONS AND ANALYTICS, SCRANTON, PA, UNITED STATES; CALIFORNIA STATE POLYTECHNIC UNIVERSITY, COLLEGE OF BUSINESS ADMINISTRATION, DEPARTMENT OF ACCOUNTING, POMONA, CA, UNITED STATES; UNIVERSITY OF ILLINOIS SPRINGFIELD, COLLEGE OF BUSINESS AND MANAGEMENT, DEPARTMENT OF ACCOUNTING, ECONOMICS, AND FINANCE, SPRINGFIELD, IL, UNITE…	J. EMERG. TECHNOL. ACCOUNT.	RECONCILIATION OF TRANSACTIONS BETWEEN MULTIPLE PARTIES IS A TIME-CONSUMING PROCESS. THIS PAPER PRESENTS A NEW CONCEPTUAL FRAMEWORK THAT MAY LOWER COSTS AND SHORTEN THE RECONCILIATION TIME. THE PROPOSED FRAMEWORK RECOMMENDS RECORDING TRANSACTIONS ON THE BLOCKCHAIN BEFORE POPULATING THE TRANSACTING PARTIES’ RESPECTIVE ENTERPRISE RESOURCE PLANNING (ERP) SYSTEMS, WHICH WILL BE THE SOURCE OF A SINGLE…		10.2308/JETA-19-06-01-28	15541908	JOURNAL OF EMERGING TECHNOLOGIES IN ACCOUNTING	ENGLISH	2	1	AMERICAN ACCOUNTING ASSOCIATION	ISI	THE CREATION OF ONE TRUTH SINGLELEDGER ENTRIES FOR MULTIPLE STAKEHOLDERS USING BLOCKCHAIN TECHNOLOGY TO ADDRESS THE RECONCILIATION PROBLEM	ARTICLE	20	2023	GOMAA AHMED A;GOMAA MOHAMED I;BOUMEDIENE SALEM L;FARAG MAGDY S	J EMERG TECHNOL ACCOUNT	none	THE UNIVERSITY OF SCRANTON;CALIFORNIA STATE POLYTECHNIC UNIVERSITY;UNIVERSITY OF ILLINOIS SPRINGFIELD	THE UNIVERSITY OF SCRANTON;CALIFORNIA STATE POLYTECHNIC UNIVERSITY;UNIVERSITY OF ILLINOIS SPRINGFIELD		GOMAA AA, 2023, J EMERG TECHNOL ACCOUNT	GOMAA AA, 2023, J EMERG TECHNOL ACCOUNT	USA	GOMAA AA, 2023,	wos
HAMMOURI Q;ALOQOOL A;SALEH B;ALDOSSARY H;AL F S;HALIM M;ALMAJALI D;AL-GASAWNEH J;DARAWSHEH S	BEHAVIORAL INTENTION; E-WALLETS; FINTECH; JORDAN; PERCEIVED TRUST; UTAUT MODEL		APPLIED SCIENCE PRIVATE UNIVERSITY, JORDAN; MIDDLE EAST UNIVERSITY, JORDAN; ARAB AMERICAN UNIVERSITY, PALESTINE; ABDULRAHMAN BIN FAISAL UNIVERSITY, SAUDI ARABIA; UNIVERSITY OF JORDAN, JORDAN; IMAM ABDULRAHMAN BIN FAISAL UNIVERSITY, SAUDI ARABIA	INT. J. DATA NETW. SCI.	THE INCREASING POPULARITY OF SMARTPHONES HAS LED TO THE RISE OF E-WALLETS, WHICH ALLOW USERS TO STORE THEIR PAYMENT INFORMATION ON THEIR DEVICES AND COMPLETE FINANCIAL TRANSACTIONS CONVENIENTLY AND SECURELY. THIS RESEARCH EXTENDED THE UNIFIED THEORY OF ACCEPTANCE AND USE OF TECHNOLOGY (UTAUT2) MODEL TO INVESTIGATE THE MAIN FACTORS INFLUENCING USERS’ INTENTION TO ACCEPT E-WALLETS IN JORDAN, WHERE …	Q. HAMMOURI; APPLIED SCIENCE PRIVATE UNIVERSITY, JORDAN; EMAIL: Q_ALHAMMOURI@ASU.EDU.JO	10.5267/j.ijdns.2023.4.013	25618148	INTERNATIONAL JOURNAL OF DATA AND NETWORK SCIENCE	ENGLISH	10	3	GROWING SCIENCE	ISI	AN EMPIRICAL INVESTIGATION ON ACCEPTANCE OF EWALLETS IN THE FINTECH ERA IN JORDAN EXTENDING UTAUT2 MODEL WITH PERCEIVED TRUST	ARTICLE	7	2023	HAMMOURI QAIS;ALOQOOL ABDALRAZZAQ;SALEH BESAN ABDALLAH;ALDOSSARY HADEEL;AL FREJAT SALEH YAHYA;HALIM MONA;ALMAJALI DMAITHAN ABDELKARIM;AL-GASAWNEH JASSIM AHMAD;DARAWSHEH SAD-DAM RATEB	INT J DATA NETW SCI	none	APPLIED SCIENCE PRIVATE UNIVERSITY;MIDDLE EAST UNIVERSITY;ARAB AMERICAN UNIVERSITY;ABDULRAHMAN BIN FAISAL UNIVERSITY;UNIVERSITY OF JORDAN;IMAM ABDULRAHMAN BIN FAISAL UNIVERSITY	NOTREPORTED;APPLIED SCIENCE PRIVATE UNIVERSITY;NOTREPORTED		HAMMOURI Q, 2023, INT J DATA NETW SCI	HAMMOURI Q, 2023, INT J DATA NETW SCI	SAUDI ARABIA	HAMMOURI Q, 2023,	wos
BAXI C;PATEL K;PATEL K;PATEL V;ACHARYA V	ADOPTION; CONFIRMATORY FACTOR ANALYSIS (CFA); DIGITAL PAYMENT; STRUCTURAL EQUATION MODELING (SEM); TTF; UNIFIED THEORY OF ACCEPTANCE; USE OF TECHNOLOGY		V. M. PATEL INSTITUTE OF MANAGEMENT, MBA DEPARTMENT, GANPAT UNIVERSITY, GUJARAT, INDIA; V. M. PATEL COLLEGE OF MANAGEMENT STUDIES, GANPAT UNIVERSITY, GUJARAT, INDIA	INT. J. ASIAN BUS. INF. MANAG.	THIS EMPIRICAL STUDY AIMS TO EXAMINE WHAT DRIVES CONSUMERS’ BEHAVIORAL INTENTION TO ADOPT DIGITAL WALLET BY INTEGRATING TASK TECHNOLOGY FIT THEORY INTO UTAUT MODEL. FOR THIS PURPOSE, 700 SAMPLES WERE APPROACHED THROUGH EMAILS, OUT OF WHICH 479 VALID RESPONSES WERE SOLICITED. TO TEST AND VALIDATE THE PROPOSED RESEARCH MODEL, CFA AND SEM WERE PERFORMED USING AMOS 20. THE RESULTS OF THIS STUDY HIGHL…		10.4018/IJABIM.334016	19479638	INTERNATIONAL JOURNAL OF ASIAN BUSINESS AND INFORMATION MANAGEMENT	ENGLISH	1	1	IGI GLOBAL	ISI	CONSUMERS DIGITAL WALLET ADOPTION INTEGRATION OF TECHNOLOGY TASK FIT AND UTAUT	ARTICLE	15	2023	BAXI CHINMAY O;PATEL KIRAN J;PATEL KUNDAN M;PATEL VIPUL B;ACHARYA VISHAL A	INT J ASIAN BUS INF MANAG	none	GANPAT UNIVERSITY;GANPAT UNIVERSITY	GANPAT UNIVERSITY;GANPAT UNIVERSITY		BAXI CO, 2023, INT J ASIAN BUS INF MANAG	BAXI CO, 2023, INT J ASIAN BUS INF MANAG	INDIA	BAXI CO, 2023,	wos
BASMANTRA I;PARANEGARA A;CANDRA S		ELECTRONIC MONEY; FINANCE; DIGITAL WALLETS; E- COMMERCES; FINANCIAL LITERACY; INDONESIA; INDUSTRIAL REVOLUTIONS; PAYMENT MECHANISM; PAYMENT SYSTEMS; SERVICE PROVIDER; SMART PHONES; SYSTEM REGULATION; DIGITAL DEVICES	FACULTY OF ECONOMIC AND BUSINESS, UNIVERSITAS PENDIDIKAN NASIONAL, JL. BEDUGUL NO.39, SIDAKARYA, DENPASAR SELATAN, BALI, KOTA DENPASAR, 80224, INDONESIA; BINA NUSANTARA UNIVERSITY, JL. HANG LEKIR I NO.6, RT.1/RW.3, SENAYAN, KEC. KBY. BARU, DAERAH KHUSUS IBUKOTA JAKARTA, PUSAT, KOTA JAKARTA, 10270, INDONESIA	LECT. NOTES NETWORKS SYST.	THE FOURTH INDUSTRIAL REVOLUTION, WHICH IS CAUSED BY RAPID TECHNICAL BREAKTHROUGHS HAS DISRUPTED NEARLY EVERY INDUSTRY AND RESULTED IN THE WIDESPREAD USE OF THE INTERNET, SOCIAL NETWORKS, AND DIGITAL DEVICES. SINCE THE INTRODUCTION OF E-COMMERCE, DIGITAL PAYMENT MECHANISMS HAVE EVOLVED INTO DIGITAL WALLETS OR E-WALLETS. THE POPULARITY OF DIGITAL PAYMENTS IS GROWING DUE TO A VARIETY OF CAUSES, INC…	I.N. BASMANTRA; FACULTY OF ECONOMIC AND BUSINESS, UNIVERSITAS PENDIDIKAN NASIONAL, KOTA DENPASAR, JL. BEDUGUL NO.39, SIDAKARYA, DENPASAR SELATAN, BALI, 80224, INDONESIA; EMAIL: BASMANTRA@UNDIKNAS.AC.ID	10.1007/978-3-031-55911-2_33	23673370	LECTURE NOTES IN NETWORKS AND SYSTEMS	ENGLISH	0		SPRINGER SCIENCE AND BUSINESS MEDIA DEUTSCHLAND GMBH	ISI	THE ROLE OF EWALLET USE AND FINANCIAL LITERACY ON CONSUMPTIVE BEHAVIOR IN INDONESIA	CONFERENCE PAPER	923 LNNS	2024	BASMANTRA IDA NYOMAN;PARANEGARA ANAK AGUNG NGURAH YAMA VIKARA;CANDRA SEVENPRI	LECT NOTES NETWORKS SYST	none	UNIVERSITAS PENDIDIKAN NASIONAL;BINA NUSANTARA UNIVERSITY	NOTREPORTED;UNIVERSITAS PENDIDIKAN NASIONAL;NOTREPORTED		BASMANTRA IN, 2024, LECT NOTES NETWORKS SYST	BASMANTRA IN, 2024, LECT NOTES NETWORKS SYST	INDONESIA	BASMANTRA IN, 2024,	wos
AMANKWA E;AMISSAH G;OKOAMPA-LARBI R	ATTITUDE; CASHLESS ECONOMY; COVID-19; E-WALLET; INTENTIONS; MOBILE MONEY; PERCEIVED SEVERITY; PERCEIVED SUSCEPTIBILITY; SUBJECTIVE NORM; THEORY OF PLANNED BEHAVIOUR		DEPARTMENT OF ICT, PRESBYTERIAN UNIVERSITY GHANA, ABETIFI, GHANA	J. SCI. TECHNOL. POLICY MANAGE.	PURPOSE: THE PURPOSE OF THIS STUDY IS TO OFFER A CONCEPTUAL MODEL THAT BRIDGES GAPS IN THE CURRENT RESEARCH BY COMBINING CONSTRUCTS FROM THE HEALTH BELIEF MODEL (HBM) AND THEORY OF PLANNED BEHAVIOUR (TPB). FURTHERMORE, THE RESEARCHERS APPLIED THE CONSTRUCTED MODEL TO ANALYSE THE DETERMINANTS OF WORKERS’ INTENTIONS TO USE E-WALLET PAYMENT OPTIONS FOR BUSINESS TRANSACTIONS RATHER THAN PHYSICAL CURR…	E. AMANKWA; DEPARTMENT OF ICT, PRESBYTERIAN UNIVERSITY GHANA, ABETIFI, GHANA; EMAIL: AMANKWA@PRESBYUNIVERSITY.EDU.GH	10.1108/JSTPM-09-2021-0137	20534620	JOURNAL OF SCIENCE AND TECHNOLOGY POLICY MANAGEMENT	ENGLISH	1	6	EMERALD PUBLISHING	ISI	CASHLESS ECONOMY THE NEXUS OF COVID19 AND EWALLET USAGE INTENTIONS A MULTIGROUP ANALYSIS BETWEEN FORMAL AND INFORMAL SECTOR WORKERS IN GHANA	ARTICLE	14	2023	AMANKWA ERIC;AMISSAH GODFRED;OKOAMPA-LARBI RICHARD	J SCI TECHNOL POLICY MANAGE	none	PRESBYTERIAN UNIVERSITY GHANA	NOTREPORTED;PRESBYTERIAN UNIVERSITY GHANA;EMAIL: AMANKWA@PRESBYUNIVERSITY.EDU.GH		AMANKWA E, 2023, J SCI TECHNOL POLICY MANAGE	AMANKWA E, 2023, J SCI TECHNOL POLICY MANAGE	GHANA	AMANKWA E, 2023,	wos
OKONKWO C;AMUSA L;TWINOMURINZI H;FOSSO W S	ADOPTION; CASH-BASED ECONOMIES; COVID-19; MOBILE WALLETS	LEAST SQUARES APPROXIMATIONS; ADOPTION; CASH-BASED ECONOMY; COMPOSITE MODELLING; CONTACT LESS; DESIGN/METHODOLOGY/APPROACH; DIFFUSIONS OF INNOVATION THEORIES; FINANCIAL TRANSACTIONS; MOBILE WALLET; MODEL-BASED OPC; TECHNOLOGY ACCEPTANCE MODEL; COVID-19	CENTRE FOR APPLIED DATA SCIENCE, UNIVERSITY OF JOHANNESBURG, JOHANNESBURG, SOUTH AFRICA; TOULOUSE BUSINESS SCHOOL, MIDI-PYRÉNÉES, FRANCE	IND MANAGE DATA SYS	PURPOSE: THE CORONAVIRUS DISEASE 2019 (COVID-19) PANDEMIC ALTERED BUSINESS AND PERSONAL ACTIVITIES GLOBALLY ESPECIALLY STIMULATING CONTACTLESS FINANCIAL TRANSACTIONS. HOWEVER, DESPITE THE SIMILAR NATIONAL LOCKDOWNS IN CASH-BASED ECONOMIES, THE ADOPTION OF CONTACTLESS TRANSACTIONS THROUGH THE WIDELY AVAILABLE MECHANISM, MOBILE WALLETS, REMAINED LOW. THIS RESEARCH AIMED TO IDENTIFY THE FACTORS SURR…	C.W. OKONKWO; CENTRE FOR APPLIED DATA SCIENCE, UNIVERSITY OF JOHANNESBURG, JOHANNESBURG, SOUTH AFRICA; EMAIL: CHINEDUO@UJ.AC.ZA	10.1108/IMDS-01-2022-0029	02635577	INDUSTRIAL MANAGEMENT AND DATA SYSTEMS	ENGLISH	7	2	EMERALD PUBLISHING	ISI	MOBILE WALLETS IN CASHBASED ECONOMIES DURING COVID19	ARTICLE	123	2023	OKONKWO CHINEDU WILFRED;AMUSA LATEEF BABATUNDE;TWINOMURINZI HOSSANA;FOSSO WAMBA SAMUEL	IND MANAGE DATA SYS	none	UNIVERSITY OF JOHANNESBURG;TOULOUSE BUSINESS SCHOOL	NOTREPORTED;UNIVERSITY OF JOHANNESBURG;NOTREPORTED		OKONKWO CW, 2023, IND MANAGE DATA SYS	OKONKWO CW, 2023, IND MANAGE DATA SYS	FRANCE	OKONKWO CW, 2023,	wos
AKANFE O;VALECHA R;RAO H;ALAMRI M;YKHLEF M	COMPLIANCE INDEX; DIGITAL PAYMENT SYSTEMS (DPS); EMPHASIS DENSITY SCORE; MOBILE WALLET AND REMITTANCE (MWR); PRIVACY POLICIES; PRIVACY SCORE; TOPIC MODELS;ANOMALY DETECTION; CREDIT CARD; FRAUD DETECTION; MACHINE LEARNING; OPTIMIZATION; SAMPLING TECHNIQUES	GLOBAL SYSTEM FOR MOBILE COMMUNICATIONS; INVERSE PROBLEMS; MODELING LANGUAGES; NATURAL LANGUAGE PROCESSING SYSTEMS; STATISTICS; TEXT PROCESSING; COMPLIANCE INDEX; DIGITAL PAYMENT SYSTEM; EMPHASIS DENSITY SCORE; GENERAL DATA PROTECTION REGULATIONS; MOBILE WALLET AND REMITTANCE; PAYMENT SYSTEMS; PRIVACY LAW; PRIVACY POLICIES; PRIVACY SCORE; TOPIC MODELING; DATA PRIVACY;CLUSTERING ALGORITHMS; CRIME;…	UNIVERSITY OF TEXAS, DEPARTMENT OF INFORMATION SYSTEMS AND CYBERSECURITY, SAN ANTONIO, 78249, TX, UNITED STATES; UNIVERSITY OF BUFFALO, BUFFALO, 14260, NY, UNITED STATES;KING SAUD UNIVERSITY, COLLEGE OF COMPUTER AND INFORMATION SCIENCES, DEPARTMENT OF INFORMATION SYSTEMS, RIYADH, SAUDI ARABIA	IEEE TRANS ENG MANAGE INT. CONF. INF. TECHNOL., IT	MANY NATIONS HAVE ADOPTED COMPREHENSIVE DATA PRIVACY LAWS TO PROTECT CUSTOMERS' DATA. HOWEVER, PRIVACY POLICIES OF MOBILE WALLET DIGITAL PAYMENT SYSTEMS (DPS), AND PARTICULARLY THE MOBILE WALLET AND REMITTANCE SERVICES THAT ARE PART OF DPS, ARE OFTEN NOT COMPLIANT WITH PRIVACY LAWS. THERE IS A LACK OF MEASURES TO ASSESS HOW ADEQUATE THE POLICIES ARE IN ADDRESSING DATA PRIVACY ISSUES. TO ADDRESS T…	O. AKANFE; UNIVERSITY OF TEXAS, DEPARTMENT OF INFORMATION SYSTEMS AND CYBERSECURITY, SAN ANTONIO, 78249, UNITED STATES; EMAIL: OLUWAFEMI.AKANFE@UTSA.EDU M.A. ALAMRI; KING SAUD UNIVERSITY, COLLEGE OF COMPUTER AND INFORMATION SCIENCES, DEPARTMENT OF INFORMATION SYSTEMS, RIYADH, SAUDI ARABIA; EMAIL: MAALAMRI@KSU.EDU.SA	10.1109/TEM.2020.3015222 10.1109/IT57431.2023.10078528	00189391	IEEE TRANSACTIONS ON ENGINEERING MANAGEMENT 2023 27TH INTERNATIONAL CONFERENCE ON INFORMATION TECHNOLOGY, IT 2023	ENGLISH ENGLISH	4	3	INSTITUTE OF ELECTRICAL AND ELECTRONICS ENGINEERS INC. INSTITUTE OF ELECTRICAL AND ELECTRONICS ENGINEERS INC.	ISI	DESIGN OF A COMPLIANCE INDEX FOR PRIVACY POLICIES A STUDY OF MOBILE WALLET AND REMITTANCE SERVICES A MACHINE LEARNINGBASED FRAMEWORK FOR DETECTING CREDIT CARD ANOMALIES AND FRAUD	ARTICLE CONFERENCE PAPER	70	2023	AKANFE OLUWAFEMI;VALECHA ROHIT;RAO H RAGHAV;ALAMRI MARAM A;YKHLEF MOURAD A	IEEE TRANS ENG MANAGE INT CONF INF TECHNOL, IT	none	UNIVERSITY OF TEXAS;UNIVERSITY OF BUFFALO;KING SAUD UNIVERSITY	NOTREPORTED;UNIVERSITY OF TEXAS;NOTREPORTED;KING SAUD UNIVERSITY;NOTREPORTED		AKANFE O, 2023, IEEE TRANS ENG MANAGE INT CONF INF TECHNOL, IT	AKANFE O, 2023, IEEE TRANS ENG MANAGE INT CONF INF TECHNOL, IT	SAUDI ARABIA	AKANFE O, 2023, IEEE TRANS ENG MANAGE INT CONF INF TECHNOL,	wos
GHAZALI M;LEONG T	FINANCIAL INCLUSION; REFUGEES; ROHINGYAS		FACULTY OF ENTREPRENEURSHIP AND BUSINESS, UNIVERSITI MALAYSIA KELANTAN, KOTA BHARU, MALAYSIA; ARSHAD AYUB GRADUATE BUSINESS SCHOOL, UNIVERSITI TEKNOLOGI MARA, SELANGOR, MALAYSIA	LECT. NOTES NETWORKS SYST.	THIS ARTICLE PROVIDES A CRITICAL EXAMINATION OF THE CURRENT EXTENSIVE PROMOTION OF ‘FINANCIAL INCLUSION FOR REFUGEES’. THE CURRENT SYSTEM LARGELY IGNORES REFUGEES FROM THE MARKETPLACE, AND THEY ARE NOT VERY VISIBLE IN THEIR HOST COUNTRY FINANCIAL SERVICE PROVIDERS, PARTICULARLY IN THE MALAYSIA NARRATIVE. THIS ARTICLE ESTABLISHES FINANCIAL PROFILING, EXAMINING THE POSSIBLE FINANCIAL INCLUSION OF U…	M.S. GHAZALI; FACULTY OF ENTREPRENEURSHIP AND BUSINESS, UNIVERSITI MALAYSIA KELANTAN, KOTA BHARU, MALAYSIA; EMAIL: SAFWAN.G@UMK.EDU.MY	10.1007/978-3-031-08084-5_49	23673370	LECTURE NOTES IN NETWORKS AND SYSTEMS	ENGLISH	0		SPRINGER SCIENCE AND BUSINESS MEDIA DEUTSCHLAND GMBH	ISI	FINANCIAL PROFILING AND POSSIBLE FINANCIAL INCLUSION OF ROHINGYA REFUGEES IN MALAYSIA	CONFERENCE PAPER	487	2023	GHAZALI MOHD SAFWAN;LEONG TAN PECK	LECT NOTES NETWORKS SYST	none	UNIVERSITI MALAYSIA KELANTAN;UNIVERSITI TEKNOLOGI MARA	NOTREPORTED;UNIVERSITI MALAYSIA KELANTAN;NOTREPORTED		GHAZALI MS, 2023, LECT NOTES NETWORKS SYST	GHAZALI MS, 2023, LECT NOTES NETWORKS SYST	MALAYSIA	GHAZALI MS, 2023,	wos
SENALI M;IRANMANESH M;ISMAIL F;RAHIM N;KHOSHKAM M;MIRZAEI M		BEHAVIORAL RESEARCH; COMMERCE; CONCEPTUAL FRAMEWORKS; EMPIRICAL STUDIES; INTENTION TO USE; MALAYSIANS; PERCEIVED EASE-OF-USE; PERCEIVED RISK; PERCEIVED USEFULNESS; PERSONAL INNOVATIVENESS; RELATED FACTORS; TECHNOLOGY ACCEPTANCE MODEL; LEAST SQUARES APPROXIMATIONS	SCHOOL OF BUSINESS AND LAW, EDITH COWAN UNIVERSITY, JOONDALUP, WA, AUSTRALIA; GRADUATE SCHOOL OF BUSINESS, UNIVERSITI SAINS MALAYSIA, PENANG, MALAYSIA; DEPARTMENT OF MANAGEMENT, FACULTY OF TOURISM AND HOSPITALITY MANAGEMENT, WEST TEHRAN BRANCH, ISLAMIC AZAD UNIVERSITY, TEHRAN, IRAN; HEALTH AND INDUSTRY RESEARCH CENTRE, WEST TEHRAN BRANCH, ISLAMIC AZAD UNIVERSITY, TEHRAN, IRAN; FACULTY OF BUSINESS…	INT. J. HUM.-COMPUT. INTERACT.	THIS STUDY AIMS TO INVESTIGATE THE DETERMINANTS OF INTENTION TO USE E-WALLETS. DRAWING ON THE TECHNOLOGY ACCEPTANCE MODEL (TAM), THE CONCEPTUAL FRAMEWORK WAS DEVELOPED. THE STUDY EXTENDS THE TAM IN THE CONTEXT OF E-WALLETS, BY TESTING THE INFLUENCES OF PRODUCT-RELATED FACTORS NAMELY PERCEIVED COMPATIBILITY, PERCEIVED RISK, AND PERCEIVED EMOTIONS AND INVESTIGATING THE MODERATING IMPACTS OF PERSONA…	M. IRANMANESH; SCHOOL OF BUSINESS AND LAW, EDITH COWAN UNIVERSITY, JOONDALUP, 6027, AUSTRALIA; EMAIL: M.IRANMANESH@ECU.EDU.AU	10.1080/10447318.2022.2076309	10447318	INTERNATIONAL JOURNAL OF HUMAN-COMPUTER INTERACTION	ENGLISH	28	12	TAYLOR AND FRANCIS LTD.	ISI	DETERMINANTS OF INTENTION TO USE EWALLET PERSONAL INNOVATIVENESS AND PROPENSITY TO TRUST AS MODERATORS	ARTICLE	39	2023	SENALI MADUGODA GUNARATNEGE;IRANMANESH MOHAMMAD;ISMAIL FATIN NADZIRAH;RAHIM NOOR FAREEN ABDUL;KHOSHKAM MANA;MIRZAEI MARYAM	INT J HUM-COMPUT INTERACT	none	EDITH COWAN UNIVERSITY;UNIVERSITI SAINS MALAYSIA;ISLAMIC AZAD UNIVERSITY;ISLAMIC AZAD UNIVERSITY;GERMAN UNIVERSITY OF TECHNOLOGY IN OMAN	NOTREPORTED;EDITH COWAN UNIVERSITY;NOTREPORTED		SENALI MG, 2023, INT J HUM-COMPUT INTERACT	SENALI MG, 2023, INT J HUM-COMPUT INTERACT	OMAN	SENALI MG, 2023,	wos
RACHMAN M;DURACHMAN Y;KHUDZAEVA E	DELONE AND MCLEAN; E-WALLET; SAKUKU; SATISFACTION EVALUATION	ELECTRONIC COMMERCE; CASE-STUDIES; CENTRAL ASIA; DELONE AND MCLEAN; E-WALLET; EVALUATION OF USERS; FINANCIAL TRANSACTIONS; PAYMENT METHODS; SAKUKU; SATISFACTION EVALUATION; USERS' SATISFACTIONS; SALES	UNIVERSITAS ISLAM NEGERI SYARIF HIDAYATULLAH, DEPARTEMENT OF INFORMATION SYSTEM, TANGERANG SELATAN, JAKARTA, INDONESIA	INT. CONF. CYBER IT SERV. MANAG., CITSM	USER SATISFACTION WILL INCREASE WHEN THE QUALITY OF INFORMATION RELEASED FROM THE INFORMATION SYSTEM ALSO INCREASES. BASED ON DATA COLLECTED BY IPRICE AND JAKPATI, 26% OF THE TOTAL 1,000 RESPONDENTS SAID THEY CHOSE E-WALLETS AS A PAYMENT METHOD WHEN MAKING ONLINE PURCHASES. SAKUKU IS AN E-WALLET PLATFORM ISSUED BY PT. BANK CENTRAL ASIA (BCA) TO PAY FOR PURCHASE TRANSACTIONS, TOP UP BALANCES, AND …	M.D.A. RACHMAN; UNIVERSITAS ISLAM NEGERI SYARIF HIDAYATULLAH, DEPARTEMENT OF INFORMATION SYSTEM, JAKARTA, TANGERANG SELATAN, INDONESIA; EMAIL: DIZZA.ALIEFA19@MHS.UINJKT.AC.ID	10.1109/CITSM60085.2023.10455221		2023 11TH INTERNATIONAL CONFERENCE ON CYBER AND IT SERVICE MANAGEMENT, CITSM 2023	ENGLISH	0		INSTITUTE OF ELECTRICAL AND ELECTRONICS ENGINEERS INC.	ISI	EVALUATION OF USER SATISFACTION WITH MOBILEBASED EWALLET PLATFORMS USING THE DELONE MCLEAN MODEL CASE STUDY SAKUKU	CONFERENCE PAPER		2023	RACHMAN MUHAMMAD DIZZA ALIEFA;DURACHMAN YUSUF;KHUDZAEVA EVA	INT CONF CYBER IT SERV MANAG, CITSM	none	UNIVERSITAS ISLAM NEGERI SYARIF HIDAYATULLAH	NOTREPORTED;UNIVERSITAS ISLAM NEGERI SYARIF HIDAYATULLAH;NOTREPORTED		RACHMAN MDA, 2023, INT CONF CYBER IT SERV MANAG, CITSM	RACHMAN MDA, 2023, INT CONF CYBER IT SERV MANAG, CITSM	INDONESIA	RACHMAN MDA, 2023, INT CONF CYBER IT SERV MANAG,	wos
SARAGIH M;WIDJAJA E;MARCHIA Q	E-CUSTOMER LOYALTY; E-SERVICE QUALITY; ONLINE CUSTOMER EXPERIENCE; ONLINE CUSTOMER SATISFACTION		MANAGEMENT PROGRAM, MANAGEMENT STUDY PROGRAM, BINUS BUSINESS SCHOOL UNDERGRADUATE PROGRAM, BINA NUSANTARA UNIVERSITY, JAKARTA, 11480, INDONESIA	J. SYST. MANAG. SCI.	ALONG WITH THE DEVELOPMENT OF DIGITAL TECHNOLOGY ESPECIALLY IN THE BANKING SECTOR, PEOPLE ARE STARTING TO SWITCH TO USING NON-CASH PAYMENT INSTRUMENTS THAT ARE MORE EFFICIENT AND ECONOMICAL. THIS SHIFT HAS CAUSED MANY COMPANIES TO CREATE E-WALLETS AND COMPETE WITH EACH OTHER IN RETAINING LOYAL CUSTOMERS. THIS RESEARCH WAS CONDUCTED TO DETERMINE THE FACTORS THAT INFLUENCE E-CUSTOMER LOYALTY AND ON…	M.H. SARAGIH; MANAGEMENT PROGRAM, MANAGEMENT STUDY PROGRAM, BINUS BUSINESS SCHOOL UNDERGRADUATE PROGRAM, BINA NUSANTARA UNIVERSITY, JAKARTA, 11480, INDONESIA; EMAIL: MELVA.SARAGIH@BINUS.AC.ID	10.33168/JSMS.2023.0117	18166075	JOURNAL OF SYSTEM AND MANAGEMENT SCIENCES	ENGLISH	1	1	SUCCESS CULTURE PRESS	ISI	EXAMINING THE DETERMINANTS OF SAKUKU USER LOYALTY IN JAKARTA	ARTICLE	13	2023	SARAGIH MELVA HERMAYANTY;WIDJAJA ERNITA;MARCHIA QUEENA	J SYST MANAG SCI	none	BINA NUSANTARA UNIVERSITY	NOTREPORTED;BINA NUSANTARA UNIVERSITY;NOTREPORTED		SARAGIH MH, 2023, J SYST MANAG SCI	SARAGIH MH, 2023, J SYST MANAG SCI	INDONESIA	SARAGIH MH, 2023,	wos
NURCAHYO R;PRABUWONO A;FAINUSA A;WIBOWO N;HABIBURRAHMAN M;HINDRIYANDHITO K			DEPARTMENT OF INDUSTRIAL ENGINEERING, UNIVERSITAS INDONESIA, DEPOK, 16424, INDONESIA; FACULTY OF COMPUTING AND INFORMATION TECHNOLOGY IN RABIGH, KING ABDULAZIZ UNIVERSITY, JEDDAH, 21589, SAUDI ARABIA; RESEARCH CENTER FOR MINING TECHNOLOGY, NATIONAL RESEARCH AND INNOVATION AGENCY REPUBLIC OF INDONESIA (BRIN-RI), KST BJ, HABIBIE SERPONG, SOUTH TANGERANG, 15314, INDONESIA; DEPARTEMENT OF ELECTRONIC …	HUM. BEHAV. EMERG. TECHNOL.	RESEARCH ON USER SATISFACTION IS CRUCIAL BECAUSE IT IS THE KEY TO DIGITAL BUSINESS SUCCESS, INCLUDING E-WALLET IN INDONESIA WHICH IS EXPERIENCING VERY RAPID GROWTH. THIS STUDY IS AIMED AT DETERMINING THE GAP BETWEEN E-WALLET PERCEPTION AND USER EXPECTATIONS, EVALUATING THE LEVEL OF USER SATISFACTION AMONG E-WALLET, AND DETERMINING THE PRIORITY OF IMPROVEMENT OF THE FACTORS THAT AFFECT E-WALLET US…	R. NURCAHYO; DEPARTMENT OF INDUSTRIAL ENGINEERING, UNIVERSITAS INDONESIA, DEPOK, 16424, INDONESIA; EMAIL: RAHMAT@ENG.UI.AC.ID	10.1155/2023/8864865	25781863	HUMAN BEHAVIOR AND EMERGING TECHNOLOGIES	ENGLISH	0		WILEY-HINDAWI	ISI	ENHANCING USER SATISFACTION IN INDONESIAS EWALLET MARKET A COMPREHENSIVE ANALYSIS OF FACTORS AND PRIORITIES	ARTICLE	2023	2023	NURCAHYO RAHMAT;PRABUWONO ANTON SATRIA;FAINUSA AKMAL FATAH;WIBOWO NURHADI;HABIBURRAHMAN MUHAMMAD;HINDRIYANDHITO KHAIRI	HUM BEHAV EMERG TECHNOL	none	UNIVERSITAS INDONESIA;KING ABDULAZIZ UNIVERSITY;RESEARCH CENTER FOR MINING TECHNOLOGY;KOOKMIN UNIVERSITY	NOTREPORTED;UNIVERSITAS INDONESIA;NOTREPORTED		NURCAHYO R, 2023, HUM BEHAV EMERG TECHNOL	NURCAHYO R, 2023, HUM BEHAV EMERG TECHNOL	KOREA	NURCAHYO R, 2023,	wos
ODEH S;SAMARA A;RIZQALLAH R;SHAHEEN L	CHAIN CODE; DIGITAL WALLET; HYPERLEDGER FABRIC; PRIVATE BLOCKCHAIN		SOFTWARE ENGINEERING DEPARTMENT, BETHLEHEM UNIVERSITY, BETHLEHEM, PALESTINE	LECT. NOTES NETWORKS SYST.	RECENTLY, WITH HIGH TECHNOLOGY DEVELOPMENT THE NEED FOR DIGITAL IDENTITY AS PERSONAL IDENTIFICATION HAS BECOME MORE ESSENTIAL AND NOT LIMITED FOR THE CYBERNET WORLD AND CAN ALSO BE USED EVERY DAY IN THE REAL WORLD. MANY POPULAR IDENTITY MANAGEMENT SYSTEMS SUCH AS UPORT, SOVRIN AND SHOCARD USE THE DIGITAL IDENTITY THAT WILL BE COMPARED WITH OUR METHOD. THIS EXTREMELY PERSONAL DATA MUST BE KEPT HID…	S. ODEH; SOFTWARE ENGINEERING DEPARTMENT, BETHLEHEM UNIVERSITY, BETHLEHEM, PALESTINE; EMAIL: SODEH@BETHLEHEM.EDU	10.1007/978-3-031-21229-1_15	23673370	LECTURE NOTES IN NETWORKS AND SYSTEMS	ENGLISH	3		SPRINGER SCIENCE AND BUSINESS MEDIA DEUTSCHLAND GMBH	ISI	DIGITAL IDENTITY USING HYPERLEDGER FABRIC AS A PRIVATE BLOCKCHAINBASED SYSTEM	CONFERENCE PAPER	595 LNNS	2023	ODEH SUHAIL;SAMARA ANAS;RIZQALLAH RAMIZ;SHAHEEN LARA	LECT NOTES NETWORKS SYST	none	BETHLEHEM UNIVERSITY	NOTREPORTED;BETHLEHEM UNIVERSITY;NOTREPORTED		ODEH S, 2023, LECT NOTES NETWORKS SYST	ODEH S, 2023, LECT NOTES NETWORKS SYST		ODEH S, 2023,	wos
TRIANTO B;NIK A N;MASRIZAL M	E-PAYMENT ADOPTION; INDONESIA; MALAYSIA; MICROENTREPRENEURS		STEI IQRA ANNISA, PEKANBARU, INDONESIA; SCHOOL OF MANAGEMENT, UNIVERSITI SAINS MALAYSIA, MINDEN, MALAYSIA; DEPARTMENT OF ISLAMIC ECONOMICS, FACULTY OF ECONOMICS AND BUSINESS, UNIVERSITAS AIRLANGGA, SURABAYA, INDONESIA	J. SCI. TECHNOL. POLICY MANAGE.	PURPOSE: THE DEVELOPMENT OF FINANCIAL TECHNOLOGY (FINTECH), ESPECIALLY DIGITAL PAYMENTS (E-PAYMENTS), AIMS TO INCREASE THE EFFICIENCY AND EFFECTIVENESS OF ECONOMIC TRANSACTIONS. THIS STUDY AIMS TO SEE THE EXTENT TO WHICH MICROENTREPRENEURS IN INDONESIA AND MALAYSIA TAKE ADVANTAGE OF THE EXISTENCE OF E-PAYMENTS IN DEVELOPING THEIR BUSINESS AND THE FACTORS THAT INFLUENCE THE ADOPTION OF E-PAYMENTS.…	B. TRIANTO; STEI IQRA ANNISA, PEKANBARU, INDONESIA; EMAIL: BUDI_ASAMANDIRI@YAHOO.COM	10.1108/JSTPM-12-2022-0207	20534620	JOURNAL OF SCIENCE AND TECHNOLOGY POLICY MANAGEMENT	ENGLISH	2		EMERALD PUBLISHING	ISI	EPAYMENT ADOPTION AND UTILIZATION AMONG MICROENTREPRENEURS A COMPARATIVE ANALYSIS BETWEEN INDONESIA AND MALAYSIA	ARTICLE		2023	TRIANTO BUDI;NIK AZMAN NIK HADIYAN;MASRIZAL MASRIZAL	J SCI TECHNOL POLICY MANAGE	none	UNIVERSITI SAINS MALAYSIA;UNIVERSITAS AIRLANGGA	NOTREPORTED;NOTREPORTED;NOTREPORTED		TRIANTO B, 2023, J SCI TECHNOL POLICY MANAGE	TRIANTO B, 2023, J SCI TECHNOL POLICY MANAGE	INDONESIA	TRIANTO B, 2023,	wos
ABDULLA I;AL-ALAWI A	CASHLESS PAYMENT; DIGITAL TRANSFORMATION; E-WALLET; FINTECH; FOURTH INDUSTRIAL REVOLUTION	ELECTRONIC MONEY; CASHLESS PAYMENT; DIGITAL TRANSFORMATION; E-WALLET; FINANCIAL INDUSTRY; FOURTH INDUSTRIAL REVOLUTION; INDUSTRIAL REVOLUTIONS; INDUSTRIAL SECTOR; LITERATURE REVIEWS; PAYMENT SERVICES; PAYMENT TRANSACTIONS; VIRUSES	UNIVERSITY OF BAHRAIN, DEPARTMENT OF MANAGEMENT AND MARKETING, SAKHIR, BAHRAIN	INT. CONF. CYBER MANAG. ENG., CYMAEN	THE FOURTH INDUSTRIAL REVOLUTION CREATED MANY OPPORTUNITIES IN MANY INDUSTRIAL SECTORS TO COPE WITH THE DIGITAL TRANSFORMATION EMERGENCE. THE FINANCIAL INDUSTRY QUICKLY DEVELOPED MOBILE CASHLESS PAYMENT TRANSACTION SYSTEMS (E-WALLETS) THAT WENT VIRAL AND HAVE BEEN WIDELY USED. COMPARED WITH TRADITIONAL PAYMENT SERVICES, CASHLESS PAYMENTS OFFER OTHER ADVANTAGES ENCOURAGING USERS TO UTILIZE THE TEC…	I.S. ABDULLA; UNIVERSITY OF BAHRAIN, DEPARTMENT OF MANAGEMENT AND MARKETING, SAKHIR, BAHRAIN; EMAIL: ISALAH@UOB.EDU.BH	10.1109/CyMaEn57228.2023.10051026		2023 INTERNATIONAL CONFERENCE ON CYBER MANAGEMENT AND ENGINEERING, CYMAEN 2023	ENGLISH	0		INSTITUTE OF ELECTRICAL AND ELECTRONICS ENGINEERS INC.	ISI	FINTECH IN THE FOURTH INDUSTRIAL REVOLUTION LITERATURE REVIEW ON USAGE AND CONCERNS OF EWALLET PAYMENT TRANSACTIONS	CONFERENCE PAPER		2023	ABDULLA ISRAA SALAH;AL-ALAWI ADEL ISMAIL	INT CONF CYBER MANAG ENG, CYMAEN	none	UNIVERSITY OF BAHRAIN	NOTREPORTED;UNIVERSITY OF BAHRAIN;NOTREPORTED		ABDULLA IS, 2023, INT CONF CYBER MANAG ENG, CYMAEN	ABDULLA IS, 2023, INT CONF CYBER MANAG ENG, CYMAEN	BAHRAIN	ABDULLA IS, 2023, INT CONF CYBER MANAG ENG,	wos
AHMAD A;DAJANI D;ALI N	CONSUMER ADOPTION OF E-WALLET SERVICES; ENVIRONMENTAL DRIVERS; JORDAN; PERCEIVED USEFULNESS	ECONOMIC AND SOCIAL EFFECTS; 'CURRENT; CONSUMER ADOPTION OF E-WALLET SERVICE; CONSUMER ADOPTIONS; DIGITAL WALLETS; ENVIRONMENTAL DRIVER; ENVIRONMENTAL FACTORS; INTENTION TO USE; JORDAN; MEDIATING EFFECT; PERCEIVED USEFULNESS; ENVIRONMENTAL TECHNOLOGY	AL-ZAYTOONAH UNIVERSITY OF JORDAN, AMMAN, JORDAN	STUD. BIG. DATA.	THE CURRENT RESEARCH EXAMINES THE ENVIRONMENTAL DRIVERS OF CONSUMERS’ ADOPTION OF E-WALLET SERVICES. IT INVESTIGATES HOW ENVIRONMENTAL FACTORS, SUCH AS SOCIAL INFLUENCE, TECHNOLOGY READINESS, AND GOVERNMENT SUPPORT AFFECT THE CONSUMERS’ INTENTION TO USE E-WALLET SERVICES. IN ADDITION, THE RESEARCH ASSESSES THE MEDIATING ROLE OF PERCEIVED USEFULNESS IN THIS RELATIONSHIP. DATA WAS COLLECTED THROUGH…	N. ALI; AL-ZAYTOONAH UNIVERSITY OF JORDAN, AMMAN, JORDAN; EMAIL: N.ALI@ZUJ.EDU.JO	10.1007/978-3-031-42455-7_29	21976503	STUDIES IN BIG DATA	ENGLISH	0		SPRINGER SCIENCE AND BUSINESS MEDIA DEUTSCHLAND GMBH	ISI	CONSUMERS ADOPTION OF EWALLET SERVICES IN JORDAN MEDIATING EFFECT OF PERCEIVED USEFULNESS	BOOK CHAPTER	136	2023	AHMAD ALAEDDIN;DAJANI DIMA;ALI NAFEZ	STUD BIG DATA	none	AL-ZAYTOONAH UNIVERSITY OF JORDAN	NOTREPORTED;AL-ZAYTOONAH UNIVERSITY OF JORDAN;NOTREPORTED		AHMAD A, 2023, STUD BIG DATA	AHMAD A, 2023, STUD BIG DATA	JORDAN	AHMAD A, 2023,	wos
SHEHU A;PINTO A;CORREIA M	BLOCKCHAIN; DECENTRALISED IDENTITY; FORWARD SECRECY; MANDATE REPRESENTATION; SECURITY PRIVACY; SELF-SOVEREIGN IDENTITY; SWARM; USER-CENTRED; VERIFIED CREDENTIALS	AUTHENTICATION; DIGITAL STORAGE; INFORMATION MANAGEMENT; NETWORK SECURITY; PRIVACY-PRESERVING TECHNIQUES; BLOCK-CHAIN; DECENTRALISED; DECENTRALIZED IDENTITY; FORWARD SECRECY; MANDATE REPRESENTATION; SECURITY/PRIVACY; SELF-SOVEREIGN IDENTITY; SWARM; USER-CENTRED; VERIFIED CREDENTIAL; BLOCKCHAIN	UNIVERSITY OF PORTO, FACULTY OF SCIENCE, DEPARTMENT OF COMPUTER SCIENCE, PORTO, PORTUGAL; BAYERO UNIVERSITY KANO, FCSIT, DEPARTMENT OF INFORMATION TECHNOLOGY, KANO, NIGERIA; POLITÉCNICO DO PORTO CRACS, INESC TEC, CIICESI, ESTG, PORTO, PORTUGAL; UNIVERSITY OF PORTO CRACS, INESC TEC, FACULTY OF SCIENCE, DEPARTMENT OF COMPUTER SCIENCE, PORTO, PORTUGAL	INT. CONF. SMART APPL., COMMUN. NETW., SMARTNETS	TRADITIONAL IDENTITY MANAGEMENT (IDM) SYSTEMS RELY ON THIRD-PARTY IDENTITY PROVIDERS (IDPS) AND ARE CENTRALISED, WHICH CAN MAKE THEM VULNERABLE TO DATA BREACHES AND OTHER SECURITY RISKS. SELF-SOVEREIGN IDENTITY (SSI) IS A NEWER IDM MODEL THAT ALLOWS USERS TO CONTROL THEIR OWN IDENTITIES BY USING DECENTRALISED TECHNOLOGIES LIKE BLOCKCHAIN TO STORE AND VERIFY THEM. HOWEVER, SSI SYSTEMS HAVE THEIR O…	A.-S. SHEHU; UNIVERSITY OF PORTO, FACULTY OF SCIENCE, DEPARTMENT OF COMPUTER SCIENCE, PORTO, PORTUGAL; EMAIL: MSABUBAKAR-SADIQ.IT@BUK.EDU.NG	10.1109/SmartNets58706.2023.10215588		2023 INTERNATIONAL CONFERENCE ON SMART APPLICATIONS, COMMUNICATIONS AND NETWORKING, SMARTNETS 2023	ENGLISH	1		INSTITUTE OF ELECTRICAL AND ELECTRONICS ENGINEERS INC.	ISI	SPIDVERIFY A SECURE AND PRIVACYPRESERVING DECENTRALISED IDENTITY VERIFICATION FRAMEWORK	CONFERENCE PAPER		2023	SHEHU ABUBAKAR-SADIQ;PINTO ANTONIO;CORREIA MANUEL E	INT CONF SMART APPL, COMMUN NETW, SMARTNETS	none	UNIVERSITY OF PORTO;BAYERO UNIVERSITY KANO;UNIVERSITY OF PORTO CRACS	NOTREPORTED;UNIVERSITY OF PORTO;NOTREPORTED		SHEHU AS, 2023, INT CONF SMART APPL, COMMUN NETW, SMARTNETS	SHEHU AS, 2023, INT CONF SMART APPL, COMMUN NETW, SMARTNETS	PORTUGAL	SHEHU AS, 2023, INT CONF SMART APPL, COMMUN NETW,	wos
CHEN C;CHAN T;HASHIM N	CONTINUATION INTENTION; FINTECH APPLICATIONS; PERCEIVE TECHNOLOGY SECURITY; UNIFIED THEORY OF ACCEPTANCE AND USE OF TECHNOLOGY 2; USER’S PERSPECTIVE		FACULTY OF APPLIED COMMUNICATION, MULTIMEDIA UNIVERSITY, PERSIARAN MULTIMEDIA, SELANGOR, CYBERJAYA, 63100, MALAYSIA; DEPARTMENT OF MANAGEMENT AND MARKETING, FACULTY OF BUSINESS AND ECONOMICS, UNIVERSITI MALAYA, WILAYAH PERSEKUTUAN KUALA LUMPUR, 50603, MALAYSIA	INT. J. TECHNOL.	FINTECH ADOPTION HAS RISEN SIGNIFICANTLY IN ITS USE AND ACCEPTANCE IN MALAYSIA, AS 84.2% OUT OF THE TOTAL POPULATION OF 32.7 MILLION IN MALAYSIA ARE CURRENTLY INTERNET USERS. THE FINTECH SYSTEM HAS BEEN PROVIDING GREATER BENEFITS TO USERS MORE EFFECTIVELY AND EFFICIENTLY IN THIS FAST-PACED ERA, ESPECIALLY WITH THE COLLABORATION OF THREE ENORMOUS E-WALLET COMPANIES (E.G., TOUCH’N GO, BOOST, AND GR…	T.J. CHAN; FACULTY OF APPLIED COMMUNICATION, MULTIMEDIA UNIVERSITY, PERSIARAN MULTIMEDIA, CYBERJAYA, SELANGOR, 63100, MALAYSIA; EMAIL: TJCHAN@MMU.EDU.MY	10.14716/ijtech.v14i6.6636	20869614	INTERNATIONAL JOURNAL OF TECHNOLOGY	ENGLISH	0	6	FACULTY OF ENGINEERING, UNIVERSITAS INDONESIA	ISI	FACTOR INFLUENCING CONTINUATION INTENTION OF USING FINTECH FROM THE USERS PERSPECTIVES TESTING OF UNIFIED THEORY OF ACCEPTANCE AND USE OF TECHNOLOGY UTAUT2	ARTICLE	14	2023	CHEN CAROLINE FE-YEN;CHAN TAK JIE;HASHIM NOR HAZLINA	INT J TECHNOL	none	MULTIMEDIA UNIVERSITY;UNIVERSITI MALAYA	NOTREPORTED;MULTIMEDIA UNIVERSITY;NOTREPORTED		CHEN CFY, 2023, INT J TECHNOL	CHEN CFY, 2023, INT J TECHNOL	MALAYSIA	CHEN CFY, 2023,	wos
GUPTA S;TIWARI S;HASSAN A;GUPTA P	BEHAVIOURAL INTENTIONS; MOBILE WALLETS; PLS-SEM; SATISFACTION; TAM; TRUST		CENTRE FOR MOUNTAIN TOURISM AND HOSPITALITY STUDIES (CMTHS), H.N.B. GARHWAL UNIVERSITY, SRINAGAR, INDIA; UNIVERSITY INSTITUTE OF TOURISM AND HOTEL MANAGEMENT (UITHM), CHANDIGARH UNIVERSITY, PUNJAB, INDIA; GLA UNIVERSITY, UTTAR PRADESH, MATHURA, INDIA; CENTRE FOR MOUNTAIN TOURISM AND HOSPITALITY STUDIES (CMTHS), H.N.B. GARHWAL UNIVERSITY, UTTARAKHAND, SRINAGAR, INDIA	INTL. J. HOSP. TOUR. SYST.	PRESENT STUDY AIMS TO INVESTIGATE THE MODERATING EFFECT OF TECHNOLOGIES INTO BEHAVIOURAL INTENTIONS OF TOURISTS’ TOWARD USE OF MOBILE WALLETS WHILE MAKING DIGITAL PAYMENTS WITH THE HELP OF TECHNOLOGY ACCEPTANCE MODEL (TAM). SAMPLE OF 250 TOURISTS, VISITING THE GARHWAL REGION OF UTTARAKHAND HAS BEEN COLLECTED THROUGH SIMPLE RANDOM SAMPLING TECHNIQUE OVER PREDICTOR VARIABLES; PERCEIVED VALUE (PA), …	S.K. GUPTA; CENTRE FOR MOUNTAIN TOURISM AND HOSPITALITY STUDIES (CMTHS), H.N.B. GARHWAL UNIVERSITY, SRINAGAR, INDIA; EMAIL: SK_GUPTA21@YAHOO.COM		09746250	INTERNATIONAL JOURNAL OF HOSPITALITY AND TOURISM SYSTEMS	ENGLISH	10	1	PUBLISHING INDIA GROUP	ISI	MODERATING EFFECT OF TECHNOLOGIES INTO BEHAVIOURAL INTENSIONS OF TOURISTS TOWARD USE OF MOBILE WALLETS FOR DIGITAL PAYMENTS TAM MODEL PERSPECTIVE	ARTICLE	16	2023	GUPTA SK;TIWARI SUNIL;HASSAN ARIF;GUPTA POONAM	INTL J HOSP TOUR SYST	none	H.N.B. GARHWAL UNIVERSITY;UNIVERSITY INSTITUTE OF TOURISM AND HOTEL MANAGEMENT (UITHM);GLA UNIVERSITY;H.N.B. GARHWAL UNIVERSITY	NOTREPORTED;H.N.B. GARHWAL UNIVERSITY;NOTREPORTED		GUPTA SK, 2023, INTL J HOSP TOUR SYST	GUPTA SK, 2023, INTL J HOSP TOUR SYST	INDIA	GUPTA SK, 2023,	wos
NAYOGA S;SAPUTRA M;FA'RIFAH R	ASPECT BASED SENTIMENT ANALYSIS; FINTECH; OVO; SUPPORT VECTOR MACHINE; TECHNOSTRESS	SUPPORT VECTOR MACHINES; ANALYSIS APPROACH; ASPECT BASED SENTIMENT ANALYSE; CUSTOMER REVIEW; FINANCIAL TECHNOLOGY; NEGATIVE SENTIMENTS; OVO; SENTIMENT ANALYSIS; SUPPORT VECTOR MACHINES ALGORITHMS; SUPPORT VECTORS MACHINE; TECHNOSTRESS; SENTIMENT ANALYSIS	SCHOOL OF INDUSTRIAL AND SYSTEM ENGINEERING, TELKOM UNIVERSITY, BANDUNG, INDONESIA	INT. CONF. ICT FOR SMART SOC., ICISS - PROCEEDING	THE RAPID GROWTH OF FINANCIAL TECHNOLOGY (FINTECH) SERVICES, PARTICULARLY E-WALLETS, HAS BROUGHT ABOUT NEW CHALLENGES AND STRESSORS FOR USERS. THIS STUDY AIMS TO ANALYZE TECHNOSTRESS IN THE CONTEXT OF FINTECH E-WALLETS ON OVO USING ASPECT-BASED SENTIMENT ANALYSIS AND THE SUPPORT VECTOR MACHINE (SVM) ALGORITHM. THE RESEARCH COLLECTED USER REVIEWS FROM GOOGLE PLAYSTORE AND APPLIED ASPECT-BASED SENT…		10.1109/ICISS59129.2023.10291581		10TH INTERNATIONAL CONFERENCE ON ICT FOR SMART SOCIETY, ICISS 2023 - PROCEEDING	ENGLISH	0		INSTITUTE OF ELECTRICAL AND ELECTRONICS ENGINEERS INC.	ISI	AN ANALYSIS OF FINTECH TECHNOSTRESS AND ITS IMPACT ON SMART ECONOMY A CUSTOMER REVIEWBASED SENTIMENT ANALYSIS APPROACH	CONFERENCE PAPER		2023	NAYOGA SATRIA ADHY;SAPUTRA MUHARDI;FA'RIFAH RISKA YANU	INT CONF ICT FOR SMART SOC, ICISS - PROCEEDING	none	TELKOM UNIVERSITY	TELKOM UNIVERSITY		NAYOGA SA, 2023, INT CONF ICT FOR SMART SOC, ICISS - PROCEEDING	NAYOGA SA, 2023, INT CONF ICT FOR SMART SOC, ICISS - PROCEEDING	INDONESIA	NAYOGA SA, 2023, INT CONF ICT FOR SMART SOC,	wos
BHATIA-KALLURI A	DIGITAL POLICIES; FINANCIAL EXCLUSION; INFORMATION POLICIES; LOW-COST PAYMENT ACCEPTANCE SOLUTION	ELECTRONIC MONEY; POINT OF SALE TERMINALS; DIGITAL POLICY; DIGITAL WALLETS; FINANCIAL EXCLUSION; FINANCIAL INCLUSIONS; INFORMATION POLICY; LOW-COST PAYMENT ACCEPTANCE SOLUTION; LOW-COSTS; PAPER ANALYSIS; PAYMENT POLICY; REAL-TIME TRANSACTIONS; COST EFFECTIVENESS	FACULTY OF INFORMATION, UNIVERSITY OF TORONTO, TORONTO, 08544, ON, CANADA	LECT. NOTES NETWORKS SYST.	THIS PAPER ANALYSES THE REGULATIONS FOR DIGITAL PAYMENT POLICIES THAT ARE ASSESSED AND AMENDED BASED ON ANY GAPS REGARDING ITS PENETRATION NATIONWIDE. THE DEMONETIZATION OF THE INDIAN BANKNOTES LED TO THE FACILITATION OF VARIOUS MODES OF DIGITAL PAYMENT. WHILE ADOPTING THESE MODES, THE CITIZENS FACED PERILS OF SURCHARGES, THE INCONVENIENCE OF NON-REAL-TIME TRANSACTIONS, AND STAGNATION OF CASH IN …	A. BHATIA-KALLURI; FACULTY OF INFORMATION, UNIVERSITY OF TORONTO, TORONTO, 08544, CANADA; EMAIL: ADITI.BHATIA@MAIL.UTORONTO.CA	10.1007/978-981-99-3243-6_54	23673370	LECTURE NOTES IN NETWORKS AND SYSTEMS	ENGLISH	0		SPRINGER SCIENCE AND BUSINESS MEDIA DEUTSCHLAND GMBH	ISI	FOSTERING ADOPTION OF DIGITAL PAYMENTS IN INDIA FOR FINANCIAL INCLUSION POLICIES AND ENVIRONMENT FOR IMPLEMENTATION	CONFERENCE PAPER	693 LNNS	2023	BHATIA-KALLURI ADITI	LECT NOTES NETWORKS SYST	none	UNIVERSITY OF TORONTO	NOTREPORTED;UNIVERSITY OF TORONTO;NOTREPORTED		BHATIA-KALLURI A, 2023, LECT NOTES NETWORKS SYST	BHATIA-KALLURI A, 2023, LECT NOTES NETWORKS SYST	CANADA	BHATIA-KALLURI A, 2023,	wos
AKTER M;BHUIYAN M;TABASSUM S;ASHRAFUL A S;MILON M;HOQUE M	CONTINUANCE INTENTION; E-WALLET; TECHNOLOGY ACCEPTANCE MODEL (TAM); THEORY OF PLANNED BEHAVIOR (TPB); UNDERGRADUATE UNIVERSITY STUDENTS		DEPARTMENT OF BUSINESS ADMINISTRATION, BANGLADESH UNIVERSITY, DHAKA, BANGLADESH; DEPARTMENT OF MANAGEMENT INFORMATION SYSTEMS, BEGUM ROKEYA UNIVERSITY, RANGPUR, BANGLADESH; DEPUTY COMMISSIONER, NATIONAL BOARD OF REVENUE, DHAKA, BANGLADESH; DEPARTMENT OF MANAGEMENT INFORMATION SYSTEMS, UNIVERSITY OF DHAKA, DHAKA, BANGLADESH	INT. J. ENG. TRENDS TECHNOL.	E-WALLETS ARE BECOMING INCREASINGLY POPULAR AS MORE PEOPLE USE DIGITAL PAYMENTS FOR EVERYDAY TRANSACTIONS. THE RESEARCH IS DETERMINED TO ASSESS THE RELATIONSHIP AMONG ESSENTIAL FACTORS FOR USAGE INTENTION TO USE E-WALLETS AMONG SOME SELECTED UNDERGRADUATE UNIVERSITY STUDENTS IN BANGLADESH. THE RESEARCHERS TOOK A MORE PRECISE APPROACH BY COMBINING THE TAM AND TPB MODELS TO CONDUCT THIS RESEARCH. P…	M.R.I. BHUIYAN; DEPARTMENT OF MANAGEMENT INFORMATION SYSTEMS, BEGUM ROKEYA UNIVERSITY, RANGPUR, BANGLADESH; EMAIL: RAKIB@MIS.BRUR.AC.BD	10.14445/22315381/IJETT-V71I6P228	23490918	INTERNATIONAL JOURNAL OF ENGINEERING TRENDS AND TECHNOLOGY	ENGLISH	5	6	SEVENTH SENSE RESEARCH GROUP	ISI	FACTORS AFFECTING CONTINUANCE INTENTION TO USE EWALLET AMONG UNIVERSITY STUDENTS IN BANGLADESH	ARTICLE	71	2023	AKTER MOST SADIA;BHUIYAN MOHAMMAD RAKIBUL ISLAM;TABASSUM SOMAYA;ASHRAFUL ALAM SM;MILON MD NOOR UDDIN;HOQUE MD RAKIBUL	INT J ENG TRENDS TECHNOL	none	BANGLADESH UNIVERSITY;BEGUM ROKEYA UNIVERSITY;UNIVERSITY OF DHAKA	NOTREPORTED;BEGUM ROKEYA UNIVERSITY;NOTREPORTED		AKTER MS, 2023, INT J ENG TRENDS TECHNOL	AKTER MS, 2023, INT J ENG TRENDS TECHNOL	BANGLADESH	AKTER MS, 2023,	wos
ENRIQUEZ B;PÉREZ C;BALLESTEROS M;NINAQUISPE J;MARÍA A;DE L Á G V M;MOGOLLÓN G F	DETERMINANTS FACTORS; DIGITAL TRANSFORMATION; MERCHANTS; MOBILE WALLET; UTUAT2		UNIVERSIDAD NACIONAL DE TRUJILLO, PERU; UNIVERSIDAD CESAR VALLEJO, PERU; UNIVERSIDAD PEDRO RUIZ GALLO, PERU; UNIVERSIDAD TECNOLÓGICA DEL PERÚ, PERU; UNIVERSIDAD DE SAN MARTÍN DE PORRES, PERU	PROC. LACCEI INT. MULTI-CONF. ENG. EDUC. TECHNOL.	THE STUDY MADE IT POSSIBLE TO EVALUATE THE DETERMINANTS FACTORS OF MOBILE WALLET ADOPTION AND RECOMMENDATION AMONG PERUVIAN MERCHANTS. METHODOLOGICALLY, THE STUDY WAS BASED ON A QUANTITATIVE APPROACH, WITH A NON-EXPERIMENTAL AND DESCRIPTIVE-EXPLORATORY DESIGN, USING A SURVEY AND A QUESTIONNAIRE AS TECHNIQUES. THE POPULATION CONSISTED OF MERCHANTS, USERS OF THE ELECTRONIC WALLET, TRUJILLO, 2023. T…		10.18687/LEIRD2023.1.1.280	24146390	PROCEEDINGS OF THE LACCEI INTERNATIONAL MULTI-CONFERENCE FOR ENGINEERING, EDUCATION AND TECHNOLOGY	SPANISH	0		LATIN AMERICAN AND CARIBBEAN CONSORTIUM OF ENGINEERING INSTITUTIONS	ISI	DETERMINANTS FACTORS OF MOBILE WALLET ADOPTION AND RECOMMENDATION AN EMPIRICAL ASSESSMENT IN MERCHANTS DETERMINANTS FACTORS OF MOBILE WALLET ADOPTION AND RECOMMENDATION AN EMPIRICAL ASSESSMENT IN MERCHANTS	CONFERENCE PAPER		2023	ENRIQUEZ BENICIO GONZALO ACOSTA;PÉREZ CÉSAR ROBIN VILCAPOMA;BALLESTEROS MARCO AGUSTÍN ARBULÚ;NINAQUISPE JOSE CARLOS MONTES;MARÍA ALBERTO LUIS PANTALEÓN SANTA;DE LOS ÁNGELES GUZMÁN VALLE MARÍA;MOGOLLÓN GARCÍA FRANCISCO SEGUNDO	PROC LACCEI INT MULTI-CONF ENG EDUC TECHNOL	none	UNIVERSIDAD NACIONAL DE TRUJILLO;UNIVERSIDAD CESAR VALLEJO;UNIVERSIDAD PEDRO RUIZ GALLO;UNIVERSIDAD TECNOLÓGICA DEL PERÚ;UNIVERSIDAD DE SAN MARTÍN DE PORRES	UNIVERSIDAD NACIONAL DE TRUJILLO;UNIVERSIDAD CESAR VALLEJO;UNIVERSIDAD PEDRO RUIZ GALLO;UNIVERSIDAD TECNOLÓGICA DEL PERÚ;UNIVERSIDAD DE SAN MARTÍN DE PORRES		ENRIQUEZ BGA, 2023, PROC LACCEI INT MULTI-CONF ENG EDUC TECHNOL	ENRIQUEZ BGA, 2023, PROC LACCEI INT MULTI-CONF ENG EDUC TECHNOL	PERU	ENRIQUEZ BGA, 2023,	wos
NUGROHO A;SIAGIAN H;OKTAVIO A;TARIGAN Z	CUSTOMER SATISFACTION; E-WALLET PAYMENT; E-WOM; EASE OF USE; PERCEIVED USEFULNESS		TOURISM DEPARTMENT, SCHOOL OF TOURISM, UNIVERSITAS CIPUTRA SURABAYA, INDONESIA; SCHOOL OF BUSINESS AND MANAGEMENT, PETRA CHRISTIAN UNIVERSITY, SURABAYA, INDONESIA	INT. J. DATA NETW. SCI.	CURRENTLY, STREAMING APPLICATIONS HAVE BEEN WIDELY USED BY USERS TO GET COMFORT AND PLEASURE IN LIFE. USERS COMMUNICATE WITH EACH OTHER ON SOCIAL MEDIA RELATED TO THE ACTIVITIES CARRIED OUT. COMMUNICATION IS FORMED ONLINE AS ELECTRONIC WORD OF MOUTH (E-WOM) BETWEEN ONE USER TO ANOTHER. THE DATA DISTRIBUTED WAS 1238 RESPONDENTS USING STREAMING APPLICATIONS AND 324 RESPONDENTS IN INDONESIA WHO HAD …	Z.J.H. TARIGAN; SCHOOL OF BUSINESS AND MANAGEMENT, PETRA CHRISTIAN UNIVERSITY, SURABAYA, INDONESIA; EMAIL: ZEPLIN@PETRA.AC.ID	10.5267/j.ijdns.2022.11.007	25618148	INTERNATIONAL JOURNAL OF DATA AND NETWORK SCIENCE	ENGLISH	5	1	GROWING SCIENCE	ISI	THE EFFECT OF EWOM ON CUSTOMER SATISFACTION THROUGH EASE OF USE PERCEIVED USEFULNESS AND EWALLET PAYMENT	ARTICLE	7	2023	NUGROHO AGUSTINUS;SIAGIAN HOTLAN;OKTAVIO ADRIE;TARIGAN ZEPLIN JIWA HUSADA	INT J DATA NETW SCI	none	UNIVERSITAS CIPUTRA SURABAYA;PETRA CHRISTIAN UNIVERSITY	NOTREPORTED;PETRA CHRISTIAN UNIVERSITY;NOTREPORTED		NUGROHO A, 2023, INT J DATA NETW SCI	NUGROHO A, 2023, INT J DATA NETW SCI	INDONESIA	NUGROHO A, 2023,	wos
NA N				LECT. NOTES INFORMATICS (LNI), PROC. - SERIES GES. INFORM. (GI)	THE PROCEEDINGS CONTAIN 14 PAPERS. THE TOPICS DISCUSSED INCLUDE: ESTABLISHING TRUST IN SSI VERIFIERS; LIFTING THE VEIL OF CREDENTIAL USAGE IN ORGANIZATIONS: A TAXONOMY; RESEARCH ON USER EXPERIENCE FOR DIGITAL IDENTITY WALLETS: STATE-OF-THE-ART AND RECOMMENDATIONS; X OUT OF N CREDENTIAL REQUESTS USING PRESENTATION EXCHANGE; PRIVATE AUTHENTICATION WITH ALPHA-BETA PRIVACY; A MORE USER-FRIENDLY DIGIT…			16175468	LECTURE NOTES IN INFORMATICS (LNI), PROCEEDINGS - SERIES OF THE GESELLSCHAFT FUR INFORMATIK (GI)	ENGLISH	0		GESELLSCHAFT FUR INFORMATIK (GI)	ISI	OPEN IDENTITY SUMMIT 2023 PROCEEDINGS	CONFERENCE REVIEW	P-335	2023		LECT NOTES INFORMATICS (LNI), PROC - SERIES GES INFORM (GI)	none		NOTREPORTED		NA NA, 2023, LECT NOTES INFORMATICS (LNI), PROC - SERIES GES INFORM (GI)	NA NA, 2023, LECT NOTES INFORMATICS (LNI), PROC - SERIES GES INFORM (GI)		NA NA, 2023, LECT NOTES INFORMATICS (LNI),	wos
PANDA S;SATHYA A;DAS S	BITCOIN; BUSINESS MODEL; CRYPTOCURRENCY; PEER-TO-PEER		DEPARTMENT OF DATA SCIENCE & ARTIFICIAL INTELLIGENCE, FACULTY OF SCIENCE & TECHNOLOGY (ICFAITECH), ICFAI FOUNDATION FOR HIGHER EDUCATION, TELANGANA, HYDERABAD, INDIA; DEPARTMENT OF COMPUTER SCIENCE AND ENGINEERING, FACULTY OF SCIENCE AND TECHNOLOGY (ICFAITECH), ICFAI FOUNDATION FOR HIGHER EDUCATION, TELANGANA, HYDERABAD, INDIA	INTELL. SYST. REF. LIBR.	THIS CASE DISCUSSES HOW THE EVOLUTION OF CRYPTOCURRENCY AND RELATED TECHNOLOGY CHANGING THE BUSINESS MODELS IN DIFFERENT SECTORS. IN SPITE OF RECEIVING BACKSLASH IN ITS EARLIER DAYS, IT IS OBSERVED THAT THE IMPACTS AND CONSEQUENCES OF CRYPTOCURRENCIES WERE HAVING A GROWING EFFECT ON MORE ON INDUSTRIES AND BUSINESS MODELS. AND, THERE HAS BEEN A HUGE FUNDING ON DIGITAL WALLETS AND PAYMENT SYSTEMS I…	S.K. PANDA; DEPARTMENT OF DATA SCIENCE & ARTIFICIAL INTELLIGENCE, FACULTY OF SCIENCE & TECHNOLOGY (ICFAITECH), ICFAI FOUNDATION FOR HIGHER EDUCATION, HYDERABAD, TELANGANA, INDIA; EMAIL: SANDEEPPANDA@IFHEINDIA.ORG	10.1007/978-3-031-22835-3_2	18684394	INTELLIGENT SYSTEMS REFERENCE LIBRARY	ENGLISH	14		SPRINGER SCIENCE AND BUSINESS MEDIA DEUTSCHLAND GMBH	ISI	BITCOIN BEGINNING OF THE CRYPTOCURRENCY ERA	BOOK CHAPTER	237	2023	PANDA SANDEEP KUMAR;SATHYA AR;DAS SUKANTA	INTELL SYST REF LIBR	none	DEPARTMENT OF DATA SCIENCE AND ARTIFICIAL INTELLIGENCE;DEPARTMENT OF COMPUTER SCIENCE AND ENGINEERING	NOTREPORTED;DEPARTMENT OF DATA SCIENCE AND ARTIFICIAL INTELLIGENCE;NOTREPORTED		PANDA SK, 2023, INTELL SYST REF LIBR	PANDA SK, 2023, INTELL SYST REF LIBR	INDIA	PANDA SK, 2023,	wos
AL-OKAILY M	DIGITAL FINANCIAL INCLUSION; E-LOYALTY; E-SATISFACTION; E-WALLETS; E-WOM; FINTECH		SCHOOL OF BUSINESS, JADARA UNIVERSITY, IRBID, JORDAN	INT. J. EMERG. MARK.	PURPOSE: THE PURPOSE OF THIS STUDY IS TO INVESTIGATE THE ANTECEDENT FACTORS INFLUENCING E-LOYALTY TOWARD E-WALLET PAYMENT APPS IN DEVELOPING COUNTRIES (E.G. JORDAN). THIS STUDY ALSO INVESTIGATES THE MEDIATING ROLE OF PERCEIVED USEFULNESS (PU) AND THE MODERATING ROLE OF ELECTRONIC WORD OF MOUTH (E-WOM) TOWARD THESE APPS. DESIGN/METHODOLOGY/APPROACH: AN ONLINE QUESTIONNAIRE WAS USED FOR DATA COLLEC…	M. AL-OKAILY; SCHOOL OF BUSINESS, JADARA UNIVERSITY, IRBID, JORDAN; EMAIL: M.ALOKAILY@JADARA.EDU.JO	10.1108/IJOEM-08-2022-1313	17468809	INTERNATIONAL JOURNAL OF EMERGING MARKETS	ENGLISH	21		EMERALD PUBLISHING	ISI	THE INFLUENCE OF ESATISFACTION ONUSERS ELOYALTY TOWARD EWALLET PAYMENT APPS A MEDIATEDMODERATED MODEL	ARTICLE		2023	AL-OKAILY MANAF	INT J EMERG MARK	none	JADARA UNIVERSITY	NOTREPORTED;JADARA UNIVERSITY;NOTREPORTED		AL-OKAILY M, 2023, INT J EMERG MARK	AL-OKAILY M, 2023, INT J EMERG MARK	JORDAN	AL-OKAILY M, 2023,	wos
SIHOMBING A;PUTRI S;PRABOWO H;SRIWIDADI T	ATTITUDE; CONFIRMATION; CONTINUANCE INTENTION; COVID-19 PANDEMIC; E-WALLET; INTENTION OF USE; PERCEIVED EASE OF USE; PERCEIVED USEFULNESS; SATISFACTION	ATTITUDE; CONFIRMATION; CONTINUANCE INTENTIONS; COVID-19 PANDEMIC; E-WALLET; INTENTION OF USE; PERCEIVED EASE-OF-USE; PERCEIVED USEFULNESS; SATISFACTION; SUSTAINABLE USE; COVID-19	BINUS ONLINE LEARNING, BINA NUSANTARA UNIVERSITY, MANAGEMENT DEPARTMENT, JAKARTA, 11480, INDONESIA	INT. CONF. BUS. IND. RES., ICBIR - PROC.	THE PURPOSE OF THE RESEARCH IS TO FIND OUT WHAT FACTORS COULD INFLUENCE THE INTENTION DURING THE COVID-19 PANDEMIC AT DKI JAKARTA, TO USE AN E-WALLET. USING THE ASSOCIATIVE APPROACH RESEARCH METHOD AND USING DATA COLLECTION TECHNIQUES WITH QUESTIONNAIRES TO 100 RESPONDENTS AND USING SEM DATA ANALYSIS TECHNIQUES SMART PLS. THE RESULTS ACHIEVED THAT THERE IS NO EFFECT BETWEEN CONFIRMATION ON SATISF…		10.1109/ICBIR57571.2023.10147653		2023 8TH INTERNATIONAL CONFERENCE ON BUSINESS AND INDUSTRIAL RESEARCH, ICBIR 2023 - PROCEEDINGS	ENGLISH	0		INSTITUTE OF ELECTRICAL AND ELECTRONICS ENGINEERS INC.	ISI	FACTORS AFFECTING THE INTENTION TO SUSTAINABLE USE OF EWALLET EMPIRICAL STUDY OF OUTBREAK COVID19	CONFERENCE PAPER		2023	SIHOMBING ARTHA DAME;PUTRI SHAUM JAVARIANI TEDDY;PRABOWO HARTIWI;SRIWIDADI TEGUH	INT CONF BUS IND RES, ICBIR - PROC	none	BINA NUSANTARA UNIVERSITY	BINA NUSANTARA UNIVERSITY		SIHOMBING AD, 2023, INT CONF BUS IND RES, ICBIR - PROC	SIHOMBING AD, 2023, INT CONF BUS IND RES, ICBIR - PROC	INDONESIA	SIHOMBING AD, 2023, INT CONF BUS IND RES,	wos
RUSDIANTI D;FAJAR A	BRAND AWARENESS; CUSTOMER SATISFACTION AND CUSTOMER LOYALTY; DIGITAL WALLET; PROMOTION; SECURITY; SERVICE QUALITY		INFORMATION SYSTEMS MANAGEMENT DEPARTMENT, BINUS GRADUATE PROGRAM, INFORMATION SYSTEMS MANAGEMENT, BINA NUSANTARA UNIVERSITY, JAKARTA, 11480, INDONESIA	J. SYST. MANAG. SCI.	THIS STUDY AIMS TO ANALYZE THE INFLUENCE OF BRAND AWARENESS (BA), PROMOTION (P), SECURITY(S), AND SERVICE QUALITY (SQ) ON CUSTOMER SATISFACTION (CS) AND ITS IMPACT ON CUSTOMER LOYALTY (CL) AMONG USERS OF THE OVO DIGITAL WALLET. USING A QUANTITATIVE RESEARCH APPROACH, THE STUDY DISTRIBUTED QUESTIONNAIRES VIA GOOGLE FORMS TO 125 RESPONDENTS WHO ARE OVO DIGITAL WALLET USERS IN JAKARTA. THE COLLECTED…	D. RUSDIANTI; INFORMATION SYSTEMS MANAGEMENT DEPARTMENT, BINUS GRADUATE PROGRAM, INFORMATION SYSTEMS MANAGEMENT, BINA NUSANTARA UNIVERSITY, JAKARTA, 11480, INDONESIA; EMAIL: DIAN.RUSDIANTI@BINUS.AC.ID	10.33168/JSMS.2023.0630	18166075	JOURNAL OF SYSTEM AND MANAGEMENT SCIENCES	ENGLISH	0	6	SUCCESS CULTURE PRESS	ISI	UNRAVELING THE IMPACT OF BRAND AWARENESS PROMOTION SECURITY AND SERVICE QUALITY ON CUSTOMER SATISFACTION AND LOYALTY IN EWALLET OVO AN ANALYTICAL STUDY	ARTICLE	13	2023	RUSDIANTI DIAN;FAJAR AHMAD NURUL	J SYST MANAG SCI	none	BINA NUSANTARA UNIVERSITY	NOTREPORTED;BINA NUSANTARA UNIVERSITY;NOTREPORTED		RUSDIANTI D, 2023, J SYST MANAG SCI	RUSDIANTI D, 2023, J SYST MANAG SCI	INDONESIA	RUSDIANTI D, 2023,	wos
ANDREEVA E	CENTRAL BANK DIGITAL CURRENCIES; DIGITAL PLATFORM; DIGITAL RUBLE; DIGITAL WALLET; FIAT CURRENCY; FINANCIAL LAW; FINANCIAL SYSTEM; MONETARY SYSTEM		ST. PETERSBURG STATE UNIVERSITY, 7–9, UNIVERSITETSKAYA NAB., ST. PETERSBURG, 199034, RUSSIAN FEDERATION	VESTNIK SANKT-PETERBURGSKOGO. UNIVERSITETA/	THIS PUBLICATION IS DEVOTED TO THE STUDY OF A NEW FINANCIAL AND LEGAL INSTRUMENT CENTRAL BANK DIGITAL CURRENCIES (CBDC) THAT IS HAD DISTRIBUTED WORLDWIDE. FIAT DIGITAL CURRENCIES ARE BEING ISSUED ALREADY IN SOME COUNTRIES, IN OTHERS THE ISSUE OF THEIR INTRODUCTION IS UNDER DISCUSSION ONLY. BASED ON THE METHOD OF COMPARATIVE LAW AND OTHER METHODS OF SCIENTIFIC RESURCH, THE AUTHOR OPENS OUT THE COM…	E.M. ANDREEVA; ST. PETERSBURG STATE UNIVERSITY, ST. PETERSBURG, 7–9, UNIVERSITETSKAYA NAB., 199034, RUSSIAN FEDERATION; EMAIL: ELENAANDREEVA09@MAIL.RU	10.21638/spbu14.2023.416	20741243	VESTNIK SANKT-PETERBURGSKOGO UNIVERSITETA. PRAVO	RUSSIAN	0	4	SAINT PETERSBURG STATE UNIVERSITY	ISI	CENTRAL BANK DIGITAL CURRENCIES FROM IDEA TO IMPLEMENTATION ФИАТНЫЕ ЦИФРОВЫЕ ВАЛЮТЫ ОТ ИДЕИ ДО РЕАЛИЗАЦИИ	ARTICLE	14	2023	ANDREEVA EM	VESTNIK SANKT-PETERBURGSKOGO UNIVERSITETA/	none	ST. PETERSBURG STATE UNIVERSITY	NOTREPORTED;ST. PETERSBURG STATE UNIVERSITY;NOTREPORTED		ANDREEVA EM, 2023, VESTNIK SANKT-PETERBURGSKOGO UNIVERSITETA/	ANDREEVA EM, 2023, VESTNIK SANKT-PETERBURGSKOGO UNIVERSITETA/		ANDREEVA EM, 2023,	wos
SURBAKTI L;AUWAL K M;WIBAWANINGSIH E	CONTINUOUS INTENTION; COVID 19; E-WALLET; PERCEIVED RISK; SOCIAL INFLUENCE	COMMERCE; ECONOMIC AND SOCIAL EFFECTS; MARKETING; CONTINUOUS INTENTION; E-WALLET; INDONESIA; PERCEIVED EASE-OF-USE; PERCEIVED RISK; PERCEIVED USEFULNESS; SOCIAL INFLUENCE; USAGE INTENTION; USE INTENTIONS; USERS PERSPECTIVE; COVID-19	UNIVERSITAS PEMBANGUNAN NASIONAL 'VETERAN' JAKARTA, INDONESIA, FACULTY OF ECONOMIC AND BUSINESS, DEPARTMENT OF ACCOUNTING, JAKARTA, INDONESIA; BAUCHI STATE UNIVERSITY GADAU, FACULTY OF MANAGEMENT SCIENCES, DEPARTMENT OF ACCOUNTING, NIGERIA	INT. CONF. INFORMATICS, MULTIMED., CYBER INF. SYST., ICIMCIS	THIS PAPER SEEKS TO UNDERSTAND E-WALLET USERS' MOTIVATION AND PERSPECTIVE ON THE CONTINUOUS USE OF THE PAYMENT MODE IN POST COVID 19 ERA. TECHNOLOGY ACCEPTANCE MODEL (TAM) FACTORS: PERCEIVED USEFULNESS (PU) AND PERCEIVED EASE OF USE (PEU) WERE USED AS THE BACKBONE OF THEORETICAL FRAMEWORK OF THE RESEARCH BECAUSE OF ITS ESTABLISHED STRONG EXPLANATORY POWER OBSERVED IN PREVIOUS RESEARCHES. OTHER FA…	L.P. SURBAKTI; UNIVERSITAS PEMBANGUNAN NASIONAL 'VETERAN' JAKARTA, INDONESIA, FACULTY OF ECONOMIC AND BUSINESS, DEPARTMENT OF ACCOUNTING, JAKARTA, INDONESIA; EMAIL: LIDYAPRIMTASURBAKTI@GMAIL.COM	10.1109/ICIMCIS60089.2023.10348998		2023 INTERNATIONAL CONFERENCE ON INFORMATICS, MULTIMEDIA, CYBER AND INFORMATION SYSTEMS, ICIMCIS 2023	ENGLISH	0		INSTITUTE OF ELECTRICAL AND ELECTRONICS ENGINEERS INC.	ISI	DETERMINANTS OF EWALLET CONTINUOUS USAGE INTENTION IN POSTCOVID 19 ERA	CONFERENCE PAPER		2023	SURBAKTI LIDYA PRIMTA;AUWAL KABIR MUHAMMAD;WIBAWANINGSIH EKAWATI JATI	INT CONF INFORMATICS, MULTIMED, CYBER INF SYST, ICIMCIS	none	UNIVERSITAS PEMBANGUNAN NASIONAL 'VETERAN' JAKARTA;BAUCHI STATE UNIVERSITY GADAU	NOTREPORTED;UNIVERSITAS PEMBANGUNAN NASIONAL 'VETERAN' JAKARTA;NOTREPORTED		SURBAKTI LP, 2023, INT CONF INFORMATICS, MULTIMED, CYBER INF SYST, ICIMCIS	SURBAKTI LP, 2023, INT CONF INFORMATICS, MULTIMED, CYBER INF SYST, ICIMCIS	NIGERIA	SURBAKTI LP, 2023, INT CONF INFORMATICS, MULTIMED, CYBER INF SYST,	wos
KURNIA N N;FAUZI R;SUAKANTO S	DESIGN THINKING; E-WALLET; ELECTRONIC MONEY; VISIPAY; VISUAL IMPAIRED	ELECTRONIC MONEY; WELL TESTING; DESIGN THINKING; DIGITAL METHODS; E-WALLET; FACE VERIFICATION; FINANCIAL INCLUSIONS; INDONESIA; VISIPAY; VISUAL IMPAIRED; VISUAL IMPAIRMENT; VISUALLY IMPAIRED; DESIGN	SCHOOL OF INDUSTRIAL AND SYSTEM ENGINEERING, TELKOM UNIVERSITY, INFORMATION SYSTEM DEPARTMENT, BANDUNG, INDONESIA	PROC. - INT. CONF. COMPUT. INFORMATICS ENG.: AI TRUST, RISK SECUR. MANAG. (AI TRISM), IC2IE	A BSTRACT-E-MONEY, OR E-WALLET PAYMENTS, HAVE GAINED SIGNIFICANT POPULARITY AS THE PREFERRED CHOICE AMONG FINTECH SERVICES IN INDONESIA. ELECTRONIC MONEY, OR AN E-WALLET, HAS CHANGED THE WAY WE TRANSACT IN THIS MODERN ERA. ONE OF THE MAIN ADVANTAGES OF PAYING ELECTRONIC MONEY OR E-WALLET IS THE CONVENIENCE AND COMFORT IT PROVIDES, NOW WE CAN MAKE PAYMENTS INSTANTLY AND SAFELY THROUGH DIGITAL METH…		10.1109/IC2IE60547.2023.10331566		PROCEEDINGS - 2023 6TH INTERNATIONAL CONFERENCE ON COMPUTER AND INFORMATICS ENGINEERING: AI TRUST, RISK AND SECURITY MANAGEMENT (AI TRISM), IC2IE 2023	ENGLISH	0		INSTITUTE OF ELECTRICAL AND ELECTRONICS ENGINEERS INC.	ISI	DESIGNING AN EWALLET SOLUTION FOR USERS WITH VISUAL IMPAIRMENT A DESIGN THINKING PERSPECTIVE	CONFERENCE PAPER		2023	KURNIA NINGRUM NETA AULYA;FAUZI RAHMAT;SUAKANTO SINUNG	PROC - INT CONF COMPUT INFORMATICS ENG: AI TRUST, RISK SECUR MANAG (AI TRISM), IC2IE	none	TELKOM UNIVERSITY	TELKOM UNIVERSITY		KURNIA NINGRUM NA, 2023, PROC - INT CONF COMPUT INFORMATICS ENG: AI TRUST, RISK SECUR MANAG (AI TRISM), IC2IE	KURNIA NINGRUM NA, 2023, PROC - INT CONF COMPUT INFORMATICS ENG: AI TRUST, RISK SECUR MANAG (AI TRISM), IC2IE	INDONESIA	KURNIA NINGRUM NA, 2023, PROC - INT CONF COMPUT INFORMATICS ENG: AI TRUST, RISK SECUR MANAG (AI TRISM),	wos
TANJUNG M;FEMIAWAN A;ONGGO G	CONTINUOUS USAGE; DIGITAL PAYMENT; DIGITAL WALLET; FINANCIAL TECHNOLOGY; TCT MODEL	ELECTRONIC MONEY; CONTINUED USE; CONTINUOUS USAGE; DIGITAL PAYMENT; DIGITAL WALLETS; FINANCIAL TECHNOLOGY; PARTIAL LEAST-SQUARES; STRUCTURED EQUATION MODELING; TECHNOLOGY CONTINUANCE THEORY MODEL; TECHNOLOGY CONTINUANCES; THEORY MODEL; LEAST SQUARES APPROXIMATIONS	BINA NUSANTARA UNIVERSITY, BBS MASTER PROGRAM, MANAGEMENT DEPARTMENT, JAKARTA, INDONESIA	INT. CONF. INFORMATICS, MULTIMED., CYBER INF. SYST., ICIMCIS	THE GOAL OF THIS STUDY IS TO EXPLORE IF CONSUMERS WOULD CONTINUE TO USE DIGITAL WALLETS AFTER THE COVID-19 CRISIS. THE TECHNOLOGY CONTINUANCE THEORY (TCT) IS USED AS THE FOUNDATION FOR THE RESEARCH. THE E-WALLET HAS BECOME POPULAR AND MILLIONS OF PEOPLE USE IT IN DAILY BASIS DURING THE PANDEMIC IN 2020-2021. HOWEVER, THE PANDEMIC HAS PASSED AND IS NOW UNDER CONTROL. TO TEST THE HYPOTHESIS, AROUND…	M. TANJUNG; BINA NUSANTARA UNIVERSITY, BBS MASTER PROGRAM, MANAGEMENT DEPARTMENT, JAKARTA, INDONESIA; EMAIL: MIRANDA.HOTMADIA@BINUS.AC.ID	10.1109/ICIMCIS60089.2023.10348970		2023 INTERNATIONAL CONFERENCE ON INFORMATICS, MULTIMEDIA, CYBER AND INFORMATION SYSTEMS, ICIMCIS 2023	ENGLISH	0		INSTITUTE OF ELECTRICAL AND ELECTRONICS ENGINEERS INC.	ISI	UNLEASHING DIGITAL WALLET EXPANSION IN THE POSTPANDEMIC A STUDY USING TECHNOLOGY CONTINUANCE THEORY	CONFERENCE PAPER		2023	TANJUNG MIRANDA;FEMIAWAN ANGGI;ONGGO GILBERT	INT CONF INFORMATICS, MULTIMED, CYBER INF SYST, ICIMCIS	none	BINA NUSANTARA UNIVERSITY	NOTREPORTED;BINA NUSANTARA UNIVERSITY;NOTREPORTED		TANJUNG M, 2023, INT CONF INFORMATICS, MULTIMED, CYBER INF SYST, ICIMCIS	TANJUNG M, 2023, INT CONF INFORMATICS, MULTIMED, CYBER INF SYST, ICIMCIS	INDONESIA	TANJUNG M, 2023, INT CONF INFORMATICS, MULTIMED, CYBER INF SYST,	wos
ZWILLING M;LESJAK D	CONSUMERS; CRYPTOCURRENCY; DIGITAL COIN; DIGITAL WALLET; FINTECH; LEGAL FRAMEWORK		ARIEL UNIVERSITY; UNIVERSITY OF PRIMORSKA, SLOVENIA	ISSUE. INF. SYST.	IT IS WIDELY RECOGNIZED THAT TECHNOLOGY, INFORMATION AND APPLICATIONS ARE OFTEN INTEGRATED INTO EVERYDAY LIFE, INCLUDING PURCHASING, SERVICES AND REMOTE LEARNING. EVEN TRADITIONALLY CONSERVATIVE INDUSTRIES SUCH AS BANKING ARE ADOPTING AND DEVELOPING DIGITAL APPLICATIONS FOR FINANCIAL TRANSACTIONS. HOWEVER, THE POPULARITY AND POTENTIAL OF FINANCIAL CURRENCIES WHICH ARE DEFINED AS DIGITAL CURRENCIE…		10.48009/3_iis_2023_106	15297314	ISSUES IN INFORMATION SYSTEMS	ENGLISH	0	3	INTERNATIONAL ASSOCIATION FOR COMPUTER INFORMATION SYSTEMS	ISI	THE FUTURE OF CRYPTO CURRENCY GAPS CHALLENGES AND CONCERNS	ARTICLE	24	2023	ZWILLING MOTI;LESJAK DUŠAN	ISSUE INF SYST	none	ARIEL UNIVERSITY;UNIVERSITY OF PRIMORSKA	ARIEL UNIVERSITY;UNIVERSITY OF PRIMORSKA		ZWILLING M, 2023, ISSUE INF SYST	ZWILLING M, 2023, ISSUE INF SYST	SLOVENIA	ZWILLING M, 2023,	wos
SUSANTO A;FATHULLOH A;NURYASIN N;FITRIYANI A	ENCRYPTION KEY; KEY MANAGEMENT SERVICE; SYSTEMATIC LITERATURE REVIEW	CRYPTOGRAPHY; EFFECTIVE APPROACHES; ENCRYPTION KEY; INVESTIGATE AND ANALYZE; KEY GENERATION CENTERS; KEY MANAGEMENT SERVICE; KEY MANAGEMENT SYSTEMS; KEY-MANAGEMENT; MANAGEMENT SERVICE; NETWORK GENERATION; SYSTEMATIC LITERATURE REVIEW; WIRELESS SENSOR NETWORKS	UIN SYARIF HIDAYATULLAH JAKARTA, DEPARTMENT OF INFORMATION SYSTEMS, SOUTH TANGERANG, INDONESIA; MITRA SOLUSI TELEMATIKA, DEPARTMENT OF DIGITAL AND ANALYTICS, JAKARTA, INDONESIA; BHAYANGKARA UNIVERSITY JAKARTA, DEPARTMENT OF INFORMATICS, JAKARTA, INDONESIA	INT. CONF. CYBER IT SERV. MANAG., CITSM	THIS PAPER UTILIZES THE SYSTEMATIC LITERATURE REVIEW (SLR) METHOD TO INVESTIGATE AND ANALYZE THE KEY MANAGEMENT SERVICES EMPLOYED FOR SECURING ENCRYPTION KEYS, AS WELL AS THE BENEFITS OF THESE METHODS. THE RESEARCH FINDINGS SUPPORT THE CONCLUSION THAT SLR IS AN EFFECTIVE APPROACH FOR STUDYING USER ACCEPTABILITY OF WIDELY EXPLORED E-WALLET APPS, WIRELESS SENSOR NETWORKS (WSNS), AND KEY GENERATION …	A. SUSANTO; UIN SYARIF HIDAYATULLAH JAKARTA, DEPARTMENT OF INFORMATION SYSTEMS, SOUTH TANGERANG, INDONESIA; EMAIL: ARIESSHT@UINJKT.AC.ID	10.1109/CITSM60085.2023.10455154		2023 11TH INTERNATIONAL CONFERENCE ON CYBER AND IT SERVICE MANAGEMENT, CITSM 2023	ENGLISH	0		INSTITUTE OF ELECTRICAL AND ELECTRONICS ENGINEERS INC.	ISI	SYSTEMATIC LITERATURE REVIEW KEY MANAGEMENT SERVICE FOR SECURING ENCRYPTION KEY	CONFERENCE PAPER		2023	SUSANTO ARIES;FATHULLOH AHNAF HADI;NURYASIN;FITRIYANI AIDA	INT CONF CYBER IT SERV MANAG, CITSM	none	BHAYANGKARA UNIVERSITY JAKARTA	NOTREPORTED;NOTREPORTED;NOTREPORTED		SUSANTO A, 2023, INT CONF CYBER IT SERV MANAG, CITSM	SUSANTO A, 2023, INT CONF CYBER IT SERV MANAG, CITSM	INDONESIA	SUSANTO A, 2023, INT CONF CYBER IT SERV MANAG,	wos
NA N				SPRINGER PROC. BUS. ECON.	THE PROCEEDINGS CONTAIN 62 PAPERS. THE SPECIAL FOCUS IN THIS CONFERENCE IS ON INDIAN ACADEMY OF MANAGEMENT. THE TOPICS INCLUDE: TELL THE TALE: A CONCEPTUAL ATTEMPT ON A DIGITAL MARKETING STRATEGY FOR START-UPS; TACTICAL AND FAST OR WISE AND SLOW? A CONCEPTUAL FRAMEWORK UNDERSTANDING IMPULSE BUYING BEHAVIOUR OF CUSTOMERS: MEDIATION–MODERATION MODEL; MODELLING CONSUMER’S MOBILE WALLET APP ADOPTION …			21987246	SPRINGER PROCEEDINGS IN BUSINESS AND ECONOMICS	ENGLISH	0		SPRINGER NATURE	ISI	8TH CONFERENCE OF INDIAN ACADEMY OF MANAGEMENT INDAM 2023	CONFERENCE REVIEW		2023		SPRINGER PROC BUS ECON	none		NOTREPORTED		NA NA, 2023, SPRINGER PROC BUS ECON	NA NA, 2023, SPRINGER PROC BUS ECON		NA NA, 2023,	wos
RISMAWAN B;CANDIWAN C	CONTINUANCE INTENTION; FLIP; INDONESIA; MODIFIED UTAUT2; TECHNOLOGY ACCEPTANCE	CONTINUANCE INTENTIONS; COST EFFECTIVE; DIGITAL WALLETS; FLIP; INDONESIA; MOBILE TRANSACTION; MODIFIED UTAUT2; MONEY TRANSFERS; TECHNOLOGY ACCEPTANCE; TECHNOLOGY APPLICATION; COST EFFECTIVENESS	TELKOM UNIVERSITY, FACULTY ECONOMIC AND BUSINESS, BANDUNG, INDONESIA	INT. CONF. DIGIT. BUS. TECHNOL. MANAG., ICONDBTM	COVID-19 PANDEMIC HAS CREATED A MOBILE TRANSACTION TREND AMONG THE INDONESIAN COMMUNITY. ONE OF THE WIDELY USED E-WALLET OR DIGITAL WALLET APPLICATIONS IN INDONESIA IS FLIP. FLIP IS A FINANCIAL TECHNOLOGY (FINTECH) APPLICATION FROM DEPOK, INDONESIA. FLIP EMPHASIZES "FREE INTERBANK TRANSFERS"AS ITS MAIN SELLING POINT. IN ADDITION, FLIP ALSO PROVIDES OTHER FEATURES SUCH AS FEE-FREE E-WALLET TOP-UPS…	B.K. RISMAWAN; TELKOM UNIVERSITY, FACULTY ECONOMIC AND BUSINESS, BANDUNG, INDONESIA; EMAIL: BERNARDKARNO@STUDENT.TELKOMUNIVERSITY.AC.ID	10.1109/ICONDBTM59210.2023.10326752		2023 INTERNATIONAL CONFERENCE ON DIGITAL BUSINESS AND TECHNOLOGY MANAGEMENT, ICONDBTM 2023	ENGLISH	0		INSTITUTE OF ELECTRICAL AND ELECTRONICS ENGINEERS INC.	ISI	ANALYSIS OF FLIP APPLICATION ADOPTION USING THE UTAUT2 MODEL IN THE POSTCOVID19 PANDEMIC IN INDONESIA	CONFERENCE PAPER		2023	RISMAWAN BERNARD KARNO;CANDIWAN	INT CONF DIGIT BUS TECHNOL MANAG, ICONDBTM	none	TELKOM UNIVERSITY	NOTREPORTED;TELKOM UNIVERSITY;EMAIL: BERNARDKARNO@STUDENT.TELKOMUNIVERSITY.AC.ID		RISMAWAN BK, 2023, INT CONF DIGIT BUS TECHNOL MANAG, ICONDBTM	RISMAWAN BK, 2023, INT CONF DIGIT BUS TECHNOL MANAG, ICONDBTM	INDONESIA	RISMAWAN BK, 2023, INT CONF DIGIT BUS TECHNOL MANAG,	wos
CHADWICK D;KUBACH M;SETTE I;JEYAKUMAR I	DECENTRALIZED IDENTITY; DIGITAL IDENTITY; DIGITAL WALLET; GAIN; IDENTITY MANAGEMENT; OIDC FEDERATION; SELF-SOVEREIGN IDENTITY; TRAIN; TRUST LISTS; TRUST REGISTRY; TRUSTED ISSUERS	DECENTRALISED; DECENTRALIZED IDENTITY; DIGITAL IDENTITY; DIGITAL WALLETS; GAIN; IDENTITY MANAGEMENT; OIDC FEDERATION; SELF-SOVEREIGN IDENTITY; TRAIN; TRUST LIST; TRUST REGISTRY; TRUSTED ISSUER; ELECTRONIC DOCUMENT IDENTIFICATION SYSTEMS	TRUETRUST LTD., CHARTHAM, CT4 7TG, UNITED KINGDOM; FRAUNHOFER IAO, NOBELSTR. 12, STUTTGART, 70569, GERMANY; CESAR, RUA BIONE, PE, RECIFE, 220, BRAZIL; UNIVERSITY OF STUTTGART, INSTITUTE OF HUMAN FACTORS AND TECHNOLOGY MANAGEMENT IAT, ALLMANDRING 35, STUTTGART, 70569, GERMANY	LECT. NOTES INFORMATICS (LNI), PROC. - SERIES GES. INFORM. (GI)	WE PRESENT A CONCEPTUAL MODEL THAT ENABLES A USER/HOLDER WITH A WALLET HOLDING W3C VERIFIABLE CREDENTIALS (VCS) TO DETERMINE IF THE VERIFIER IS TRUSTED TO CONFORM TO GDPR SO THAT IT MIGHT BE GIVEN THE USER’S PERSONAL IDENTIFYING INFORMATION CONTAINED IN THEIR VCS. WE DESCRIBE THE IMPLEMENTATION OF THIS MODEL USING THE TRAIN TRUST INFRASTRUCTURE AND HOW WALLETS MIGHT INTEROPERATE WITH VERIFIERS US…		10.18420/OID2023_01	16175468	LECTURE NOTES IN INFORMATICS (LNI), PROCEEDINGS - SERIES OF THE GESELLSCHAFT FUR INFORMATIK (GI)	ENGLISH	0		GESELLSCHAFT FUR INFORMATIK (GI)	ISI	ESTABLISHING TRUST IN SSI VERIFIERS	CONFERENCE PAPER	P-335	2023	CHADWICK DAVID W;KUBACH MICHAEL;SETTE IORAM;JEYAKUMAR ISAAC HENDERSON JOHNSON	LECT NOTES INFORMATICS (LNI), PROC - SERIES GES INFORM (GI)	none	UNIVERSITY OF STUTTGART	NOTREPORTED;NOTREPORTED;NOTREPORTED;UNIVERSITY OF STUTTGART		CHADWICK DW, 2023, LECT NOTES INFORMATICS (LNI), PROC - SERIES GES INFORM (GI)	CHADWICK DW, 2023, LECT NOTES INFORMATICS (LNI), PROC - SERIES GES INFORM (GI)	GERMANY	CHADWICK DW, 2023, LECT NOTES INFORMATICS (LNI),	wos
VUONG B	E-WALLETS; EFFORT EXPECTANCY; ELECTRONIC WALLETS; FACILITATING CONDITIONS; PERCEIVED CREDIBILITY; PERFORMANCE EXPECTANCY; SOCIAL INFLUENCE; VIETNAM		FACULTY OF BUSINESS ADMINISTRATION, VIETNAM AVIATION ACADEMY, 104 NGUYEN VAN TROI, WARD 8, PHU NHUAN DISTRICT, HO CHI MINH CITY, 700000, VIET NAM	INT. J. ELECTRON. MARK. RETAIL.	DURING THE CURRENT PANDEMIC, HUMANITY IS FACING MANY DIFFICULTIES. PEOPLE HAVE TO KEEP A CERTAIN DISTANCE TO BE ABLE TO KEEP THEMSELVES SAFE. AS A CONSEQUENCE, E-COMMERCE APPEARS AND HELPS HUMANS TO BUY/SELL WITHOUT HAVING TO MEET EACH OTHER DIRECTLY. ALONG WITH THE GROWTH OF E-COMMERCE, ELECTRONIC PAYMENT HAS BECOME EXPLOSIVE, AND AS IF IT WAS CREATED TO SOLVE THIS, E-WALLET HAS COME TO PROMINEN…	B.N. VUONG; FACULTY OF BUSINESS ADMINISTRATION, VIETNAM AVIATION ACADEMY, HO CHI MINH CITY, 104 NGUYEN VAN TROI, WARD 8, PHU NHUAN DISTRICT, 700000, VIET NAM; EMAIL: NHATVUONGA1@GMAIL.COM	10.1504/IJEMR.2023.133946	17411025	INTERNATIONAL JOURNAL OF ELECTRONIC MARKETING AND RETAILING	ENGLISH	0	4	INDERSCIENCE PUBLISHERS	ISI	A MODEL OF FACTORS INFLUENCING CUSTOMERS INTENTION TO USE EWALLETS DURING COVID19 IN VIETNAM	ARTICLE	14	2023	VUONG BUI NHAT	INT J ELECTRON MARK RETAIL	none	VIETNAM AVIATION ACADEMY	NOTREPORTED;VIETNAM AVIATION ACADEMY;NOTREPORTED		VUONG BN, 2023, INT J ELECTRON MARK RETAIL	VUONG BN, 2023, INT J ELECTRON MARK RETAIL		VUONG BN, 2023,	wos
SITUMORANG S			FACULTY OF ECONOMICS AND BUSINESS, UNIVERSITAS SUMATERA UTARA, MEDAN, INDONESIA	DIGITAL TRANSFORMATION FOR BUS. AND SOCIETY: CONTEMPORARY ISSUES AND APPLICATIONS IN ASIA	THE COVID-19 PANDEMIC HAS SIGNIFICANTLY IMPACTED THE USE OF DIGITAL WALLETS IN INDONESIA. THE TREND OF CONTACTLESS CASHLESS PAYMENTS THAT OFFER VARIOUS CONVENIENCES, EFFICIENCIES, PROMOTIONS AND DISCOUNTS IN SHOPPING HAS INCREASED THE ADOPTION OF MOBILE PAYMENT TECHNOLOGY. THE VIABILITY OF A MOBILE PAYMENT COMPANY IS HIGHLY DEPENDENT ON CONTINUANCE INTENTION’S RELATIONSHIP WITH USERS. HOWEVER, CO…		10.4324/9781003441298-10		DIGITAL TRANSFORMATION FOR BUSINESS AND SOCIETY: CONTEMPORARY ISSUES AND APPLICATIONS IN ASIA	ENGLISH	0		TAYLOR AND FRANCIS	ISI	MOBILE PAYMENT TRENDS IN THE DIGITAL SHOPPING BEHAVIOUR OF THE MILLENNIAL GENERATION	BOOK CHAPTER		2023	SITUMORANG SYAFRIZAL HELMI	DIGITAL TRANSFORMATION FOR BUS AND SOCIETY: CONTEMPORARY ISSUES AND APPLICATIONS IN ASIA	none	UNIVERSITAS SUMATERA UTARA	UNIVERSITAS SUMATERA UTARA		SITUMORANG SH, 2023, DIGITAL TRANSFORMATION FOR BUS AND SOCIETY: CONTEMPORARY ISSUES AND APPLICATIONS IN ASIA	SITUMORANG SH, 2023, DIGITAL TRANSFORMATION FOR BUS AND SOCIETY: CONTEMPORARY ISSUES AND APPLICATIONS IN ASIA	INDONESIA	SITUMORANG SH, 2023,	wos
TIAN Y;CHAN T;SUKI N;KASIM M			FACULTY OF MODERN LANGUAGES AND COMMUNICATION, UNIVERSITI PUTRA MALAYSIA, SERDANG, SELANGOR, 43400, MALAYSIA; FACULTY OF APPLIED COMMUNICATION, MULTIMEDIA UNIVERSITY, CYBERJAYA, SELANGOR, 63100, MALAYSIA; OTHMAN YEOP ABDULLAH GRADUATE SCHOOL OF BUSINESS (OYAGSB), UNIVERSITI UTARA MALAYSIA, KEDAH, MALAYSIA; INSTITUTE OF SUSTAINABLE GROWTH AND URBAN DEVELOPMENT (ISGUD), UNIVERSITI UTARA MALAYSIA, K…	HUM. BEHAV. EMERG. TECHNOL.	THE ADVANCEMENT OF E-WALLET SYSTEMS, INCLUDING ALIPAY, HAS LED CONSUMERS TO EMBRACE DIGITAL PAYMENT WITH FINANCIAL TECHNOLOGIES. YET, LIMITED RESEARCH FOCUSED ON THE USAGE OF E-WALLETS IN THE CONTEXT OF EMERGING ECONOMIES. THIS RESEARCH IS AIMED AT INVESTIGATING THE PREDICTORS OF CONSUMERS' USE BEHAVIOR OF THE ALIPAY E-WALLET SYSTEM IN AN EMERGING MARKET AND MODERATING ROLE OF PERCEIVED TRUST AND…	T.J. CHAN; FACULTY OF APPLIED COMMUNICATION, MULTIMEDIA UNIVERSITY, SELANGOR, CYBERJAYA, 63100, MALAYSIA; EMAIL: TJCHAN@MMU.EDU.MY	10.1155/2023/5276406	25781863	HUMAN BEHAVIOR AND EMERGING TECHNOLOGIES	ENGLISH	18		WILEY-HINDAWI	ISI	MODERATING ROLE OF PERCEIVED TRUST AND PERCEIVED SERVICE QUALITY ON CONSUMERS USE BEHAVIOR OF ALIPAY EWALLET SYSTEM THE PERSPECTIVES OF TECHNOLOGY ACCEPTANCE MODEL AND THEORY OF PLANNED BEHAVIOR	ARTICLE	2023	2023	TIAN YANG;CHAN TAK JIE;SUKI NORAZAH MOHD;KASIM MOHD ARIFF	HUM BEHAV EMERG TECHNOL	none	UNIVERSITI PUTRA MALAYSIA;MULTIMEDIA UNIVERSITY;UNIVERSITI UTARA MALAYSIA;UNIVERSITI UTARA MALAYSIA;AJMAN UNIVERSITY	NOTREPORTED;MULTIMEDIA UNIVERSITY;NOTREPORTED		TIAN Y, 2023, HUM BEHAV EMERG TECHNOL	TIAN Y, 2023, HUM BEHAV EMERG TECHNOL	UNITED ARAB EMIRATES	TIAN Y, 2023,	wos
SCHWALM S	ARCHITECTURE REFERENCE FRAMEWORK; EIDAS 2.0; EU DIGITAL WALLET	ARCHITECTURE REFERENCE FRAMEWORK; DECENTRALISED; DIGITAL IDENTITY; DIGITAL WALLETS; EIDAS 2.0; EU DIGITAL WALLET; REFERENCE FRAMEWORKS; TRUST MODELS; TRUST SERVICE; ELECTRONIC DOCUMENT IDENTIFICATION SYSTEMS	MSG GROUP, ROBERT-BÜRKLE-STR. 1, ISMANING, 85737, GERMANY	LECT. NOTES INFORMATICS (LNI), PROC. - SERIES GES. INFORM. (GI)	EIDAS 2.0 INTRODUCES THE EU DIGITAL WALLET AS THE EID MEAN INCLUDING NOT ONLY THE PID (EID SCHEME) BUT ALSO ADDITIONAL ATTRIBUTES LIKE (QUALIFIED) ATTESTATION OF ATTRIBUTES AND GIVES THE CONTROL OVER ITS IDENTITY BACK TO THE USER IN REGULATED APPROACH. THIS MEANS THAT EIDAS 2.0 GIVES THE POSSIBILITY TO PROVIDE LEGAL TRUST ON DECENTRALIZED DIGITAL IDENTITIES IN SELF-SOVEREIGN MANNER BY COMBINING E…		10.18420/OID2023_09	16175468	LECTURE NOTES IN INFORMATICS (LNI), PROCEEDINGS - SERIES OF THE GESELLSCHAFT FUR INFORMATIK (GI)	ENGLISH	2		GESELLSCHAFT FUR INFORMATIK (GI)	ISI	THE POSSIBLE IMPACTS OF THE EIDAS 20 DIGITAL IDENTITY APPROACH IN GERMANY AND EUROPE	CONFERENCE PAPER	P-335	2023	SCHWALM STEFFEN	LECT NOTES INFORMATICS (LNI), PROC - SERIES GES INFORM (GI)	none		NOTREPORTED		SCHWALM S, 2023, LECT NOTES INFORMATICS (LNI), PROC - SERIES GES INFORM (GI)	SCHWALM S, 2023, LECT NOTES INFORMATICS (LNI), PROC - SERIES GES INFORM (GI)	GERMANY	SCHWALM S, 2023, LECT NOTES INFORMATICS (LNI),	wos
KATINI K;AMALANATHAN S;HRIIZHIINIO K	DIGITAL TECHNOLOGY; ENVIRONMENTAL SUSTAINABILITY; MOBILE WALLETS USAGE; NORTHEAST INDIAN TRIBAL; PLS-SEM	ENVIRONMENTAL PROTECTION; ENVIRONMENTAL TECHNOLOGY; LEAST SQUARES APPROXIMATIONS; DIGITAL TECHNOLOGIES; ENVIRONMENTAL SUSTAINABILITY; MOBILE WALLET USAGE; NORTHEAST INDIAN TRIBAL; PARTIAL LEAST-SQUARES; PERCEIVED SECURITIES; PERFORMANCE; PLS-SEM; PRICE VALUES; RESEARCH MODELS; SUSTAINABLE DEVELOPMENT	CHRIST (DEEMED TO BE UNIVERSITY), BANGALORE, 560029, INDIA; SCHOOL OF BUSINESS AND MANAGEMENT, CHRIST (DEEMED TO BE UNIVERSITY), BANGALORE, 560029, INDIA; UNIVERSITY OF HYDERABAD, TELANGANA, 500046, INDIA	UNIVERS. ACCESS INF. SOC.	THIS RESEARCH EMPIRICALLY EXAMINES THE ANTECEDENT FACTORS INFLUENCING THE RELATIONSHIP BETWEEN MOBILE WALLET USE AND ENVIRONMENTAL SUSTAINABILITY. THE STUDY ADOPTED THE UTAUT2 MODEL WITH CONSTRUCTS OF EFFORT EXPECTANCY, PERFORMANCE EXPECTANCY, PRICE VALUE, MOBILE WALLET USAGE, PERCEIVED SECURITY, AND ENVIRONMENTAL SUSTAINABILITY. THE RESEARCH MODEL WAS TESTED USING A QUESTIONNAIRE-BASED RESPONSE …	K. KATINI; CHRIST (DEEMED TO BE UNIVERSITY), BANGALORE, 560029, INDIA; EMAIL: KATINILOHUNA@GMAIL.COM	10.1007/s10209-023-01027-5	16155289	UNIVERSAL ACCESS IN THE INFORMATION SOCIETY	ENGLISH	0		SPRINGER SCIENCE AND BUSINESS MEDIA DEUTSCHLAND GMBH	ISI	CAN MOBILE WALLET USAGE CONTRIBUTE TOWARDS ENVIRONMENTAL SUSTAINABILITY EVIDENCE FROM A MODERATED MEDIATION APPROACH	ARTICLE		2023	KATINI K;AMALANATHAN S;HRIIZHIINIO KAIKHO	UNIVERS ACCESS INF SOC	none	CHRIST (DEEMED TO BE UNIVERSITY);CHRIST (DEEMED TO BE UNIVERSITY);UNIVERSITY OF HYDERABAD	NOTREPORTED;CHRIST (DEEMED TO BE UNIVERSITY);NOTREPORTED		KATINI K, 2023, UNIVERS ACCESS INF SOC	KATINI K, 2023, UNIVERS ACCESS INF SOC	INDIA	KATINI K, 2023,	wos
MENG Z;HAYAT N;AL M A	E-WALLET; FINANCIAL SERVICE; INTENTION; MALAYSIA; USAGE; UTAUT; YOUTH		UCSI GRADUATE BUSINESS SCHOOL, UCSI UNIVERSITY, MALAYSIA, UCSI HEIGHTS (TAMAN CONNAUGHT), KUALA LUMPUR, CHERAS, MALAYSIA; GLOBAL ENTREPRENEURSHIP RESEARCH AND INNOVATION CENTRE, UNIVERSITI MALAYSIA KELANTAN, PENGKALAN CHEPA, KELANTAN, KOTA BHARU, MALAYSIA; UKM – GRADUATE SCHOOL OF BUSINESS, UNIVERSITI KEBANGSAAN MALAYSIA, SELANGOR DARUL EHSAN, UKM BANGI, MALAYSIA	CONTRIB. MANAG. SCI.	TECHNOLOGIES ARE INCREASINGLY BECOMING VITAL TO HUMAN LIFE, AND PANDEMICS LIKE COVID-19 FURTHER ENHANCE THE POSSIBILITY OF TECHNOLOGY ADOPTION TO FACILITATE HUMAN LIFE. HOWEVER, TECHNOLOGY ADOPTION ALWAYS REMAINS SLOW AND TRICKY FOR THE MASSES. THE CURRENT STUDY EXPLORES AND EXPOSES THE FORMATION OF INTENTION AND LATER ACCEPTANCE OF ELECTRONIC WALLETS (E-WALLET) AMONG MALAYSIAN YOUTH. THE PRESENT…	A. AL MAMUN; UKM – GRADUATE SCHOOL OF BUSINESS, UNIVERSITI KEBANGSAAN MALAYSIA, UKM BANGI, SELANGOR DARUL EHSAN, MALAYSIA; EMAIL: ALMAMUN@UKM.EDU.MY	10.1007/978-3-031-27296-7_23	14311941	CONTRIBUTIONS TO MANAGEMENT SCIENCE	ENGLISH	0		SPRINGER SCIENCE AND BUSINESS MEDIA DEUTSCHLAND GMBH	ISI	EXPLORING THE INTENTION AND USE OF EWALLET AMONG THE YOUNG MALAYSIAN UNIFIED THEORY OF ACCEPTANCE AND USE OF TECHNOLOGY	BOOK CHAPTER	PART F1060	2023	MENG ZHAO;HAYAT NAEEM;AL MAMUN ABDULLAH	CONTRIB MANAG SCI	none	UCSI UNIVERSITY;UNIVERSITI MALAYSIA KELANTAN;UNIVERSITI KEBANGSAAN MALAYSIA	NOTREPORTED;UNIVERSITI KEBANGSAAN MALAYSIA;NOTREPORTED		MENG Z, 2023, CONTRIB MANAG SCI	MENG Z, 2023, CONTRIB MANAG SCI	MALAYSIA	MENG Z, 2023,	wos
KAPOOR A;SINDWANI R;GOEL M	BEST WORST METHOD; BWM; KEY ACCEPTANCE FACTORS; MCDM; MOBILE WALLET; MULTI-CRITERIA DECISION-MAKING; PRIORITISATION		J.C. BOSE UNIVERSITY OF SCIENCE AND TECHNOLOGY, YMCA, FARIDABAD, INDIA	INT. J. PROCESS MANAGE. BENCHMARKING	THE AIM OF THE PRESENT RESEARCH IS TO PROPOSE A NOVEL MULTI-CRITERIA APPROACH FOR ASSESSMENT OF MOBILE WALLET (M-WALLET) KEY ACCEPTANCE FACTORS. SIX CRITICAL ACCEPTANCE FACTORS ARE IDENTIFIED THROUGH EXTENSIVE LITERATURE REVIEW AND DISCUSSION WITH AN EXPERT. A NEW IMPORTANT FACTOR INFLUENCING ACCEPTANCE OF M-WALLET CALLED ‘POLICY AND REGULATORY MEASURES’ HAS BEEN PROPOSED BY AUTHORS. THIS HAS RES…	A. KAPOOR; J.C. BOSE UNIVERSITY OF SCIENCE AND TECHNOLOGY, YMCA, FARIDABAD, INDIA; EMAIL: ASHWARYAKAPOOR@YAHOO.COM	10.1504/IJPMB.2023.129822	14606739	INTERNATIONAL JOURNAL OF PROCESS MANAGEMENT AND BENCHMARKING	ENGLISH	3	4	INDERSCIENCE PUBLISHERS	ISI	EVALUATING MOBILE WALLET ACCEPTANCE FACTORS USING BEST WORST METHOD	ARTICLE	13	2023	KAPOOR ASHWARYA;SINDWANI RAJIV;GOEL MANISHA	INT J PROCESS MANAGE BENCHMARKING	none	J.C. BOSE UNIVERSITY OF SCIENCE AND TECHNOLOGY	NOTREPORTED;J.C. BOSE UNIVERSITY OF SCIENCE AND TECHNOLOGY;NOTREPORTED		KAPOOR A, 2023, INT J PROCESS MANAGE BENCHMARKING	KAPOOR A, 2023, INT J PROCESS MANAGE BENCHMARKING	INDIA	KAPOOR A, 2023,	wos
TABECK P;AHUJA V	ACCEPTANCE; INNOVATION; PANDEMIC; RETAILERS; TECHNOLOGICAL INNOVATION; TECHNOLOGY	ELECTRONIC COMMERCE; ENGINEERING RESEARCH; ACCEPTANCE; ACCEPTANCE OF TECHNOLOGIES; ECONOMIC GROWTHS; INNOVATION; PANDEMIC; RETAIL BUSINESS; RETAILER; TECHNOLOGICAL INNOVATION; TECHNOLOGY; UNCERTAINTY; SALES	SYMBIOSIS INSTITUTE OF BUSINESS MANAGEMENT NOIDA, SYMBIOSIS INTERNATIONAL (DEEMED) UNIVERSITY, INDIA	PROC. INT. CONF. ELECTRON. BUS. (ICEB)	CONSUMERS AROUND THE WORLD HAVE RADICALLY CHANGED THEIR LIFESTYLES AND BEHAVIOUR’S IN RESPONSE TO THE PANDEMIC. A SLOWDOWN IN ECONOMIC GROWTH AND THE FEAR OF UNCERTAINTY AFFECTED THEIR BUYING HABITS AND LIMITED THEIR SHOPPING SPREE. WHILE CONSUMERS RESTRAINED THEMSELVES BEHIND THE DOORS, DUE TO FINANCIAL UNCERTAINTY, THE RETAIL BUSINESS FELT THE HEAT WITH A QUESTION ON THE SURVIVAL OF INDUSTRY. I…	P.S. TABECK; SYMBIOSIS INSTITUTE OF BUSINESS MANAGEMENT NOIDA, SYMBIOSIS INTERNATIONAL (DEEMED) UNIVERSITY, INDIA; EMAIL: POOJA.TABECK@SIBMNOIDA.SIU.EDU.IN		16830040	PROCEEDINGS OF THE INTERNATIONAL CONFERENCE ON ELECTRONIC BUSINESS (ICEB)	ENGLISH	0		INTERNATIONAL CONSORTIUM FOR ELECTRONIC BUSINESS	ISI	LEVERAGING TECHNOLOGICAL INNOVATION AND RETAIL BUSINESSES DURING PANDEMIC TIMES	CONFERENCE PAPER	23	2023	TABECK POOJA SEHGAL;AHUJA VANDANA	PROC INT CONF ELECTRON BUS (ICEB)	none	SYMBIOSIS INTERNATIONAL (DEEMED) UNIVERSITY	NOTREPORTED;SYMBIOSIS INTERNATIONAL (DEEMED) UNIVERSITY;NOTREPORTED		TABECK PS, 2023, PROC INT CONF ELECTRON BUS (ICEB)	TABECK PS, 2023, PROC INT CONF ELECTRON BUS (ICEB)	INDIA	TABECK PS, 2023,	wos
VISHNU G;KUMAR D;SINGH K	BLOCKCHAIN TECHNOLOGY; BLOCKCHAIN-BASED WARRANTY SYSTEM; DECENTRALIZED; DIGITAL NFTS; DLT; ECOMMERCE; P2P; PUBLIC LEDGER; SOLIDITY; TRANSACTION; WARRANTY	AUTHENTICATION; AUTHORIZATION; CRIME; DISTRIBUTED LEDGER; ELECTRONIC COMMERCE; SALES; BLOCK-CHAIN; BLOCKCHAIN TECHNOLOGY; BLOCKCHAIN-BASED WARRANTY SYSTEM; DECENTRALISED; DIGITAL NON-FISCAL TOKEN; DLT; ECOMMERCE; P2P; PUBLIC LEDG; SOLIDITY; TRANSACTION; WARRANTY; BLOCKCHAIN	GALGOTIAS UNIVERSITY, COMPUTER SCIENCE AND ENGINEERING, UTTAR PRADESH, GREATER NOIDA, INDIA; GALGOTIAS UNIVERSITY, DEPARTMENT OF COMPUTER SCIENCE AND ENGINEERING, UTTAR PRADESH, GREATER NOIDA, INDIA	PROC. INT. CONF. CONTEMP. COMPUT. INFORMATICS, IC3I	BLOCKCHAIN-BASED E-COMMERCE NFT WARRANTY SYSTEM IS A NEW SOLUTION THAT ALLOWS CUSTOMERS TO RECEIVE DIGITAL WARRANTY FOR THEIR PURCHASES ON E-COMMERCE PLATFORMS. THE SYSTEM IS BUILT USING THE ETHEREUM BLOCKCHAIN AND USES NON-FISCAL TOKENS (NFTS) TO SET UP AND EXECUTE TRANSACTIONS. THIS PROJECT AIMS TO SOLVE THE PHYSICAL CERTIFICATE MANAGEMENT PROBLEM AND THE CHALLENGE OF WARRANTY TRACKING FOR CUST…		10.1109/IC3I59117.2023.10397739		PROCEEDINGS OF INTERNATIONAL CONFERENCE ON CONTEMPORARY COMPUTING AND INFORMATICS, IC3I 2023	ENGLISH	0		INSTITUTE OF ELECTRICAL AND ELECTRONICS ENGINEERS INC.	ISI	BLOCKCHAINBASED ECOMMERCE WARRANTY SYSTEM USING NFTS	CONFERENCE PAPER		2023	VISHNU G;KUMAR DEEPAK;SINGH KIRAN	PROC INT CONF CONTEMP COMPUT INFORMATICS, IC3I	none	GALGOTIAS UNIVERSITY;GALGOTIAS UNIVERSITY	GALGOTIAS UNIVERSITY;GALGOTIAS UNIVERSITY		VISHNU G, 2023, PROC INT CONF CONTEMP COMPUT INFORMATICS, IC3I	VISHNU G, 2023, PROC INT CONF CONTEMP COMPUT INFORMATICS, IC3I	INDIA	VISHNU G, 2023, PROC INT CONF CONTEMP COMPUT INFORMATICS,	wos
KRAIWANIT T;LIMNA P;WATTANASIN P;MOOLNGEARN P;SATRANARAKUN A	ADOPTION; DIGITAL WALLET; FINANCIAL TECHNOLOGY; WORLDCOIN		RANGSIT UNIVERSITY, THAILAND	ADV. BUS. REL. SCI. RES. J.	THIS STUDY INVESTIGATES THE ADOPTION OF DIGITAL WALLET TECHNOLOGY, PARTICULARLY WORLDCOIN, IN THAILAND'S FINTECH SECTOR. QUALITATIVE RESEARCH INVOLVING INTERVIEWS WAS CONDUCTED WITH 10 DIGITAL WALLET EXPERTS, REVEALING SIGNIFICANT ADOPTION FACTORS LIKE CONVENIENCE, SECURITY, AND TRUST. DIGITAL WALLETS PROVIDE BENEFITS SUCH AS SIMPLIFIED PAYMENT PROCESSES, REDUCED COMPLEXITY, INCREASED ACCESSIBILI…			1855931X	ADVANCES IN BUSINESS RELATED SCIENTIFIC RESEARCH JOURNAL	ENGLISH	0	2	GEA COLLEGE – FACULTY OF ENTREPRENEURSHIP	ISI	DIGITAL WALLET ADOPTION WORLDCOINS IMPACT ON FINANCIAL TECHNOLOGY	ARTICLE	14	2023	KRAIWANIT TANPAT;LIMNA PONGSAKORN;WATTANASIN PEERAPAT;MOOLNGEARN PAPON;SATRANARAKUN ATIPON	ADV BUS REL SCI RES J	none	RANGSIT UNIVERSITY	RANGSIT UNIVERSITY		KRAIWANIT T, 2023, ADV BUS REL SCI RES J	KRAIWANIT T, 2023, ADV BUS REL SCI RES J	THAILAND	KRAIWANIT T, 2023,	wos
RABAA'I A	BEHAVIOURAL INTENTION; FINTECH; KUWAIT; MOBILE PAYMENT; MOBILE WALLET; TECHNOLOGY ACCEPTANCE; UTAUT2		DEPARTMENT OF ACCOUNTING AND MIS, ALFRED LERNER COLLEGE OF BUSINESS AND ECONOMICS, UNIVERSITY OF DELAWARE, 303 ALFRED LERNER HALL, NEWARK, 19716, DE, UNITED STATES	INT. J. BUS. INF. SYST.	DUE TO THE INCREASING POPULARITY OF SMARTPHONES AND MOBILE DEVICES, MOBILE WALLETS (M-WALLETS) ARE PROVIDING A CONVENIENT PAYMENT METHOD FOR CUSTOMERS TO COMPLETE FINANCIAL TRANSACTIONS. WITH AN AIM TO INVESTIGATE THE FACTORS THAT INFLUENCE USERS’ BEHAVIOURAL INTENTION TO USE M-WALLET APPLICATIONS, THIS STUDY EXTENDED THE UNIFIED THEORY OF ACCEPTANCE AND USE OF TECHNOLOGY (UTAUT2) MODEL. DATA FRO…	A.A. RABAA’I; DEPARTMENT OF ACCOUNTING AND MIS, ALFRED LERNER COLLEGE OF BUSINESS AND ECONOMICS, UNIVERSITY OF DELAWARE, NEWARK, 303 ALFRED LERNER HALL, 19716, UNITED STATES; EMAIL: ARABAAI@UDEL.EDU	10.1504/IJBIS.2023.135350	17460972	INTERNATIONAL JOURNAL OF BUSINESS INFORMATION SYSTEMS	ENGLISH	1	4	INDERSCIENCE PUBLISHERS	ISI	AN INVESTIGATION INTO THE ACCEPTANCE OF MOBILE WALLETS IN THE FINTECH ERA AN EMPIRICAL STUDY FROM KUWAIT	ARTICLE	44	2023	RABAA’I AHMAD A	INT J BUS INF SYST	none	UNIVERSITY OF DELAWARE	NOTREPORTED;UNIVERSITY OF DELAWARE;NOTREPORTED		RABAA'I AA, 2023, INT J BUS INF SYST	RABAA'I AA, 2023, INT J BUS INF SYST	USA	RABAA'I AA, 2023,	wos
MADYATMADJA E;PRISTINELLA D;LUCAS J;CELINE V;ALFACINO V;AGATHA J	CASHLESS; DAILY TRANSACTION; DIGITAL PAYMENT; E-WALLET; SHOPPING TRANSACTIONS	ELECTRONIC MONEY; ADDED VALUES; CASHLESS; DAILY TRANSACTION; DIGITAL PAYMENT; E- COMMERCES; E-WALLET; INDONESIA; MILLENNIALS; ONLINE SHOPPING; SHOPPING TRANSACTION; STUDENTS	SCHOOL OF INFORMATION SYSTEMS, BINA NUSANTARA UNIVERSITY, INFORMATION SYSTEMS DEPARTMENT, JAKARTA, 11480, INDONESIA; ATMA JAYA CATHOLIC UNIVERSITY OF INDONESIA, FACULTY OF PSYCHOLOGY, JAKARTA, INDONESIA	INT. CONF. BUS. IND. RES., ICBIR - PROC.	ACCORDING TO GOOD STATS, E-WALLET USERS WILL INCREASE BY 300% IN EARLY 2021. THE USE OF E-WALLETS IS VERY POPULAR WITH THE PUBLIC, ESPECIALLY MILLENNIALS AND GEN Z AT THIS TIME. CONVENIENCE, EFFICIENCY, AND EFFECTIVENESS ARE ADDED VALUES IN USING E-WALLETS. THE EXISTENCE OF CONSUMPTIVE BEHAVIOR DRIVEN BY THE DEVELOPMENT OF E-COMMERCE HAS ALSO AFFECTED THE INCREASE IN THE NUMBER OF E-WALLET USERS.…		10.1109/ICBIR57571.2023.10147618		2023 8TH INTERNATIONAL CONFERENCE ON BUSINESS AND INDUSTRIAL RESEARCH, ICBIR 2023 - PROCEEDINGS	ENGLISH	0		INSTITUTE OF ELECTRICAL AND ELECTRONICS ENGINEERS INC.	ISI	FACTORS OF USING EWALLET ON STUDENT ONLINE SHOPPING TRANSACTIONS IN INDONESIA	CONFERENCE PAPER		2023	MADYATMADJA EVARISTUS DIDIK;PRISTINELLA DEBRI;LUCAS JERRY;CELINE VANESSA;ALFACINO VINCENT;AGATHA JANETTE	INT CONF BUS IND RES, ICBIR - PROC	none	BINA NUSANTARA UNIVERSITY;ATMA JAYA CATHOLIC UNIVERSITY OF INDONESIA	BINA NUSANTARA UNIVERSITY;ATMA JAYA CATHOLIC UNIVERSITY OF INDONESIA		MADYATMADJA ED, 2023, INT CONF BUS IND RES, ICBIR - PROC	MADYATMADJA ED, 2023, INT CONF BUS IND RES, ICBIR - PROC	INDONESIA	MADYATMADJA ED, 2023, INT CONF BUS IND RES,	wos
ANWAR R;GAFFAR V;DISMAN D;FURQON C;SUTISNAWATI Y	BEHAVIORAL INTENTION; MOBILE WALLET ADOPTION; PERCEIVED EASE OF USE; PERCEIVED SECURITY; PERCEIVED TRUST; PERCEIVED USEFULNESS		MANAGEMENT DEPARTMENT, FACULTY OF ECONOMICS AND BUSINESS EDUCATION, UNIVERSITAS PENDIDIKAN INDONESIA, BANDUNG, INDONESIA; UNIVERSITAS DARMA PERSADA, JAKARTA, INDONESIA; FACULTY OF ECONOMICS AND BUSINESS EDUCATION UNIVERSITAS PENDIDIKAN INDONESIA, BANDUNG, INDONESIA; FACULTY OF ECONOMICS, DEPARTMENT, UNIVERSITAS KOMPUTER INDONESIA, BANDUNG, INDONESIA	J. EASTERN EUROPEAN CENT. ASIAN RES.	FINTECH INNOVATIONS SUCH AS MOBILE WALLETS (M-WALLET) ARE RESHAPING THE PAYMENT LANDSCAPE, M-WALLET USERS IN INDONESIA ARE RELATIVELY HIGH, BUT THERE IS A GAP IN THE NUMBER OF M-WALLET USERS BY AGE GROUP. THE HIGHEST NUMBER OF M-WALLET USERS, MOSTLY THE YOUNG GENERATION, IS BASED ON AGE. THE DIGITAL IMMIGRANT GENERATION IS ANOTHER AGE GROUP WITH THE POTENTIAL TO INCREASE BUT STILL NEEDS TO BE HIG…		10.15549/jeecar.v10i6.1499	23288272	JOURNAL OF EASTERN EUROPEAN AND CENTRAL ASIAN RESEARCH	ENGLISH	1	6	INSTITUTE OF EASTERN EUROPE AND CENTRAL ASIA	ISI	MOBILE WALLET ADAPTION MODEL AMONG DIGITAL IMMIGRANT GENERATION IN INDONESIA	ARTICLE	10	2023	ANWAR RESA NURLAELA;GAFFAR VANESSA;DISMAN DISMAN;FURQON CHAIRUL;SUTISNAWATI YAYAH	J EASTERN EUROPEAN CENT ASIAN RES	none	UNIVERSITAS PENDIDIKAN INDONESIA;UNIVERSITAS DARMA PERSADA;FACULTY OF ECONOMICS AND BUSINESS EDUCATION UNIVERSITAS PENDIDIKAN INDONESIA;UNIVERSITAS KOMPUTER INDONESIA	UNIVERSITAS PENDIDIKAN INDONESIA;UNIVERSITAS DARMA PERSADA;FACULTY OF ECONOMICS AND BUSINESS EDUCATION UNIVERSITAS PENDIDIKAN INDONESIA;UNIVERSITAS KOMPUTER INDONESIA		ANWAR RN, 2023, J EASTERN EUROPEAN CENT ASIAN RES	ANWAR RN, 2023, J EASTERN EUROPEAN CENT ASIAN RES	INDONESIA	ANWAR RN, 2023,	wos
INCISO-VERA L;LIBAQUE-SAENZ C	CONTINUANCE INTENTION; DIGITAL WALLET; INTEROPERABILITY; SOCIAL DISTANCING; SYSTEM AVAILABILITY		UNIVERSIDAD DEL PACIFICO, COLOMBIA	ISSUE. INF. SYST.	PERU IS ONE OF THE LESS FINANCIALLY INCLUSIVE COUNTRIES IN THE REGION, WHERE ALMOST 50% OF THE POPULATION IS NOT PART OF FINANCIAL INSTITUTIONS. PERUVIANS, HOWEVER, CAN BENEFIT FROM BEING PART OF THE FINANCIAL SYSTEM BECAUSE IT MAY ENABLE INDIVIDUALS TO ACCESS LOANS TO FACE SITUATIONS SUCH AS THE ONE FACED DURING THE PANDEMIC, OR SITUATIONS WHERE BUSINESS OWNERS NEED TO GROW THEIR ENTERPRISES. IN…		10.48009/1_iis_2023_103	15297314	ISSUES IN INFORMATION SYSTEMS	ENGLISH	0	1	INTERNATIONAL ASSOCIATION FOR COMPUTER INFORMATION SYSTEMS	ISI	CRITICAL FACTORS FOR DIGITAL WALLET CONTINUED USAGE INTENTION DURING PANDEMIC IN THE PERUVIAN CONTEXT	ARTICLE	24	2023	INCISO-VERA LUIS ANGEL;LIBAQUE-SAENZ CHRISTIAN FERNANDO	ISSUE INF SYST	none	UNIVERSIDAD DEL PACIFICO	UNIVERSIDAD DEL PACIFICO		INCISO-VERA LA, 2023, ISSUE INF SYST	INCISO-VERA LA, 2023, ISSUE INF SYST	COLOMBIA	INCISO-VERA LA, 2023,	wos
CHANDRAN L;LUNDIN L;PADAYATTI G	AUDITABILITY; DATA AGREEMENTS; DIGITAL WALLETS; PRIVACY; REGULATORY COMPLIANCE; TRANSPARENCY	ECOSYSTEMS; ELECTRONIC DATA INTERCHANGE; METADATA; PRIVACY-PRESERVING TECHNIQUES; TRANSPARENCY; AUDITABILITY; CENTRALIZED AND DECENTRALIZED SYSTEMS; DATA AGREEMENT; DATA SHARING; DATA TRANSACTION; DIGITAL WALLETS; HUMAN-CENTRIC; PRIVACY; PRIVACY PRESERVING; SECURITY AND PRIVACY; REGULATORY COMPLIANCE	IGRANT.IO, STOCKHOLM, SWEDEN	IEEE INT. CONF. EMERGING TECHNOL. FACTORY AUTOM., ETFA	THIS PAPER PROPOSES A COMPREHENSIVE DATA EXCHANGE FRAMEWORK THAT ADDRESSES KEY DIGITALISATION CHALLENGES AND INTEGRATES REGULATORY COMPLIANCE, USABILITY, AUDITABILITY, AND TRANSPARENCY. THE HUMAN-CENTRIC APPROACH ENABLES AUDITABLE DATA SHARING, ENHANCES SECURITY AND PRIVACY, AND APPLIES TO CENTRALISED AND DECENTRALISED SYSTEMS, AS EVALUATED IN A DIGITAL WALLET-BASED DATASPACE ECOSYSTEM. © 2023 IE…	L. CHANDRAN; IGRANT.IO, STOCKHOLM, SWEDEN; EMAIL: LAL@IGRANT.IO	10.1109/ETFA54631.2023.10275546	19460740	IEEE INTERNATIONAL CONFERENCE ON EMERGING TECHNOLOGIES AND FACTORY AUTOMATION, ETFA	ENGLISH	0		INSTITUTE OF ELECTRICAL AND ELECTRONICS ENGINEERS INC.	ISI	TRANSFORMING PERSONAL DATA TRANSACTIONS WITH AUDITABLE PRIVACYPRESERVING DATA EXCHANGE AGREEMENTS FOSTERING TRANSPARENCY AND TRUST IN DIGITAL WALLET ECOSYSTEMS	CONFERENCE PAPER	2023-SEPTEMBER	2023	CHANDRAN LAL;LUNDIN LOTTA;PADAYATTI GEORGE	IEEE INT CONF EMERGING TECHNOL FACTORY AUTOM, ETFA	none		NOTREPORTED;NOTREPORTED;NOTREPORTED		CHANDRAN L, 2023, IEEE INT CONF EMERGING TECHNOL FACTORY AUTOM, ETFA	CHANDRAN L, 2023, IEEE INT CONF EMERGING TECHNOL FACTORY AUTOM, ETFA	SWEDEN	CHANDRAN L, 2023, IEEE INT CONF EMERGING TECHNOL FACTORY AUTOM,	wos
VATSA V;AGARWAL B;GUPTA R	CUSTOMER EXPERIENCE; CUSTOMER LOYALTY; CUSTOMER SATISFACTION; LOYALTY PROGRAMS; STRUCTURAL EQUATION MODELING		AMITY COLLEGE OF COMMERCE AND FINANCE, AMITY UNIVERSITY, UTTAR PRADESH (AUUP), NOIDA, INDIA; ABES BUSINESS SCHOOL, UTTAR PRADESH, GHAZIABAD, INDIA	INNOV. MARK.	THE EMERGENCE OF DIGITAL TECHNOLOGY HAS FUNDAMENTALLY TRANSFORMED HOW BUSINESSES GENERATE VALUE FOR THEIR CUSTOMERS. ONE OF THE CRITICAL COMPONENTS OF THIS PARADIGM SHIFT IN DIGITAL TRANSFORMATION IS IMPROVING CUSTOMER EXPERIENCE, WHICH BENEFITS BOTH CONSUMERS AND ORGANIZATIONS. THIS STUDY AIMS TO EVALUATE CUSTOMER EXPERIENCE AND ITS INFLUENCE ON CUSTOMER SATISFACTION AND LOYALTY IN THE DIGITAL W…		10.21511/im.19(1).2023.20	18142427	INNOVATIVE MARKETING	ENGLISH	2	1	LLC CPC BUSINESS PERSPECTIVES	ISI	UNLOCKING THE POTENTIAL OF LOYALTY PROGRAMS IN REFERENCE TO CUSTOMER EXPERIENCE WITH DIGITAL WALLETS	ARTICLE	19	2023	VATSA VIDUSHI;AGARWAL BHAWNA;GUPTA RUCHIKA	INNOV MARK	none	AMITY UNIVERSITY;ABES BUSINESS SCHOOL	AMITY UNIVERSITY;ABES BUSINESS SCHOOL		VATSA V, 2023, INNOV MARK	VATSA V, 2023, INNOV MARK	INDIA	VATSA V, 2023,	wos
MEBRAHTOM D;HADISH S;SBHATU A;ALOQAILY M;GUIZANI M	BLOCKCHAIN; CRYPTOGRAPHY; INTEROPERABILITY; METAVERSE; SELF-SOVEREIGN IDENTITY; SMART CONTRACT; TRUST	BLOCKCHAIN; NETWORK SECURITY; VIRTUAL REALITY; BACKEND SYSTEM; BLOCK-CHAIN; DECENTRALISED; IDENTITY MANAGEMENT; METAVERSES; ON-LINE GAMING; SELF-SOVEREIGN IDENTITY; TRUST; TRUST-BUT-VERIFY; WEB 3.0; SMART CONTRACT	MOHAMED BIN ZAYED UNIVERSITY OF ARTIFICIAL INTELLIGENCE (MBZUAI), UNITED ARAB EMIRATES	INT. CONF. INTELL. METAVERSE TECHNOL. APPL., IMETA	WITH THE ADVENT OF VIRTUAL REALITY (VR) AND ONLINE GAMING, THE DECENTRALIZED METAVERSE HAS GAINED SIGNIFICANT TRACTION. HOWEVER, CHALLENGES PERTAINING TO IDENTITY MANAGEMENT AND TRUST HAVE EMERGED AS CRITICAL CONCERNS WITHIN THE DECENTRALIZED METAVERSE. TO ADDRESS THESE ISSUES, WE PRESENT AN EXTENDED PROPOSAL BUILDING UPON PREVIOUS RESEARCH, INCORPORATING THE PRINCIPLES OF SELF-SOVEREIGN IDENTITY…		10.1109/iMETA59369.2023.10294349		2023 INTERNATIONAL CONFERENCE ON INTELLIGENT METAVERSE TECHNOLOGIES AND APPLICATIONS, IMETA 2023	ENGLISH	0		INSTITUTE OF ELECTRICAL AND ELECTRONICS ENGINEERS INC.	ISI	TRUST BUT VERIFY BLOCKCHAINEMPOWERED DECENTRALIZED AUTHENTICATION SCHEMA ON THE METAVERSE A SELFSOVEREIGN IDENTITY APPROACH	CONFERENCE PAPER		2023	MEBRAHTOM DANIEL;HADISH SIEM;SBHATU ARON;ALOQAILY MOAYAD;GUIZANI MOHSEN	INT CONF INTELL METAVERSE TECHNOL APPL, IMETA	none	MOHAMED BIN ZAYED UNIVERSITY OF ARTIFICIAL INTELLIGENCE (MBZUAI)	MOHAMED BIN ZAYED UNIVERSITY OF ARTIFICIAL INTELLIGENCE (MBZUAI)		MEBRAHTOM D, 2023, INT CONF INTELL METAVERSE TECHNOL APPL, IMETA	MEBRAHTOM D, 2023, INT CONF INTELL METAVERSE TECHNOL APPL, IMETA	UNITED ARAB EMIRATES	MEBRAHTOM D, 2023, INT CONF INTELL METAVERSE TECHNOL APPL,	wos
KAMAL I;RIZKI R;AULIA M	DIGITAL PAYMENT; DIGITAL WALLET; MOBILE BANKING; WILLINGNESS TO PAY		MANAGEMENT AND BUSINESS DEPARTMENT, UNIVERSITAS PADJADJARAN, INDONESIA, JL. RAYA BANDUNG SUMEDANG KM.21, HEGARMANAH, KEC. JATINANGOR, KABUPATEN, JAWA BARAT, SUMEDANG, 45363, INDONESIA; ECONOMICS DEPARTMENT, UNIVERSITAS PADJADJARAN, INDONESIA, JL. RAYA BANDUNG SUMEDANG KM.21, HEGARMANAH, KEC. JATINANGOR, KABUPATEN, JAWA BARAT, SUMEDANG, 45363, INDONESIA; ACCOUNTING DEPARTMENT, UNIVERSITAS PADJADJA…	INT. J. PROF. BUS. REV.	PURPOSE: THIS RESEARCH AIMS TO STUDY THE IMPACT OF CHANGES IN TRANSACTION STYLES IN THE 4.0 ERA WITH MORE DEPTH, HOW CONSUMERS FROM VARIOUS LEVEL START TO USE TECHNOLOGY IN EASE OF EVERYDAY LIFE AND CONSUMER CHOICES IN THE USE OF APPLICATIONS AND THEIR WILLINGNESS TO PAY FOR THE TRANSACTION FEE, WHETHER FROM BANK INSTITUTIONS OR DIGITAL START-UP COMPANIES IN TERMS OF EFFECTIVENESS, SECURITY, AND …		10.26668/businessreview/2023.v8i2.923	25253654	INTERNATIONAL JOURNAL OF PROFESSIONAL BUSINESS REVIEW	ENGLISH	3	2	AOS-ESTRATAGIA AND INOVACAO	ISI	THE ENTHUSIASM OF DIGITAL PAYMENT SERVICES AND MILLENNIAL CONSUMER BEHAVIOUR IN INDONESIA O ENTUSIASMO DOS SERVIÇOS DE PAGAMENTO DIGITAL E O COMPORTAMENTO MILENAR DO CONSUMIDOR NA INDONÉSIA EL ENTUSIASMO POR LOS SERVICIOS DE PAGO DIGITALES Y EL COMPORTAMIENTO DE LOS CONSUMIDORES MILLENNIALS EN INDONESIA	ARTICLE	8	2023	KAMAL IRSYAD;RIZKI RAHMAH NUR;AULIA MUHAMMAD RAFIF	INT J PROF BUS REV	none	UNIVERSITAS PADJADJARAN;UNIVERSITAS PADJADJARAN;UNIVERSITAS PADJADJARAN	UNIVERSITAS PADJADJARAN;UNIVERSITAS PADJADJARAN;UNIVERSITAS PADJADJARAN		KAMAL I, 2023, INT J PROF BUS REV	KAMAL I, 2023, INT J PROF BUS REV	INDONESIA	KAMAL I, 2023,	wos
SELLUNG R;KUBACH M	DIGITAL IDENTITY; DIGITAL IDENTITY WALLET; DIGITAL WALLET; IDENTITY MANAGEMENT; IDM; PRIVACY; SECURITY; SELF-SOVEREIGN IDENTITY; SSI; USABILITY; USER EXPERIENCE	DATA PRIVACY; DIGITAL IDENTITY; DIGITAL IDENTITY WALLET; DIGITAL WALLETS; IDENTITY MANAGEMENT; IDM; PRIVACY; SECURITY; SELF-SOVEREIGN IDENTITY; SSI; USABILITY; USERS' EXPERIENCES; ELECTRONIC DOCUMENT IDENTIFICATION SYSTEMS	FRAUNHOFER IAO, NOBELSTR. 12, STUTTGART, 70569, GERMANY	LECT. NOTES INFORMATICS (LNI), PROC. - SERIES GES. INFORM. (GI)	DIGITAL IDENTITY WALLETS ARE CENTRAL COMPONENTS FOR DECENTRALISED AND SELF-SOVEREIGN IDENTITY (SSI) APPROACHES. THEY ARE THE INTERFACE FOR USERS TO MANAGE THEIR IDENTITIES AND GAIN ACCESS TO SERVICES. HENCE, THE USABILITY AND USER EXPERIENCE OF THESE WALLETS IS PIVOTAL FOR THE ADOPTION OF THOSE POPULAR AND PRIVACY FRIENDLY IDENTITY MANAGEMENT CONCEPTS. AS RESEARCH ON THE USER EXPERIENCE OF WALLET…		10.18420/OID2023_03	16175468	LECTURE NOTES IN INFORMATICS (LNI), PROCEEDINGS - SERIES OF THE GESELLSCHAFT FUR INFORMATIK (GI)	ENGLISH	1		GESELLSCHAFT FUR INFORMATIK (GI)	ISI	RESEARCH ON USER EXPERIENCE FOR DIGITAL IDENTITY WALLETS STATEOFTHEART AND RECOMMENDATIONS	CONFERENCE PAPER	P-335	2023	SELLUNG RACHELLE;KUBACH MICHAEL	LECT NOTES INFORMATICS (LNI), PROC - SERIES GES INFORM (GI)	none		NOTREPORTED		SELLUNG R, 2023, LECT NOTES INFORMATICS (LNI), PROC - SERIES GES INFORM (GI)	SELLUNG R, 2023, LECT NOTES INFORMATICS (LNI), PROC - SERIES GES INFORM (GI)	GERMANY	SELLUNG R, 2023, LECT NOTES INFORMATICS (LNI),	wos
AJINA A;JAVED H;ALI S;ZAMIL A	BEHAVIORAL REASONING THEORY; GENDER SCHEMA THEORY; MOBILE-WALLET; PAKISTAN		DEPARTMENT OF MARKETING, COLLEGE OF BUSINESS ADMINISTRATION, PRINCE SATTAM BIN ABDULAZIZ UNIVERSITY, ALKHARJ, SAUDI ARABIA; DEPARTMENT OF MANAGEMENT SCIENCES, COMSATS UNIVERSITY ISLAMABAD, SAHIWAL CAMPUS, SAHIWAL, PAKISTAN	COGENT BUS. MANAG.	THE POST-COVID-19 ERA HAS WITNESSED THE NEED FOR MOBILE-WALLET APP ADOPTION DUE TO NON-PHYSICAL TRANSACTIONS. PRIOR RESEARCHERS HAVE CAPTURED CONSUMERS’ MOBILE-WALLET ADOPTION BY INVOLVING FACILITATORS OR INHIBITORS. THE DETAILED EFFECT OF FACILITATORS AND INHABITATIONS IN DEVELOPING CONSUMERS’ INTENTION REGARDING MOBILE-WALLET APPS IN A SINGLE MODEL REMAIN UNTAPPED IN THE MARKETING LITERATURE. T…	S. ALI; DEPARTMENT OF MANAGEMENT SCIENCES, COMSATS UNIVERSITY ISLAMABAD, SAHIWAL, (SAHIWAL CAMPUS), PUNJAB, 57000, PAKISTAN; EMAIL: SAQIBALI@CUISAHIWAL.EDU.PK	10.1080/23311975.2023.2178093	23311975	COGENT BUSINESS AND MANAGEMENT	ENGLISH	5	1	COGENT OA	ISI	ARE MEN FROM MARS WOMEN FROM VENUS EXAMINING GENDER DIFFERENCES OF CONSUMERS TOWARDS MOBILEWALLET ADOPTION DURING PANDEMIC	ARTICLE	10	2023	AJINA AHMAD S;JAVED HAFIZ MUHAMMAD USAMA;ALI SAQIB;ZAMIL AHMAD M A	COGENT BUS MANAG	none	PRINCE SATTAM BIN ABDULAZIZ UNIVERSITY;COMSATS UNIVERSITY ISLAMABAD	NOTREPORTED;COMSATS UNIVERSITY ISLAMABAD;NOTREPORTED		AJINA AS, 2023, COGENT BUS MANAG	AJINA AS, 2023, COGENT BUS MANAG	PAKISTAN	AJINA AS, 2023,	wos
NOPRIANTO N;WAKHIDAH R;ARIYANTO R;SYAIFUDIN Y	DOOR ACCESS; E-IDENTITY; E-MONEY; MQTT; RFID; WEB SEVICE		DEPARTMENT OF INFORMATION TECHNOLOGY, STATE POLYTECHNIC OF MALANG, MALANG, INDONESIA	INT. J. COMPUT. DIGIT. SYST.	IN THE PAST, PEOPLE HAD TO CARRY AROUND A THICK WALLET FILLED WITH CASH WHEN THEY WANTED TO MAKE A PAYMENT. BUT NOW IT CAN BE REPLACED WITH AN ELECTRONIC WALLET (E-WALLET) OR ELECTRONIC CARD (E-MONEY). E-MONEY IS ONE EXAMPLE OF THE APPLICATION OF RFID IN THE FINANCIAL SECTOR. ALSO OFTEN USED FOR IDENTITY CARDS (E-IDENTITY). WITH RFID TECHNOLOGY, WE CAN ACCESS A ROOM OR CLASS THAT HAS AN RFID READ…		10.12785/ijcds/140162	2210142X	INTERNATIONAL JOURNAL OF COMPUTING AND DIGITAL SYSTEMS	ENGLISH	0	1	UNIVERSITY OF BAHRAIN	ISI	DOOR ACCESS SYSTEM DESIGN USING RFID TECHNOLOGY	ARTICLE	14	2023	NOPRIANTO;WAKHIDAH ROKHIMATUL;ARIYANTO RUDY;SYAIFUDIN YAN WATEQULIS	INT J COMPUT DIGIT SYST	none	DEPARTMENT OF INFORMATION TECHNOLOGY	DEPARTMENT OF INFORMATION TECHNOLOGY		NOPRIANTO N, 2023, INT J COMPUT DIGIT SYST	NOPRIANTO N, 2023, INT J COMPUT DIGIT SYST	INDONESIA	NOPRIANTO N, 2023,	wos
BEHERA S;MISHRA D;PARIDA S;PATRO A	BLOCKCHAIN; CONSENSUS ALGORITHMS; CRYPTOCURRENCY; DIGITAL WALLETS; IPFS; METAMASK WALLET; NON FUNGIBLE TOKEN; POLYGON; USER FRIENDLY	AUTHENTICATION; COMMERCE; GEOMETRY; INTEROPERABILITY; BLOCK-CHAIN; CONSENSUS ALGORITHMS; DIGITAL ASSETS; DIGITAL WALLETS; IPFS; METAMASK WALLET; NON FUNGIBLE TOKEN; POLYGON; USER FRIENDLY; USER FRIENDLY DESIGN; BLOCKCHAIN	IIIT BHUBANESWAR, ELECTRICAL & ELECTRONICS ENGINEERING, BHUBANESWAR, INDIA	INT. CONF. COMPUT. COMMUN. SYST., I3CS	A NON-FUNGIBLE TOKEN (NFT) IS A DIGITAL ASSET THAT DOES NOT HAVE A FIXED VALUE AND IT CANNOT BE REPLACED NEITHER INTERCHANGED AS IT HAS UNIQUE PROPERTIES. OVERALL, NON-FUNGIBLE TOKENS REPRESENT A SIGNIFICANT ADVANCEMENT IN THE WORLD OF DIGITAL ASSET OWNERSHIP AND AUTHENTICATION. THEY PROVIDE A MEANS OF VERIFYING THE OWNERSHIP AND AUTHENTICITY OF UNIQUE DIGITAL ASSETS, WHILE ALSO ENABLING A NEW LE…		10.1109/I3CS58314.2023.10127468		2023 4TH INTERNATIONAL CONFERENCE ON COMPUTING AND COMMUNICATION SYSTEMS, I3CS 2023	ENGLISH	1		INSTITUTE OF ELECTRICAL AND ELECTRONICS ENGINEERS INC.	ISI	PROPOSAL OF USERFRIENDLY DESIGN OF NFT MARKETPLACE	CONFERENCE PAPER		2023	BEHERA SANDIP RANJAN;MISHRA DEBANI PRASAD;PARIDA SASWATI;PATRO ADITYA RANJAN	INT CONF COMPUT COMMUN SYST, I3CS	none	ELECTRICAL AND ELECTRONICS ENGINEERING	ELECTRICAL AND ELECTRONICS ENGINEERING		BEHERA SR, 2023, INT CONF COMPUT COMMUN SYST, I3CS	BEHERA SR, 2023, INT CONF COMPUT COMMUN SYST, I3CS	INDIA	BEHERA SR, 2023, INT CONF COMPUT COMMUN SYST,	wos
HASBOLAH H;SIDEK S;MOHAMED K N;MD. I Y Y;ABDULLAH Z;ABDULLAH F	ACCEPTANCE; DIGITAL WALLET; E-WALLET; ELECTRONIC PAYMENT; PERCEIVED EASE OF USE; PERCEIVED USEFULNESS; SECURITY		FACULTY OF ENTREPRENEURSHIP AND BUSINESS, UNIVERSITI MALAYSIA KELANTAN, KOTA BHARU, MALAYSIA; FACULTY OF HOSPITALITY, TOURISM AND WELLNESS, UNIVERSITI MALAYSIA KELANTAN, KOTA BHARU, MALAYSIA	LECT. NOTES NETWORKS SYST.	IN RECENT YEARS, THE WORLD HAS EXPERIENCED THE TRANSFORMATION OF THE TECHNOLOGY AND THE ERA OF GLOBALIZATION OR EVEN BROUGHT ABOUT NUMEROUS TOOLS THAT EXTREMELY IMPORTANT TODAY. THROUGH THE INCENTIVE OF RM30 THAT HAD BEEN ANNOUNCED BY THE GOVERNMENT SPUR TOWARDS AWARENESS TO USE E-PAYMENT IN DAILY TRANSACTION. THIS STUDY AIMS TO EXAMINE MAIN AGGRAVATING FACTORS TOWARDS DIGITAL WALLET ACCEPTANCE A…	H.B. HASBOLAH; FACULTY OF ENTREPRENEURSHIP AND BUSINESS, UNIVERSITI MALAYSIA KELANTAN, KOTA BHARU, MALAYSIA; EMAIL: HAZRINA.H@UMK.EDU.MY	10.1007/978-3-031-08093-7_16	23673370	LECTURE NOTES IN NETWORKS AND SYSTEMS	ENGLISH	0		SPRINGER SCIENCE AND BUSINESS MEDIA DEUTSCHLAND GMBH	ISI	EXPLORING AGGRAVATING FACTORS TOWARDS DIGITAL WALLET ACCEPTANCE AN APPROACH FROM ONLINE SHOPPERS	CONFERENCE PAPER	485	2023	HASBOLAH HAZRINA BINTI;SIDEK SYAMSURIANA BINTI;MOHAMED KHADRI NURUL AZWA BINTI;MD ISA YUSUFF YUSRINADINI ZAHIRAH BINTI;ABDULLAH ZAILANI BIN;ABDULLAH FADHILAHANIM ARYANI BINTI	LECT NOTES NETWORKS SYST	none	UNIVERSITI MALAYSIA KELANTAN;UNIVERSITI MALAYSIA KELANTAN	NOTREPORTED;UNIVERSITI MALAYSIA KELANTAN;NOTREPORTED		HASBOLAH HB, 2023, LECT NOTES NETWORKS SYST	HASBOLAH HB, 2023, LECT NOTES NETWORKS SYST	MALAYSIA	HASBOLAH HB, 2023,	wos
BAKRI M;ALMANSOORI K;AZLAN N	E-WALLET; FINTECH; ISLAMIC FINTECH; MILLENIALS; UTAUT		FACULTY OF TECHNOLOGY MANAGEMENT AND TECHNOPRENEURSHIP, UNIVERSITI TEKNIKAL MALAYSIA MELAKA, HANG TUAH JAYA, MELAKA, DURIAN TUNGGAL, 76100, MALAYSIA; WILSON CONSTRUCTION SDN BHD, JALAN CEMPAKA SARI 1/2,TAMAN SRI CEMPAKA, JALAN JUNID, JOHOR, MUAR, 84000, MALAYSIA	GLOB. BUS. FINANCE REV.	PURPOSE: THE MAIN PURPOSE OF THIS STUDY IS TO INVESTIGATE THE BEHAVIOURAL INTENTION OF THE MILLENNIALS IN MALAYSIA TOWARD THE ACCEPTANCE OF ISLAMIC E-WALLET USAGE USING UNIFIED THEORY OF ACCEPTANCE AND USE OF TECHNOLOGY (UTAUT) VIA STRUCTURAL EQUATION MODEL. DESIGN/METHODOLOGY/APPROACH: THE DATA HAVE BEEN COLLECTED BY THE 384 MILLENNIALS IN MALAYSIA. A PERSON HAS AGED BETWEEN 25 UNTIL 40 YEARS OL…	M.H. BAKRI; FACULTY OF TECHNOLOGY MANAGEMENT AND TECHNOPRENEURSHIP, UNIVERSITI TEKNIKAL MALAYSIA MELAKA, DURIAN TUNGGAL, HANG TUAH JAYA, MELAKA, 76100, MALAYSIA; EMAIL: HARIRI@UTEM.EDU.MY	10.17549/gbfr.2023.28.1.11	10886931	GLOBAL BUSINESS AND FINANCE REVIEW	ENGLISH	8	1	PEOPLE AND GLOBAL BUSINESS ASSOCIATION	ISI	DETERMINANTS INTENTION USAGE OF ISLAMIC EWALLET AMONG MILLENNIALS	ARTICLE	28	2023	BAKRI MOHAMMED HARIRI;ALMANSOORI KHALIFA KHALFAN SALEM MUFTAH;AZLAN NUR SYAZNI MOHD	GLOB BUS FINANCE REV	none	UNIVERSITI TEKNIKAL MALAYSIA MELAKA	NOTREPORTED;UNIVERSITI TEKNIKAL MALAYSIA MELAKA;NOTREPORTED		BAKRI MH, 2023, GLOB BUS FINANCE REV	BAKRI MH, 2023, GLOB BUS FINANCE REV	MALAYSIA	BAKRI MH, 2023,	wos
BHATTACHARYA S;BERA S	EMERGING MARKETS; INTENTIONS TO USE; MOBILE WALLET; PLS-SEM; WILLINGNESS TO RECOMMEND		XIM UNIVERSITY, ODISHA, BHUBANESWAR, INDIA; OPERATIONS MANAGEMENT AREA, INDIAN INSTITUTE OF MANAGEMENT, JHARKHAND, RANCHI, INDIA	GLOBAL BUS. REV.	MOBILE WALLETS (M-WALLETS), A PARTICULAR FORM OF MOBILE PAYMENT SYSTEM, ARE GAINING CONSIDERABLE ATTENTION IN DIFFERENT EMERGING MARKETS. THIS STUDY USES THE STIMULUS-ORGANISM-RESPONSE MODEL TO UNDERSTAND HOW USER RECOMMENDATION DEPENDS ON INTENTION TO USE AND SATISFACTION IN THE M-WALLET PAYMENT SYSTEM AT THE POST-ADOPTION STAGE IN EMERGING MARKETS. THIS RESEARCH ALSO INVESTIGATES THE MEDIATING …	S. BHATTACHARYA; XIM UNIVERSITY, BHUBANESWAR, ODISHA, INDIA; EMAIL: SUBHAJIT@XIM.EDU.IN	10.1177/09721509231202315	09721509	GLOBAL BUSINESS REVIEW	ENGLISH	1		SAGE PUBLICATIONS INDIA PVT. LTD	ISI	A PLSSEM APPROACH TO INVESTIGATE THE EFFECT OF SATISFACTION ON WILLINGNESS TO RECOMMEND MWALLET SERVICES	ARTICLE		2023	BHATTACHARYA SUBHAJIT;BERA SASADHAR	GLOBAL BUS REV	none	XIM UNIVERSITY;INDIAN INSTITUTE OF MANAGEMENT	NOTREPORTED;XIM UNIVERSITY;NOTREPORTED		BHATTACHARYA S, 2023, GLOBAL BUS REV	BHATTACHARYA S, 2023, GLOBAL BUS REV	INDIA	BHATTACHARYA S, 2023,	wos
BAIMAGANBETOV T;SODNOMOVA M;AITMUKHANBETOVA E	BLOCKCHAIN; CENTRAL BANK; DIGITAL CURRENCY; DIGITAL TENGE; FIAT MONEY; NATIONAL BANK OF THE REPUBLIC OF KAZAKHSTAN	BLOCKCHAIN; RISK ASSESSMENT; BLOCK-CHAIN; CENTRAL BANK; DIGITAL TENGE; DIGITAL WALLETS; FIAT MONEY; HUMAN LIVES; INDUSTRY CHANGE; KAZAKHSTAN; NATIONAL BANK OF THE REPUBLIC OF KAZAKHSTAN; PILOT PROGRAMS; ELECTRONIC MONEY	RESEARCH AND INNOVATION CENTER 'BIG DATA AND BLOCKCHAIN TECHNOLOGIES', ASTANA IT UNIVERSITY, ASTANA, KAZAKHSTAN; ASTANA IT UNIVERSITY, ASTANA, KAZAKHSTAN; ASTANA IT UNIVERSITY, DEPARTMENT OF SOFTWARE ENGINEERING, ASTANA, KAZAKHSTAN	SIST - IEEE INT. CONF. SMART INF. SYST. TECHNOL., PROC.	EVERY YEAR, NEW TECHNOLOGIES IN EVERY INDUSTRY CHANGE THE MODEL AND STRUCTURE OF PROCESSES IN HUMAN LIFE. INCLUDING THE ECONOMY, WHICH INTERACTS SO CLOSELY WITH US. AFTER THE ADVENT OF BLOCKCHAIN TECHNOLOGY, MANY YEARS HAVE PASSED TO TEST THE VIABILITY OF DIGITAL CURRENCY AND DIGITAL WALLETS. MANY COUNTRIES ARE ALREADY INTRODUCING DIGITAL CURRENCIES AT THE STATE LEVEL. SINCE 2021, A STUDY HAS BEG…		10.1109/SIST58284.2023.10223488		SIST 2023 - 2023 IEEE INTERNATIONAL CONFERENCE ON SMART INFORMATION SYSTEMS AND TECHNOLOGIES, PROCEEDINGS	ENGLISH	0		INSTITUTE OF ELECTRICAL AND ELECTRONICS ENGINEERS INC.	ISI	ASSESSING THE RISK OF CURRENCY DIGITALIZATION IN KAZAKHSTAN	CONFERENCE PAPER		2023	BAIMAGANBETOV TALGAT;SODNOMOVA MARIIA;AITMUKHANBETOVA ELVIRA	SIST - IEEE INT CONF SMART INF SYST TECHNOL, PROC	none	ASTANA IT UNIVERSITY;ASTANA IT UNIVERSITY;ASTANA IT UNIVERSITY	ASTANA IT UNIVERSITY;ASTANA IT UNIVERSITY;ASTANA IT UNIVERSITY		BAIMAGANBETOV T, 2023, SIST - IEEE INT CONF SMART INF SYST TECHNOL, PROC	BAIMAGANBETOV T, 2023, SIST - IEEE INT CONF SMART INF SYST TECHNOL, PROC	KAZAKHSTAN	BAIMAGANBETOV T, 2023, SIST - IEEE INT CONF SMART INF SYST TECHNOL,	wos
SHARMA S;MALIK A;AHAMED A	ADOPTION; INDIA; INTERNET PENETRATION; MOBILE TECHNOLOGY; SEM; UTAUT; WALLET APP		JAYPEE INSTITUTE OF INFORMATION TECHNOLOGY, NOIDA, INDIA; UNIVERSITY OF SKÖVDE, SKÖVDE, SWEDEN	SPRINGER PROC. BUS. ECON.	MOBILE USAGE AND INTERNET CONSUMPTION HAVE MARKED TREMENDOUS GROWTH IN THE LAST DECADE. THE ADOPTION OF MOBILE TECHNOLOGY HAS GAINED THE ATTENTION OF RESEARCHERS, AND FEW STUDIES HAVE BEEN CARRIED OUT TO UNDERSTAND THE FACTORS OF MOBILE TECHNOLOGY ADOPTION. THIS STUDY AIMS TO UNDERSTAND THE FACTORS AFFECTING MOBILE WALLET APP ADOPTION AMONG INDIAN CONSUMERS. THE STUDY EXPLORES THE FACTORS THAT IM…	S. SHARMA; JAYPEE INSTITUTE OF INFORMATION TECHNOLOGY, NOIDA, INDIA; EMAIL: SHARMA.A.ASWATI@GMAIL.COM	10.1007/978-981-99-0197-5_13	21987246	SPRINGER PROCEEDINGS IN BUSINESS AND ECONOMICS	ENGLISH	0		SPRINGER NATURE	ISI	MODELLING CONSUMERS MOBILE WALLET APP ADOPTION AND ITS CONTINUOUS USAGE THE CASE OF INDIA	CONFERENCE PAPER		2023	SHARMA SWATI;MALIK ANSHUL;AHAMED A F M JALAL	SPRINGER PROC BUS ECON	none	JAYPEE INSTITUTE OF INFORMATION TECHNOLOGY;UNIVERSITY OF SKÖVDE	NOTREPORTED;JAYPEE INSTITUTE OF INFORMATION TECHNOLOGY;NOTREPORTED		SHARMA S, 2023, SPRINGER PROC BUS ECON	SHARMA S, 2023, SPRINGER PROC BUS ECON	SWEDEN	SHARMA S, 2023,	wos
TIKKU S;SINGH A	COVID-19; DIGITALIZATION; E-WALLETS; FINANCIAL INCLUSION; MICRO ENTREPRENEURS; NCR	FINANCE; INDUSTRIAL ECONOMICS; DIGITALIZATION; E-WALLET; EMPIRICAL STUDIES; ENDOGENOUS FACTORS; EXOGENOUS FACTORS; FINANCIAL INCLUSIONS; GLOBAL ECONOMIES; MICRO ENTREPRENEUR; MICROENTREPRENEURS; NATIONAL CAPITAL REGIONS; COVID-19	AMITY BUSINESS SCHOOL, AMITY UNIVERSITY, NOIDA, INDIA	INT. J. E-COLLAB.	THE COVID-19 PANDEMIC IS EXPEDITIOUSLY STIRRING THE GLOBAL ECONOMY. THE IMPACT OF THIS PANDEMIC HAS IMPLICATIONS ON THE SUSTENANCE OF INDUSTRIES WORLDWIDE. THIS STUDY INVESTIGATES THE INFLUENCE OF VARIOUS ENDOGENOUS AND EXOGENOUS FACTORS AFFECTING E-WALLET ADOPTION AMONG MICRO ENTREPRENEURS IN INDIA. A SAMPLE OF 287 MICRO ENTERPRISES WERE IDENTIFIED IN NCR (NATIONAL CAPITAL REGION) REGION ON THE …		10.4018/IJeC.315780	15483673	INTERNATIONAL JOURNAL OF E-COLLABORATION	ENGLISH	1	1	IGI GLOBAL	ISI	FINANCIAL DISRUPTION AND MICROENTREPRENEURS EMPIRICAL STUDY ON ADOPTION OF EWALLET AMONG MICROENTREPRENEURS IN INDIA	ARTICLE	19	2023	TIKKU SONAL RAINA;SINGH ANJANI K	INT J E-COLLAB	none	AMITY UNIVERSITY	AMITY UNIVERSITY		TIKKU SR, 2023, INT J E-COLLAB	TIKKU SR, 2023, INT J E-COLLAB	INDIA	TIKKU SR, 2023,	wos
GHAHARIAN K;ABARBANEL B;KRAUS S;SINGH A;BERNHARD B	BEHAVIORAL TRACKING; CLUSTER ANALYSIS; DIGITAL PAYMENTS; GAMBLING; MACHINE LEARNING; RESPONSIBLE GAMBLING		INTERNATIONAL GAMING INSTITUTE, UNIVERSITY OF NEVADA, LAS VEGAS, NV, UNITED STATES; WILLIAM F. HARRAH COLLEGE OF HOSPITALITY, UNIVERSITY OF NEVADA, LAS VEGAS, NV, UNITED STATES; DEPARTMENT OF PSYCHOLOGY, UNIVERSITY OF NEVADA, LAS VEGAS, NV, UNITED STATES	INT. GAMBL. STUD.	A GAMBLER’S PAYMENT BEHAVIOR–THE DEPOSIT AND WITHDRAWAL OF FUNDS–PRECEDES AND FOLLOWS THE ACT OF GAMBLING. GIVEN THIS SEPARATION, THE METHODS AND RESULTS OF MACHINE LEARNING MODELS BUILT AT THE PAYMENT-LEVEL COULD BE BETTER GENERALIZED ACROSS GAMBLING FORMATS. WITH THIS STUDY, WE EMPIRICALLY EVALUATED THIS NOTION BY VALIDATING A CLUSTER ANALYSIS ACROSS TWO INDEPENDENT DATASETS OF DIGITAL WALLET P…	K. GHAHARIAN; INTERNATIONAL GAMING INSTITUTE, UNIVERSITY OF NEVADA, LAS VEGAS, 4505 S. MARYLAND PKWY, 89154, UNITED STATES; EMAIL: KASRA.GHAHARIAN@UNLV.EDU	10.1080/14459795.2023.2218460	14459795	INTERNATIONAL GAMBLING STUDIES	ENGLISH	0	1	ROUTLEDGE	ISI	EVALUATING THE GENERALIZABILITY OF PAYMENT BEHAVIORAL PROFILES ACROSS GAMBLING BRANDS	ARTICLE	24	2024	GHAHARIAN KASRA;ABARBANEL BRETT;KRAUS SHANE W;SINGH ASHOK;BERNHARD BO	INT GAMBL STUD	none	UNIVERSITY OF NEVADA;UNIVERSITY OF NEVADA;UNIVERSITY OF NEVADA	NOTREPORTED;UNIVERSITY OF NEVADA;NOTREPORTED		GHAHARIAN K, 2024, INT GAMBL STUD	GHAHARIAN K, 2024, INT GAMBL STUD	USA	GHAHARIAN K, 2024,	wos
NOWROOZI E;SEYEDSHOARI S;MEKDAD Y;SAVAŞ E;CONTI M	BLOCKCHAIN; CRYPTOCURRENCIES; CRYPTOWALLET; CYBERSECURITY; DIGITAL WALLET; SECURITY; TRANSACTIONS		COMPUTER ENGINEERING DEPARTMENT, FACULTY OF ENGINEERING AND NATURAL SCIENCES, BAHÇEŞEHIR UNIVERSITY (BAHCESEHIR UNIVERSITY), ISTANBUL, TURKEY; DEPARTMENT OF MATHEMATICS, UNIVERSITY OF PADUA, PADUA, ITALY; CYBER-PHYSICAL SYSTEMS SECURITY LAB, DEPARTMENT OF ELECTRICAL AND COMPUTER ENGINEERING, FLORIDA INTERNATIONAL UNIVERSITY, MIAMI, FL, UNITED STATES; FACULTY OF ENGINEERING AND NATURAL SCIENCES, S…	ADVANCES IN INFORMATION SECURITY	DIGITAL WALLET AS A SOFTWARE PROGRAM OR A DIGITAL DEVICE ALLOWS USERS TO CONDUCT VARIOUS TRANSACTIONS. HOT AND COLD DIGITAL WALLETS ARE CONSIDERED AS TWO TYPES OF THIS WALLET. DIGITAL WALLETS NEED AN ONLINE CONNECTION FALL INTO THE FIRST GROUP, WHEREAS DIGITAL WALLETS CAN OPERATE WITHOUT INTERNET CONNECTION BELONG TO THE SECOND GROUP. PRIOR TO BUYING A DIGITAL WALLET, IT IS IMPORTANT TO DEFINE FO…	E. NOWROOZI; COMPUTER ENGINEERING DEPARTMENT, FACULTY OF ENGINEERING AND NATURAL SCIENCES, BAHÇEŞEHIR UNIVERSITY (BAHCESEHIR UNIVERSITY), ISTANBUL, TURKEY; EMAIL: EHSAN.NOWROOZI@ENG.BAU.EDU.TR	10.1007/978-3-031-25506-9_1	15682633	ADVANCES IN INFORMATION SECURITY	ENGLISH	2		SPRINGER	ISI	CRYPTOCURRENCY WALLETS ASSESSMENT AND SECURITY	BOOK CHAPTER	102	2023	NOWROOZI EHSAN;SEYEDSHOARI SEYEDSADRA;MEKDAD YASSINE;SAVAŞ ERKAY;CONTI MAURO	ADVANCES IN INFORMATION SECURITY	none	BAHÇEŞEHIR UNIVERSITY (BAHCESEHIR UNIVERSITY);UNIVERSITY OF PADUA;FLORIDA INTERNATIONAL UNIVERSITY;SABANCI UNIVERSITY	NOTREPORTED;BAHÇEŞEHIR UNIVERSITY (BAHCESEHIR UNIVERSITY);NOTREPORTED		NOWROOZI E, 2023, ADVANCES IN INFORMATION SECURITY	NOWROOZI E, 2023, ADVANCES IN INFORMATION SECURITY	TURKEY	NOWROOZI E, 2023,	wos
YUNOH M;HASHIM N;MUSA Z;MUHAMAD M;HASSAN A;BAHARI N	ADOPTION; E-WALLET; SOCIAL SECURITY; TRUST		FACULTY OF ENTREPRENEURSHIP AND BUSINESS, UNIVERSITI MALAYSIA KELANTAN (UMK), KELANTAN, MALAYSIA	TELKOMNIKA TELECOMUN. COMPT. ELECTR. CONTROL	E-WALLETS HAVE BECOME INCREASINGLY POPULAR AROUND THE WORLD. THIS RESEARCH WAS CONDUCTED TO STUDY THE RELATIONSHIP BETWEEN THE FACTORS AND ADOPTION OF E-WALLET. THE POPULATION THAT INVOLVED IN THIS RESEARCH IS YOUTHS AT TELUK INTAN, PERAK. THIS STUDY WILL INVESTIGATE THE RELATIONSHIP BETWEEN INDEPENDENT VARIABLE WITH DEPENDENT VARIABLE. THE INDEPENDENT VARIABLES FOR THIS RESEARCH ARE SOCIAL INFLU…	M.N.M. YUNOH; FACULTY OF ENTREPRENEURSHIP AND BUSINESS, UNIVERSITI MALAYSIA KELANTAN (UMK), 16100 KOTA BHARU, KELANTAN, MALAYSIA; EMAIL: NAQIB@UMK.EDU.MY	10.12928/TELKOMNIKA.v21i6.24082	16936930	TELKOMNIKA (TELECOMMUNICATION COMPUTING ELECTRONICS AND CONTROL)	ENGLISH	0	6	UNIVERSITAS AHMAD DAHLAN	ISI	UNDERSTANDING THE FACTORS INFLUENCING THE ADOPTION OF EWALLETS BY MALAYSIAN YOUTH	ARTICLE	21	2023	YUNOH MUHAMMAD NAQIB MAT;HASHIM NURUL SYAHIRAH MOHAMED;MUSA ZULKARAMI CHE;MUHAMAD MAHATHIR;HASSAN ABD AZIZ MAT;BAHARI NORZALIZAH	TELKOMNIKA TELECOMUN COMPT ELECTR CONTROL	none	UNIVERSITI MALAYSIA KELANTAN (UMK)	NOTREPORTED;UNIVERSITI MALAYSIA KELANTAN (UMK);NOTREPORTED		YUNOH MNM, 2023, TELKOMNIKA TELECOMUN COMPT ELECTR CONTROL	YUNOH MNM, 2023, TELKOMNIKA TELECOMUN COMPT ELECTR CONTROL	MALAYSIA	YUNOH MNM, 2023,	wos
GOEL A;BISHT V;CHAUDHARY S	CRYPTO WALLET; MULTISIGNATURE	CRIME; NETWORK SECURITY; CRYPTO WALLET; DIGITAL ASSETS; DIGITAL WALLETS; LARGE-SCALE TRANSACTIONS; MULTI-SIGNATURE; PERSONAL COMPUTING	GALGOTIAS UNIVERSITY, DEPARTMENT OF COMPUTER SCIENCE & ENGINERING, GREATER NOIDA, INDIA	PROC. INT. CONF. COMMUN. ELECTRON. SYST., ICCES	MULTI SIGNATURES TECHNOLOGY IS USED IN DIGITAL WALLETS TO INCREASE THE SECURITY OF CRYPTOGRAPHY TRANSACTIONS. IT REQUIRES THE APPROVAL OF MULTIPLE PARTIES BEFORE THE TRANSACTION CAN BE PROCESSED, REDUCING THE RISK OF FRAUD OR THEFT. MULTI SIGNATURE TECHNOLOGY IS PARTICULARLY USEFUL FOR LARGE SCALE TRANSACTIONS, WHERE MULTIPLE PARTIES MAY BE INVOLVED. IT CAN BE USED BY INDIVIDUALS OR ORGANIZATIONS…	A.K. GOEL; GALGOTIAS UNIVERSITY, DEPARTMENT OF COMPUTER SCIENCE & ENGINERING, GREATER NOIDA, INDIA; EMAIL: AMIT.GOEL@GALGOTIASUNIVERSITY.EDU.IN	10.1109/ICCES57224.2023.10192591		PROCEEDINGS OF THE 8TH INTERNATIONAL CONFERENCE ON COMMUNICATION AND ELECTRONICS SYSTEMS, ICCES 2023	ENGLISH	0		INSTITUTE OF ELECTRICAL AND ELECTRONICS ENGINEERS INC.	ISI	MULTISIGNATURE CRYPTO WALLET PAPER	CONFERENCE PAPER		2023	GOEL AMIT KUMAR;BISHT VIBHOR SINGH;CHAUDHARY SHREYASHI	PROC INT CONF COMMUN ELECTRON SYST, ICCES	none	GALGOTIAS UNIVERSITY	NOTREPORTED;GALGOTIAS UNIVERSITY;EMAIL: AMIT.GOEL@GALGOTIASUNIVERSITY.EDU.IN		GOEL AK, 2023, PROC INT CONF COMMUN ELECTRON SYST, ICCES	GOEL AK, 2023, PROC INT CONF COMMUN ELECTRON SYST, ICCES	INDIA	GOEL AK, 2023, PROC INT CONF COMMUN ELECTRON SYST,	wos
LOGESHWARAN J;GORANTLA V;GUDE V;GORANTLA B	BLOCKCHAIN; CRYPTO CURRENCY; CYBER SECURITY; DDOS; DIGITAL WALLETS; MALICIOUS ATTACKS	BLOCKCHAIN; CRYPTOGRAPHY; DENIAL-OF-SERVICE ATTACK; NETWORK SECURITY; BLOCK-CHAIN; CYBER SECURITY; DIGITAL WALLETS; DISTRIBUTED DENIAL OF SERVICE; MALICIOUS ATTACK; PERFORMANCE; PERFORMANCES ANALYSIS; SECURITY ISSUES; SECURITY RISKS; SYSTEMS PERFORMANCE; CYBERSECURITY	SRI ESHWAR COLLEGE OF ENGINEERING, DEPARTMENT OF ELECTRONICS AND COMMUNICATION ENGINEERING, TAMILNADU, COIMBATORE, INDIA; SOLUTION ARCHITECT, UNITED STATES; SOFTWARE ENGINEER, UNITED STATES	PROC. INT. CONF. CONTEMP. COMPUT. INFORMATICS, IC3I	CRYPTO CURRENCY IS SUBJECT TO PERSISTENT AND DYNAMIC CYBER SECURITY RISKS. AS WITH ALL TYPES OF ONLINE ASSETS, DIGITAL WALLETS, EXCHANGES AND EVEN INDIVIDUAL USER ACCOUNTS ARE OFTEN SUBJECT TO BOTH MALICIOUS ATTACKS AND OTHER VULNERABILITIES. BLOCKCHAIN TECHNOLOGY, DUE TO ITS DISTRIBUTED NATURE, IS MORE SECURE AND PROVIDES A STRONG PLATFORM ON WHICH TO BUILD DIGITAL CURRENCY PLATFORMS. THIS PAPER…		10.1109/IC3I59117.2023.10397950		PROCEEDINGS OF INTERNATIONAL CONFERENCE ON CONTEMPORARY COMPUTING AND INFORMATICS, IC3I 2023	ENGLISH	1		INSTITUTE OF ELECTRICAL AND ELECTRONICS ENGINEERS INC.	ISI	THE SMART PERFORMANCE ANALYSIS OF CYBER SECURITY ISSUES IN CRYPTO CURRENCY USING BLOCKCHAIN	CONFERENCE PAPER		2023	LOGESHWARAN J;GORANTLA VENKATA ASHOK K;GUDE VENKATARAMAIAH;GORANTLA BHARGAVI	PROC INT CONF CONTEMP COMPUT INFORMATICS, IC3I	none	SRI ESHWAR COLLEGE OF ENGINEERING;SOLUTION ARCHITECT	SRI ESHWAR COLLEGE OF ENGINEERING;SOLUTION ARCHITECT;NOTREPORTED		LOGESHWARAN J, 2023, PROC INT CONF CONTEMP COMPUT INFORMATICS, IC3I	LOGESHWARAN J, 2023, PROC INT CONF CONTEMP COMPUT INFORMATICS, IC3I	USA	LOGESHWARAN J, 2023, PROC INT CONF CONTEMP COMPUT INFORMATICS,	wos
JINGNAN J;TEO P;HO T;HOOI L C	E-WALLET; MALAYSIA; PERCEIVED BENEFITS; PERCEIVED SACRIFICE; PERCEIVED VALUE; VALUE-BASED ADOPTION MODEL		FACULTY OF ARTS AND SOCIAL SCIENCES, UNIVERSITI MALAYA, KUALA LUMPUR, MALAYSIA; AZMAN HASHIM INTERNATIONAL BUSINESS SCHOOL, UNIVERSITI TEKNOLOGI MALAYSIA, KUALA LUMPUR, MALAYSIA; PURCHASING DEPARTMENT, AXIS STONE MARKETING SDN BHD, SELANGOR, MALAYSIA	COGENT BUS. MANAG.	THE PURPOSE OF THIS STUDY IS TO VALIDATE THE VALUE-BASED ADOPTION MODEL (VAM) IN ORDER TO INVESTIGATE YOUNG MALAYSIANS’ E-WALLET ADOPTION INTENTIONS. A STRUCTURED QUESTIONNAIRE WAS USED TO COLLECT 214 QUESTIONNAIRES. THE HYPOTHESES PROPOSED FOR THIS STUDY WERE TESTED USING SMARTPLS, A SECOND-GENERATION ANALYSIS OF PARTIAL LEAST SQUARES (PLS). PERCEIVED SACRIFICE AND PERCEIVED BENEFIT INFLUENCED P…	P.-C. TEO; AZMAN HASHIM INTERNATIONAL BUSINESS SCHOOL, UNIVERSITI TEKNOLOGI MALAYSIA, KUALA LUMPUR, 54100, MALAYSIA; EMAIL: POHCHUIN@UTM.MY	10.1080/23311975.2023.2244756	23311975	COGENT BUSINESS AND MANAGEMENT	ENGLISH	0	2	COGENT OA	ISI	THE BEHAVIORAL INTENTION OF YOUNG MALAYSIANS TOWARDS CASHLESS SOCIETY VALUEBASED ADOPTION MODEL	ARTICLE	10	2023	JINGNAN JU;TEO POH-CHUIN;HO THERESA CF;HOOI LING CHEN	COGENT BUS MANAG	none	UNIVERSITI MALAYA;UNIVERSITI TEKNOLOGI MALAYSIA	NOTREPORTED;UNIVERSITI TEKNOLOGI MALAYSIA;NOTREPORTED		JINGNAN J, 2023, COGENT BUS MANAG	JINGNAN J, 2023, COGENT BUS MANAG	MALAYSIA	JINGNAN J, 2023,	wos
KARAVIDAS L;TSIATSOS T;STAMELOS I	GAMIFICATION; LEARNING MANAGEMENT SYSTEMS; SOFT SKILLS	GRADING; LEARNING SYSTEMS; 'CURRENT; GAMIFICATION; GRADING RUBRICS; GROUP COMMUNICATIONS; INFORMATION LITERACY; LABOUR MARKET; LEARNING MANAGEMENT SYSTEM; SOFT SKILLS; TECHNICAL SKILLS; WORK PERFORMANCE; STUDENTS	ARISTOTLE UNIVERSITY OF THESSALONIKI, COMPUTER SCIENCE DEPARTMENT, THESSALONIKI, GREECE	IEEE GLOBAL ENG. EDU. CONF., EDUCON	TECHNICAL SKILLS ARE INSUFFICIENT TO GAIN EMPLOYMENT IN BIG ORGANIZATIONS AND IN-DEMAND PROFESSIONS IN THE CURRENT LABOR MARKET. CURRENT AND ASPIRING FIRM EXECUTIVES PLACE A SIGNIFICANT FOCUS ON THE DEVELOPMENT OF SOFT SKILLS SINCE THEY ARE CRUCIAL TO WORK PERFORMANCE. TO IMPROVE THE SOFT AND HARD SKILLS OF STUDENTS THROUGH THE USAGE OF A LEARNING MANAGEMENT SYSTEM IN THEIR LESSONS, A GAMIFICATIO…		10.1109/EDUCON54358.2023.10125245	21659559	IEEE GLOBAL ENGINEERING EDUCATION CONFERENCE, EDUCON	ENGLISH	0		IEEE COMPUTER SOCIETY	ISI	ENHANCING SKILLS IN BACHELOR CLASSES BY GAMIFYING LEARNING MANAGEMENT SYSTEMS	CONFERENCE PAPER	2023-MAY	2023	KARAVIDAS LAMPROS;TSIATSOS THRASYVOULOS;STAMELOS IOANNIS	IEEE GLOBAL ENG EDU CONF, EDUCON	none	ARISTOTLE UNIVERSITY OF THESSALONIKI	ARISTOTLE UNIVERSITY OF THESSALONIKI		KARAVIDAS L, 2023, IEEE GLOBAL ENG EDU CONF, EDUCON	KARAVIDAS L, 2023, IEEE GLOBAL ENG EDU CONF, EDUCON	GREECE	KARAVIDAS L, 2023, IEEE GLOBAL ENG EDU CONF,	wos
ABUHASHESH M;ALMASHHADANI I;ALSHURIDEH M;AL-KHASAWNEH M	BEHAVIORAL INTENTION; FINANCIAL RISKS; FINTECH; PERCEIVED EASE OF USE; PRIVACY RISKS; TECHNOLOGY ADOPTION	STATISTICAL MECHANICS; BEHAVIORAL INTENTION; FINANCIAL RISKS; INTENTION TO USE; MOBILE BANKINGS; PERCEIVED EASE-OF-USE; PRIVACY RISKS; QUANTITATIVE METHOD; STATISTICAL TOOLS; STRUCTURAL EQUATION MODELS; TECHNOLOGY ADOPTION; DIGITAL STORAGE	E-MARKETING AND SOCIAL MEDIA DEPARTMENT, PRINCESS SUMAYA UNIVERSITY FOR TECHNOLOGY (PSUT), AMMAN, JORDAN; BUSINESS ENTREPRENEURSHIP, PRINCESS SUMAYA UNIVERSITY FOR TECHNOLOGY (PSUT), AMMAN, 11941, JORDAN; DEPARTMENT OF MARKETING, SCHOOL OF BUSINESS, THE UNIVERSITY OF JORDAN, AMMAN, 11942, JORDAN; DEPARTMENT OF MANAGEMENT, COLLEGE OF BUSINESS, UNIVERSITY OF SHARJAH, SHARJAH, 27272, UNITED ARAB EMI…	LECTURE. NOTES. DATA ENG. COMMUN. TECH.	THIS STUDY AIMED TO LOOK INTO FINTECH ADOPTION IN JORDAN. THREE PREDICTORS WERE HYPOTHESIZED TO TEST THEIR IMPACT ON BEHAVIORAL INTENTION: PERCEIVED EASE OF USE, FINANCIAL RISKS, AND PRIVACY RISKS. THE RESEARCHER APPLIED A QUANTITATIVE METHOD. THE RESEARCHER USED CONVENIENCE SAMPLING TO COLLECT DATA. IN CONCLUSION, THE SAMPLE COMPRISED 296 RESPONDENTS WHO WERE RESIDENTS OF JORDAN AND USERS OF FIN…	M. ABUHASHESH; E-MARKETING AND SOCIAL MEDIA DEPARTMENT, PRINCESS SUMAYA UNIVERSITY FOR TECHNOLOGY (PSUT), AMMAN, JORDAN; EMAIL: M.ABUHASHESH@PSUT.EDU.JO	10.1007/978-3-031-43247-7_22	23674512	LECTURE NOTES ON DATA ENGINEERING AND COMMUNICATIONS TECHNOLOGIES	ENGLISH	1		SPRINGER SCIENCE AND BUSINESS MEDIA DEUTSCHLAND GMBH	ISI	EXPLORING FACTORS THAT DRIVE FINTECH ADOPTION IN JORDAN	CONFERENCE PAPER	184	2023	ABUHASHESH MOHAMMAD;ALMASHHADANI IBRAHIM S;ALSHURIDEH MUHAMMAD TURKI;AL-KHASAWNEH MOHAMMAD	LECTURE NOTES DATA ENG COMMUN TECH	none	PRINCESS SUMAYA UNIVERSITY FOR TECHNOLOGY (PSUT);PRINCESS SUMAYA UNIVERSITY FOR TECHNOLOGY (PSUT);THE UNIVERSITY OF JORDAN;UNIVERSITY OF SHARJAH;APPLIED SCIENCE PRIVATE UNIVERSITY;PRINCESS SUMAYA UNIVERSITY FOR TECHNOLOGY (PSUT)	NOTREPORTED;PRINCESS SUMAYA UNIVERSITY FOR TECHNOLOGY (PSUT);NOTREPORTED		ABUHASHESH M, 2023, LECTURE NOTES DATA ENG COMMUN TECH	ABUHASHESH M, 2023, LECTURE NOTES DATA ENG COMMUN TECH	JORDAN	ABUHASHESH M, 2023,	wos
SATTARIVAND M;BABAIE S;RAHMANI A	CARD EMULATION; NEAR FIELD COMMUNICATION (NFC); NFC PAYMENT; NFC SECURITY		DEPARTMENT OF COMPUTER ENGINEERING, SCIENCE AND RESEARCH BRANCH, ISLAMIC AZAD UNIVERSITY, TEHRAN, IRAN; DEPARTMENT OF COMPUTER ENGINEERING, ISLAMIC AZAD UNIVERSITY, TABRIZ BRANCH, TABRIZ, IRAN	J. INF. SYST. TELECOMMUN.	NEAR FIELD COMMUNICATION (NFC), AS A SHORT-RANGE WIRELESS CONNECTIVITY TECHNOLOGY, MAKES IT EASIER FOR ELECTRONIC DEVICES TO STAY IN TOUCH. THIS TECHNOLOGY, DUE TO ITS ADVANTAGES SUCH AS SECURE ACCESS, COMPATIBILITY, AND EASE OF USE, CAN BE UTILIZED IN MULTIPLE APPLICATIONS IN VARIOUS DOMAINS SUCH AS BANKING, FILE TRANSFERRING RESERVATIONS, BOOKING TICKETS, REDEEMING, ENTRY/EXIT PASSES, AND PAYME…	S. BABAIE; DEPARTMENT OF COMPUTER ENGINEERING, ISLAMIC AZAD UNIVERSITY, TABRIZ, TABRIZ BRANCH, IRAN; EMAIL: SH.BABAIE@IAUT.AC.IR		23221437	JOURNAL OF INFORMATION SYSTEMS AND TELECOMMUNICATION	ENGLISH	1	3	IRANIAN ACADEMIC CENTER FOR EDUCATION, CULTURE AND RESEARCH	ISI	A SURVEY ON NFC PAYMENT APPLICATIONS REWSEARCH CHALLENGES AND FUTURE DIRECTIONS	ARTICLE	11	2023	SATTARIVAND MEHDI;BABAIE SHAHRAM;RAHMANI AMIR MASOUD	J INF SYST TELECOMMUN	none	ISLAMIC AZAD UNIVERSITY;ISLAMIC AZAD UNIVERSITY	NOTREPORTED;ISLAMIC AZAD UNIVERSITY;NOTREPORTED		SATTARIVAND M, 2023, J INF SYST TELECOMMUN	SATTARIVAND M, 2023, J INF SYST TELECOMMUN	IRAN	SATTARIVAND M, 2023,	wos
NEHA N;SHARMA M;MONTEIRO T			IILM UNIVERSITY, HARYANA, GURUGRAM, INDIA; CHANDIGARH GROUP OF COLLEGES, INDIA; K R MANGALAM UNIVERSITY, INDIA	ARTIFICIAL INTELLIGENCE, FINTECH, AND FINANCIAL INCLUSION	INDIA IS CURRENTLY THE FIFTH FASTEST-GROWING DEVELOPING NATION IN THE WORLD, AND IT HAS UNQUESTIONABLY MADE THE BIGGEST INROADS INTO THE FINTECH BUSINESS IN RECENT YEARS. IN INDIA, IDEAS LIKE PAPERLESS LOANS, MOBILE BANKING, SAFE PAYMENT GATEWAYS, MOBILE WALLETS, AND OTHERS ARE ALREADY BECOMING COMMON PLACE. THE CURRENT STUDY FOCUSES ON COMPREHENDING HOW FINTECH IS APPLIED IN THE INDIAN BANKING I…		10.1201/9781003125204-6		ARTIFICIAL INTELLIGENCE, FINTECH, AND FINANCIAL INCLUSION	ENGLISH	0		CRC PRESS	ISI	WHY DO BANK CUSTOMERS ADOPT FINTECH SOLUTION THE CASE OF INDIA	BOOK CHAPTER		2023	NEHA;SHARMA MAMTA;MONTEIRO THOMAS	ARTIFICIAL INTELLIGENCE, FINTECH, AND FINANCIAL INCLUSION	none	IILM UNIVERSITY;CHANDIGARH GROUP OF COLLEGES;K R MANGALAM UNIVERSITY	IILM UNIVERSITY;CHANDIGARH GROUP OF COLLEGES;K R MANGALAM UNIVERSITY		NEHA N, 2023, ARTIFICIAL INTELLIGENCE, FINTECH, AND FINANCIAL INCLUSION	NEHA N, 2023, ARTIFICIAL INTELLIGENCE, FINTECH, AND FINANCIAL INCLUSION	INDIA	NEHA N, 2023, ARTIFICIAL INTELLIGENCE, FINTECH,	wos
GARCÍA J;FAVELA J;SÁNCHEZ-TORRES C	BLOCKCHAIN; CONSCIOUSLY-TRAINED IA; DAPP; DATA PRIVACY	BLOCKCHAIN; HEALTH CARE; MACHINE LEARNING; BLOCK-CHAIN; CONSCIOUSLY-TRAINED IA; DAPP; DATA PROVENANCE; DECENTRALIZED NETWORKS; HEALTH DATA; LABELINGS; MACHINE-LEARNING; REFERENCE ARCHITECTURE; USER PRIVACY; DATA PRIVACY	CICESE, CARRETERA ENSENADA, TIJUANA NO. 3918, B.C., ENSENADA, MEXICO; UABC, CARRETERA ENSENADA, TIJUANA NO. 3917, B.C., ENSENADA, MEXICO	LECT. NOTES NETWORKS SYST.	ADVANCES IN MACHINE LEARNING HAVE HIGHLIGHTED THE IMPORTANCE OF GATHERING AND LABELING DATA, PARTICULARLY IN SETTINGS SUCH AS HEALTHCARE. ISSUES OF OWNERSHIP, PRIVACY, DATA PROVENANCE, BIAS IN TRAINED MODELS AND INFORMED CONSENT, HAVE RAISED AN INTEREST IN THE ETHICAL USE OF PERSONAL DATA. WE INTRODUCE THREAD, A REFERENCE ARCHITECTURE RAISED ON A DECENTRALIZED NETWORK TO GATHER HEALTHCARE DATA, S…	J. FAVELA; CICESE, CARRETERA ENSENADA, ENSENADA, TIJUANA NO. 3918, B.C., MEXICO; EMAIL: FAVELA@CICESE.MX	10.1007/978-3-031-48642-5_28	23673370	LECTURE NOTES IN NETWORKS AND SYSTEMS	ENGLISH	0		SPRINGER SCIENCE AND BUSINESS MEDIA DEUTSCHLAND GMBH	ISI	TRACEABLE HEALTH DATA FORCONSCIOUSLY TRAINED ML MODELS	CONFERENCE PAPER	842 LNNS	2023	GARCÍA JOSÉ R;FAVELA JESÚS;SÁNCHEZ-TORRES CARLOS E	LECT NOTES NETWORKS SYST	none	NOTREPORTED	NOTREPORTED;NOTREPORTED;NOTREPORTED		GARCÍA JR, 2023, LECT NOTES NETWORKS SYST	GARCÍA JR, 2023, LECT NOTES NETWORKS SYST	MEXICO	GARCÍA JR, 2023,	wos
KRAUß A;KOSTIC S;SELLUNG R	DIGITAL IDENTITY; DIGITAL WALLET; IDENTITY MANAGEMENT; PRIVACY; SSI; USABILITY; USER EXPERIENCE; USER SCENARIO	DATA PRIVACY; DIGITAL IDENTITY; DIGITAL WALLETS; IDENTITY MANAGEMENT; PRIVACY; RECENT RESEARCHES; SSI; USABILITY; USER FRIENDLY; USER SCENARIO; USERS' EXPERIENCES; ELECTRONIC DOCUMENT IDENTIFICATION SYSTEMS	HOCHSCHULE FÜR TECHNIK UND WIRTSCHAFT DRESDEN, DIGITAL SERVICE SYSTEMS, SACHSEN, DRESDEN, GERMANY; FRAUNHOFER AISEC, SECURE SYSTEMS ENGINEERING, BREITE STR. 12, BERLIN, 14199, GERMANY; FRAUNHOFER IAO, IDENTITY MANAGEMENT, NOBELSTRASSE 12, STUTTGART, 70569, GERMANY	LECT. NOTES INFORMATICS (LNI), PROC. - SERIES GES. INFORM. (GI)	IDENTITY WALLETS ENABLE THE MANAGEMENT AND USE OF DIGITAL IDENTITIES AND VERIFICATION DOCUMENTS STORED IN ONE APP. USERS MANAGE THEIR DATA INDEPENDENTLY AND DECIDE FOR THEMSELVES WHICH DATA THEY WANT TO DISCLOSE FOR IDENTIFICATION PURPOSES. RECENT RESEARCH SHOWS THAT CURRENT DIGITAL WALLETS FACE MANY USABILITY PROBLEMS, WHICH MAKES IT DIFFICULT FOR USERS TO GRASP THEIR CONCEPT AND HOW TO USE THEM…		10.18420/OID2023_06	16175468	LECTURE NOTES IN INFORMATICS (LNI), PROCEEDINGS - SERIES OF THE GESELLSCHAFT FUR INFORMATIK (GI)	ENGLISH	1		GESELLSCHAFT FUR INFORMATIK (GI)	ISI	A MORE USERFRIENDLY DIGITAL WALLET USER SCENARIOS OF A FUTURE WALLET	CONFERENCE PAPER	P-335	2023	KRAUß ANNA-MAGDALENA;KOSTIC SANDRA;SELLUNG RACHELLE ANN	LECT NOTES INFORMATICS (LNI), PROC - SERIES GES INFORM (GI)	none	HOCHSCHULE FÜR TECHNIK UND WIRTSCHAFT DRESDEN	HOCHSCHULE FÜR TECHNIK UND WIRTSCHAFT DRESDEN;NOTREPORTED;NOTREPORTED		KRAUß AM, 2023, LECT NOTES INFORMATICS (LNI), PROC - SERIES GES INFORM (GI)	KRAUß AM, 2023, LECT NOTES INFORMATICS (LNI), PROC - SERIES GES INFORM (GI)	GERMANY	KRAUß AM, 2023, LECT NOTES INFORMATICS (LNI),	wos
ADIANI W;APRIANINGSIH A;FACHIRA I;DEBBY T;MAHARATIE A	COMMITMENT; E-WALLET; FINANCIAL BENEFIT; MULTI-BRAND LOYALTY; SOCIAL INFLUENCE		INSTITUT TEKNOLOGI BANDUNG, SCHOOL OF BUSINESS AND MANAGEMENT, BANDUNG, INDONESIA; FACULTY OF ECONOMICS, UNIVERSITAS KATOLIK PARAHYANGAN, BANDUNG, INDONESIA	COGENT BUS. MANAG.	E-WALLET SERVICES HAVE BECOME A PREFERRED OPTION FOR DIGITAL PAYMENTS AND ARE EXPECTED TO CONTINUE GROWING GLOBALLY OVER THE NEXT FEW YEARS. A RECENT TREND SUGGESTS MILLENNIAL CONSUMERS USE MULTIPLE E-WALLET SERVICES, LEADING TO QUESTIONS ABOUT THE CONCEPT OF LOYALTY, PARTICULARLY IN THE ELECTRONIC FINANCIAL SERVICES SECTOR. THIS STUDY AIMS TO INVESTIGATE WHETHER MULTI-BRAND E-WALLET USERS HAVE L…	A. APRIANINGSIH; INSTITUT TEKNOLOGI BANDUNG, SCHOOL OF BUSINESS AND MANAGEMENT, BANDUNG, JL. GANESA 10, 40123, INDONESIA; EMAIL: ATIK.APRI@SBM-ITB.AC.ID	10.1080/23311975.2023.2290228	23311975	COGENT BUSINESS AND MANAGEMENT	ENGLISH	0	1	COGENT OA	ISI	SOCIAL INFLUENCE FINANCIAL BENEFIT AND EWALLET MULTIBRAND LOYALTY THE MEDIATING IMPACT OF COMMITMENT	ARTICLE	11	2023	ADIANI WIDYORETNO;APRIANINGSIH ATIK;FACHIRA IRA;DEBBY TERESIA;MAHARATIE ANDHINY PUSPA	COGENT BUS MANAG	none	SCHOOL OF BUSINESS AND MANAGEMENT;UNIVERSITAS KATOLIK PARAHYANGAN	NOTREPORTED;SCHOOL OF BUSINESS AND MANAGEMENT;NOTREPORTED		ADIANI W, 2023, COGENT BUS MANAG	ADIANI W, 2023, COGENT BUS MANAG	INDONESIA	ADIANI W, 2023,	wos
CHAITANYA D;SRINIVAS Y;RATNAKANTH B;LAKSHMAIAH D;ANUSHA G			ECE DEPARTMENT, VASAVI COLLEGE OF ENGINEERING, HYDERABAD, INDIA; ECE DEPARTMENT, VIGNANA BARATHI INSTITUTE OF TECHNOLOGY, HYDERABAD, INDIA; CSE DEPARTMENT, ANURAG UNIVERSITY, HYDERABAD, INDIA; ECE DEPARTMENT, SRI INDU INSTITUTE OF ENGINEERING AND TECHNOLOGY, HYDERABAD, INDIA; ECE DEPARTMENT, SRI INDU INSTITUTE OF ENGINEERING AND TECHNOLOGY, HYDERABAD, INDIA	BLOCKCHAIN TECHNOLOGY FOR IOT AND WIREL. COMMUNICATIONS	IOT DEVICES GRADUALLY GENERATE A HUGE QUANTITY OF INFORMATION AND TO ACCUMULATE THIS INFORMATION PROTECTION IS A MAIN CHALLENGE WITHIN IOT. REMOVING THIS TYPE OF PROTECTION IS GREAT FACE, AND CHAIN TECHNOLOGY IS A GREAT RESOLUTION. TO THE PROTECTION THROUGH PLAN, UNDENIABLE CLIMATE, ENCODE STYLE CHAIN TECHNOLOGY EXPLAIN TECHNICAL PROBLEMS ABOUT INTERNET OF THINGS. PRESENT TIME, NORMAL STRENGTH DE…		10.1201/9781003269991-1		BLOCKCHAIN TECHNOLOGY FOR IOT AND WIRELESS COMMUNICATIONS	ENGLISH	0		CRC PRESS	ISI	IMPROVING IOT SECURITY USING BLOCKCHAIN	BOOK CHAPTER		2023	CHAITANYA DMK;SRINIVAS YERRAM;RATNAKANTH B;LAKSHMAIAH D;ANUSHA G	BLOCKCHAIN TECHNOLOGY FOR IOT AND WIREL COMMUNICATIONS	none	VASAVI COLLEGE OF ENGINEERING;VIGNANA BARATHI INSTITUTE OF TECHNOLOGY;ANURAG UNIVERSITY;SRI INDU INSTITUTE OF ENGINEERING AND TECHNOLOGY;SRI INDU INSTITUTE OF ENGINEERING AND TECHNOLOGY	VASAVI COLLEGE OF ENGINEERING;VIGNANA BARATHI INSTITUTE OF TECHNOLOGY;ANURAG UNIVERSITY;SRI INDU INSTITUTE OF ENGINEERING AND TECHNOLOGY;SRI INDU INSTITUTE OF ENGINEERING AND TECHNOLOGY		CHAITANYA DMK, 2023, BLOCKCHAIN TECHNOLOGY FOR IOT AND WIREL COMMUNICATIONS	CHAITANYA DMK, 2023, BLOCKCHAIN TECHNOLOGY FOR IOT AND WIREL COMMUNICATIONS	INDIA	CHAITANYA DMK, 2023,	wos
ARORA S;KAUR M;JAIN E	BEHAVIOURAL INTENTION; COVID-19; E-WALLETS; PLS SEM; UTAUT 2		COMMERCE DEPARTMENT, SRI AUROBINDO COLLEGE OF COMMERCE AND MANAGEMENT, PUNJAB, LUDHIANA, INDIA	ASIAN J. BUS. RES.	THE AIM OF THE STUDY IS TO EXAMINE THE FACTORS AFFECTING ADOPTION OF E-WALLETS IN COVID ERA. UTAUT 2 MODEL WAS ADAPTED IN THE STUDY TO ANALYSE BEHAVIORAL INTENTION OF USERS TOWARDS E-WALLETS. ADDITIONALLY, IMPACT OF THREE CONSTRUCTS NAMELY, PERCEIVED RISK, TRUST AND PERCEIVED COVID THREAT ALONG WITH THE RECOGNIZED FACTORS OF UTAUT 2 MODEL WAS STUDIED ON BEHAVIORAL INTENTION OF USERS TOWARDS E-WAL…	M. KAUR; COMMERCE DEPARTMENT, SRI AUROBINDO COLLEGE OF COMMERCE AND MANAGEMENT, LUDHIANA, PUNJAB, INDIA; EMAIL: MANPREETNAUNIDH@GMAIL.COM	10.14707/ajbr.220145	24634522	ASIAN JOURNAL OF BUSINESS RESEARCH	ENGLISH	1	1	ASIA BUSINESS RESEARCH CORPORATION	ISI	EWALLET ADOPTION AMIDST COVID ERA AN EMPIRICAL INTERVENTION WITH EXTENDED UTAUT2	ARTICLE	13	2023	ARORA SARITA;KAUR MANPREET;JAIN ESHA	ASIAN J BUS RES	none	SRI AUROBINDO COLLEGE OF COMMERCE AND MANAGEMENT	NOTREPORTED;SRI AUROBINDO COLLEGE OF COMMERCE AND MANAGEMENT;NOTREPORTED		ARORA S, 2023, ASIAN J BUS RES	ARORA S, 2023, ASIAN J BUS RES	INDIA	ARORA S, 2023,	wos
DAS S	DIGITAL MEDIA; E-WALLET; ENTERTAINMENT; FINTECH; GAMING		THE HONORS PROGRAMME, SOUTHERN STAR INSTITUTE OF MANAGEMENT, DUY TAN UNIVERSITY, DA NANG, VIET NAM	DIGITAL ENTERTAINMENT AS NEXT EVOLUTION IN SERVICE SECTOR: EMERG. DIGITAL SOLUTIONS IN RESHAPING DIFFERENT INDUSTRIES	MODERN-DAY GAMING COMPANIES ARE KNOWN FOR CREATING FULLY IMMERSIVE EXPERIENCES FOR THEIR PLAYERS. THESE COMPANIES ARE KNOWN FOR THEIR INNOVATION AND CAN CREATE VARIOUS GAMES FOR DIFFERENT PLATFORMS. THIS PAPER AIMS TO REVIEW EXISTING LITERATURE AND DEVELOP A STRATEGY THAT WILL WORK FOR OTHER PLATFORMS. FINANCIAL TECHNOLOGY’S RAPID EMERGENCE AND EVOLUTION (FINTECH) HAVE SIGNIFICANTLY IMPACTED THE …	S. DAS; THE HONORS PROGRAMME, SOUTHERN STAR INSTITUTE OF MANAGEMENT, DUY TAN UNIVERSITY, DA NANG, VIET NAM; EMAIL: SUBHANKARDAS@DUYTAN.EDU.VN	10.1007/978-981-19-8121-0_11		DIGITAL ENTERTAINMENT AS NEXT EVOLUTION IN SERVICE SECTOR: EMERGING DIGITAL SOLUTIONS IN RESHAPING DIFFERENT INDUSTRIES	ENGLISH	0		SPRINGER NATURE	ISI	MODERNDAY GAMING AND THE ROLE OF FINTECH APPLICATIONS IN POPULARISING VARIOUS ENTERTAINMENT PLATFORMS ACROSS THE WORLD	BOOK CHAPTER		2023	DAS SUBHANKAR	DIGITAL ENTERTAINMENT AS NEXT EVOLUTION IN SERVICE SECTOR: EMERG DIGITAL SOLUTIONS IN RESHAPING DIFFERENT INDUSTRIES	none	DUY TAN UNIVERSITY	NOTREPORTED;DUY TAN UNIVERSITY;NOTREPORTED		DAS S, 2023, DIGITAL ENTERTAINMENT AS NEXT EVOLUTION IN SERVICE SECTOR: EMERG DIGITAL SOLUTIONS IN RESHAPING DIFFERENT INDUSTRIES	DAS S, 2023, DIGITAL ENTERTAINMENT AS NEXT EVOLUTION IN SERVICE SECTOR: EMERG DIGITAL SOLUTIONS IN RESHAPING DIFFERENT INDUSTRIES		DAS S, 2023,	wos
ANGUSAMY A;KUPPUSAMY J;BALAKRISHNAN K;XUAN T	COMPATIBILITY; E-WALLET ADOPTION; EFFORT EXPECTANCY; FACILITATING CONDITIONS; PERFORMANCE EXPECTANCY; SOCIAL INFLUENCE		FACULTY OF BUSINESS, MULTIMEDIA UNIVERSITY, JALAN AYER KEROH LAMA, MALACCA, 75450, MALAYSIA; FACULTY OF APPLIED COMMUNICATION, MULTIMEDIA UNIVERSITY, JALAN AYER KEROH LAMA, MALACCA, 75450, MALAYSIA	J. INF. TECHNOL. MANAG.	THE RAPID GROWTH AND ADVANCEMENT OF ELECTRONIC DEVICES AND TECHNOLOGIES IN THE FINTECH INDUSTRY EMPOWER NEW INNOVATIVE PRODUCTS AND SERVICES. THE COVID-19 PANDEMIC COULD HAVE A DEVASTATING EFFECT ON MALAYSIA'S ECONOMY, BUT IT HAS OFFERED ADDITIONAL OPPORTUNITIES FOR THE E-WALLET SEGMENT OF THE FINTECH BUSINESS TO THRIVE. THE E-WALLET SEGMENT OF FINTECH IS ONE OF THE LATEST INNOVATIONS THAT IS CUR…	K. BALAKRISHNAN; FACULTY OF APPLIED COMMUNICATION, MULTIMEDIA UNIVERSITY, MALACCA, JALAN AYER KEROH LAMA, 75450, MALAYSIA; EMAIL: KAVITHA.BALAKRISHNAN@MMU.EDU.MY	10.22059/JITM.2022.339971.3036	20085893	JOURNAL OF INFORMATION TECHNOLOGY MANAGEMENT	ENGLISH	1	2	UNIVERSITY OF TEHRAN	ISI	EFFECTS OF THE PANDEMIC ON THE ADOPTION OF EWALLETS AMONG YOUNG ADULTS IN MALAYSIA	ARTICLE	15	2023	ANGUSAMY AJITHA;KUPPUSAMY JAYANTY;BALAKRISHNAN KAVITHA;XUAN TAI KE	J INF TECHNOL MANAG	none	MULTIMEDIA UNIVERSITY;MULTIMEDIA UNIVERSITY	NOTREPORTED;MULTIMEDIA UNIVERSITY;NOTREPORTED		ANGUSAMY A, 2023, J INF TECHNOL MANAG	ANGUSAMY A, 2023, J INF TECHNOL MANAG	MALAYSIA	ANGUSAMY A, 2023,	wos
LIM W;MUNIKRISHNAN U;LEONG C;HIEW L;LEONG M;YANG L	CONTINUANCE INTENTION; E-WALLET USAGE; NCA; PERCEIVED RISK; PERCEIVED SECURITY	LEAST SQUARES APPROXIMATIONS; NETWORK SECURITY; CONDITION; CONDITION ANALYSIS; CONTINUANCE INTENTIONS; E-WALLET USAGE; MALAYSIA; NECESSARY CONDITION ANALYSE; PERCEIVED EASE-OF-USE; PERCEIVED RISK; PERCEIVED SECURITIES; PERCEIVED USEFULNESS; RISK MANAGEMENT	GRADUATE BUSINESS SCHOOL, UCSI UNIVERSITY, KUALA LUMPUR, MALAYSIA; FACULTY OF BUSINESS AND MANAGEMENT, UCSI UNIVERSITY, KUALA LUMPUR, MALAYSIA; GRADUATE BUSINESS SCHOOL, UCSI UNIVERSITY, KUALA LUMPUR CAMPUS, KUALA LUMPUR, MALAYSIA; FACULTY OF BUSINESS AND MANAGEMENT, UCSI UNIVERSITY, SARAWAK CAMPUS, KUCHING, MALAYSIA; FACULTY OF BUSINESS AND MANAGEMENT, UCSI UNIVERSITY, KUALA LUMPUR CAMPUS, KUALA…	INF. COMPUT. SECURITY	PURPOSE: THIS STUDY AIMS TO EXPLORE E-WALLET CONTINUANCE INTENTION IN MALAYSIA USING PERCEIVED USEFULNESS (PU), PERCEIVED EASE OF USE (PEU), PERCEIVED RISK (PR) AND PERCEIVED SECURITY (PS). ADDITIONAL EMPHASIS IS PLACED ON THE DEGREE OF NECESSITY OF RISK AND SECURITY CONDITIONS DRIVING THE CONTINUANCE INTENTION TO USE E-WALLETS. DESIGN/METHODOLOGY/APPROACH: THIS QUANTITATIVE STUDY USED A SAMPLE O…	W. LIM; GRADUATE BUSINESS SCHOOL, UCSI UNIVERSITY, KUALA LUMPUR, MALAYSIA; EMAIL: EVALIM@UCSIUNIVERSITY.EDU.MY	10.1108/ICS-05-2023-0085	20564961	INFORMATION AND COMPUTER SECURITY	ENGLISH	0		EMERALD PUBLISHING	ISI	DO YOU WANT A SECURE EWALLET UNDERSTANDING THE ROLE OF RISK AND SECURITY IN EWALLET CONTINUANCE INTENTION	ARTICLE		2023	LIM WEILEE;MUNIKRISHNAN UMA THEVI;LEONG CHOI-MENG;HIEW LEE-CHEA;LEONG MEI-WEI;YANG LIU	INF COMPUT SECURITY	none	UCSI UNIVERSITY;UCSI UNIVERSITY;UCSI UNIVERSITY;UCSI UNIVERSITY;UCSI UNIVERSITY	NOTREPORTED;UCSI UNIVERSITY;EMAIL: EVALIM@UCSIUNIVERSITY.EDU.MY		LIM WL, 2023, INF COMPUT SECURITY	LIM WL, 2023, INF COMPUT SECURITY	MALAYSIA	LIM WL, 2023,	wos
MASAMILA B;OREKU G;NFUKA E			THE OPEN UNIVERSITY OF TANZANIA, TANZANIA	IMPACT OF DISRUPTIVE TECHNOLOGIES ON THE SOCIO-ECONOMIC DEVELOPMENT OF EMERG. CTRIES.	INNOVATIVE DIGITAL PAYMENT SYSTEMS (DPS) ARE A CRUCIAL SOLUTION FOR GREATER FINANCIAL INCLUSION ASSISTING LOW-INCOME HOUSEHOLDS IN OVERCOMING POVERTY USING LOWER-COST METHODS FOR MANAGING THEIR FINANCES. THE ADVANCEMENT IN INTERNET COMMUNICATION TECHNOLOGIES AND THE ARRIVAL OF E-COMMERCE AND E-BUSINESS SIMULATED DIGITAL PAYMENT SYSTEMS PROVIDESVARIOUS ELECTRONIC PAYMENT OPTIONS SUCH AS PAYMENT CA…		10.4018/978-1-6684-6873-9.ch005		IMPACT OF DISRUPTIVE TECHNOLOGIES ON THE SOCIO-ECONOMIC DEVELOPMENT OF EMERGING COUNTRIES	ENGLISH	0		IGI GLOBAL	ISI	DIGITAL PAYMENTS SYSTEMS FOR EMERGING ECONOMIES CASE OF TANZANIA	BOOK CHAPTER		2023	MASAMILA BOSSI A;OREKU GEORGE S;NFUKA EDEPHONCE N	IMPACT OF DISRUPTIVE TECHNOLOGIES ON THE SOCIO-ECONOMIC DEVELOPMENT OF EMERG CTRIES	none	THE OPEN UNIVERSITY OF TANZANIA	THE OPEN UNIVERSITY OF TANZANIA		MASAMILA BA, 2023, IMPACT OF DISRUPTIVE TECHNOLOGIES ON THE SOCIO-ECONOMIC DEVELOPMENT OF EMERG CTRIES	MASAMILA BA, 2023, IMPACT OF DISRUPTIVE TECHNOLOGIES ON THE SOCIO-ECONOMIC DEVELOPMENT OF EMERG CTRIES	TANZANIA	MASAMILA BA, 2023,	wos
GUPTA S;DHINGRA S;TANWAR S;AGGARWAL R		BEHAVIORAL INTENTION; COMPREHENSIVE MODELING; FINANCIAL SERVICE; INTENTION TO USE; MOBILE PAYMENT; PERCEIVED TRUSTS; PRICE VALUES; SPORADICS; TASK TECHNOLOGY FIT; TRUST VALUES; ECONOMIC AND SOCIAL EFFECTS	UNIVERSITY SCHOOL OF MANAGEMENT STUDIES, GURU GOBIND SINGH INDRAPRASTHA UNIVERSITY, NEW DELHI, INDIA; DEPARTMENT OF COMMERCE, CENTRAL UNIVERSITY OF RAJASTHAN, RAJASTHAN, INDIA	INT. J. HUM.-COMPUT. INTERACT.	THE EXTANT LITERATURE ON MOBILE FINANCIAL SERVICES INDICATES THAT THE WORK ON MERCHANTS’ ADOPTION OF MOBILE WALLETS IS SPORADIC AND UNDER-RESEARCHED. TAKING INTO ACCOUNT THE CRITICAL ROLE OF MERCHANTS IN THE MOBILE PAYMENT ECOSYSTEM, THIS STUDY INTENDS TO STUDY THE FACTORS THAT IMPACT MERCHANTS’ INTENTION TO ADOPT MOBILE WALLETS. A COMPREHENSIVE MODEL COMBINING THE UTAUT MODEL, TTF MODEL, PERCEIV…	S. GUPTA; UNIVERSITY SCHOOL OF MANAGEMENT STUDIES, GURU GOBIND SINGH INDRAPRASTHA UNIVERSITY, NEW DELHI, INDIA; EMAIL: SINGLASHELLY1502@GMAIL.COM	10.1080/10447318.2022.2104408	10447318	INTERNATIONAL JOURNAL OF HUMAN-COMPUTER INTERACTION	ENGLISH	8	19	TAYLOR AND FRANCIS LTD.	ISI	WHAT EXPLAINS THE ADOPTION OF MOBILE WALLETS A STUDY FROM MERCHANTS PERSPECTIVES	ARTICLE	39	2023	GUPTA SHELLY;DHINGRA SANJAY;TANWAR SANTROOP;AGGARWAL RADHIKA	INT J HUM-COMPUT INTERACT	none	UNIVERSITY SCHOOL OF MANAGEMENT STUDIES;CENTRAL UNIVERSITY OF RAJASTHAN	NOTREPORTED;UNIVERSITY SCHOOL OF MANAGEMENT STUDIES;NOTREPORTED		GUPTA S, 2023, INT J HUM-COMPUT INTERACT	GUPTA S, 2023, INT J HUM-COMPUT INTERACT	INDIA	GUPTA S, 2023,	wos
POOJA L;MADHURI J	ECDSA; RING STRUCTURE; SMART CONTRACT	BLOCKCHAIN; DISTRIBUTED LEDGER; NETWORK SECURITY; AUTOMATIC PAYMENTS; BLOCK-CHAIN; COLLECTION SYSTEMS; DECENTRALISED; ECDSA; MULTIPLE USER; RINGS STRUCTURE; SERVICE PROVIDER; TRANSLUCENTS; USER PRIVACY; SMART CONTRACT	DEPARTMENT OF COMPUTER SCIENCE AND ENGINEERING, BANGALORE INSTITUTE OF TECHNOLOGY, BANGALORE, INDIA	LECT. NOTES NETWORKS SYST.	ELECTRONIC INVOICES ARE GENERATED USING BLOCKCHAIN TECHNOLOGY. ADDITIONALLY, IT HAS THE POTENTIAL TO FUNDAMENTALLY ALTER HOW INVOICES ARE PRODUCED, TRANSACTIONS ARE VALIDATED, AND PAYMENTS ARE EXECUTED. THESE DISTRIBUTED LEDGERS CONTINUE TO BE THE MOST WELL KNOWN AND ARE REGARDED AS THE CORNERSTONE OF CRYPTOCURRENCIES. THEY ARE COMPOSED OF BLOCKS, AND EACH BLOCK CONTAINS A TRANSACTIONAL RECORD. O…	L. POOJA; DEPARTMENT OF COMPUTER SCIENCE AND ENGINEERING, BANGALORE INSTITUTE OF TECHNOLOGY, BANGALORE, INDIA; EMAIL: POOJA.LOKESH4@GMAIL.COM	10.1007/978-981-19-9304-6_3	23673370	LECTURE NOTES IN NETWORKS AND SYSTEMS	ENGLISH	1		SPRINGER SCIENCE AND BUSINESS MEDIA DEUTSCHLAND GMBH	ISI	PRIVACY PRESERVED EFFECTIVE BILL COLLECTION SYSTEM USING BLOCKCHAIN	CONFERENCE PAPER	615 LNNS	2023	POOJA L;MADHURI J	LECT NOTES NETWORKS SYST	none	BANGALORE INSTITUTE OF TECHNOLOGY	NOTREPORTED;BANGALORE INSTITUTE OF TECHNOLOGY;NOTREPORTED		POOJA L, 2023, LECT NOTES NETWORKS SYST	POOJA L, 2023, LECT NOTES NETWORKS SYST	INDIA	POOJA L, 2023,	wos
SANTOSO M;SUZIANTI A	DIGITAL WALLET; MSMES; PLS-SEM; TECHNOLOGY ACCEPTANCE MODEL; TECHNOLOGY ADOPTION		UNIVERSITAS INDONESIA, INDONESIA	PROC. INT. CONF. RES. EDUC. SCI.	SINCE THE PANDEMIC HITS, WE NEED TO ADJUST SPECIFIC WAYS TO PREVENT THE SPREAD OF COVID-19, PRIMARILY DUE TO THE ENFORCEMENT OF SOCIAL DISTANCING. IN INDONESIA, HOW WE PURCHASE THINGS HAS CHANGED SIGNIFICANTLY, LEADING TO THE GROWTH OF DIGITAL WALLET USAGE IN THE ONLINE AND OFFLINE SECTORS. THIS PHENOMENON ALIGNS WITH THE GOVERNMENT POLICY AND THE OBJECTIVE OF PURSUING A CASHLESS SOCIETY AND BRIN…			28336747	PROCEEDINGS OF INTERNATIONAL CONFERENCE ON RESEARCH IN EDUCATION AND SCIENCE	ENGLISH	0	1	THE INTERNATIONAL SOCIETY FOR TECHNOLOGY EDUCATION AND SCIENCE	ISI	FACTOR ANALYSIS OF INTENTION TO USE DIGITAL WALLET BY MSMES IN FB SECTOR	CONFERENCE PAPER	9	2023	SANTOSO MUHAMAD IMAN;SUZIANTI AMALIA	PROC INT CONF RES EDUC SCI	none	UNIVERSITAS INDONESIA	UNIVERSITAS INDONESIA		SANTOSO MI, 2023, PROC INT CONF RES EDUC SCI	SANTOSO MI, 2023, PROC INT CONF RES EDUC SCI	INDONESIA	SANTOSO MI, 2023,	wos
JAYASINGH B;SRI G	CREDIT CARD; DATA MINING; FRAUD DETECTION; FRAUDULENT TRANSACTIONS; TRANSACTION ANOMALY; XGB CLASSIFIER	ANOMALY DETECTION; CLASSIFICATION (OF INFORMATION); E-LEARNING; LEARNING ALGORITHMS; MACHINE LEARNING; ANOMALY DETECTION MODELS; CREDIT CARDS; DEBIT CARDS; FRAUD DETECTION; FRAUDULENT TRANSACTIONS; LEARNING CLASSIFIERS; MACHINE-LEARNING; ONLINE TRANSACTION; TRANSACTION ANOMALY; XGB CLASSIFIER; DATA MINING	CVR COLLEGE OF ENGINEERING, IT DEPARTMENT, HYDERABAD, INDIA	INT. CONF. EMERG. SMART COMPUT. INFORMATICS, ESCI	THE METHODS FOR PAYMENT OF AN ONLINE TRANSACTION ARE CREDIT OR DEBIT CARD, ONLINE BANK TRANSFER, E-WALLETS, MOBILE PAYMENTS, ETC. THE PROCESS OF ELECTRONIC FUND TRANSFER IS SECURE, AND PASSWORD PROTECTED, AS CLAIMED BY THE VENDORS. THE SECURITY THREATS FOR ALL PAYMENT METHODS EXIST WITH AN INTENTION, LIKE CREDIT AND DEBIT CARD FRAUDS. MONITORING FRAUDULENT ACTIVITIES BECOMES MORE IMPORTANT AS THE…	B.B. JAYASINGH; CVR COLLEGE OF ENGINEERING, IT DEPARTMENT, HYDERABAD, INDIA; EMAIL: BIPINBJAYASINGH@CVR.AC.IN	10.1109/ESCI56872.2023.10100152		2023 INTERNATIONAL CONFERENCE ON EMERGING SMART COMPUTING AND INFORMATICS, ESCI 2023	ENGLISH	2		INSTITUTE OF ELECTRICAL AND ELECTRONICS ENGINEERS INC.	ISI	ONLINE TRANSACTION ANOMALY DETECTION MODEL FOR CREDIT CARD USAGE USING MACHINE LEARNING CLASSIFIERS	CONFERENCE PAPER		2023	JAYASINGH BIPIN BIHARI;SRI G BHAGYA	INT CONF EMERG SMART COMPUT INFORMATICS, ESCI	none	CVR COLLEGE OF ENGINEERING	NOTREPORTED;CVR COLLEGE OF ENGINEERING;NOTREPORTED		JAYASINGH BB, 2023, INT CONF EMERG SMART COMPUT INFORMATICS, ESCI	JAYASINGH BB, 2023, INT CONF EMERG SMART COMPUT INFORMATICS, ESCI	INDIA	JAYASINGH BB, 2023, INT CONF EMERG SMART COMPUT INFORMATICS,	wos
ROHMALIA N;BASKARA N I	BLOCKCHAIN; CBDC; HYPERLEDGER FABRIC	BLOCKCHAIN; DISTRIBUTED LEDGER; SALES; BANK ACCOUNTS; BANK INSTITUTION; BANKING INSTITUTIONS; BLOCK-CHAIN; CENTRAL BANK; CENTRAL BANK DIGITAL CURRENCY; DEBIT CARDS; DIGITAL WALLETS; HYPERLEDG FABRIC; PAYMENT SYSTEMS; ELECTRONIC MONEY	SCHOOL OF ELECTRICAL ENGINEERING AND INFORMATICS INSTITUT TEKNOLOGI BANDUNG, BANDUNG, INDONESIA	INT. CONF. ICT FOR SMART SOC., ICISS - PROCEEDING	CURRENCY IS THE VALUE OF A CURRENCY ESTABLISHED AS A VALID MEANS OF PAYMENT IN A COUNTRY. THE DEVELOPMENT OF DIGITALIZATION HAS MADE PEOPLE ACCUSTOMED TO DOING DIGITAL TRANSACTIONS BY KEEPING PHYSICAL MONEY IN BANK ACCOUNTS AND DIGITAL WALLETS. THIS, MAKES BANKING INSTITUTIONS AND NON-BANK INSTITUTIONS RACE FOR PAYMENT SYSTEMS, DEBIT CARDS, DIGITAL WALLETS, AND DIGITAL MONEY. CASH USAGE IS DECLIN…		10.1109/ICISS59129.2023.10291775		10TH INTERNATIONAL CONFERENCE ON ICT FOR SMART SOCIETY, ICISS 2023 - PROCEEDING	ENGLISH	0		INSTITUTE OF ELECTRICAL AND ELECTRONICS ENGINEERS INC.	ISI	DESIGNING A CENTRAL BANK DIGITAL CURRENCY CBDC RETAIL MODEL AS A PAYMENT SYSTEM	CONFERENCE PAPER		2023	ROHMALIA NIMA;BASKARA NUGRAHA I GUSTI BAGUS	INT CONF ICT FOR SMART SOC, ICISS - PROCEEDING	none	SCHOOL OF ELECTRICAL ENGINEERING AND INFORMATICS INSTITUT TEKNOLOGI BANDUNG	SCHOOL OF ELECTRICAL ENGINEERING AND INFORMATICS INSTITUT TEKNOLOGI BANDUNG		ROHMALIA N, 2023, INT CONF ICT FOR SMART SOC, ICISS - PROCEEDING	ROHMALIA N, 2023, INT CONF ICT FOR SMART SOC, ICISS - PROCEEDING	INDONESIA	ROHMALIA N, 2023, INT CONF ICT FOR SMART SOC,	wos
BHATIA-KALLURI A;CARAWAY B	DIGITAL WALLET; FINANCIAL INCLUSION; MULTI-SIDED MARKET; NETWORK EFFECTS; PLATFORMS		FACULTY OF INFORMATION, UNIVERSITY OF TORONTO, CANADA; INSTITUTE OF COMMUNICATION, CULTURE, INFORMATION & TECHNOLOGY, UNIVERSITY OF TORONTO, CANADA	SOC. INCL.	PAYTM IS A PAYMENT APP IN INDIA PROVIDING E-WALLET SERVICES; IT IS ALSO THE MOST PROMINENT MOBILE E-COMMERCE APP IN THE WORLD’S THIRD-LARGEST ECONOMY. THIS ARTICLE USES PAYTM AS A CASE STUDY TO BETTER UNDERSTAND THE GLOBAL PLATFORM ECONOMY AND ITS IMPLICATIONS FOR SOCIAL AND ECONOMIC INEQUITIES. WE CONTEXTUALIZE THE EMERGENCE OF PAYTM BY DRAWING ATTENTION TO ITS RELATIONSHIP WITH INDIA’S DEVELOPI…	A. BHATIA-KALLURI; FACULTY OF INFORMATION, UNIVERSITY OF TORONTO, CANADA; EMAIL: ADITI.BHATIA@MAIL.UTORONTO.CA	10.17645/si.v11i3.6687	21832803	SOCIAL INCLUSION	ENGLISH	1	3	COGITATIO PRESS	ISI	TRANSFORMATION OF THE DIGITAL PAYMENT ECOSYSTEM IN INDIA A CASE STUDY OF PAYTM	ARTICLE	11	2023	BHATIA-KALLURI ADITI;CARAWAY BRETT R	SOC INCL	none	UNIVERSITY OF TORONTO;UNIVERSITY OF TORONTO	NOTREPORTED;UNIVERSITY OF TORONTO;NOTREPORTED		BHATIA-KALLURI A, 2023, SOC INCL	BHATIA-KALLURI A, 2023, SOC INCL	CANADA	BHATIA-KALLURI A, 2023,	wos
AL-HATTAMI H;AL-ADWAN A;ABDULLAH A;AL-HAKIMI M			DEPARTMENT OF ACCOUNTING, FACULTY OF COMMERCE AND ECONOMIC, HODEIDAH UNIVERSITY, YEMEN; DEPARTMENT OF BUSINESS TECHNOLOGY, AL-AHLIYYA AMMAN UNIVERSITY, AMMAN, JORDAN; HOURANI CENTER FOR APPLIED SCIENTIFIC RESEARCH, AL-AHLIYYA AMMAN UNIVERSITY, AMMAN, JORDAN; DEPARTMENT OF ACCOUNTING, COLLEGE OF BUSINESS ADMINISTRATION, PRINCE SATTAM BIN ABDULAZIZ UNIVERSITY, AL KHARJ, SAUDI ARABIA; DEPARTMENT OF …	HUM. BEHAV. EMERG. TECHNOL.	ONE OF THE HIGHLY ACCLAIMED INNOVATIONS IS THE MOBILE WALLET. MOBILE WALLETS ENSURE THAT CUSTOMERS CAN MAKE PURCHASES EVEN IF THEY FORGET THEIR WALLETS AT HOME. THE USE OF THESE WALLETS HAS INCREASED SIGNIFICANTLY WITH THE SPREAD OF THE COVID-19 PANDEMIC AS A PREVENTIVE MEASURE. HOWEVER, WITH COVID-19 RESTRICTIONS LIFTED AND ADAPTATION TO THE PANDEMIC, CUSTOMERS ARE NO LONGER FORCED TO USE MOBILE…	H.M. AL-HATTAMI; DEPARTMENT OF ACCOUNTING, FACULTY OF COMMERCE AND ECONOMIC, HODEIDAH UNIVERSITY, YEMEN; EMAIL: HATTAMIHAMOOD@GMAIL.COM	10.1155/2023/9984246	25781863	HUMAN BEHAVIOR AND EMERGING TECHNOLOGIES	ENGLISH	3		WILEY-HINDAWI	ISI	DETERMINANTS OF CUSTOMER LOYALTY TOWARD MOBILE WALLET SERVICES IN POSTCOVID19 THE MODERATING ROLE OF TRUST	ARTICLE	2023	2023	AL-HATTAMI HAMOOD MOHAMMED;AL-ADWAN AHMAD SAMED;ABDULLAH ABDULWAHID AHMED HASHED;AL-HAKIMI MOHAMMED A	HUM BEHAV EMERG TECHNOL	none	HODEIDAH UNIVERSITY;AL-AHLIYYA AMMAN UNIVERSITY;AL-AHLIYYA AMMAN UNIVERSITY;PRINCE SATTAM BIN ABDULAZIZ UNIVERSITY;THAMAR UNIVERSITY	NOTREPORTED;HODEIDAH UNIVERSITY;NOTREPORTED		AL-HATTAMI HM, 2023, HUM BEHAV EMERG TECHNOL	AL-HATTAMI HM, 2023, HUM BEHAV EMERG TECHNOL	YEMEN	AL-HATTAMI HM, 2023,	wos
BAU Y;LEONG T;GOH C	CUSTOMER REVIEWS; E-WALLET COMPANIES; RATING ACCURACY EVALUATION; SENTIMENT ANALYSIS		MULTIMEDIA UNIVERSITY, PERSIARAN MULTIMEDIA, CYBERJAYA, 63100, MALAYSIA	J. LOGIST. INFORM. SERV. SCI.	THIS SENTIMENT ANALYSIS RESEARCH REPORTS A SYSTEMATIC STUDY OF CUSTOMER REVIEWS OF UNSTRUCTURED DATA FOR SEVEN POPULAR E-WALLET COMPANIES, INCLUDING ALIPAY, GOOGLE WALLET, GRAB SUPERAPP, PAYPAL, SAMSUNG WALLET, SHOPEE MY, AND TOUCH 'N GO EWALLET. PREVIOUSLY, COMPANIES FACED CHALLENGES IN EFFECTIVELY UTILIZING CUSTOMER REVIEWS TO UNDERSTAND AND ASSESS CUSTOMER SENTIMENT TOWARD THEIR PRODUCTS OR SE…	T.E. LEONG; MULTIMEDIA UNIVERSITY, PERSIARAN MULTIMEDIA, CYBERJAYA, 63100, MALAYSIA; EMAIL: KELVIN.TEE168@GMAIL.COM	10.33168/JLISS.2023.0413	24092665	JOURNAL OF LOGISTICS, INFORMATICS AND SERVICE SCIENCE	ENGLISH	0	4	SUCCESS CULTURE PRESS	ISI	SENTIMENT ANALYSIS OF EWALLET COMPANIES EXPLORING CUSTOMER RATINGS AND PERCEPTIONS	ARTICLE	10	2023	BAU YOON-TECK;LEONG TEE ENG;GOH CHIEN-LE	J LOGIST INFORM SERV SCI	none	MULTIMEDIA UNIVERSITY	NOTREPORTED;MULTIMEDIA UNIVERSITY;NOTREPORTED		BAU YT, 2023, J LOGIST INFORM SERV SCI	BAU YT, 2023, J LOGIST INFORM SERV SCI	MALAYSIA	BAU YT, 2023,	wos
DHAIGUDE A;VINOD T A;SHAMEEM J M;KAMATH G	INTERNET COMMERCE; LOYALTY; MOBILE WALLET; ONLINE PAYMENT; PERCEIVED VALUE; SATISFACTION; SERIAL MEDIATION; TRUST		DEPARTMENT OF OPERATIONS & SUPPLY CHAIN MANAGEMENT AND QUANTITATIVE METHODS, S. P. JAIN INSTITUTE OF MANAGEMENT AND RESEARCH, MUMBAI, INDIA; DEPARTMENT OF MARKETING, INDIAN INSTITUTE OF MANAGEMENT ROHTAK, HARYANA, ROHTAK, INDIA; DEPARTMENT OF FINANCE & ACCOUNTING, INDIAN INSTITUTE OF MANAGEMENT VISAKHAPATNAM, VISAKHAPATNAM, INDIA; DEPARTMENT OF HUMANITIES AND MANAGEMENT, MANIPAL INSTITUTE OF TECH…	COGENT BUS. MANAG.	THIS STUDY EXPLORES THE ROLE OF PERCEIVED CUSTOMER VALUE AND LOYALTY RELATIONSHIPS IN MOBILE WALLET (M-WALLET). THE STUDY FURTHER INVESTIGATES TRUST AND SATISFACTION AS DRIVERS OF LOYALTY AND EXAMINES THE ROLE OF TRUST IN THE TRADITIONAL VALUE-SATISFACTION-LOYALTY RELATIONSHIP. A TOTAL OF 214 RESPONSES FROM M-WALLET USERS WERE CAPTURED USING A STRUCTURED QUESTIONNAIRE IN A CROSS-SECTIONAL SURVEY …	G.B. KAMATH; DEPARTMENT OF HUMANITIES AND MANAGEMENT, MANIPAL INSTITUTE OF TECHNOLOGY, MANIPAL ACADEMY OF HIGHER EDUCATION, MANIPAL, 576104, INDIA; EMAIL: GIRIDHAR.KAMATH@MANIPAL.EDU	10.1080/23311975.2023.2281050	23311975	COGENT BUSINESS AND MANAGEMENT	ENGLISH	0	3	COGENT OA	ISI	IS PERCEIVED VALUE ENOUGH TO CREATE LOYALTY FOR MWALLETS EXPLORING THE ROLE OF TRUST AND SATISFACTION	ARTICLE	10	2023	DHAIGUDE AMOL S;VINOD TAPAR ARCHIT;SHAMEEM JAWED MOHAMMAD;KAMATH GIRIDHAR B	COGENT BUS MANAG	none	S. P. JAIN INSTITUTE OF MANAGEMENT AND RESEARCH;INDIAN INSTITUTE OF MANAGEMENT ROHTAK;INDIAN INSTITUTE OF MANAGEMENT VISAKHAPATNAM;MANIPAL INSTITUTE OF TECHNOLOGY	NOTREPORTED;MANIPAL INSTITUTE OF TECHNOLOGY;NOTREPORTED		DHAIGUDE AS, 2023, COGENT BUS MANAG	DHAIGUDE AS, 2023, COGENT BUS MANAG	INDIA	DHAIGUDE AS, 2023,	wos
HOLE Y;HOLE S;LEONARDO C L;NAIR B;HASYIM M;BAPAT H	BESHMT; BLOCK-CHAIN; DLET; SECURITY; TOURISM	BLOCKCHAIN; DISTRIBUTED LEDGER; INVESTMENTS; PERSONAL COMPUTING; TOURISM; BLOCK-CHAIN; BLOCK-CHAIN ENABLED SMART HOSPITALITY MANAGEMENT AND TOURISM; CENTRALISED; CLOUD SERVERS; DECENTRALIZED APPROACH; DEEP-LEARNING ENABLED BY TOURISM; ECONOMIC DATA; SECURITY; TRUST AND REPUTATION MANAGEMENTS; DEEP LEARNING	S.N.G INSTITUTE OF MANAGEMENT AND RESEARCH, PUNE, INDIA; UNIVERSITY OF FOGGIA, DEPARTMENT OF ECONOMICS, FOGGIA, ITALY; MG UNIVERSITY, D B COLLEGE, DEPARTMENT OF TOURISM, KERALA, KOTTAYAM, INDIA; HASANUDDIN UNIVERSITY, INDONESIA; IIST GROUP OF INSTITUTIONS, INDORE, INDIA	INT. CONF. ADV. COMPUT. INNOV. TECHNOL. ENG., ICACITE	THE BULK OF DIGITAL PAYMENTS IN THE ERA OF INDUSTRY 4.0 ARE DONE THROUGH PROGRAMMES THAT ARE SUPPORTED BY GATEWAYS OF DIFFERENT PAYMENTS. THANKS TO THESE DIVERSE PAYMENT CHANNELS, ATTACKERS CAN ENGAGE IN DESTRUCTIVE ACTIVITIES INCLUDING HACKING INTO E-WALLET ACCOUNTS, AND ASSAULTS ON PAYMENT CLEARANCE CYCLES. FOR TOURISM, ECONOMIC DATA IS KEPT ON A CENTRALISED CLOUD SERVER, WHICH MIGHT LEAD TO PA…		10.1109/ICACITE57410.2023.10183291		2023 3RD INTERNATIONAL CONFERENCE ON ADVANCE COMPUTING AND INNOVATIVE TECHNOLOGIES IN ENGINEERING, ICACITE 2023	ENGLISH	0		INSTITUTE OF ELECTRICAL AND ELECTRONICS ENGINEERS INC.	ISI	BLOCKCHAIN USAGES IN HOSPITALITY MANAGEMENT	CONFERENCE PAPER		2023	HOLE YOGESH;HOLE SNEHAL;LEONARDO CAVALIERE LUIGI PIO;NAIR BINDU;HASYIM MUHAMMAD;BAPAT HARISH B	INT CONF ADV COMPUT INNOV TECHNOL ENG, ICACITE	none	S.N.G INSTITUTE OF MANAGEMENT AND RESEARCH;UNIVERSITY OF FOGGIA;MG UNIVERSITY;HASANUDDIN UNIVERSITY;IIST GROUP OF INSTITUTIONS	S.N.G INSTITUTE OF MANAGEMENT AND RESEARCH;UNIVERSITY OF FOGGIA;MG UNIVERSITY;HASANUDDIN UNIVERSITY;IIST GROUP OF INSTITUTIONS		HOLE Y, 2023, INT CONF ADV COMPUT INNOV TECHNOL ENG, ICACITE	HOLE Y, 2023, INT CONF ADV COMPUT INNOV TECHNOL ENG, ICACITE	INDIA	HOLE Y, 2023, INT CONF ADV COMPUT INNOV TECHNOL ENG,	wos
NA N				IFIP ADVANCES IN INFORMATION AND COMMUNICATION TECHNOLOGY	THE PROCEEDINGS CONTAIN 15 PAPERS. THE SPECIAL FOCUS IN THIS CONFERENCE IS ON PRIVACY AND IDENTITY MANAGEMENT. THE TOPICS INCLUDE: PRIVACY AND DATA PROTECTION IN THE ERA OF RECOMMENDATION SYSTEMS: A POSTPHENOMENOLOGICAL APPROACH; THE DMA AND THE GDPR: MAKING SENSE OF DATA ACCUMULATION, CROSS-USE AND DATA SHARING PROVISIONS; TOWARDS ASSESSING FEATURES OF DARK PATTERNS IN COOKIE CONSENT PROCESSES; …			18684238	IFIP ADVANCES IN INFORMATION AND COMMUNICATION TECHNOLOGY	ENGLISH	0		SPRINGER SCIENCE AND BUSINESS MEDIA DEUTSCHLAND GMBH	ISI	17TH IFIP WG 92 96117 116SIG 922 INTERNATIONAL SUMMER SCHOOL ON PRIVACY AND IDENTITY MANAGEMENT PRIVACY AND IDENTITY 2022	CONFERENCE REVIEW	671 IFIP	2023		IFIP ADVANCES IN INFORMATION AND COMMUNICATION TECHNOLOGY	none		NOTREPORTED		NA NA, 2023, IFIP ADVANCES IN INFORMATION AND COMMUNICATION TECHNOLOGY	NA NA, 2023, IFIP ADVANCES IN INFORMATION AND COMMUNICATION TECHNOLOGY		NA NA, 2023,	wos
GHANI A;NGAH A;YAAKOP A	ATTACHMENT; CASHLESS SOCIETY; CONTINUANCE INTENTION TO USE; E-WALLET; MALAYSIA; MOBILE WALLET; SATISFACTION; SELF-CONGRUITY; SOR THEORY		UNIVERSITY MALAYSIA TERENGGANU, 21300 KUALA NERUS, TERENGGANU, MALAYSIA	LECT. NOTES NETWORKS SYST.	RESEARCH ON E-WALLET BEHAVIOUR HAS CAPTURED THE INTEREST OF SCHOLARS IN RECENT YEARS AS A RESULT OF THE RAPID CHANGES IN SPENDING PATTERNS. THIS STUDY AIMS TO INVESTIGATE E-WALLET USERS’ CONTINUANCE USAGE INTENTION BY INCORPORATING SOR THEORY. THIS STUDY ILLUSTRATES THE MEDIATING ROLE OF SATISFACTION AND ATTACHMENT IN THE RELATIONSHIP BETWEEN SELF-CONGRUITY AND CONTINUANCE INTENTION TO USE E-WALL…	A.W.A. GHANI; UNIVERSITY MALAYSIA TERENGGANU, TERENGGANU, 21300 KUALA NERUS, MALAYSIA; EMAIL: AZNIDAAGHANI@GMAIL.COM	10.1007/978-3-031-16865-9_1	23673370	LECTURE NOTES IN NETWORKS AND SYSTEMS	ENGLISH	0		SPRINGER SCIENCE AND BUSINESS MEDIA DEUTSCHLAND GMBH	ISI	WHY SHOULD I CONTINUE USING IT FACTORS INFLUENCING CONTINUANCE INTENTION TO USE EWALLET THE SOR FRAMEWORK	CONFERENCE PAPER	550 LNNS	2023	GHANI AZNIDA WATI ABDUL;NGAH ABDUL HAFAZ;YAAKOP AZIZUL YADI	LECT NOTES NETWORKS SYST	none	UNIVERSITY MALAYSIA TERENGGANU	NOTREPORTED;UNIVERSITY MALAYSIA TERENGGANU;NOTREPORTED		GHANI AWA, 2023, LECT NOTES NETWORKS SYST	GHANI AWA, 2023, LECT NOTES NETWORKS SYST	MALAYSIA	GHANI AWA, 2023,	wos
KURNIAWAN A;IMAM R;ZHALIFUNNAS R;PUTRA A;GAOL F;MATSUO T	BEHAVIOR; E-MONEY; E-WALLET; PANDEMIC; TRANSACTIONS	BEHAVIOR; CASH TRANSACTION; DIRECT CONTACT; E-WALLET; INDONESIA; PANDEMIC; PUBLIC PLACES; QUANTITATIVE METHOD; RESEARCH STUDIES; TRANSACTION; ELECTRONIC MONEY	SCHOOL OF INFORMATION SYSTEM, BINA NUSANTARA UNIVERSITY, ALAM SUTERA, JAKARTA, INDONESIA; BINUS GRADUATE PROGRAM—DOCTOR OF COMPUTER SCIENCE, JAKARTA, INDONESIA; ADVANCED INSTITUTE OF INDUSTRIAL TECHNOLOGY, TOKYO, JAPAN	LECT. NOTES NETWORKS SYST.	SEVERAL CHALLENGES HAVE EMERGED AS A RESULT OF THE RAPID SPREAD OF COVID-19 IN INDONESIA. TO COMBAT THE PANDEMIC, THE GOVERNMENT HAS ALSO ISSUED GENERAL GUIDELINES FOR AVOIDING/LIMITING DIRECT CONTACT WITH COMMON PEOPLE WHO DO NOT LIVE WITH THEM. HOWEVER, IN SOME UNAVOIDABLE CASES, SUCH AS CASH TRANSACTIONS, THE SOCIAL DISTANCING HAS NOT YET BEEN FOLLOWED PROPERLY. THESE TYPE OF CHALLENGES CAN BE…	F.L. GAOL; BINUS GRADUATE PROGRAM—DOCTOR OF COMPUTER SCIENCE, JAKARTA, INDONESIA; EMAIL: FGAOL@BINUS.EDU	10.1007/978-981-19-7402-1_31	23673370	LECTURE NOTES IN NETWORKS AND SYSTEMS	ENGLISH	0		SPRINGER SCIENCE AND BUSINESS MEDIA DEUTSCHLAND GMBH	ISI	USE OF EWALLET AS A SUBSTITUTE FOR PHYSICAL MONEY IN TRANSACTIONS AT MALLS	CONFERENCE PAPER	563	2023	KURNIAWAN ACHMAD RIZKY;IMAM RAFIF;ZHALIFUNNAS RIFQI FARHAN;PUTRA ARMANDO RAMA;GAOL FORD LUMBAN;MATSUO TOKURO	LECT NOTES NETWORKS SYST	none	BINA NUSANTARA UNIVERSITY;BINUS GRADUATE PROGRAM—DOCTOR OF COMPUTER SCIENCE;ADVANCED INSTITUTE OF INDUSTRIAL TECHNOLOGY	NOTREPORTED;BINUS GRADUATE PROGRAM—DOCTOR OF COMPUTER SCIENCE;NOTREPORTED		KURNIAWAN AR, 2023, LECT NOTES NETWORKS SYST	KURNIAWAN AR, 2023, LECT NOTES NETWORKS SYST	JAPAN	KURNIAWAN AR, 2023,	wos
HASSAN M	AFRICA; BLUE OCEAN STRATEGY; COMPETITIVE STRATEGY; EAST AFRICA; INNOVATION; MARKETING; RED OCEAN STRATEGY; SOMALIA; STRATEGY CANVAS		FACULTY OF MANAGEMENT SCIENCES, SIMAD UNIVERSITY, MOGADISHU, SOMALIA	EMERALD EMERG. MARK. CASE STUD.	LEARNING OUTCOMES: UPON READING, ANALYZING AND PARTICIPATING IN THE CLASSROOM DISCUSSION OF THIS CASE STUDY, STUDENTS WILL BE ABLE TO USE THE BLUE OCEAN STRATEGY (MAINLY THE STRATEGY CANVAS TOOL) TO ANALYZE HOW COMPANIES ESTABLISH THEIR PRODUCTS AS VIABLE AND THE GO-TO SOLUTION FOR CONSUMERS; PERFORM A COMPETITIVE ANALYSIS FOR COMPETITIVE PRODUCTS; LEARN HOW TO USE DATA FROM THE CASE, INCLUDING I…	M.M. HASSAN; FACULTY OF MANAGEMENT SCIENCES, SIMAD UNIVERSITY, MOGADISHU, SOMALIA; EMAIL: MMUSE@SIMAD.EDU.SO	10.1108/EEMCS-01-2023-0030	20450621	EMERALD EMERGING MARKETS CASE STUDIES	ENGLISH	0	4	EMERALD PUBLISHING	ISI	PREMIER WALLET BANKING THE UNBANKED POPULATION IN SOMALIA	ARTICLE	13	2023	HASSAN MOHAMED MUSE	EMERALD EMERG MARK CASE STUD	none	SIMAD UNIVERSITY	NOTREPORTED;SIMAD UNIVERSITY;NOTREPORTED		HASSAN MM, 2023, EMERALD EMERG MARK CASE STUD	HASSAN MM, 2023, EMERALD EMERG MARK CASE STUD	SOMALIA	HASSAN MM, 2023,	wos
SATYBALDY A	DIGITAL WALLET; SELF-SOVEREIGN IDENTITY; USABILITY STUDY	AUTHENTICATION; DATA PRIVACY; ELECTRONIC DOCUMENT IDENTIFICATION SYSTEMS; DECENTRALISED; DIGITAL WALLETS; IDENTITY MANAGEMENT; IDENTITY MANAGEMENT SYSTEMS; IDENTITY MODELS; SELF-SOVEREIGN IDENTITY; SERVICE PROVIDER; USABILITY EVALUATION; USABILITY STUDIES; USER-CENTRIC; USABILITY ENGINEERING	COMPUTER SCIENCE DEPARTMENT, NTNU, GJØVIK, NORWAY	IFIP ADVANCES IN INFORMATION AND COMMUNICATION TECHNOLOGY	SELF-SOVEREIGN IDENTITY (SSI) IS A NEW DECENTRALIZED ECOSYSTEM FOR SECURE AND PRIVATE IDENTITY MANAGEMENT. IN CONTRAST TO MOST PREVIOUS IDENTITY MANAGEMENT SYSTEMS WHERE THE SERVICE PROVIDER WAS AT THE CENTER OF THE IDENTITY MODEL, SSI IS USER-CENTRIC AND ELIMINATES THE NEED FOR A CENTRAL AUTHORITY. IT ALLOWS THE USER TO OWN THEIR IDENTITY AND CARRY IT AROUND IN A FORM OF DIGITAL IDENTITY WALLET,…	A. SATYBALDY; COMPUTER SCIENCE DEPARTMENT, NTNU, GJØVIK, NORWAY; EMAIL: ABYLAY.SATYBALDY@NTNU.NO	10.1007/978-3-031-31971-6_9	18684238	IFIP ADVANCES IN INFORMATION AND COMMUNICATION TECHNOLOGY	ENGLISH	1		SPRINGER SCIENCE AND BUSINESS MEDIA DEUTSCHLAND GMBH	ISI	USABILITY EVALUATION OFSSI DIGITAL WALLETS	CONFERENCE PAPER	671 IFIP	2023	SATYBALDY ABYLAY	IFIP ADVANCES IN INFORMATION AND COMMUNICATION TECHNOLOGY	none	COMPUTER SCIENCE DEPARTMENT	NOTREPORTED;COMPUTER SCIENCE DEPARTMENT;NOTREPORTED		SATYBALDY A, 2023, IFIP ADVANCES IN INFORMATION AND COMMUNICATION TECHNOLOGY	SATYBALDY A, 2023, IFIP ADVANCES IN INFORMATION AND COMMUNICATION TECHNOLOGY	NORWAY	SATYBALDY A, 2023,	wos
SHEKHAR R;JAIDEV U	CLUSTER ANALYSIS; DIFFUSION OF INNOVATION THEORY; MOBILE WALLET APP ENGAGEMENT; MWAE; STRUCTURAL EQUATION MODELLING; WOM; WORD OF MOUTH RECOMMENDATION		SYMBIOSIS CENTRE FOR MANAGEMENT STUDIES (SCMS), SYMBIOSIS INTERNATIONAL (DEEMED UNIVERSITY) (SIU), MOUZA-WATHODA, MAHARASHTRA, NAGPUR, INDIA; SCHOOL OF BUSINESS, WOXSEN UNIVERSITY, HYDERABAD, INDIA	INT. J. ENTERP. NETWORK MANAGE.	THE MAIN AIM OF THIS STUDY IS TO IDENTIFY THE FACTORS INFLUENCING THE MOBILE WALLET APP ENGAGEMENT (MWAE) AND EXAMINE THOSE FACTORS FOR SEGMENTING USERS INTO DIFFERENT CLUSTERS. THE RESEARCHERS ALSO WANTED TO DETERMINE IF MWAE LEADS TO WORD OF MOUTH (WOM) RECOMMENDATION. PREVIOUS RESEARCH INDICATES THAT CUSTOMISATION, KNOWLEDGE, RELATIVE ADVANTAGE AND COMPATIBILITY COULD BE POSSIBLE ANTECEDENTS O…	U.P. JAIDEV; SCHOOL OF BUSINESS, WOXSEN UNIVERSITY, HYDERABAD, INDIA; EMAIL: UMA.JAIDEV@WOXSEN.EDU.IN	10.1504/IJENM.2023.130770	17481252	INTERNATIONAL JOURNAL OF ENTERPRISE NETWORK MANAGEMENT	ENGLISH	0	12	INDERSCIENCE PUBLISHERS	ISI	MOBILE WALLET APP ENGAGEMENT AND WORD OF MOUTH RECOMMENDATION AN EXPLORATION OF ANTECEDENTS	ARTICLE	14	2023	SHEKHAR RISHABH;JAIDEV UMA PRICILDA	INT J ENTERP NETWORK MANAGE	none	SYMBIOSIS INTERNATIONAL (DEEMED UNIVERSITY) (SIU);WOXSEN UNIVERSITY	NOTREPORTED;WOXSEN UNIVERSITY;NOTREPORTED		SHEKHAR R, 2023, INT J ENTERP NETWORK MANAGE	SHEKHAR R, 2023, INT J ENTERP NETWORK MANAGE	INDIA	SHEKHAR R, 2023,	wos
GLÖCKLER J;SEDLMEIR J;FRANK M;FRIDGEN G	AUTHENTICATION; DIGITAL WALLET; IAM; SECURITY; SSI; VERIFIABLE CREDENTIAL		UNIVERSITY OF BAYREUTH, BAYREUTH, GERMANY; BRANCH BUSINESS AND INFORMATION SYSTEMS ENGINEERING OF FRAUNHOFER FIT, BAYREUTH, GERMANY; INTERDISCIPLINARY CENTRE FOR SECURITY, RELIABILITY AND TRUST, UNIVERSITY OF LUXEMBOURG, LUXEMBOURG, LUXEMBOURG	BUSIN. INFO. SYS. ENG.	DIGITAL IDENTITY AND ACCESS MANAGEMENT (IAM) POSES SIGNIFICANT CHALLENGES FOR COMPANIES. CYBERATTACKS AND RESULTING DATA BREACHES FREQUENTLY HAVE THEIR ROOT CAUSE IN ENTERPRISES’ IAM SYSTEMS. DURING THE COVID-19 PANDEMIC, ISSUES WITH THE REMOTE AUTHENTICATION OF EMPLOYEES WORKING FROM HOME HIGHLIGHTED THE NEED FOR BETTER IAM SOLUTIONS. USING A DESIGN SCIENCE RESEARCH APPROACH, THE PAPER REVIEWS T…	J. SEDLMEIR; INTERDISCIPLINARY CENTRE FOR SECURITY, RELIABILITY AND TRUST, UNIVERSITY OF LUXEMBOURG, LUXEMBOURG, LUXEMBOURG; EMAIL: JOHANNES.SEDLMEIR@UNI.LU	10.1007/s12599-023-00830-x	23637005	BUSINESS AND INFORMATION SYSTEMS ENGINEERING	ENGLISH	2		SPRINGER GABLER	ISI	A SYSTEMATIC REVIEW OF IDENTITY AND ACCESS MANAGEMENT REQUIREMENTS IN ENTERPRISES AND POTENTIAL CONTRIBUTIONS OF SELFSOVEREIGN IDENTITY	ARTICLE		2023	GLÖCKLER JANA;SEDLMEIR JOHANNES;FRANK MURIEL;FRIDGEN GILBERT	BUSIN INFO SYS ENG	none	UNIVERSITY OF BAYREUTH;UNIVERSITY OF LUXEMBOURG	NOTREPORTED;UNIVERSITY OF LUXEMBOURG;NOTREPORTED		GLÖCKLER J, 2023, BUSIN INFO SYS ENG	GLÖCKLER J, 2023, BUSIN INFO SYS ENG	LUXEMBOURG	GLÖCKLER J, 2023,	wos
ALGHAMDI W;ALKHAMASH R;ALSUFYANI A;ALSUWAT R;ALHARTHI A;ALGETHAMI R;ALAZWARI S	APPLICATION; ARTIFICIAL INTELLIGENCE (AI); CHATBOT; HUMAN COMPUTER INTERACTION (HCI); INTERACTIVE MAP	APPLICATION PROGRAMS; HUMAN COMPUTER INTERACTION; SOFTWARE AGENTS; ARTIFICIAL INTELLIGENCE; CHATBOTS; COMMUNICATION SESSIONS; DIGITAL WALLETS; HUMAN COMPUTER INTERACTION; INTERACTIVE MAPS; SERVICES APPLICATIONS; SMART AGENTS; SMART SERVICES; UNIVERSITY ID; STUDENTS	FACULTY OF COMPUTER SCIENCE AND INFORMATION TECHNOLOGY, TA'IF UNIVERSITY, TA'IF, SAUDI ARABIA	PROCEDIA COMPUT. SCI.	WHEN IT COMES TO UNIVERSITY LIFE, UNIVERSITY SERVICES, AND COMMUNICATION WITH STAFF, THINGS CAN BE DIFFICULT AND COMPLICATED, ESPECIALLY FOR NEWLY JOINED STUDENTS. THIS PAPER PROVIDES TU-SMART SERVICES APPLICATION WHICH FOCUS ON FILLING THE GAP BETWEEN STUDENTS, UNIVERSITY SERVICES AND STAFF WITH IN TA'IF UNIVERSITY (TU). OUR APP CONSISTS OF FOUR MAIN FEATURES: CODY, A SMART CONVERSATIONAL CHATBO…	W.Y. ALGHAMDI; FACULTY OF COMPUTER SCIENCE AND INFORMATION TECHNOLOGY, TA'IF UNIVERSITY, TA'IF, SAUDI ARABIA; EMAIL: W.ALGHAMDI@TU.EDU.SA	10.1016/j.procs.2023.03.011	18770509	PROCEDIA COMPUTER SCIENCE	ENGLISH	1		ELSEVIER B.V.	ISI	SOFTWARE SMART AGENT FOR TAIF UNIVERSITY SERVICES	CONFERENCE PAPER	220	2023	ALGHAMDI WAEL Y;ALKHAMASH RANA A;ALSUFYANI ATHEER A;ALSUWAT RAWAN D;ALHARTHI ATHEER D;ALGETHAMI RAGHAD M;ALAZWARI SHAHAD S	PROCEDIA COMPUT SCI	none	TA'IF UNIVERSITY	NOTREPORTED;TA'IF UNIVERSITY;NOTREPORTED		ALGHAMDI WY, 2023, PROCEDIA COMPUT SCI	ALGHAMDI WY, 2023, PROCEDIA COMPUT SCI	SAUDI ARABIA	ALGHAMDI WY, 2023,	wos
AJINA A;JOUDEH J;ALI N;ZAMIL A;HASHEM T	COST; EASE OF USE; MOBILE-WALLETS; SECURITY; SERVICE QUALITY; USEFULNESS		MARKETING DEPARTMENT, COLLEGE OF BUSINESS ADMINISTRATION, PRINCE SATTAM BIN ABDULAZIZ UNIVERSITY, AL-KHARJ, SAUDI ARABIA; MARKETING DEPARTMENT, FACULTY OF BUSINESS, APPLIED SCIENCE PRIVATE UNIVERSITY, MEU RESEARCH UNIT, AMMAN, JORDAN; MARKETING DEPARTMENT, FACULTY OF BUSINESS, AL-ZAYTOONAH UNIVERSITY OF JORDAN, AMMAN, JORDAN; MARKETING DEPARTMENT, BUSINESS FACULTY, ISRA UNIVERSITY, AMMAN, JORDAN	COGENT BUS. MANAG.	ELECTRONIC PAYMENT OPTIONS HAVE MOSTLY SUPERSEDED TRADITIONAL CASH PAYMENT METHODS. THE GROWTH OF DIGITAL WALLETS, E-COMMERCE, MOBILE PAYMENTS, AND OTHER UNUSUAL PAYMENT METHODS HAS MOVED THE GLOBAL ECONOMY ONE STEP CLOSER TO A CASHLESS SOCIETY. THEREFORE, THIS STUDY AIMS TO UNDERSTAND HOW MOBILE-WALLET SERVICE QUALITY DIMENSIONS AFFECT CUSTOMER SATISFACTION AND LOYALTY, AS WELL AS TO EXPLORE USE…	A.S. AJINA; MARKETING DEPARTMENT, COLLEGE OF BUSINESS ADMINISTRATION, PRINCE SATTAM BIN ABDULAZIZ UNIVERSITY, AL-KHARJ, SAUDI ARABIA; EMAIL: A.AJINA@PSAU.EDU.SA	10.1080/23311975.2023.2229544	23311975	COGENT BUSINESS AND MANAGEMENT	ENGLISH	3	2	COGENT OA	ISI	THE EFFECT OF MOBILEWALLET SERVICE DIMENSIONS ON CUSTOMER SATISFACTION AND LOYALTY AN EMPIRICAL STUDY	ARTICLE	10	2023	AJINA AHMED S;JOUDEH JAMAL M M;ALI NAFEZ N;ZAMIL AHMAD M;HASHEM TAREQ N	COGENT BUS MANAG	none	PRINCE SATTAM BIN ABDULAZIZ UNIVERSITY;APPLIED SCIENCE PRIVATE UNIVERSITY;AL-ZAYTOONAH UNIVERSITY OF JORDAN;ISRA UNIVERSITY	NOTREPORTED;PRINCE SATTAM BIN ABDULAZIZ UNIVERSITY;NOTREPORTED		AJINA AS, 2023, COGENT BUS MANAG	AJINA AS, 2023, COGENT BUS MANAG-a	JORDAN	AJINA AS, 2023,	wos
APRILIA C;AMALIA R	ATTITUDE; CONTINUANCE INTENTION; PERCEIVED SECURITY; PERCEIVED USEFULNESS; SATISFACTION; TECHNOLOGY CONTINUANCE THEORY		DEPARTMENT OF MANAGEMENT, FACULTY OF ECONOMICS AND BUSINESS, UNIVERSITAS SYIAH KUALA, ACEH, BANDA ACEH, INDONESIA	GLOBAL BUS. REV.	THE OBJECTIVE OF THIS STUDY IS TO INVESTIGATE THE DETERMINANT FACTORS OF MOBILE WALLET USERS’ CONTINUANCE INTENTION IN INDONESIA. IT INTEGRATES TECHNOLOGY CONTINUANCE THEORY (TCT) WITH PERCEIVED SECURITY. MOBILE WALLET HAS BEEN RECEIVED WELL BY INDONESIAN; HOWEVER, THE SUSTAINABILITY OF THE BUSINESS IS CHALLENGED BY SEVERAL ISSUES, SUCH AS FIERCE COMPETITION, SECURITY CONCERN, THE PRACTICE OF BUR…	C. APRILIA; DEPARTMENT OF MANAGEMENT, FACULTY OF ECONOMICS AND BUSINESS, UNIVERSITAS SYIAH KUALA, BANDA ACEH, ACEH, INDONESIA; EMAIL: CUT.APRILIA@USK.AC.ID	10.1177/09721509221145831	09721509	GLOBAL BUSINESS REVIEW	ENGLISH	7		SAGE PUBLICATIONS INDIA PVT. LTD	ISI	PERCEIVED SECURITY AND TECHNOLOGY CONTINUANCE THEORY AN ANALYSIS OF MOBILE WALLET USERS CONTINUANCE INTENTION	ARTICLE		2023	APRILIA CUT;AMALIA RIZKI	GLOBAL BUS REV	none	UNIVERSITAS SYIAH KUALA	NOTREPORTED;UNIVERSITAS SYIAH KUALA;NOTREPORTED		APRILIA C, 2023, GLOBAL BUS REV	APRILIA C, 2023, GLOBAL BUS REV	INDONESIA	APRILIA C, 2023,	wos
YANG X;YANG J;HOU Y;LI S;SUN S;CANEPA A;SHAH K;VISCONTI A	FINTECH; FSQCA; GAMIFICATION; INNOVATION; MOBILE WALLET; OTCALYSIS GAMIFICATION; UTAUT2		DEAN OF INTERNATIONAL SCHOOL OF ZHEJIANG, YUEXIU UNIVERSITY, SHAOXING KEY LABORATORY OF INTELLIGENT MONITORING AND PREVENTION OF SMART CITY, SHAOXING, 312069, CHINA; SHEFFIELD UNIVERSITY MANAGEMENT SCHOOL, THE UNIVERSITY OF SHEFFIELD, CONDUIT ROAD, S10 1FL, UNITED KINGDOM; SCHOOL OF ECONOMICS AND MANAGEMENT, BEIJING INSTITUTE OF TECHNOLOGY, BEIJING, 100081, CHINA;ECONOMIC LAW, UNIVERSITY OF MILAN…	J. BUS. RES. LAW ECON. YRLY. REV.	ALTHOUGH DIGITALISATION BRINGS IMPORTANT POSSIBILITIES TO BANKING & FINANCE SERVICE, IMPLEMENTING DIGITAL TECHNOLOGIES IN PRACTICES CAN BE CHALLENGING. INDEED, THE ADOPTION OF NEW INNOVATIVE TECHNOLOGY IN THE BANKING & FINANCE SECTOR LAGS BEHIND OTHER BUSINESS SECTORS. MANY OF THE VALUABLE BANKING & FINANCE-RELATED TECHNOLOGIES HAVE NOT BEEN ADOPTED IN RELATION TO THE STRATEGIC IMPLICATIONS OF DE…	S. LI; SHEFFIELD UNIVERSITY MANAGEMENT SCHOOL, THE UNIVERSITY OF SHEFFIELD, CONDUIT ROAD, S10 1FL, UNITED KINGDOM; EMAIL: SHUYANG.LI@SHEFFIELD.AC.UK; S. SUN; SCHOOL OF ECONOMICS AND MANAGEMENT, BEIJING INSTITUTE OF TECHNOLOGY, BEIJING, 100081, CHINA; EMAIL: SHIWEISUN@BIT.EDU.CN	10.1016/j.jbusres.2022.113406	01482963 20509014	JOURNAL OF BUSINESS RESEARCH LAW AND ECONOMICS YEARLY REVIEW	ENGLISH ENGLISH	19		ELSEVIER INC. FONDAZIONE GERARDO CAPRIGLIONE ONLUS	ISI	GAMIFICATION OF MOBILE WALLET AS AN UNCONVENTIONAL INNOVATION FOR PROMOTING FINTECH AN FSQCA APPROACH NFTS AND CRYPTO ART MARKETPLACES NEW RISKS FOR INVESTORS AND FINANCIAL MARKETS	ARTICLE ARTICLE	155 11	2023	YANG XIAOPING;YANG JINGSHAN;HOU YILIN;LI SHUYANG;SUN SHIWEI;CANEPA ALLEGRA;SHAH KAUSHAL A;VISCONTI ANDREA	J BUS RES LAW ECON YRLY REV	none	YUEXIU UNIVERSITY;SHEFFIELD UNIVERSITY MANAGEMENT SCHOOL;SCHOOL OF ECONOMICS AND MANAGEMENT;UNIVERSITY OF MILAN;PANDIT DEENDAYAL ENERGY UNIVERSITY;UNIVERSITY OF MILAN	NOTREPORTED;SHEFFIELD UNIVERSITY MANAGEMENT SCHOOL;NOTREPORTED;NOTREPORTED;SCHOOL OF ECONOMICS AND MANAGEMENT;NOTREPORTED		YANG X, 2023, J BUS RES LAW ECON YRLY REV	YANG X, 2023, J BUS RES LAW ECON YRLY REV	ITALY	YANG X, 2023,	wos
GUPTA U;AGARWAL B		ELECTRONIC MONEY; FINANCIAL INCLUSIONS; FINANCIAL SERVICE; GOVERNMENT SUPPORTS; INFLUENTIAL FACTORS; MICRO-ENTERPRISES; MOBILE TECHNOLOGY; SMALL-AND-MEDIUM ENTERPRISE; FINANCE	AMITY COLLEGE OF COMMERCE AND FINANCE, AMITY UNIVERSITY, UTTAR PRADESH, NOIDA, INDIA	ECS TRANSACTIONS	THE MOBILE MONEY AWARENESS HAS INCREASED TO 33% IN 2020 AS COMPARED TO 18% IN 2019, COVID-19 LED A LARGE PROPORTION OF MOBILE MONEY USERS TO USE MORE SOPHISTICATED FINANCIAL SERVICES SUCH AS CREDIT, SAVINGS, AND INSURANCE. THE PURPOSE OF THIS PAPER IS TO EXAMINE THE ROLE OF MOBILE PHONES IN ADOPTING FINANCIAL TECHNOLOGY ON REGISTERED MICRO, SMALL, AND MEDIUM ENTERPRISES OF INDIA. THE STUDY WILL R…		10.1149/10701.19715ecst	19386737	ECS TRANSACTIONS	ENGLISH	1	1	INSTITUTE OF PHYSICS	ISI	ROLE OF MOBILE TECHNOLOGY IN PROVIDING FINANCIAL INCLUSION TO MSMES OF INDIA	CONFERENCE PAPER	107	2022	GUPTA U;AGARWAL B	ECS TRANSACTIONS	none	AMITY UNIVERSITY	AMITY UNIVERSITY		GUPTA U, 2022, ECS TRANSACTIONS	GUPTA U, 2022, ECS TRANSACTIONS	INDIA	GUPTA U, 2022,	wos
SANNY L;ISKANDAR I;KELANA B	E-WALLET; GAMIFICATION; INNOVATION ADOPTION; REWARD PROGRAM	COMMERCE; DIFFUSIONS OF INNOVATION THEORIES; E-WALLET; GAMIFICATION; INDONESIA; INNOVATION ADOPTION; PROGRAM PERFORMANCE; REWARD PROGRAMS; USER ADOPTIONS; USER INNOVATION; USERS PERSPECTIVE; FACTOR ANALYSIS	BINUS BUSINESS SCHOOL MASTER PROGRAM, BINA NUSANTARA UNIVERSITY, MANAGEMENT DEPARTMENT, JAKARTA, INDONESIA; BINUS BUSINESS SCHOOL UNDERGRADUATE PROGRAM, BINA NUSANTARA UNIVERSITY, MANAGEMENT DEPARTMENT, JAKARTA, INDONESIA; AZMAN HASHIM INTERNATIONAL BUSINESS SCHOOL, UNIVERSITI TEKNOLOGI MALAYSIA, JOHOR, MALAYSIA	INT. CONF. CYBER IT SERV. MANAG., CITSM	THERE IS A GROWING TREND OF IMPLEMENTING A REWARD PROGRAM IN E-WALLET MARKET IN INDONESIA WITH A GAMIFICATION CONCEPT. UNDERSTANDING INNOVATION ADOPTION TOWARDS PROGRAM CAN HELP TO SEE THE PROGRAM PERFORMANCE FROM USERS' PERSPECTIVE. THE OBJECTIVE OF THIS RESEARCH TO INVESTIGATE USERS' INNOVATION AND ADOPTION TOWARDS THE REWARD PROGRAM WITH PERCEIVED ATTRIBUTES OF INNOVATION FROM DIFFUSION OF INN…		10.1109/CITSM56380.2022.9935942		2022 10TH INTERNATIONAL CONFERENCE ON CYBER AND IT SERVICE MANAGEMENT, CITSM 2022	ENGLISH	0		INSTITUTE OF ELECTRICAL AND ELECTRONICS ENGINEERS INC.	ISI	GAMIFICATION REWARD IN INDONESIAS EWALLET MARKET	CONFERENCE PAPER		2022	SANNY LIM;ISKANDAR IRENE;KELANA BENI WIDARMAN BIN YUS	INT CONF CYBER IT SERV MANAG, CITSM	none	BINA NUSANTARA UNIVERSITY;BINA NUSANTARA UNIVERSITY;UNIVERSITI TEKNOLOGI MALAYSIA	BINA NUSANTARA UNIVERSITY;BINA NUSANTARA UNIVERSITY;UNIVERSITI TEKNOLOGI MALAYSIA		SANNY L, 2022, INT CONF CYBER IT SERV MANAG, CITSM	SANNY L, 2022, INT CONF CYBER IT SERV MANAG, CITSM	MALAYSIA	SANNY L, 2022, INT CONF CYBER IT SERV MANAG,	wos
KINIŞ F;TANOVA C	E-WALLET; MOBILE PAYMENT; TECHNOLOGY ACCEPTANCE MODEL		FACULTY OF BUSINESS AND ECONOMICS, EASTERN MEDITERRANEAN UNIVERSITY, VIA MERSIN 10, NORTH CYPRUS, GAZIMAGUSA, 99628, TURKEY	J. THEOR. APPL. ELECTRON. COMMER. RES.	E-WALLETS AND MOBILE PAYMENT SYSTEMS PROVIDE FAST, SECURE, AND CONVENIENT PAYMENT IN TRANSACTIONS SERVICES WHILE MINIMIZING THE NEED FOR HUMAN INTERACTION. HOWEVER, THE ADOPTION OF THE TECHNOLOGY HAS HAD VARYING LEVELS OF SUCCESS. USING A SAMPLE OF 300 RESPONDENTS, THE STUDY RANDOMLY ASSIGNED PARTICIPANTS INTO THREE CONDITIONS AND PROVIDED DIFFERENT INFORMATION ON HOW THEY WOULD BE REIMBURSED BY …	F. KINIŞ; FACULTY OF BUSINESS AND ECONOMICS, EASTERN MEDITERRANEAN UNIVERSITY, GAZIMAGUSA, VIA MERSIN 10, NORTH CYPRUS, 99628, TURKEY; EMAIL: FKINIS7@GMAIL.COM	10.3390/jtaer17040086	07181876	JOURNAL OF THEORETICAL AND APPLIED ELECTRONIC COMMERCE RESEARCH	ENGLISH	9	4	MDPI	ISI	CAN I TRUST MY PHONE TO REPLACE MY WALLET THE DETERMINANTS OF EWALLET ADOPTION IN NORTH CYPRUS	ARTICLE	17	2022	KINIŞ FATMA;TANOVA CEM	J THEOR APPL ELECTRON COMMER RES	none	EASTERN MEDITERRANEAN UNIVERSITY	NOTREPORTED;EASTERN MEDITERRANEAN UNIVERSITY;NOTREPORTED		KINIŞ F, 2022, J THEOR APPL ELECTRON COMMER RES	KINIŞ F, 2022, J THEOR APPL ELECTRON COMMER RES	TURKEY	KINIŞ F, 2022,	wos
IKHSAN R;SARI C;FERNANDO E;WIJAYA L;BANGAPADANG S;SANGKERENG I	ATTITUDE; BEHAVIORAL INTENTION; E-WALLET; LIFESTYLE COMPATIBILITY; TRUST	ATTITUDE; BEHAVIORAL INTENTION; CONDITION; DATA COLLECTION; E-WALLET; EMPIRICAL STUDIES; LIFESTYLE COMPATIBILITY; ONLINE QUESTIONNAIRE; PAYMENT SYSTEMS; TRUST	BINUS ONLINE LEARNING BINA NUSANTARA UNIVERSITY, MANAGEMENT DEPARTMENT, JAKARTA, INDONESIA; INFORMATION SYSTEM, INSTITUTE TECHNOLOGY AND BUSINESS, KALBIS, JAKARTA, INDONESIA	INT. CONF. CYBER IT SERV. MANAG., CITSM	THE RAPID ADOPTION OF E-WALLETS BY THE COMMUNITY INDICATES THAT THIS PAYMENT SYSTEM IS WELL RECEIVED. OF COURSE, THIS CONDITION CANNOT BE SEPARATED FROM TRUST AND CONSUMER LIFESTYLE. THIS STUDY EXAMINES LIFESTYLE COMPATIBILITY, TRUST, AND ATTITUDES ON CUSTOMER BEHAVIORAL INTENTION. DATA COLLECTION USES AN ONLINE QUESTIONNAIRE DISTRIBUTED TO 336 E-WALLET USERS THROUGH SOCIAL MEDIA. THEN, THE DATA …		10.1109/CITSM56380.2022.9935931		2022 10TH INTERNATIONAL CONFERENCE ON CYBER AND IT SERVICE MANAGEMENT, CITSM 2022	ENGLISH	2		INSTITUTE OF ELECTRICAL AND ELECTRONICS ENGINEERS INC.	ISI	THE RAPID ADOPTION OF EWALLET AN EMPIRICAL STUDY	CONFERENCE PAPER		2022	IKHSAN RIDHO BRAMULYA;SARI CYNTIA LUPITA;FERNANDO ERICK;WIJAYA LIANNA;BANGAPADANG STEPHANIE;SANGKERENG IVAN	INT CONF CYBER IT SERV MANAG, CITSM	none	BINUS ONLINE LEARNING BINA NUSANTARA UNIVERSITY;INSTITUTE TECHNOLOGY AND BUSINESS	BINUS ONLINE LEARNING BINA NUSANTARA UNIVERSITY;INSTITUTE TECHNOLOGY AND BUSINESS		IKHSAN RB, 2022, INT CONF CYBER IT SERV MANAG, CITSM	IKHSAN RB, 2022, INT CONF CYBER IT SERV MANAG, CITSM	INDONESIA	IKHSAN RB, 2022, INT CONF CYBER IT SERV MANAG,	wos
WIRADINATA T;HERDINATA C;CHRISTIAN S;SETIOBUDI A	ELECTRONIC WALLET; ENVIRONMENT; ORGANISATION; TECHNOLOGY	DISCOUNTED PRICE; ELECTRONIC WALLET; ENVIRONMENT; INDONESIA; PAYMENT SERVICES; RESEARCH USE; SALES REVENUE; SMALL AND MEDIUM SIZED BUSINESS; TECHNOLOGY; TECHNOLOGY-ORGANIZATION-ENVIRONMENT FRAMEWORKS; ELECTRONIC MONEY	SCHOOL OF INFORMATION TECHNOLOGY, UNIVERSITAS CIPUTRA SURABAYA, CITRALAND CBD BOULEVARD, SURABAYA, 60219, INDONESIA	INT. J. INF. SYST. CHANGE MANGE.	THE DEVELOPMENT OF FINANCIAL TECHNOLOGY IN INDONESIA IN GENERAL HAS INCREASED EXPONENTIALLY DURING THE LAST DECADE. IN PARTICULAR, THE RAPID AND MASSIVE E-WALLET PROMOTION OFFERED BY SEVERAL PROMINENT VENDORS HAS RAISED NEW OPPORTUNITIES FOR SMALL AND MEDIUM-SIZED BUSINESSES (SMBS) TO INCREASE SALES REVENUE. IN ADDITION, E-WALLET USE HAS BOOSTED THE ENTHUSIASM OF CONSUMERS THROUGH VARIOUS DISCOUN…	T. WIRADINATA; SCHOOL OF INFORMATION TECHNOLOGY, UNIVERSITAS CIPUTRA SURABAYA, SURABAYA, CITRALAND CBD BOULEVARD, 60219, INDONESIA; EMAIL: TWIRADINATA@CIPUTRA.AC.ID	10.1504/ijiscm.2022.127056	14793121	INTERNATIONAL JOURNAL OF INFORMATION SYSTEMS AND CHANGE MANAGEMENT	ENGLISH	1	1	INDERSCIENCE PUBLISHERS	ISI	ACCELERATING ELECTRONIC WALLET PAYMENT SERVICE ADOPTION IN INDONESIAN SMALL AND MEDIUMSIZED BUSINESSES	CONFERENCE PAPER	13	2022	WIRADINATA TRIANGGORO;HERDINATA CHRISTIAN;CHRISTIAN SONATA;SETIOBUDI AUDITIA	INT J INF SYST CHANGE MANGE	none	UNIVERSITAS CIPUTRA SURABAYA	NOTREPORTED;UNIVERSITAS CIPUTRA SURABAYA;NOTREPORTED		WIRADINATA T, 2022, INT J INF SYST CHANGE MANGE	WIRADINATA T, 2022, INT J INF SYST CHANGE MANGE	INDONESIA	WIRADINATA T, 2022,	wos
DAS D;JADHAV V	ANTITRUST LAW; ELECTRONIC COMMERCE; FUZZY PREFERENCE; NON-LINEAR PRICING; TRUST		SCHOOL OF MANAGEMENT, BML MUNJAL UNIVERSITY, GURGAON, INDIA; MADRAS SCHOOL OF ECONOMICS, CHENNAI, INDIA	J. ECON. STUD.	PURPOSE: TO UNDERSTAND THE NEW NON-LINEAR PRICING IN E-COMMERCE. THE PRESENT PAPER AIMS TO PUT FORTH AN IDEA OF USING TIE-IN AGREEMENT IN THE ELECTRONIC COMMERCE MARKET IN THE NAME OF TRUST IN INDIA. ACCORDING TO THE INDIAN ANTITRUST LAW, TIE-IN AGREEMENT IS NOT ALLOWED TO USE AS COMPULSORY IN AN OFFER TO THE BUYER. THIS MEANS THAT A TIE-IN AGREEMENT CANNOT BE A COMPULSION OR ONLY AN OPTION TO TH…	D. DAS; SCHOOL OF MANAGEMENT, BML MUNJAL UNIVERSITY, GURGAON, INDIA; EMAIL: DIPANKAR3DAS@GMAIL.COM	10.1108/JES-07-2021-0351	01443585	JOURNAL OF ECONOMIC STUDIES	ENGLISH	0	8	EMERALD PUBLISHING	ISI	NONLINEAR PRICING IN ECOMMERCE AN EXPLORATION	ARTICLE	49	2022	DAS DIPANKAR;JADHAV VIVEK SHARADADEVI	J ECON STUD	none	BML MUNJAL UNIVERSITY;MADRAS SCHOOL OF ECONOMICS	NOTREPORTED;BML MUNJAL UNIVERSITY;NOTREPORTED		DAS D, 2022, J ECON STUD	DAS D, 2022, J ECON STUD	INDIA	DAS D, 2022,	wos
JAMEEL A;RAHMAN A A;ALHEETY A	E-WALLETS; SECURITY; TAM; TRUST; USEFULNESS	LEAST SQUARES APPROXIMATIONS; BEHAVIORAL INTENTION; E-WALLET; INTENTION TO USE; PERCEIVED SECURITIES; PERCEIVED TRUSTS; SECURITY; SECURITY AND TRUSTS; TECHNOLOGY ACCEPTANCE MODEL; TRUST; USEFULNESS; SURVEYS	CIHAN UNIVERSITY-ERBIL, DEPARTMENT OF PUBLIC ADMINISTRATION, ERBIL, IRAQ; UNIVERSITI TUN HUSSEIN ONN MALAYSIA, FACULTY OF TECHNOLOGY MANAGEMENT AND BUSINESS, JOHOR, MALAYSIA; UNIVERSITY IN LEBANON, ARTS, SCIENCES AND TECHNOLOGY, DEPARTMENT OF BUSINESS ADMINISTRATION, BEIRUT, LEBANON	INT. CONF. EMERG. SMART TECHNOL. APPL., ESMARTA	THIS STUDY AIMS TO DETERMINE THE BEHAVIORAL INTENTION (BI) TO USE E-WALLETS AMONG THE USERS. THE MODEL WAS DEVELOPED BASED ON THE TECHNOLOGY ACCEPTANCE MODEL (TAM). THE STUDY EXTENDED THE MODEL BY EXAMINING THE IMPACT OF PERCEIVED SECURITY (PS) AND PERCEIVED TRUST (PT) BESIDE THE MAIN TAM ELEMENTS PERCEIVED EASE OF USE (PEOU) AND PERCEIVED USEFULNESS (PU). THE DATA WAS COLLECTED FROM IRAQI CITIZE…		10.1109/eSmarTA56775.2022.9935423		2022 2ND INTERNATIONAL CONFERENCE ON EMERGING SMART TECHNOLOGIES AND APPLICATIONS, ESMARTA 2022	ENGLISH	2		INSTITUTE OF ELECTRICAL AND ELECTRONICS ENGINEERS INC.	ISI	BEHAVIOURAL INTENTION TO USE EWALLET THE PERSPECTIVE OF SECURITY AND TRUST	CONFERENCE PAPER		2022	JAMEEL ALAA S;RAHMAN AHMAD ABD;ALHEETY AHMED S	INT CONF EMERG SMART TECHNOL APPL, ESMARTA	none	CIHAN UNIVERSITY-ERBIL;UNIVERSITI TUN HUSSEIN ONN MALAYSIA;UNIVERSITY IN LEBANON	CIHAN UNIVERSITY-ERBIL;UNIVERSITI TUN HUSSEIN ONN MALAYSIA;UNIVERSITY IN LEBANON		JAMEEL AS, 2022, INT CONF EMERG SMART TECHNOL APPL, ESMARTA	JAMEEL AS, 2022, INT CONF EMERG SMART TECHNOL APPL, ESMARTA	LEBANON	JAMEEL AS, 2022, INT CONF EMERG SMART TECHNOL APPL,	wos
SANCHEZ J;TANPOCO M	CONTINUANCE INTENTION; MOBILE WALLETS; PERCEIVED USEFULNESS; TRUSTWORTHINESS; USER SATISFACTION		DE LA SALLE UNIVERSITY, PHILIPPINES	REV. INTEGR. BUS. ECON. RES.	MOBILE WALLET USAGE HAS INCREASED BY LEAPS AND BOUNDS DURING THE PANDEMIC WHEN MOBILITY OF PEOPLE WAS RESTRAINED. NOW THAT THE PHILIPPINES HAS TRANSITIONED BACK TO ALMOST HOW IT USED TO BE PRE-COVID, THE CONTINUOUS USE OF MOBILE WALLETS, WHICH DOMINATES FINANCIAL TRANSACTIONS IN THE METROPOLIS, IS IN PERIL. THIS STUDY SOUGHT TO PROVIDE EMPIRICAL EVIDENCE ON THE EFFECTS OF PERCEIVED EASE OF USE, U…			24146722	REVIEW OF INTEGRATIVE BUSINESS AND ECONOMICS RESEARCH	ENGLISH	1	3	GMP PRESS & PRINTING CO.,	ISI	CONTINUANCE INTENTION OF MOBILE WALLET USAGE IN THE PHILIPPINES A MEDIATION ANALYSIS	ARTICLE	12	2022	SANCHEZ JOE ANA ROSE;TANPOCO MANUEL	REV INTEGR BUS ECON RES	none	DE LA SALLE UNIVERSITY	DE LA SALLE UNIVERSITY		SANCHEZ JAR, 2022, REV INTEGR BUS ECON RES	SANCHEZ JAR, 2022, REV INTEGR BUS ECON RES	PHILIPPINES	SANCHEZ JAR, 2022,	wos
BANGANI S;JOKONYA O	CONTACTLESS TECHNOLOGIES; COVID-19; DIGITAL TRANSFORMATION; LOGISTICS; SUPPLY CHAIN; TOE FRAMEWORK		DEPARTMENT OF INFORMATION SYSTEMS, FACULTY OF ECONOMIC AND MANAGEMENT SCIENCES, UNIVERSITY OF THE WESTERN CAPE, CAPE TOWN, SOUTH AFRICA	J. TRANSP. SUPPLY CHAIN MANAG.	BACKGROUND: DIGITAL TRANSFORMATION HAS SIGNIFICANTLY REINVENTED THE SYSTEMS AND OPERATIONS IN THE SUPPLY CHAIN AND LOGISTICS INDUSTRIES, ENABLING ORGANISATIONS WITHIN THE INDUSTRY TO BE ABLE TO DELIVER HIGHER VALUE TO CUSTOMERS AT A LOWER COST. SOME OF THE TECHNOLOGIES THAT HAVE TAKEN UP THE INDUSTRY BY THE STORM INCLUDE CONTACTLESS TECHNOLOGIES SUCH AS RADIO FREQUENCY IDENTIFICATION, NEAR-FIELD …	O. JOKONYA; DEPARTMENT OF INFORMATION SYSTEMS, FACULTY OF ECONOMIC AND MANAGEMENT SCIENCES, UNIVERSITY OF THE WESTERN CAPE, CAPE TOWN, SOUTH AFRICA; EMAIL: OJOKONYA@UWC.AC.ZA	10.4102/jtscm.v16i0.751	23108789	JOURNAL OF TRANSPORT AND SUPPLY CHAIN MANAGEMENT	ENGLISH	0		AOSIS (PTY) LTD	ISI	FACTORS AFFECTING THE ADOPTION OF CONTACTLESS TECHNOLOGIES IN SUPPLY CHAIN AND LOGISTICS	ARTICLE	16	2022	BANGANI SIYASANGA;JOKONYA OSDEN	J TRANSP SUPPLY CHAIN MANAG	none	UNIVERSITY OF THE WESTERN CAPE	NOTREPORTED;UNIVERSITY OF THE WESTERN CAPE;NOTREPORTED		BANGANI S, 2022, J TRANSP SUPPLY CHAIN MANAG	BANGANI S, 2022, J TRANSP SUPPLY CHAIN MANAG	SOUTH AFRICA	BANGANI S, 2022,	wos
NA N				IEEE PUNE SECT. INT. CONF., PUNECON	THE PROCEEDINGS CONTAIN 61 PAPERS. THE TOPICS DISCUSSED INCLUDE: FLYING AD HOC NETWORK (FANET): OPPORTUNITIES, TRENDING APPLICATIONS AND SIMULATORS; REAL TIME NETWORK INTRUSION DETECTION USING MACHINE LEARNING TECHNIQUE; REAL ESTATE PRICE PREDICTION USING SUPERVISED LEARNING; CATEGORIZATION OF NUTRITIONAL DEFICIENCIES IN PLANTS WITH RANDOM FOREST; AN ALGORITHM FOR AUTO-THRESHOLD FOR MOUTH ROI; A …				2022 IEEE PUNE SECTION INTERNATIONAL CONFERENCE, PUNECON 2022	ENGLISH	0		INSTITUTE OF ELECTRICAL AND ELECTRONICS ENGINEERS INC.	ISI	2022 IEEE PUNE SECTION INTERNATIONAL CONFERENCE PUNECON 2022	CONFERENCE REVIEW		2022		IEEE PUNE SECT INT CONF, PUNECON	none		NOTREPORTED		NA NA, 2022, IEEE PUNE SECT INT CONF, PUNECON	NA NA, 2022, IEEE PUNE SECT INT CONF, PUNECON		NA NA, 2022, IEEE PUNE SECT INT CONF,	wos
KRAUS K;KRAUS N;HRYHORKIV M;KUZMUK I;SHTEPA O	ARTIFICIAL INTELLIGENCE; CLOUD TECHNOLOGIES; DIGITAL TRANSFORMATION; DIGITIZATION OF BUSINESS PROCESSES; FOURTH INDUSTRIAL REVOLUTION; INDUSTRY 4.0; INTELLIGENT SOLUTIONS		DEPARTMENT OF MANAGEMENT, BORYS GRINCHENKO KYIV UNIVERSITY, KYIV, 18/2 BULVARNO-KUDRIAVSKA ST., KYIV, UKRAINE; DEPARTMENT OF FINANCE AND ECONOMICS, BORYS GRINCHENKO KYIV UNIVERSITY, KYIV, 18/2 BULVARNO-KUDRIAVSKA ST., KYIV, UKRAINE; DEPARTMENT OF BUSINESS INFORMATICS AND ECONOMIC MODELLING, YURIY FEDKOVYCH CHERNIVTSI NATIONAL UNIVERSITY, CHERNIVTSI, 2 KOCYUBYNSKOGO ST., KYIV, UKRAINE; DEPARTMENT …	WSEAS TRANS. BUSI. ECON.	THE PURPOSE OF SCIENTIFIC RESEARCH IS TO PRESENT THE FEATURES OF DIGITIZATION OF BUSINESS PROCESSES USING ARTIFICIAL INTELLIGENCE AT ENTERPRISES AS A FOUNDATION ON WHICH THE GRADUAL FORMATION OF INDUSTRY 4.0 IS BUILT AND THE SEARCH FOR RESERVES OF SOCIO-ECONOMIC GROWTH IN THE CONDITIONS OF THE DEVELOPMENT OF DIGITAL ECOSYSTEM AND DIGITAL ENTREPRENEURSHIP. PRESENTATION OF A NUMBER OF POSITIVE AND …		10.37394/23207.2022.19.170	11099526	WSEAS TRANSACTIONS ON BUSINESS AND ECONOMICS	ENGLISH	7		WORLD SCIENTIFIC AND ENGINEERING ACADEMY AND SOCIETY	ISI	ARTIFICIAL INTELLIGENCE IN ESTABLISHED OF INDUSTRY 40	ARTICLE	19	2022	KRAUS KATERYNA;KRAUS NATALIIA;HRYHORKIV MARIIA;KUZMUK IHOR;SHTEPA OLENA	WSEAS TRANS BUSI ECON	none	BORYS GRINCHENKO KYIV UNIVERSITY;BORYS GRINCHENKO KYIV UNIVERSITY;YURIY FEDKOVYCH CHERNIVTSI NATIONAL UNIVERSITY;YURIY FEDKOVYCH CHERNIVTSI NATIONAL UNIVERSITY	BORYS GRINCHENKO KYIV UNIVERSITY;BORYS GRINCHENKO KYIV UNIVERSITY;YURIY FEDKOVYCH CHERNIVTSI NATIONAL UNIVERSITY;YURIY FEDKOVYCH CHERNIVTSI NATIONAL UNIVERSITY		KRAUS K, 2022, WSEAS TRANS BUSI ECON	KRAUS K, 2022, WSEAS TRANS BUSI ECON	UKRAINE	KRAUS K, 2022,	wos
NGUYEN H;NGUYEN N	CONSUMER BEHAVIOR; CONSUMERS; E-WALLETS; PAYMENTS		THU DAU MOT UNIVERSITY, BINH DUONG, VIET NAM	POL. J. MANAG. STUD.	CRYPTOCURRENCY HAS BEEN GROWING AND GRADUALLY ACCEPTED IN PAYMENT TRANSACTIONS. THEREFORE, E-WALLETS WERE CREATED TO MEET THE PAYMENT NEEDS OF CONSUMERS. NEVERTHELESS, THE FACTORS AFFECTING CONSUMER BEHAVIOR IN SWITCHING TO USING E-WALLETS IN PAYMENT NEED FURTHER INVESTIGATION. THIS STUDY AIMS TO DETERMINE THE FACTORS AFFECTING THE CONSUMER BEHAVIOR OF SWITCHING TO E-WALLETS IN PAYMENT ACTIVITIES…	N.T. NGUYEN; THU DAU MOT UNIVERSITY, BINH DUONG, VIET NAM; EMAIL: TIENNN@TDMU.EDU.VN	10.17512/pjms.2022.25.1.18	20817452	POLISH JOURNAL OF MANAGEMENT STUDIES	ENGLISH	3	1	CZESTOCHOWA UNIVERSITY OF TECHNOLOGY	ISI	IDENTIFYING THE FACTORS AFFECTING THE CONSUMER BEHAVIOR IN SWITCHING TO EWALLETS IN PAYMENT ACTIVITIES IDENTYFIKACJA CZYNNIKÓW WPŁYWAJĄCYCH NA ZACHOWANIA KONSUMENTÓW PRZY PRZEJŚCIU NA EPORTFELA W DZIAŁALNOŚCI PŁATNICZEJ	ARTICLE	25	2022	NGUYEN HONG THU;NGUYEN NGOC TIEN	POL J MANAG STUD	none	THU DAU MOT UNIVERSITY	NOTREPORTED;THU DAU MOT UNIVERSITY;NOTREPORTED		NGUYEN HT, 2022, POL J MANAG STUD	NGUYEN HT, 2022, POL J MANAG STUD		NGUYEN HT, 2022,	wos
GUSFEI A;PRADANA M	E-WALLET; FINANCIAL SERVICE; FINTECH; MOBILE PAYMENT		TELKOM UNIVERSITY, INDONESIA	RES MIL.	MOBILE PAYMENTS ARE EXPECTED TO PROVIDE OPPORTUNITIES FOR THE COMMUNITY TO BE INVOLVED IN THE ADVANCEMENT OF THE DIGITAL ECONOMY. IN ADDITION, THE PUBLIC IS EXPECTED TO BE ABLE TO EXPERIENCE THE BENEFITS OF USING MOBILE PAYMENTS, SUCH AS FASTER TRANSACTIONS, CHEAPER TRANSACTION FEES, AND SUPPORT FOR FINANCIAL LITERACY. THIS RESEARCH AIMS TO OBSERVE THE INTERVENING EFFECT OF E-CUSTOMER SATISFACTIO…			22656294	RES MILITARIS	ENGLISH	4	2	ASSOCIATION RES MILITARIS	ISI	THE EFFECT OF ESERVICE QUALITY AND ETRUST ON MOBILE PAYMENT APPLICATION ECUSTOMER LOYALTY THROUGH ECUSTOMER SATISFACTION AS INTERVENING VARIABLE	ARTICLE	12	2022	GUSFEI AKMAL DAVID;PRADANA MAHIR	RES MIL	none	TELKOM UNIVERSITY	TELKOM UNIVERSITY		GUSFEI AD, 2022, RES MIL	GUSFEI AD, 2022, RES MIL	INDONESIA	GUSFEI AD, 2022,	wos
KABIR H			EAST WEST UNIVERSITY, BANGLADESH	RES. ANTHOL. ON BUS. CONTIN. AND NAVIG. TIMES OF CRISIS	FINANCIAL INNOVATION AND FINANCIAL INCLUSION ARE HELPING COUNTRIES TO ACHIEVE INCLUSIVE ECONOMIC GROWTH BY MITIGATING POVERTY. THE PURPOSE OF THE CHAPTER IS TO EXAMINE HOW FINANCIAL INNOVATION ACCELERATING FINANCIAL INCLUSION IN SOUTH ASIAN COUNTRIES. THE USES OF INTERNET BANKING, MOBILE BANKING, SHORT MESSAGE SERVICE (SMS) BANKING, ELECTRONIC BANKING (E-BANKING), AGENT BANKING, MOBILE MONEY ACCO…		10.4018/978-1-6684-4503-7.ch075		RESEARCH ANTHOLOGY ON BUSINESS CONTINUITY AND NAVIGATING TIMES OF CRISIS	ENGLISH	4		IGI GLOBAL	ISI	FINANCIAL INNOVATION ACCELERATING FINANCIAL INCLUSION IN SOUTH ASIA	BOOK CHAPTER	1-2	2022	KABIR HUMAYUN	RES ANTHOL ON BUS CONTIN AND NAVIG TIMES OF CRISIS	none	EAST WEST UNIVERSITY	EAST WEST UNIVERSITY		KABIR H, 2022, RES ANTHOL ON BUS CONTIN AND NAVIG TIMES OF CRISIS	KABIR H, 2022, RES ANTHOL ON BUS CONTIN AND NAVIG TIMES OF CRISIS	BANGLADESH	KABIR H, 2022,	wos
FIRDAUS T;LUBIS M	CASHLESS PAYMENT; ELECTRONIC WALLET; PAYMENT METHODS	CONSUMER BEHAVIOR; ELECTRONIC MONEY; QUALITY OF SERVICE; BUSINESS OPERATION; CASHLESS PAYMENT; COMPARATIVE ANALYZES; DAILY LIVES; DIGITAL TRANSFORMATION; ELECTRONIC WALLET; INDONESIA; PAYMENT METHODS; PRIMARY DATA; SECONDARY DATUM; NETWORK SECURITY	SCHOOL OF INDUSTRIAL AND SYSTEM ENGINEERING, TELKOM UNIVERSITY, INDONESIA	ACM INT. CONF. PROC. SER.	THE AGE OF DIGITAL TRANSFORMATION HAS PROFOUND EFFECTS ON BUSINESSES' OPERATIONS AND CONSUMER BEHAVIOR. PAYMENT THROUGH AN ELECTRONIC WALLET, WHICH IS ONE OF THE SOLUTIONS TO DIGITIZE CONSUMER PAYABLES AND CORPORATE RECEIVABLES, IS INCREASINGLY POPULAR GLOBALLY. AN ELECTRONIC WALLET (E-WALLET) IS AN ELECTRONIC SERVICE THAT STORES PAYMENT DATA SUCH AS CARDS AND ELECTRONIC PAYMENTS (E-MONEY), WHICH…		10.1145/3568834.3568865		ACM INTERNATIONAL CONFERENCE PROCEEDING SERIES	ENGLISH	0		ASSOCIATION FOR COMPUTING MACHINERY	ISI	COMPARATIVE ANALYSIS OF POPULAR ELECTRONIC WALLETS IN INDONESIA IN DAILY LIFE SELECTION	CONFERENCE PAPER		2022	FIRDAUS TAUFIQ MAULANA;LUBIS MUHARMAN	ACM INT CONF PROC SER	none	TELKOM UNIVERSITY	TELKOM UNIVERSITY		FIRDAUS TM, 2022, ACM INT CONF PROC SER	FIRDAUS TM, 2022, ACM INT CONF PROC SER	INDONESIA	FIRDAUS TM, 2022,	wos
SHEKHAR R;JAIDEV U	MOBILE WALLET PAYMENT SERVICE; MULTI-GROUP ANALYSIS; STRUCTURAL EQUATION MODELLING; TECHNOLOGY ACCEPTANCE MODEL		VIT BUSINESS SCHOOL, VELLORE INSTITUTE OF TECHNOLOGY, TAMIL NADU, VELLORE, 632014, INDIA	INT. J. APPL. MANAGE. SCI.	THE RESEARCH AIM IS TO DETERMINE THE FACTORS INFLUENCING THE MOBILE WALLET ADOPTION. CONSTRUCTS NAMELY PERSONAL INNOVATIVENESS, PERCEIVED ENJOYMENT, AND PERCEIVED SELF-EFFICACY WERE INCLUDED IN THE TECHNOLOGY ACCEPTANCE MODEL. THE EFFECT OF THE PERSONAL INNOVATIVENESS, PERCEIVED ENJOYMENT, PERCEIVED USEFULNESS, PERCEIVED EASE OF USE, AND ATTITUDE TOWARDS USING WERE EXAMINED. AGE, GENDER, USAGE, A…	U.P. JAIDEV; VIT BUSINESS SCHOOL, VELLORE INSTITUTE OF TECHNOLOGY, VELLORE, TAMIL NADU, 632014, INDIA; EMAIL: UMAPRICILDA.J@VIT.AC.IN	10.1504/ijams.2022.125126	17558913	INTERNATIONAL JOURNAL OF APPLIED MANAGEMENT SCIENCE	ENGLISH	1	3	INDERSCIENCE PUBLISHERS	ISI	INTENTION TO USE MOBILE WALLETS AN APPLICATION OF THE TECHNOLOGY ACCEPTANCE MODEL	ARTICLE	14	2022	SHEKHAR RISHABH;JAIDEV UMA PRICILDA	INT J APPL MANAGE SCI	none	VIT BUSINESS SCHOOL	NOTREPORTED;VIT BUSINESS SCHOOL;NOTREPORTED		SHEKHAR R, 2022, INT J APPL MANAGE SCI	SHEKHAR R, 2022, INT J APPL MANAGE SCI	INDIA	SHEKHAR R, 2022,	wos
RENDUCHINTALA T;ALFAURI H;YANG Z;PIETRO R;JAIN R	BITCOIN; BLOCKCHAIN; DEPOSITS AND LENDING; DIGITAL WALLET; ETHEREUM; FINANCIAL SERVICES; FINTECH; HYPERLEDGER; PAYMENT SERVICES; SMART CONTRACT		ELECTRICAL AND COMPUTER ENGINEERING DEPARTMENT, UNIVERSITY OF SOUTHERN CALIFORNIA, LOS ANGELES, 90007, CA, UNITED STATES; COMPUTER SCIENCE AND ENGINEERING DEPARTMENT, WASHINGTON UNIVERSITY SAINT LOUIS, ST. LOUIS, 63130, MO, UNITED STATES; SCIENCE AND ENGINEERING DEPARTMENT, HAMAD BIN KHALIFA UNIVERSITY, AR-RAYYAN, 5825, QATAR	J. OPEN INNOV.: TECHNOL. MARK. COMPLEX.	FINTECH HAS PROVEN ITS TRUE POTENTIAL IN TRADITIONAL FINANCIAL OFFERINGS BY DELIVERING DIGITAL FINANCIAL SERVICES TO INDIVIDUALS WORLDWIDE. THE PANDEMIC HAS ACCELERATED HOW PEOPLE INTERACT WITH FINANCIAL SERVICES AND HAS RESULTED IN LONG-TERM CHANGES TO SOCIETIES AND ECONOMIES. FINTECH HAS EXPANDED ACCESS TO FINANCIAL SERVICES AND HAS MADE SUCH CHANGES POSSIBLE. FINTECH OR FINANCIAL TECHNOLOGY RE…	H. ALFAURI; COMPUTER SCIENCE AND ENGINEERING DEPARTMENT, WASHINGTON UNIVERSITY SAINT LOUIS, ST. LOUIS, 63130, UNITED STATES; EMAIL: A.HANEEN@WUSTL.EDU	10.3390/joitmc8040185	21998531	JOURNAL OF OPEN INNOVATION: TECHNOLOGY, MARKET, AND COMPLEXITY	ENGLISH	23	4	MULTIDISCIPLINARY DIGITAL PUBLISHING INSTITUTE (MDPI)	ISI	A SURVEY OF BLOCKCHAIN APPLICATIONS IN THE FINTECH SECTOR	REVIEW	8	2022	RENDUCHINTALA TARA;ALFAURI HANEEN;YANG ZEBO;PIETRO ROBERTO DI;JAIN RAJ	J OPEN INNOV: TECHNOL MARK COMPLEX	none	UNIVERSITY OF SOUTHERN CALIFORNIA;WASHINGTON UNIVERSITY SAINT LOUIS;HAMAD BIN KHALIFA UNIVERSITY	NOTREPORTED;WASHINGTON UNIVERSITY SAINT LOUIS;NOTREPORTED		RENDUCHINTALA T, 2022, J OPEN INNOV: TECHNOL MARK COMPLEX	RENDUCHINTALA T, 2022, J OPEN INNOV: TECHNOL MARK COMPLEX	QATAR	RENDUCHINTALA T, 2022,	wos
JAISWAL D;KAUSHAL V;MOHAN A;THAICHON P	CONTINUANCE INTENTION; EXPECTATION-CONFIRMATION MODEL (ECM); INDIVIDUAL MOBILITY; MOBILE WALLETS (M-WALLETS) ADOPTION; UNIFIED THEORY OF ACCEPTANCE AND USE OF TECHNOLOGY (UTAUT); USER SATISFACTION		INSTITUTE OF MANAGEMENT STUDIES, BANARAS HINDU UNIVERSITY, VARANASI, INDIA; INDIAN INSTITUTE OF MANAGEMENT SIRMAUR, PAONTA SAHIB, INDIA; DEPARTMENT OF MARKETING, GRIFFITH UNIVERSITY, BRISBANE, AUSTRALIA	MARK. INTELL. PLANN.	PURPOSE: THE MAIN OBJECTIVES OF THIS STUDY ARE (1) TO IDENTIFY THE DETERMINANTS OF PRE- AND POST-ADOPTION DYNAMICS OF MOBILE WALLETS (M-WALLETS) USAGE; (2) TO PROPOSE AND TEST THE LINKAGE FRAMEWORK OF PRE-ADOPTION AND POST-ADOPTION DYNAMICS TO UNDERSTAND CONSUMERS' PSYCHE OF M-WALLETS USAGE AND (3) TO EXAMINE THE MODERATION OF SELECT DEMOGRAPHIC VARIABLES IN THE PATH OF CONSUMERS' CONTINUED USAGE…	P. THAICHON; DEPARTMENT OF MARKETING, GRIFFITH UNIVERSITY, BRISBANE, AUSTRALIA; EMAIL: P.THAICHON@GRIFFITH.EDU.AU	10.1108/MIP-12-2021-0466	02634503	MARKETING INTELLIGENCE AND PLANNING	ENGLISH	25	5	EMERALD GROUP HOLDINGS LTD.	ISI	MOBILE WALLETS ADOPTION PRE AND POSTADOPTION DYNAMICS OF MOBILE WALLETS USAGE	ARTICLE	40	2022	JAISWAL DEEPAK;KAUSHAL VIKRANT;MOHAN ASHUTOSH;THAICHON PARK	MARK INTELL PLANN	none	BANARAS HINDU UNIVERSITY;INDIAN INSTITUTE OF MANAGEMENT SIRMAUR;GRIFFITH UNIVERSITY	NOTREPORTED;GRIFFITH UNIVERSITY;NOTREPORTED		JAISWAL D, 2022, MARK INTELL PLANN	JAISWAL D, 2022, MARK INTELL PLANN	AUSTRALIA	JAISWAL D, 2022,	wos
BAILEY A;BONIFIELD C;ARIAS A;VILLEGAS J	LATIN AMERICA; MOBILE PAYMENT; PERFORMANCE EXPECTANCY; TECHNOLOGY ADOPTION; UTAUT2		DEPARTMENT OF MARKETING AND INTERNATIONAL BUSINESS, COLLEGE OF BUSINESS AND INNOVATION, UNIVERSITY OF TOLEDO, TOLEDO, OH, UNITED STATES; GROSSMAN SCHOOL OF BUSINESS, UNIVERSITY OF VERMONT, BURLINGTON, VT, UNITED STATES; DEPARTMENT OF MARKETING, UNIVERSIDAD EAFIT, MEDELLIN, COLOMBIA	J. SERV. RES.	PURPOSE: SERVICE PROVIDERS HAVE A VESTED INTEREST IN ENHANCING ADOPTION OF TECHNOLOGIES THAT IMPROVE THE CUSTOMER SERVICE EXPERIENCE. BUOYED BY THIS IDEA, THIS PAPER AIMS TO EXPLORE LATIN AMERICAN CONSUMERS’ MOBILE PAYMENT (MP) ADOPTION, CONCEPTUALIZED AS BANK-SPONSORED MOBILE WALLETS THAT FACILITATE PAYMENT AT THE POINT-OF-PURCHASE. THIS PAPER APPLIES A REVISED UNIFIED THEORY OF ACCEPTANCE AND U…	A.A. BAILEY; DEPARTMENT OF MARKETING AND INTERNATIONAL BUSINESS, COLLEGE OF BUSINESS AND INNOVATION, UNIVERSITY OF TOLEDO, TOLEDO, UNITED STATES; EMAIL: AINSWORTH.BAILEY@UTOLEDO.EDU	10.1108/JSM-04-2021-0130	08876045	JOURNAL OF SERVICES MARKETING	ENGLISH	26	8	EMERALD PUBLISHING	ISI	MOBILE PAYMENT ADOPTION IN LATIN AMERICA	ARTICLE	36	2022	BAILEY AINSWORTH ANTHONY;BONIFIELD CAROLYN M;ARIAS ALEJANDRO;VILLEGAS JULIANA	J SERV RES	none	UNIVERSITY OF TOLEDO;UNIVERSITY OF VERMONT;UNIVERSIDAD EAFIT	NOTREPORTED;UNIVERSITY OF TOLEDO;NOTREPORTED		BAILEY AA, 2022, J SERV RES	BAILEY AA, 2022, J SERV RES	COLOMBIA	BAILEY AA, 2022,	wos
DOWSLEY R;FARIAS M;LARANGEIRA M;NASCIMENTO A;VIRDEE J	BLOCKCHAIN; CRYPTOCURRENCY; DIGITAL WALLET; QR CODE		FACULTY OF INFORMATION TECHNOLOGY, MONASH UNIVERSITY, MELBOURNE, AUSTRALIA; DEPARTMENT OF ELECTRICAL ENGINEERING, UNIVERSIDADE DE BRASÍLIA, BRASILIA, BRAZIL; DEPARTMENT OF MATHEMATICAL AND COMPUTING SCIENCE, TOKYO INSTITUTE OF TECHNOLOGY/IOHK, TOKYO, JAPAN; SCHOOL OF ENGINEERING AND TECHNOLOGY, UNIVERSITY OF WASHINGTON, TACOMA, UNITED STATES	INT. CONF. SEC. CRYPTOGR. SECRYPT	HOT/COLD WALLET REFERS TO A WIDELY USED PARADIGM TO ENHANCE THE SECURITY LEVEL OF CRYPTOCURRENCY APPLICATIONS THAT WAS PROPOSED ON BITCOIN IMPROVEMENT PROPOSAL 32. IN A NUTSHELL, AFTER PERFORMING AN INITIAL SETUP IN WHICH THE HOT WALLET RECEIVES PARTIAL INFORMATION OF THE COLD WALLET IN ORDER TO HIERARCHICALLY GENERATE (TRANSACTION RECEIVING) ADDRESSES, THE COLD WALLET STAYS OFFLINE, WHEREAS THE …		10.5220/0011138300003283	21847711	PROCEEDINGS OF THE INTERNATIONAL CONFERENCE ON SECURITY AND CRYPTOGRAPHY	ENGLISH	0		SCIENCE AND TECHNOLOGY PUBLICATIONS, LDA	ISI	A SPENDABLE COLD WALLET FROM QR VIDEO	CONFERENCE PAPER	1	2022	DOWSLEY RAFAEL;FARIAS MYLÈNE C Q;LARANGEIRA MARIO;NASCIMENTO ANDERSON;VIRDEE JOT	INT CONF SEC CRYPTOGR SECRYPT	none	MONASH UNIVERSITY;UNIVERSIDADE DE BRASÍLIA;TOKYO INSTITUTE OF TECHNOLOGY/IOHK;UNIVERSITY OF WASHINGTON	MONASH UNIVERSITY;UNIVERSIDADE DE BRASÍLIA;TOKYO INSTITUTE OF TECHNOLOGY/IOHK;UNIVERSITY OF WASHINGTON		DOWSLEY R, 2022, INT CONF SEC CRYPTOGR SECRYPT	DOWSLEY R, 2022, INT CONF SEC CRYPTOGR SECRYPT	USA	DOWSLEY R, 2022,	wos
ASTARI A;YASA N;SUKAATMADJA I;GIANTARI I	ATTITUDE TOWARD USING; BEHAVIORAL INTENTION TO USE; E-WALLET; FEAR OF COVID-19; TECHNOLOGY ACCEPTED MODEL (TAM)		ECONOMICS AND BUSINESS FACULTY, UDAYANA UNIVERSITY, INDONESIA	INT. J. DATA NETW. SCI.	E-WALLET USAGE IN TRANSACTIONS DURING THE COVID-19 PANDEMIC IS A CASHLESS MOVEMENT THAT SUPPORTS BREAKING THE CHAIN OF TRANSMISSION OF THE COVID-19 VIRUS. INTENTION TO USE E-WALLET DURING THE PANDEMIC IS HIGH DUE TO THE STAY-AT-HOME RECOMMENDATION THAT WAS ENFORCED SINCE THE BEGINNING OF THE BREAKDOWN OF THE FIRST CASE IN INDONESIA. SEVERAL STUDIES ON TECHNOLOGY ACCEPTANCE HAVE BEEN CARRIED OUT A…	A.A.E. ASTARI; ECONOMICS AND BUSINESS FACULTY, UDAYANA UNIVERSITY, INDONESIA; EMAIL: ELIK.ADOENKU@GMAIL.COM	10.5267/j.ijdns.2022.5.008	25618148	INTERNATIONAL JOURNAL OF DATA AND NETWORK SCIENCE	ENGLISH	11	4	GROWING SCIENCE	ISI	INTEGRATION OF TECHNOLOGY ACCEPTANCE MODEL TAM AND THEORY OF PLANNED BEHAVIOR TPB AN EWALLET BEHAVIOR WITH FEAR OF COVID19 AS A MODERATOR VARIABLE	ARTICLE	6	2022	ASTARI ANAK AGUNG ELIK;YASA NI NYOMAN KERTI;SUKAATMADJA I PUTU GDE;GIANTARI I GUSTI AYU KETUT	INT J DATA NETW SCI	none	UDAYANA UNIVERSITY	NOTREPORTED;UDAYANA UNIVERSITY;NOTREPORTED		ASTARI AAE, 2022, INT J DATA NETW SCI	ASTARI AAE, 2022, INT J DATA NETW SCI	INDONESIA	ASTARI AAE, 2022,	wos
FOSSO W S	ADOPTION; CAMEROON; COVID-19; FUN TO USE; INTENTION; MOBILE WALLET; MULTI-GROUPS ANALYSIS; TAM		TBS EDUCATION, TOULOUSE, FRANCE	LECT. NOTES NETWORKS SYST.	THIS STUDY DEVELOPS AND TESTS A MODIFIED TECHNOLOGY ACCEPTANCE MODEL (TAM) TO ASSESS CAMEROON'S KEY DETERMINANTS OF MOBILE WALLET (M-WALLET) ADOPTION. THE PROPOSED RESEARCH MODEL IS TESTED USING A LONGITUDINAL APPROACH WITH DATA COLLECTED IN TWO PHASES: DECEMBER 2019 FOR THE FIRST PHASE AND MARCH AND APRIL 2021 FOR THE SECOND PHASE DURING THE COVID-19. DATA ANALYSIS WAS REALIZED USING THE PARTIAL…	S. FOSSO WAMBA; TBS EDUCATION, TOULOUSE, FRANCE; EMAIL: S.FOSSO-WAMBA@TBS-EDUCATION.FR	10.1007/978-3-031-04819-7_4	23673370	LECTURE NOTES IN NETWORKS AND SYSTEMS	ENGLISH	0		SPRINGER SCIENCE AND BUSINESS MEDIA DEUTSCHLAND GMBH	ISI	DETERMINANTS OF MOBILE WALLET ADOPTION A LONGITUDINAL APPROACH APPLYING AN EXTENSION OF THE TECHNOLOGY ACCEPTANCE MODEL IN CAMEROON	CONFERENCE PAPER	469 LNNS	2022	FOSSO WAMBA SAMUEL	LECT NOTES NETWORKS SYST	none		NOTREPORTED;NOTREPORTED;NOTREPORTED		FOSSO WAMBA S, 2022, LECT NOTES NETWORKS SYST	FOSSO WAMBA S, 2022, LECT NOTES NETWORKS SYST	FRANCE	FOSSO WAMBA S, 2022,	wos
ADDANY A;PRADANA N;PUTRA P S;WIDIATI I	DESIGN THINKING; E-WALLET; UI/UX DESIGN	SOFTWARE PROTOTYPING; USER EXPERIENCE; DESIGN THINKING; DIGITAL WALLETS; E-WALLET; ELECTRONIC PAYMENT; MILLENNIALS; ON-LINE GAMES; ONLINE TRANSACTION; PAYMENT INSTRUMENT; UI/UX DESIGN; USERS' EXPERIENCES; ELECTRONIC MONEY	INFORMATICS, STMIK AMIKOM SURAKARTA, INDONESIA	INT. CONF. CYBERN. INTELL. SYST., ICORIS	ALONG WITH THE DEVELOPMENT OF THE TIMES, NEW INNOVATIONS IN PAYMENT INSTRUMENTS IN THE FORM OF ELECTRONIC MONEY ARE UNIQUE AND VERY DIFFERENT FROM PAYMENT INSTRUMENTS USING CARDS. THE INCREASING GROWTH OF ONLINE TRANSACTIONS HAS LED TO THE EMERGENCE OF VARIOUS NEW TECHNOLOGIES, ONE OF WHICH IS A DIGITAL WALLET. THE DEVELOPMENT OF ELECTRONIC PAYMENT TOOLS STARTING FROM PULSES AND ONLINE GAME VOUCH…		10.1109/ICORIS56080.2022.10031309		2022 4TH INTERNATIONAL CONFERENCE ON CYBERNETICS AND INTELLIGENT SYSTEM, ICORIS 2022	ENGLISH	2		INSTITUTE OF ELECTRICAL AND ELECTRONICS ENGINEERS INC.	ISI	UIUX DESIGN OF EWALLET APPLLICATION USING DESIGN THINKING APPROACH	CONFERENCE PAPER		2022	ADDANY ASAD SYAFRIZAL;PRADANA NANDA IHSAN;PUTRA PRABOWO SATRIA PERDANA;WIDIATI INA SHOLIHAH	INT CONF CYBERN INTELL SYST, ICORIS	none		NOTREPORTED		ADDANY AS, 2022, INT CONF CYBERN INTELL SYST, ICORIS	ADDANY AS, 2022, INT CONF CYBERN INTELL SYST, ICORIS	INDONESIA	ADDANY AS, 2022, INT CONF CYBERN INTELL SYST,	wos
HIEW L;LEE H A;LEONG C;LIEW C;SOE M	COVID-19; E-WALLET; GOVERNMENT SUPPORT; HEALTH BELIEF MODEL; PERCEIVED SUSCEPTIBILITY; TAM		FACULTY OF BUSINESS AND MANAGEMENT, UCSI UNIVERSITY SARAWAK CAMPUS, MALAYSIA; FACULTY OF HOSPITALITY AND TOURISM MANAGEMENT, UCSI UNIVERSITY SARAWAK CAMPUS, MALAYSIA; UCSI GRADUATE BUSINESS SCHOOL, UCSI UNIVERSITY, KUALA LUMPUR CAMPUS, MALAYSIA; FACULTY OF BUSINESS AND MANAGEMENT, UCSI UNIVERSITY, KUALA LUMPUR CAMPUS, MALAYSIA; MALAYSIAN MEDICAL ASSOCIATION (MMA), KUALA LUMPUR, MALAYSIA	ASIAN J. BUS. RES.	THIS STUDY PROPOSED A NOVEL ATTEMPT TO EXPLAIN THE EFFECT OF GOVERNMENT SUPPORT AND INDIVIDUAL’S PERCEIVED SUSCEPTIBILITY TO COVID-19 IN ADOPTING E-WALLET BY INTEGRATING TECHNOLOGY ACCEPTANCE MODEL (TAM) AND HEALTH BELIEF MODEL (HBM). A TOTAL OF 232 VALID RESPONSES WERE COLLECTED THROUGH ONLINE SURVEY. THE HYPOTHESES WERE ANALYSED AND VALIDATED BY USING THE PARTIAL LEAST SQUARE STRUCTURAL EQUATIO…	L.-C. HIEW; FACULTY OF BUSINESS AND MANAGEMENT, UCSI UNIVERSITY SARAWAK CAMPUS, MALAYSIA; EMAIL: HIEWLC@UCSIUNIVERSITY.EDU.MY	10.14707/ajbr.220121	24634522	ASIAN JOURNAL OF BUSINESS RESEARCH	ENGLISH	8	1	ASIA BUSINESS RESEARCH CORPORATION	ISI	DO THEY REALLY INTEND TO ADOPT EWALLET PREVALENCE ESTIMATES FOR GOVERNMENT SUPPORT AND PERCEIVED SUSCEPTIBILITY	ARTICLE	12	2022	HIEW LEE-CHEA;LEE HUNG ADRIAN;LEONG CHOI-MENG;LIEW CHEE-YOONG;SOE MIN-HTUT	ASIAN J BUS RES	none	UCSI UNIVERSITY SARAWAK CAMPUS;UCSI UNIVERSITY SARAWAK CAMPUS;UCSI UNIVERSITY;UCSI UNIVERSITY;MALAYSIAN MEDICAL ASSOCIATION (MMA)	NOTREPORTED;UCSI UNIVERSITY SARAWAK CAMPUS;EMAIL: HIEWLC@UCSIUNIVERSITY.EDU.MY		HIEW LC, 2022, ASIAN J BUS RES	HIEW LC, 2022, ASIAN J BUS RES	MALAYSIA	HIEW LC, 2022,	wos
NA N				INT. CONF. INF. TECHNOL. SYST. INNOV., ICITSI - PROC.	THE PROCEEDINGS CONTAIN 68 PAPERS. THE TOPICS DISCUSSED INCLUDE: THE INFLUENCE OF SOCIAL MEDIA MARKETING ON CONSUMER BEHAVIOR IN BRUNEI; ANALYSIS OF THE FREQUENCY SPECTRUM RENTING BUSINESS MODEL ON THE IMPLEMENTATION MICRO OPERATOR IN INDONESIA; COMBINING SERVICES COMPUTING SYSTEMS ENGINEERING FRAMEWORK AND SCRUM FOR AGILE DEVELOPMENT; MOBILE HEALTH APPLICATION SECURITY ASSESSMENT BASED ON OWASP …				2022 INTERNATIONAL CONFERENCE ON INFORMATION TECHNOLOGY SYSTEMS AND INNOVATION, ICITSI 2022 - PROCEEDINGS	ENGLISH	0		INSTITUTE OF ELECTRICAL AND ELECTRONICS ENGINEERS INC.	ISI	2022 INTERNATIONAL CONFERENCE ON INFORMATION TECHNOLOGY SYSTEMS AND INNOVATION ICITSI 2022 PROCEEDINGS	CONFERENCE REVIEW		2022		INT CONF INF TECHNOL SYST INNOV, ICITSI - PROC	none		NOTREPORTED		NA NA, 2022, INT CONF INF TECHNOL SYST INNOV, ICITSI - PROC	NA NA, 2022, INT CONF INF TECHNOL SYST INNOV, ICITSI - PROC		NA NA, 2022, INT CONF INF TECHNOL SYST INNOV,	wos
FARADINA H;WAHYUNINGRUM T;PRASETYO N;KRESNA A	E-WALLET; HEURISTIC EVALUATION; UMUX; USER EXPEIENCE; USER SATISFACTION	HEURISTIC METHODS; USABILITY ENGINEERING; USER EXPERIENCE; E-WALLET; EXPERT JUDGMENT; EXPERT USERS; HEURISTIC EVALUATION; UMUX; USABILITY MEASUREMENTS; USER EXPEIENCE; USER TESTING; USERS' EXPERIENCES; USERS' SATISFACTIONS; QUALITY OF SERVICE	INSTITUT TEKNOLOGI TELKOM PURWOKERTO, DEPARTMENT OF INFORMATICS, BANYUMAS, INDONESIA	PROC. - IEEE INT. CONF. CYBERN. COMPUT. INTELL., CYBERNETICSCOM	USABILITY IS THE LEVEL OF EASE OF USERS IN USING THE INTERFACE ON A SYSTEM. USABILITY CAN BE MEASURED USING EXPERT JUDGMENT OR USER TESTING. ONE OF THE TECHNIQUES IN USABILITY MEASUREMENT THAT CAN BE IS HEURISTIC EVALUATION (MEASURED BY THE EXPERT) AND USABILITY METRIC FOR USER EXPERIENCE OR AS KNOWN AS UMUX (MEASURED BY USER). HEURISTIC EVALUATION IS AN INTERFACE EVALUATION PROCESS THAT AIMS TO …		10.1109/CyberneticsCom55287.2022.9865427		PROCEEDINGS - 2022 IEEE INTERNATIONAL CONFERENCE ON CYBERNETICS AND COMPUTATIONAL INTELLIGENCE, CYBERNETICSCOM 2022	ENGLISH	3		INSTITUTE OF ELECTRICAL AND ELECTRONICS ENGINEERS INC.	ISI	USER EXPERIENCE ANALYSIS ON EWALLET USING A COMBINATION OF HEURISTIC EVALUATION AND UMUX	CONFERENCE PAPER		2022	FARADINA HAVINDA ROSITA;WAHYUNINGRUM TENIA;PRASETYO NOVIAN ADI;KRESNA A IQSYAHIRO	PROC - IEEE INT CONF CYBERN COMPUT INTELL, CYBERNETICSCOM	none	INSTITUT TEKNOLOGI TELKOM PURWOKERTO	INSTITUT TEKNOLOGI TELKOM PURWOKERTO		FARADINA HR, 2022, PROC - IEEE INT CONF CYBERN COMPUT INTELL, CYBERNETICSCOM	FARADINA HR, 2022, PROC - IEEE INT CONF CYBERN COMPUT INTELL, CYBERNETICSCOM	INDONESIA	FARADINA HR, 2022, PROC - IEEE INT CONF CYBERN COMPUT INTELL,	wos
WAMBA S;QUEIROZ M;BLOME C;SIVARAJAH U			TBS BUSINESS SCHOOL, FRANCE; PAULISTA UNIVERSITY, BRAZIL; MACKENZIE PRESBYTERIAN UNIVERSITY, BRAZIL; BUSINESS SCHOOL, UNIVERSITY OF SUSSEX, UNITED KINGDOM; FACULTY OF MANAGEMENT, LAW, AND SOCIAL SCIENCES, UNIVERSITY OF BRADFORD, UNITED KINGDOM	RES. ANTHOL. ON MICROFINANCE SERV. AND ROLES IN SOC. PROG.	FINANCIAL INCLUSION IS A VITAL DEVELOPMENT PRIORITY FOR COUNTRIES WORLDWIDE. MOBILE WALLET (M-WALLET) IS CONSIDERED AS A DISRUPTIVE PAYMENT METHOD THAT WILL SUBSTITUTE THE TRADITIONAL PHYSICAL WALLET TO ACHIEVE THE SO-CALLED CASHLESS SOCIETY AND ENABLES FINANCIAL INCLUSION. THIS STUDY AIMS AT DEVELOPING AND TESTING A RESEARCH MODEL THAT INTEGRATES A SET OF TECHNOLOGY FACTORS (PERCEIVED USEFULNESS…		10.4018/978-1-6684-7552-2.ch030		RESEARCH ANTHOLOGY ON MICROFINANCE SERVICES AND ROLES IN SOCIAL PROGRESS	ENGLISH	0		IGI GLOBAL	ISI	FOSTERING FINANCIAL INCLUSION IN A DEVELOPING COUNTRY PREDICTING USER ACCEPTANCE OF MOBILE WALLETS IN CAMEROON	BOOK CHAPTER		2022	WAMBA SAMUEL FOSSO;QUEIROZ MACIEL M;BLOME CONSTANTIN;SIVARAJAH UTHAYASANKAR	RES ANTHOL ON MICROFINANCE SERV AND ROLES IN SOC PROG	none	TBS BUSINESS SCHOOL;PAULISTA UNIVERSITY;MACKENZIE PRESBYTERIAN UNIVERSITY;UNIVERSITY OF SUSSEX;UNIVERSITY OF BRADFORD	TBS BUSINESS SCHOOL;PAULISTA UNIVERSITY;MACKENZIE PRESBYTERIAN UNIVERSITY;UNIVERSITY OF SUSSEX;UNIVERSITY OF BRADFORD		WAMBA SF, 2022, RES ANTHOL ON MICROFINANCE SERV AND ROLES IN SOC PROG	WAMBA SF, 2022, RES ANTHOL ON MICROFINANCE SERV AND ROLES IN SOC PROG	UNITED KINGDOM	WAMBA SF, 2022,	wos
ABBASI G;SANDRAN T;GANESAN Y;IRANMANESH M	MOBILE PAYMENT; PAYMENT SYSTEMS; POST-ADOPTION; QUALITY DIMENSIONS; S-O-R MODEL; USER BEHAVIOUR	BEHAVIORAL RESEARCH; ELECTRONIC MONEY; GLOBAL SYSTEM FOR MOBILE COMMUNICATIONS; MANAGERS; QUALITY OF SERVICE; CONTINUANCE INTENTIONS; FUZZY SET QUALITATIVE COMPARATIVE ANALYSIS; INTENTION TO USE; MOBILE PAYMENT; PAYMENT SYSTEMS; POST ADOPTIONS; QUALITY DIMENSION; R MODELS; S-O-R MODEL; USER BEHAVIORS; COMPUTER SIMULATION; FUZZY MATHEMATICS; INNOVATION; MOBILE PHONE; SCANNING ELECTRON MICROSCOPY; …	LABUAN FACULTY OF INTERNATIONAL FINANCE, UNIVERSITI MALAYSIA SABAH, LABUAN, MALAYSIA; GRADUATE SCHOOL OF BUSINESS, UNIVERSITI SAINS MALAYSIA, USM, PENANG, 11800, MALAYSIA; SCHOOL OF BUSINESS AND LAW, EDITH COWAN UNIVERSITY, ECU, JOONDALUP, 6027, AUSTRALIA	TECHNOL. SOC.	THIS STUDY AIMS TO EXAMINE THE INFLUENCE OF QUALITY AND CONFIRMATION DIMENSIONS ON USERS' CONTINUANCE INTENTIONS TO USE E-WALLET APPS. BESIDES THE PARTIAL LEAST SQUARES-STRUCTURAL EQUATION MODELING (PLS-SEM) TECHNIQUE, AN ASYMMETRICAL ANALYTICAL APPROACH THROUGH FUZZY SET QUALITATIVE COMPARATIVE ANALYSIS (FSQCA) WAS USED TO EXAMINE THE COMBINATION EFFECTS OF QUALITY DIMENSIONS AND CONFIRMATIONS O…	G.A. ABBASI; LABUAN FACULTY OF INTERNATIONAL FINANCE, UNIVERSITI MALAYSIA SABAH, LABUAN, MALAYSIA; EMAIL: GHAZANFAR.ABBASI@HOTMAIL.CO.UK; Y. GANESAN; GRADUATE SCHOOL OF BUSINESS, UNIVERSITI SAINS MALAYSIA, USM, PENANG, 11800, MALAYSIA; EMAIL: YUVARAJ@USM.MY	10.1016/j.techsoc.2022.101937	0160791X	TECHNOLOGY IN SOCIETY	ENGLISH	58		ELSEVIER LTD	ISI	GO CASHLESS DETERMINANTS OF CONTINUANCE INTENTION TO USE EWALLET APPS A HYBRID APPROACH USING PLSSEM AND FSQCA	ARTICLE	68	2022	ABBASI GHAZANFAR ALI;SANDRAN THIVIYA;GANESAN YUVARAJ;IRANMANESH MOHAMMAD	TECHNOL SOC	none	UNIVERSITI MALAYSIA SABAH;UNIVERSITI SAINS MALAYSIA;EDITH COWAN UNIVERSITY	NOTREPORTED;UNIVERSITI MALAYSIA SABAH;NOTREPORTED;NOTREPORTED;UNIVERSITI SAINS MALAYSIA;NOTREPORTED		ABBASI GA, 2022, TECHNOL SOC	ABBASI GA, 2022, TECHNOL SOC	AUSTRALIA	ABBASI GA, 2022,	wos
AJI H;ADAWIYAH W	DIGITAL WALLET; E-WALLETS; EXPLORATORY SEQUENTIAL; ILLUSION OF LIQUIDITY; MIXED METHOD; SPENDING; SPENDING BEHAVIOR; THE ILLUSION OF LIQUIDITY; YOUNG ADULTS; YOUNG CONSUMER		DEPARTMENT OF MANAGEMENT, FACULTY OF BUSINESS AND ECONOMICS, UNIVERSITAS ISLAM INDONESIA, YOGYAKARTA, INDONESIA; DEPARTMENT OF MANAGEMENT, FACULTY OF ECONOMICS AND BUSINESS, UNIVERSITAS JENDERAL SOEDIRMAN, PURWOKERTO, INDONESIA	J. ASIA BUS. STUD.	PURPOSE: AS IT GAINS MORE POPULARITY, E-WALLETS DRIVE ITS USERS TO SPEND MORE. THEREFORE, THE PURPOSE OF THIS PAPER IS TO EXPLORE HOW AND WHY E-WALLETS MAY ENCOURAGE EXCESSIVE SPENDING BEHAVIOR AMONG YOUNG ADULT CONSUMERS. DESIGN/METHODOLOGY/APPROACH: AN EXPLORATORY SEQUENTIAL OR QUAL-QUANT DESIGN, COMBINING QUALITATIVE AND QUANTITATIVE, IS USED IN THIS STUDY. IT IS A TYPE OF MIXED-METHOD DESIGN …	H.M. AJI; DEPARTMENT OF MANAGEMENT, FACULTY OF BUSINESS AND ECONOMICS, UNIVERSITAS ISLAM INDONESIA, YOGYAKARTA, INDONESIA; EMAIL: HM.AJI@UII.AC.ID	10.1108/JABS-01-2021-0025	15587894	JOURNAL OF ASIA BUSINESS STUDIES	ENGLISH	7	6	EMERALD PUBLISHING	ISI	HOW EWALLETS ENCOURAGE EXCESSIVE SPENDING BEHAVIOR AMONG YOUNG ADULT CONSUMERS	ARTICLE	16	2022	AJI HENDY MUSTIKO;ADAWIYAH WIWIEK RABIATUL	J ASIA BUS STUD	none	UNIVERSITAS ISLAM INDONESIA;UNIVERSITAS JENDERAL SOEDIRMAN	NOTREPORTED;UNIVERSITAS ISLAM INDONESIA;NOTREPORTED		AJI HM, 2022, J ASIA BUS STUD	AJI HM, 2022, J ASIA BUS STUD	INDONESIA	AJI HM, 2022,	wos
SANDBUKT S	DIGITAL PAYMENTS; MONEY; PEER-TO-PEER; SOCIAL INFRASTRUCTURE; VALUE		IT UNIVERSITY OF COPENHAGEN, COPENHAGEN, DENMARK	THE PALGRAVE HANDB. OF THE ANTHROPOLOGY OF TECHNOLOGY	THE TERM DIGITAL MONEY CAN BE USED TO DESCRIBE A WIDE VARIETY OF THINGS, RANGING FROM THE USE OF PHONE CREDITS TO CRYPTOCURRENCIES. FUNDAMENTALLY, DIGITAL MONEY DISTINGUISHES ITSELF FROM CASH IN THAT DIGITAL MONEY EXISTS AS DATA POINTS, THE RECORD OF WHICH IS KEPT AND MAINTAINED BY A VARIETY OF INTERMEDIARIES. THUS, WHERE PAYING WITH CASH INVOLVES MONEY CHANGING FROM HAND TO HAND, DIGITAL PAYMENT…	S. SANDBUKT; IT UNIVERSITY OF COPENHAGEN, COPENHAGEN, DENMARK; EMAIL: SUNS@ITU.DK	10.1007/978-981-16-7084-8_39		THE PALGRAVE HANDBOOK OF THE ANTHROPOLOGY OF TECHNOLOGY	ENGLISH	0		SPRINGER NATURE	ISI	CIRCUIT BOARD MONEY AN INFRASTRUCTURAL PERSPECTIVE ON DIGITAL PAYMENTS FINANCE	BOOK CHAPTER		2022	SANDBUKT SUNNIVA	THE PALGRAVE HANDB OF THE ANTHROPOLOGY OF TECHNOLOGY	none	IT UNIVERSITY OF COPENHAGEN	NOTREPORTED;IT UNIVERSITY OF COPENHAGEN;NOTREPORTED		SANDBUKT S, 2022, THE PALGRAVE HANDB OF THE ANTHROPOLOGY OF TECHNOLOGY	SANDBUKT S, 2022, THE PALGRAVE HANDB OF THE ANTHROPOLOGY OF TECHNOLOGY	DENMARK	SANDBUKT S, 2022,	wos
WOON C V;LAM J;TOO Y	E-WALLET; PERCEIVED EASE OF USE; PERCEIVED RISK; PERCEIVED USEFULNESS; SATISFACTION	ELECTRONIC MONEY; DIGITAL WALLETS; E-WALLET; EMPIRICAL STUDIES; GLOBAL ECONOMIES; INTENTION TO USE; MALAYSIA; PERCEIVED EASE-OF-USE; PERCEIVED RISK; PERCEIVED USEFULNESS; SATISFACTION; REGRESSION ANALYSIS	MULTIMEDIA UNIVERSITY, FACULTY OF BUSINESS, MELAKA, MALAYSIA	INT. CONF. DIGIT. TRANSFORM. INTELL., ICDI - PROC.	THE COVID-19 EPIDEMIC HAS WREAKED HAVOC ON THE GLOBAL ECONOMY INDEED, MALAYSIA WAS UNAVOIDABLE FROM THIS. NEVERTHELESS, THIS HAS CREATED A NEW TRANSFORMATION AND RENOVATION FOR THE FINTECH INDUSTRY TO DEVELOP TREMENDOUSLY. THE USERS OF DIGITAL WALLETS ARE ANTICIPATED TO GROW AND HASTENED THE SHIFT FROM PHYSICAL PAYMENT TO DIGITAL PAYMENT. TOUCH' N GO E-WALLET IS ONE OF THE FINTECH INNOVATION PLAT…		10.1109/ICDI57181.2022.10007416		2022 INTERNATIONAL CONFERENCE ON DIGITAL TRANSFORMATION AND INTELLIGENCE, ICDI 2022 - PROCEEDINGS	ENGLISH	0		INSTITUTE OF ELECTRICAL AND ELECTRONICS ENGINEERS INC.	ISI	EMPIRICAL STUDY ON INTENTION TO USE OF TOUCHN GO EWALLET AMONG MILLENNIAL IN MALAYSIA DURING COVID19 ENDEMIC	CONFERENCE PAPER		2022	WOON CHONG VENNY SIN;LAM JASON MS;TOO YUE JIA	INT CONF DIGIT TRANSFORM INTELL, ICDI - PROC	none	MULTIMEDIA UNIVERSITY	MULTIMEDIA UNIVERSITY		WOON CHONG VS, 2022, INT CONF DIGIT TRANSFORM INTELL, ICDI - PROC	WOON CHONG VS, 2022, INT CONF DIGIT TRANSFORM INTELL, ICDI - PROC	MALAYSIA	WOON CHONG VS, 2022, INT CONF DIGIT TRANSFORM INTELL,	wos
MAUGERI M	CRYPTO-ASSETS; INSIDE INFORMATION; MARKET ABUSE; REASONABLE HOLDER OF CRYPTO-ASSETS; UTILITY TOKENS		UNIVERSITÀ EUROPEA DI ROMA, VIA DEGLI ALDOBRANDESCHI 190, ROMA, 00163, ITALY	OSS. DIRIT. CIV. COMMER.	THE SPREAD OF CRYPTO-ASSETS AS A FORM OF FINANCIAL INVESTMENT RAISES THE NEED TO PROTECT THE MARKET INTEGRITY AND INVESTOR CONFIDENCE WHILE CONSIDERING THE PECULIARITIES OF THE DIGITAL ECOSYSTEM (SMART CONTRACTS, DIGITAL WALLETS, CRYPTOGRAPHIC KEYS, ETC.). ACCORDING TO SEVERAL EMPIRICAL STUDIES, DLT MAY FACILITATE THE CONSUMMATION OF MANIPULATIVE CONDUCTS THAT ARE ENTIRELY NEW AS TO THE NATURE OF…	M. MAUGERI; UNIVERSITÀ EUROPEA DI ROMA, ROMA, VIA DEGLI ALDOBRANDESCHI 190, 00163, ITALY; EMAIL: MARCO.MAUGERI@UNIER.IT	10.4478/106718	22812628	OSSERVATORIO DEL DIRITTO CIVILE E COMMERCIALE	ITALIAN	0		SOCIETA EDITRICE IL MULINO	ISI	CRIPTOASSETS AND MARKET ABUSE REGULATION CRIPTOATTIVITÀ E ABUSI DI MERCATO	ARTICLE	11	2022	MAUGERI MARCO	OSS DIRIT CIV COMMER	none	UNIVERSITÀ EUROPEA DI ROMA	NOTREPORTED;UNIVERSITÀ EUROPEA DI ROMA;NOTREPORTED		MAUGERI M, 2022, OSS DIRIT CIV COMMER	MAUGERI M, 2022, OSS DIRIT CIV COMMER	ITALY	MAUGERI M, 2022,	wos
HANDOKO B;KARMAWAN I;MELIANA L	CUSTOMER INTENTION; E-WALLET; PERCEIVED SECURITY; REWARDS; SHOPPEPAY	LINEAR REGRESSION; CUSTOMER INTENTIONS; DIGITAL WALLETS; E-WALLET; PAYMENT SYSTEMS; PAYMENT TRANSACTIONS; PERCEIVED SECURITIES; REWARD; SHOPPEPAY; TECHNOLOGICAL ADVANCEMENT; USERS' INTERESTS; SALES	ACCOUNTING DEPARTMENT, SCHOOL OF ACCOUNTING, BINA NUSANTARA UNIVERSITY, JAKARTA, INDONESIA; INFORMATION SYSTEM DEPARTMENT, SCHOOL OF INFORMATION SYSTEM, BINA NUSANTARA UNIVERSITY, JAKARTA, INDONESIA	INT. CONF. CYBERN. INTELL. SYST., ICORIS	THE VALUE OF TRANSACTIONS HAS INCREASED ALONG WITH THE DANGERS INVOLVED DUE TO TECHNOLOGICAL ADVANCEMENTS, BUT BECAUSE EACH DIGITAL WALLET APPLICATION PROVIDES A GUARANTEE OF THE PERFORMANCE OF THE PAYMENT SYSTEM, IT IS IN THE INTEREST OF INDONESIAN USERS TO SUPPORT THE GROWTH OF THE FINANCIAL SYSTEM BECAUSE THE COUNTRY DESPERATELY NEEDS A SECURE AND EFFICIENT PAYMENT SYSTEM. THIS STUDY'S GOAL WA…		10.1109/ICORIS56080.2022.10031472		2022 4TH INTERNATIONAL CONFERENCE ON CYBERNETICS AND INTELLIGENT SYSTEM, ICORIS 2022	ENGLISH	1		INSTITUTE OF ELECTRICAL AND ELECTRONICS ENGINEERS INC.	ISI	FACTORS INFLUENCED USER INTEREST IN PAYMENT TRANSACTION OF SHOPEEPAY DIGITAL WALLET APPLICATION	CONFERENCE PAPER		2022	HANDOKO BAMBANG LEO;KARMAWAN I GUSTI MADE;MELIANA LILIS	INT CONF CYBERN INTELL SYST, ICORIS	none	BINA NUSANTARA UNIVERSITY;BINA NUSANTARA UNIVERSITY	BINA NUSANTARA UNIVERSITY;BINA NUSANTARA UNIVERSITY		HANDOKO BL, 2022, INT CONF CYBERN INTELL SYST, ICORIS	HANDOKO BL, 2022, INT CONF CYBERN INTELL SYST, ICORIS	INDONESIA	HANDOKO BL, 2022, INT CONF CYBERN INTELL SYST,	wos
ALAMRI M;YKHLEF M	ANOMALY DETECTION; CLASS IMBALANCE; CREDIT CARD; FRAUD DETECTION; SAMPLING TECHNIQUES		INFORMATION SYSTEM DEPARTMENT, COLLEGE OF COMPUTER AND INFORMATION SCIENCES, KING SAUD UNIVERSITY, RIYADH, 11543, SAUDI ARABIA	ELECTRONICS (SWITZERLAND)	THE RAPID GROWTH IN E-COMMERCE HAS RESULTED IN AN INCREASING NUMBER OF PEOPLE SHOPPING ONLINE. THESE SHOPPERS DEPEND ON CREDIT CARDS AS A PAYMENT METHOD OR USE MOBILE WALLETS TO PAY FOR THEIR PURCHASES. THUS, CREDIT CARDS HAVE BECOME THE MAIN PAYMENT METHOD IN THE E-WORLD. GIVEN THE BILLIONS OF TRANSACTIONS THAT OCCUR DAILY, CRIMINALS SEE TREMENDOUS OPPORTUNITIES TO BE GAINED FROM FINDING DIFFERE…	M. ALAMRI; INFORMATION SYSTEM DEPARTMENT, COLLEGE OF COMPUTER AND INFORMATION SCIENCES, KING SAUD UNIVERSITY, RIYADH, 11543, SAUDI ARABIA; EMAIL: MAALAMRI@KSU.EDU.SA	10.3390/electronics11234003	20799292	ELECTRONICS (SWITZERLAND)	ENGLISH	8	23	MDPI	ISI	SURVEY OF CREDIT CARD ANOMALY AND FRAUD DETECTION USING SAMPLING TECHNIQUES	REVIEW	11	2022	ALAMRI MARAM;YKHLEF MOURAD	ELECTRONICS (SWITZERLAND)	none	KING SAUD UNIVERSITY	NOTREPORTED;KING SAUD UNIVERSITY;NOTREPORTED		ALAMRI M, 2022, ELECTRONICS (SWITZERLAND)	ALAMRI M, 2022, ELECTRONICS (SWITZERLAND)	SAUDI ARABIA	ALAMRI M, 2022,	wos
FEULNER S;SEDLMEIR J;SCHLATT V;URBACH N	BOT PREVENTION; DIGITAL IDENTITY MANAGEMENT; DIGITAL WALLET; SECONDARY MARKET CONTROL; TICKET SCALPING; VERIFIABLE CREDENTIALS		BRANCH BUSINESS & INFORMATION SYSTEMS ENGINEERING, FRAUNHOFER INSTITUTE FOR APPLIED INFORMATION TECHNOLOGY FIT, WITTELSBACHERRING 10, BAYREUTH, 95447, GERMANY; FIM RESEARCH CENTER, UNIVERSITY OF BAYREUTH, WITTELSBACHERRING 10, BAYREUTH, 95447, GERMANY; DITLAB, FRANKFURT UNIVERSITY OF APPLIED SCIENCES, HUNGENER STRAßE 6, FRANKFURT, 60389, GERMANY	ELECTRON. MARK.	TICKET FRAUD AND TICKET SCALPING ACTIVITIES OFTEN CAUSE HIGH COSTS AS WELL AS TRUST CONCERNS FOR FANS BUYING EVENT TICKETS, ESPECIALLY IN THE SECONDARY TICKETING MARKET. TO ADDRESS THESE ISSUES, SEVERAL PUBLICATIONS AND PROJECTS HAVE PROPOSED USING BLOCKCHAIN TECHNOLOGY TO ENABLE DIGITAL TRUST AND TICKET VERIFIABILITY AND THUS TO IMPROVE EVENT TICKETING SYSTEMS. HOWEVER, THESE APPROACHES EXHIBIT …	S. FEULNER; BRANCH BUSINESS & INFORMATION SYSTEMS ENGINEERING, FRAUNHOFER INSTITUTE FOR APPLIED INFORMATION TECHNOLOGY FIT, BAYREUTH, WITTELSBACHERRING 10, 95447, GERMANY; EMAIL: SIMON.FEULNER@FIT.FRAUNHOFER.DE	10.1007/s12525-022-00573-9	10196781	ELECTRONIC MARKETS	ENGLISH	11	3	SPRINGER SCIENCE AND BUSINESS MEDIA DEUTSCHLAND GMBH	ISI	EXPLORING THE USE OF SELFSOVEREIGN IDENTITY FOR EVENT TICKETING SYSTEMS	ARTICLE	32	2022	FEULNER SIMON;SEDLMEIR JOHANNES;SCHLATT VINCENT;URBACH NILS	ELECTRON MARK	none	FRAUNHOFER INSTITUTE FOR APPLIED INFORMATION TECHNOLOGY FIT;UNIVERSITY OF BAYREUTH;FRANKFURT UNIVERSITY OF APPLIED SCIENCES	NOTREPORTED;FRAUNHOFER INSTITUTE FOR APPLIED INFORMATION TECHNOLOGY FIT;NOTREPORTED		FEULNER S, 2022, ELECTRON MARK	FEULNER S, 2022, ELECTRON MARK	GERMANY	FEULNER S, 2022,	wos
CHRISTIAN S;HIDAYAT D;MEIRYANI M;FERNANDO E;IKHSAN R	CASHLESS PAYMENT; CONCEPTUAL MODEL; E-WALLET; INTENTION TO USE; TECHNOLOGY	CASH PAYMENTS; CASHLESS PAYMENT; CONCEPTUAL MODEL; E-WALLET; INTENTION TO USE; MODELING ANALYZES; PAYMENT INSTRUMENT; TECHNOLOGICAL DEVELOPMENT; TECHNOLOGY; USER'S INTENTIONS; SMARTPHONES	BINA NUSANTARA UNIVERSITY, SCHOOL OF INFORMATION SYSTEMS, INFORMATION SYSTEM DEPARTMENT, JAKARTA, INDONESIA; BINA NUSANTARA UNIVERSITY, BINUS ENTREPRENEURSHIP CENTER, MANAGEMENT DEPARTMENT, JAKARTA, INDONESIA; BINA NUSANTARA UNIVERSITY, FACULTY OF ECONOMICS AND COMMUNICATION, DEPARTMENT OF ACCOUNTING, JAKARTA, INDONESIA; BINA NUSANTARA UNIVERSITY, BINUS ONLINE LEARNING, MANAGEMENT DEPARTMENT, JAK…	ICBIR - INT. CONF. BUS. IND. RES., PROC.	IN TODAY'S MODERN ERA, TECHNOLOGICAL DEVELOPMENTS ARE VERY ADVANCED AND CONTINUE TO DEVELOP FROM AGE TO AGE. THESE TECHNOLOGICAL DEVELOPMENTS ALSO INCLUDE PAYMENTS THAT SWITCH CASH PAYMENTS TO NON-CASH. AN EXAMPLE OF TECHNOLOGY THAT CAN BE LEARNED IS E-WALLET. E-WALLET, WHICH STANDS FOR ELECTRONIC WALLET, IS A SUBSTITUTE FOR PAYMENT INSTRUMENTS IN THE FORM OF A SMARTPHONE APPLICATION THAT FACILIT…		10.1109/ICBIR54589.2022.9786478		ICBIR 2022 - 2022 7TH INTERNATIONAL CONFERENCE ON BUSINESS AND INDUSTRIAL RESEARCH, PROCEEDINGS	ENGLISH	2		INSTITUTE OF ELECTRICAL AND ELECTRONICS ENGINEERS INC.	ISI	DEVELOPMENT CONCEPTUAL MODEL ANALYSIS OF FACTORS THAT INFLUENCE USER INTENTION TO USE EWALLET	CONFERENCE PAPER		2022	CHRISTIAN SULISTIO ALVIN;HIDAYAT DESMAN;MEIRYANI;FERNANDO ERICK;IKHSAN RIDHO BRAMULYA	ICBIR - INT CONF BUS IND RES, PROC	none	BINA NUSANTARA UNIVERSITY;BINA NUSANTARA UNIVERSITY;BINA NUSANTARA UNIVERSITY;BINA NUSANTARA UNIVERSITY	BINA NUSANTARA UNIVERSITY;BINA NUSANTARA UNIVERSITY;BINA NUSANTARA UNIVERSITY;BINA NUSANTARA UNIVERSITY		CHRISTIAN SA, 2022, ICBIR - INT CONF BUS IND RES, PROC	CHRISTIAN SA, 2022, ICBIR - INT CONF BUS IND RES, PROC	INDONESIA	CHRISTIAN SA, 2022, ICBIR - INT CONF BUS IND RES,	wos
NA N				LECT. NOTES NETWORKS SYST.	THE PROCEEDINGS CONTAIN 75 PAPERS. THE SPECIAL FOCUS IN THIS CONFERENCE IS ON RISING THREATS IN EXPERT APPLICATIONS AND SOLUTIONS. THE TOPICS INCLUDE: A COMPARATIVE STUDY OF DIFFERENT MACHINE LEARNING BASED FEATURE EXTRACTION TECHNIQUES IN BACTERIAL IMAGE CLASSIFICATION; CLOUD REMOVAL AND SATELLITE IMAGE RECONSTRUCTION USING DEEP LEARNING BASED IMAGE INPAINTING APPROACHES; A NOVEL CIPHER TECHNIQU…			23673370	LECTURE NOTES IN NETWORKS AND SYSTEMS	ENGLISH	0		SPRINGER SCIENCE AND BUSINESS MEDIA DEUTSCHLAND GMBH	ISI	2ND FICR INTERNATIONAL CONFERENCE ON RISING THREATS IN EXPERT APPLICATIONS AND SOLUTIONS FICRTEAS 2022	CONFERENCE REVIEW	434	2022		LECT NOTES NETWORKS SYST	none		NOTREPORTED		NA NA, 2022, LECT NOTES NETWORKS SYST	NA NA, 2022, LECT NOTES NETWORKS SYST		NA NA, 2022,	wos
SCHWALM S;ALBRECHT D;ALAMILLO I	DIGITAL WALLET; EID; EIDAS; IDENTITY MODEL; SELF-SOVEREIGN IDENTITY; SSI	ELECTRONIC DOCUMENT IDENTIFICATION SYSTEMS; DECENTRALISATION; DIGITAL IDENTITY; DIGITAL WALLETS; EID; EIDAS; IDENTITY MODELS; LEGAL RULES; SELF-SOVEREIGN IDENTITY; SSI; USER-CENTRIC IDENTITY; STANDARDIZATION	MSG GROUP, ROBERT-BÜRKLE-STR. 1, ISMANING, 85737, GERMANY; UNIVERSIDAD DE MURCIA, C. CAMPUS UNIVERSITARIO 11, MURCIA, 30100, SPAIN	LECT. NOTES INFORMATICS (LNI), PROC. - SERIES GES. INFORM. (GI)	THE PROPOSAL FOR REVIEW OF THE EIDAS REGULATION FROM 2021 HAS OPENED STRONG EXPECTATIONS FOR A DEEP CHANGE IN TRADITIONAL IDENTITY MODELS. THE USER-CENTRIC IDENTITY MODEL PROPOSED STARTS WITH THE CREATION OF EUROPEAN DIGITAL IDENTITY WALLETS THAT WILL ENABLE CITIZENS' CONTROL OVER THEIR DATA IN IDENTIFICATION AND AUTHENTICATION PROCESSES WITHOUT CONTROL BY ENTITIES PROVIDING THE IDENTIFICATION SE…			16175468	LECTURE NOTES IN INFORMATICS (LNI), PROCEEDINGS - SERIES OF THE GESELLSCHAFT FUR INFORMATIK (GI)	ENGLISH	7		GESELLSCHAFT FUR INFORMATIK (GI)	ISI	EIDAS 20 CHALLENGES PERSPECTIVES AND PROPOSALS TO AVOID CONTRADICTIONS BETWEEN EIDAS 20 AND SSI	CONFERENCE PAPER	P-325	2022	SCHWALM STEFFEN;ALBRECHT DARIA;ALAMILLO IGNACIO	LECT NOTES INFORMATICS (LNI), PROC - SERIES GES INFORM (GI)	none	UNIVERSIDAD DE MURCIA	NOTREPORTED;UNIVERSIDAD DE MURCIA		SCHWALM S, 2022, LECT NOTES INFORMATICS (LNI), PROC - SERIES GES INFORM (GI)	SCHWALM S, 2022, LECT NOTES INFORMATICS (LNI), PROC - SERIES GES INFORM (GI)	SPAIN	SCHWALM S, 2022, LECT NOTES INFORMATICS (LNI),	wos
OBIDAT A;ALMAHAMEED M;ALALWAN M	EPAYMENT; FINTECH; MOBILE WALLETS; POST-ADOPTION STAGE; TECHNOLOGY ACCEPTANCE MODEL		DEPARTMENT OF MANAGEMENT INFORMATION SYSTEMS, COLLEGE OF BUSINESS ADMINISTRATION AND ECONOMICS, AL-HUSSEIN BIN TALAL UNIVERSITY, MA’AN, JORDAN	DECIS. SCI. LETT.	ALTHOUGH THE CRITICAL SUCCESS FACTORS MIGHT BE DIFFERENT BETWEEN THE PRE AND POST-ADOPTION STAGES OF MOBILE WALLETS, THERE HAVE BEEN FEW STUDIES CONDUCTED TO EXAMINE THOSE FACTORS FOR THE POST-ADOPTION STAGE WHEN COMPARED TO THE NUMBER OF STUDIES CONDUCTED TO EXAMINE THOSE FACTORS FOR THE PRE-ADOPTION STAGE. YET, THE POST-ADOPTION STAGE OF MOBILE WALLETS IS CRUCIAL TO THE SUCCESS AND SUSTAINABILI…	A. OBIDAT; DEPARTMENT OF MANAGEMENT INFORMATION SYSTEMS, COLLEGE OF BUSINESS ADMINISTRATION AND ECONOMICS, AL-HUSSEIN BIN TALAL UNIVERSITY, MA’AN, JORDAN; EMAIL: AHMAD.H.A.OBIDAT@AHU.EDU.JO	10.5267/j.dsl.2022.2.005	19295804	DECISION SCIENCE LETTERS	ENGLISH	3	3	GROWING SCIENCE	ISI	AN EMPIRICAL EXAMINATION OF FACTORS AFFECTING THE POSTADOPTION STAGE OF MOBILE WALLETS BY CONSUMERS A PERSPECTIVE FROM A DEVELOPING COUNTRY	ARTICLE	11	2022	OBIDAT AHMAD;ALMAHAMEED MOHAMMAD;ALALWAN MOHAMMAD	DECIS SCI LETT	none	AL-HUSSEIN BIN TALAL UNIVERSITY	NOTREPORTED;AL-HUSSEIN BIN TALAL UNIVERSITY;NOTREPORTED		OBIDAT A, 2022, DECIS SCI LETT	OBIDAT A, 2022, DECIS SCI LETT	JORDAN	OBIDAT A, 2022,	wos
YU Y;XU Y;YUAN J;WU C;LIU X;SU M	BLOCKCHAIN; CONVENIENCE; DIGITAL WALLET; SECURITY; VISUAL SECRET SHARING	AUDIO WATERMARKING; CODES (SYMBOLS); WATERMARKING; BLOCK-CHAIN; COMBINATORIAL STRUCTURES; CONVENIENCE; DIGITAL WALLETS; IMAGE-BASED; KEY RECOVERY; KEY-MANAGEMENT; SECURITY; VISUAL SECRET SHARING; VISUAL SECRET SHARING SCHEMES; BLOCKCHAIN	NANKAI UNIVERSITY, COLLEGE OF COMPUTER SCIENCE, CYBER SCIENCE, TIANJIN, CHINA	PROC. - IEEE SMARTWORLD, UBIQUITOUS INTELL, COMPUT., AUTON. TRUST. VEH., SCALABLE COMPUT. COMMUN., DIGIT. TWIN, PRIV. COMPUT., METAVERSE, SMARTWORLD/UIC/ATC/SCALCOM/DIGITALTWIN/PRICOMP/METAVERSE 2023	WITH THE WIDE APPLICATION OF BLOCKCHAIN IN ALL WALKS OF LIFE, THE MANAGEMENT OF BLOCKCHAIN KEYS HAS BECOME INCREASINGLY IMPORTANT. AT PRESENT, THE KEY MANAGEMENT OF BLOCKCHAIN DIGITAL WALLET MOSTLY RELIES ON MNEMONICS WHICH ARE STILL HARD TO MEMORIZE. IN THIS PAPER, WE PROPOSE A NEW DESIGN OF BLOCKCHAIN DIGITAL WALLET. WE GENERATE THE KEY INTO A CODE WHICH LATER IS SEPARATED INTO N SHARED IMAGES …		10.1109/SmartWorld-UIC-ATC-ScalCom-DigitalTwin-PriComp-Metaverse56740.2022.00342		PROCEEDINGS - 2022 IEEE SMARTWORLD, UBIQUITOUS INTELLIGENCE AND COMPUTING, AUTONOMOUS AND TRUSTED VEHICLES, SCALABLE COMPUTING AND COMMUNICATIONS, DIGITAL TWIN, PRIVACY COMPUTING, METAVERSE, SMARTWORLD/UIC/ATC/SCALCOM/DIGITALTWIN/PRICOMP/METAVERSE 2022	ENGLISH	0		INSTITUTE OF ELECTRICAL AND ELECTRONICS ENGINEERS INC.	ISI	KEYCRUX A NEW DESIGN OF DISTRIBUTED AND CONVENIENT BLOCKCHAIN DIGITAL WALLET	CONFERENCE PAPER		2022	YU YIFAN;XU YUNKAI;YUAN JIAWEI;WU CHANGHAO;LIU XIAOGGUANG;SU MING	PROC - IEEE SMARTWORLD, UBIQUITOUS INTELL, COMPUT, AUTON TRUST VEH, SCALABLE COMPUT COMMUN, DIGIT TWIN, PRIV COMPUT, METAVERSE, SMARTWORLD/UIC/ATC/SCALCOM/DIGITALTWIN/PRICOMP/METAVERSE 2023	none	NANKAI UNIVERSITY	NANKAI UNIVERSITY		YU Y, 2022, PROC - IEEE SMARTWORLD, UBIQUITOUS INTELL, COMPUT, AUTON TRUST VEH, SCALABLE COMPUT COMMUN, DIGIT TWIN, PRIV COMPUT, METAVERSE, SMARTWORLD/UIC/ATC/SCALCOM/DIGITALTWIN/PRICOMP/METAVERSE 2023	YU Y, 2022, PROC - IEEE SMARTWORLD, UBIQUITOUS INTELL, COMPUT, AUTON TRUST VEH, SCALABLE COMPUT COMMUN, DIGIT TWIN, PRIV COMPUT, METAVERSE, SMARTWORLD/UIC/ATC/SCALCOM/DIGITALTWIN/PRICOMP/METAVERSE 2023	CHINA	YU Y, 2022, PROC - IEEE SMARTWORLD, UBIQUITOUS INTELL, COMPUT, AUTON TRUST VEH, SCALABLE COMPUT COMMUN, DIGIT TWIN, PRIV COMPUT, METAVERSE,	wos
NOER L;PUTRA S;ADRIANI A	E-COMMERCE; E-WALLET; ONLINE BOOK SHOPPING; STRUCTURAL EQUATION MODELING		SEPULUH NOPEMBER INSTITUTE OF TECHNOLOGY, EAST JAVA, SURABAYA, INDONESIA	PUBL. RES. Q.	THE COVID-19 PANDEMIC HAS LEAD TO THE IMPLEMENTATION OF QUARANTINE FOR THE ENTIRE WORLD COMMUNITY. THIS IS DONE TO PREVENT THE SPREAD OF COVID-19 AND DEATH FROM IT. THIS IMPACT IS ALSO FELT BY STUDENTS WHO HAVE TO DO MANY ACTIVITIES INCLUDING BUYING BOOKS ONLINE. IN INDONESIA, TOKOPEDIA AND SHOPEE ARE THE BEST-SELLING E-COMMERCE PLATFORMS USED BY THE PUBLIC TO BUY BOOKS ONLINE. MOREOVER, EACH OF …	L.R. NOER; SEPULUH NOPEMBER INSTITUTE OF TECHNOLOGY, SURABAYA, EAST JAVA, INDONESIA; EMAIL: LISSA_RN@MMT.ITS.AC.ID	10.1007/s12109-022-09859-4	10538801	PUBLISHING RESEARCH QUARTERLY	ENGLISH	3	1	SPRINGER	ISI	ONLINE BOOK SHOPPING IN INDONESIAN DURING THE COVID19 PANDEMIC	ARTICLE	38	2022	NOER LISSA ROSDIANA;PUTRA SYAIFURRIZAL WIJAYA;ADRIANI ANNISA ADINDA	PUBL RES Q	none	SEPULUH NOPEMBER INSTITUTE OF TECHNOLOGY	NOTREPORTED;SEPULUH NOPEMBER INSTITUTE OF TECHNOLOGY;NOTREPORTED		NOER LR, 2022, PUBL RES Q	NOER LR, 2022, PUBL RES Q	INDONESIA	NOER LR, 2022,	wos
TANG M;DIEO B;SUHAIMI M;ANDAM J	PERCEIVED EASE OF USE; PERCEIVED RISK AND REWARD; PERCEIVED USEFULNESS; TECHNOLOGY ACCEPTANCE MODEL (TAM)		UNIVERSITY OF TECHNOLOGY SARAWAK, MALAYSIA; METHODIST PILLEY INSTITUTE, MALAYSIA	INT. J. BUS. SOC.	THIS PAPER DISCUSSES THE ADOPTION FACTORS OF ELECTRONIC WALLET, MORE SPECIFICALLY SARAWAK PAY IN KUCHING, SARAWAK. THE SARAWAK GOVERNMENT HAS A VERY AGGRESSIVE MANDATE IN TERMS OF DIGITAL TRANSFORMATION TO BOOST THE E-COMMERCE INDUSTRY IN SARAWAK. PROPEL WITH THE EFFORT OF FEDERAL AND STATE GOVERNMENTS IN ENCOURAGING A CASHLESS AND DIGITAL SOCIETY, KUCHING WILL FORESEE A RAPID RISE IN THE ADOPTIO…	M.B. TANG; CENTRE OF UNIVERSITY COURSES AND INNOVATIVE LEARNING, UNIVERSITY OF TECHNOLOGY SARAWAK, SIBU, SARAWAK, 96000, MALAYSIA; EMAIL: MAXIMUS@UTS.EDU.MY	10.33736/ijbs.5172.2022	15116670	INTERNATIONAL JOURNAL OF BUSINESS AND SOCIETY	ENGLISH	1	3	UNIVERSITI MALAYSIA SARAWAK	ISI	THE EMERGENCE OF EWALLET IN SARAWAK FACTORS INFLUENCING THE ADOPTION OF SARAWAK PAY	ARTICLE	23	2022	TANG MAXIMUS BALLA;DIEO BARBARA ANAK;SUHAIMI MOHD KAMARUL ANWAR MOHD;ANDAM JESSICA LYN ANAK	INT J BUS SOC	none	UNIVERSITY OF TECHNOLOGY SARAWAK;METHODIST PILLEY INSTITUTE	NOTREPORTED;CENTRE OF UNIVERSITY COURSES AND INNOVATIVE LEARNING;NOTREPORTED		TANG MB, 2022, INT J BUS SOC	TANG MB, 2022, INT J BUS SOC	MALAYSIA	TANG MB, 2022,	wos
GUPTA R	INDIA; MOBILE WALLET; PERCEIVED PURPOSE OF USE; PERCEIVED REASON TO USE; PERCEIVED RISK; SIMPLIFICATION; SOCIAL INFLUENCE; USEFULNESS		DEPARTMENT OF HUMANITIES AND MANAGEMENT SCIENCE, MADAN MOHAN MALAVIYA UNIVERSITY OF TECHNOLOGY, UTTAR PRADESH, GORAKHPUR, INDIA	INT. J. INTELLECT PROP. MANAGE.	USES OF MOBILE WALLET ACROSS THE WORLD IS TREMENDOUSLY INCREASING, THIS PROVIDES SEVERAL ADVANTAGES AND DISADVANTAGES TO THE USERS. THE NUMBER OF USERS IN INDIA IS ALSO INCREASING AT A SIGNIFICANT LEVEL. BUT UNLIKELY TO THE DEVELOPED NATIONS, DEVELOPING NATIONS LIKE INDIA HAVE NUMEROUS CHALLENGES TO ITS POTENTIAL USERS OF MOBILE WALLET. THE PAPER INVESTIGATES THE DETERMINANTS OF USES OF MOBILE WA…	R.K. GUPTA; DEPARTMENT OF HUMANITIES AND MANAGEMENT SCIENCE, MADAN MOHAN MALAVIYA UNIVERSITY OF TECHNOLOGY, GORAKHPUR, UTTAR PRADESH, INDIA; EMAIL: RAVIKUMARECO@GMAIL.COM	10.1504/IJIPM.2022.124634	14789647	INTERNATIONAL JOURNAL OF INTELLECTUAL PROPERTY MANAGEMENT	ENGLISH	14	3	INDERSCIENCE PUBLISHERS	ISI	ADOPTION OF MOBILE WALLET SERVICES AN EMPIRICAL ANALYSIS	ARTICLE	12	2022	GUPTA RAVI KUMAR	INT J INTELLECT PROP MANAGE	none	MADAN MOHAN MALAVIYA UNIVERSITY OF TECHNOLOGY	NOTREPORTED;MADAN MOHAN MALAVIYA UNIVERSITY OF TECHNOLOGY;NOTREPORTED		GUPTA RK, 2022, INT J INTELLECT PROP MANAGE	GUPTA RK, 2022, INT J INTELLECT PROP MANAGE	INDIA	GUPTA RK, 2022,	wos
MUNILLA G G;BABEL M;SEDLMEIR J	DIGITAL WALLET; EXPONENTIAL NOISE; PRIVACY; RANDOMIZED RESPONSE; SNARK; SURVEY; ZERO-KNOWLEDGE PROOF	DIFFERENTIAL PRIVACIES; DIGITAL WALLETS; EXPONENTIAL NOISE; EXPONENTIALS; PRIVACY; RANDOMIZED RESPONSE; SNARK; STATISTICAL DISCLOSURE; VERIFIABILITY; ZERO-KNOWLEDGE PROOFS; RANDOM NUMBER GENERATION	TECHNICAL UNIVERSITY OF MUNICH, GARCHING, GERMANY; FIM RESEARCH CENTER, UNIVERSITY OF BAYREUTH, BAYREUTH, GERMANY; FRAUNHOFER FIT, BRANCH BUSINESS AND INFORMATION SYSTEMS ENGINEERING, BAYREUTH, GERMANY	ACM INT. CONF. PROC. SER.	ANALYSES THAT FULFILL DIFFERENTIAL PRIVACY PROVIDE PLAUSIBLE DENIABILITY TO INDIVIDUALS WHILE ALLOWING ANALYSTS TO EXTRACT INSIGHTS FROM DATA. HOWEVER, BEYOND AN OFTEN ACCEPTABLE ACCURACY TRADEOFF, THESE STATISTICAL DISCLOSURE TECHNIQUES GENERALLY INHIBIT THE VERIFIABILITY OF THE PROVIDED INFORMATION, AS ONE CANNOT CHECK THE CORRECTNESS OF THE PARTICIPANTS' TRUTHFUL INFORMATION, THE DIFFERENTIALL…	G. MUNILLA GARRIDO; TECHNICAL UNIVERSITY OF MUNICH, GARCHING, GERMANY; EMAIL: GONZALO.MUNILLA-GARRIDO@TUM.DE	10.1145/3538969.3538992		ACM INTERNATIONAL CONFERENCE PROCEEDING SERIES	ENGLISH	0		ASSOCIATION FOR COMPUTING MACHINERY	ISI	TOWARDS VERIFIABLE DIFFERENTIALLYPRIVATE POLLING	CONFERENCE PAPER		2022	MUNILLA GARRIDO GONZALO;BABEL MATTHIAS;SEDLMEIR JOHANNES	ACM INT CONF PROC SER	none	TECHNICAL UNIVERSITY OF MUNICH;UNIVERSITY OF BAYREUTH	NOTREPORTED;TECHNICAL UNIVERSITY OF MUNICH;NOTREPORTED		MUNILLA GARRIDO G, 2022, ACM INT CONF PROC SER	MUNILLA GARRIDO G, 2022, ACM INT CONF PROC SER	GERMANY	MUNILLA GARRIDO G, 2022,	wos
AZMAN N;ZABRI M	FINTECH; MUSLIM MICRO-ENTREPRENEURS; SHARI'AH-COMPLIANT FINTECH; UTAUT		SCHOOL OF MANAGEMENT, UNIVERSITI SAINS MALAYSIA, MALAYSIA; FACULTY OF BUSINESS AND ECONOMICS, UNIVERSITY OF MALAYA, MALAYSIA	J. ISLAM. MONET. ECON. FINANC.	FINTECH HAS BEEN BENEFICIAL TO THE FINANCIAL SERVICES INDUSTRY AND HAS MARKEDLY ENHANCED FINANCIAL INCLUSIVITY. WHILE THE FINTECH HAS ALREADY MADE ITS MARK, THERE HAS BEEN SOMEWHAT LIMITED USE OF SHARI'AH-COMPLIANT FINTECH (SUCH AS P2P LENDING, CROWDFUNDING, WEALTHTECH, E-WALLETS) BY MUSLIM MICROENTREPRENEURS (MES) IN MALAYSIA. HENCE, THIS STUDY EXAMINES THE FACTORS THAT AFFECT SHARI'AH-COMPLIANT…		10.21098/jimf.v8i2.1417	24606146	JOURNAL OF ISLAMIC MONETARY ECONOMICS AND FINANCE	ENGLISH	5	2	BANK INDONESIA INSTITUTE	ISI	SHARIAHCOMPLIANT FINTECH USAGE AMONG MICROENTREPRENEURS IN MALAYSIA AN EXTENSION OF UTAUT MODEL	ARTICLE	8	2022	AZMAN NIK HADIYAN NIK;ZABRI MOHD ZAIDI MD	J ISLAM MONET ECON FINANC	none	UNIVERSITI SAINS MALAYSIA;UNIVERSITY OF MALAYA	UNIVERSITI SAINS MALAYSIA;UNIVERSITY OF MALAYA		AZMAN NHN, 2022, J ISLAM MONET ECON FINANC	AZMAN NHN, 2022, J ISLAM MONET ECON FINANC	MALAYSIA	AZMAN NHN, 2022,	wos
ARACHCHI R;SANDARUWANI J;DINUSHA G	DIGITAL TOURISTS; REVOLUTIONIZED TOURISM; SMART TOURISM; SRI LANKA		DEPARTMENT OF TOURISM MANAGEMENT, FACULTY OF MANAGEMENT STUDIES, SABARAGAMUWA UNIVERSITY OF SRI LANKA, BELIHULOYA, SRI LANKA	TECHNOLOGY APPLICATION IN TOURISM IN ASIA: INNOVATIONS, THEORIES AND PRACTICES	TECHNOLOGY AND TRAVEL JOINT FORCE REINVENT THE TRAVEL CYCLE IN THE TWENTY-FIRST CENTURY. MODERN TRAVELERS DEMAND IMMEDIATE ASSISTANCE, SEAMLESS EXPERIENCE AND PERSONALIZED CONTENT AND SERVICES THAN EVER BEFORE. INTERNET, MOBILE TECHNOLOGY, CLOUD COMPUTING, ARTIFICIAL INTELLIGENCE (AI), ROBOTICS, AUGMENTED REALITY (AR), VIRTUAL REALITY (VR), INTERNET OF THINGS (IOT), AND BIG DATA GIVE TRAVELERS AN…	R.S.S.W. ARACHCHI; DEPARTMENT OF TOURISM MANAGEMENT, FACULTY OF MANAGEMENT STUDIES, SABARAGAMUWA UNIVERSITY OF SRI LANKA, BELIHULOYA, SRI LANKA; EMAIL: RANGANA@MGT.SAB.AC.LK	10.1007/978-981-16-5461-9_22		TECHNOLOGY APPLICATION IN TOURISM IN ASIA: INNOVATIONS, THEORIES AND PRACTICES	ENGLISH	0		SPRINGER INTERNATIONAL PUBLISHING	ISI	CONNECTING THE CONNECTED HOW IS SRI LANKA PREPARED TO RESPOND TO DIGITAL TOURISTS	BOOK CHAPTER		2022	ARACHCHI RSSW;SANDARUWANI JARC;DINUSHA GVH	TECHNOLOGY APPLICATION IN TOURISM IN ASIA: INNOVATIONS, THEORIES AND PRACTICES	none	SABARAGAMUWA UNIVERSITY OF SRI LANKA	NOTREPORTED;SABARAGAMUWA UNIVERSITY OF SRI LANKA;NOTREPORTED		ARACHCHI RSSW, 2022, TECHNOLOGY APPLICATION IN TOURISM IN ASIA: INNOVATIONS, THEORIES AND PRACTICES	ARACHCHI RSSW, 2022, TECHNOLOGY APPLICATION IN TOURISM IN ASIA: INNOVATIONS, THEORIES AND PRACTICES	SRI LANKA	ARACHCHI RSSW, 2022, TECHNOLOGY APPLICATION IN TOURISM IN ASIA: INNOVATIONS,	wos
ORR D	BITCOIN; BLOCKCHAIN; CRYPTOCURRENCY; DIGITAL FORENSICS; DIGITAL WALLET; METHODOLOGY; MONERO; PRIVATE KEY; PROOF OF STAKE (POS); PROOF OF WORK (POS); PUBLIC KEY		DEPARTMENT OF CRIMINAL JUSTICE, UNIVERSITY OF NORTH GEORGIA, GA, UNITED STATES	ENCYCLOPEDIA OF FORENSIC SCIENCES: VOLUME 1-4, THIRD EDITION	THE POPULARITY OF BITCOIN AND OTHER CRYPTOCURRENCIES HAS INCREASED OVER THE PAST FEW YEARS. ALTHOUGH SOME FIND THE IDEA OF DIGITAL CURRENCY TO BE COMPLEX AND UNTRUSTWORTHY, MANY OTHERS SEE OPPORTUNITIES FOR SIGNIFICANT ECONOMIC DEVELOPMENT AND ANONYMITY. ANONYMITY IS ONE OPPORTUNITY THAT DRAWS THOSE WHO SEEK TO CONCEAL THEIR CRIMINAL BEHAVIOR THROUGH ILLICIT ACTIVITIES SUCH AS CYBERCRIME AND RANS…		10.1016/B978-0-12-823677-2.00073-8		ENCYCLOPEDIA OF FORENSIC SCIENCES: VOLUME 1-4, THIRD EDITION	ENGLISH	2		ELSEVIER	ISI	CRYPTOCURRENCY ITS IMPACT AND FORENSIC WORTH	BOOK CHAPTER	1	2022	ORR DOUGLAS A	ENCYCLOPEDIA OF FORENSIC SCIENCES: VOLUME 1-4, THIRD EDITION	none	UNIVERSITY OF NORTH GEORGIA	UNIVERSITY OF NORTH GEORGIA		ORR DA, 2022, ENCYCLOPEDIA OF FORENSIC SCIENCES: VOLUME 1-4, THIRD EDITION	ORR DA, 2022, ENCYCLOPEDIA OF FORENSIC SCIENCES: VOLUME 1-4, THIRD EDITION	USA	ORR DA, 2022, ENCYCLOPEDIA OF FORENSIC SCIENCES: VOLUME 1-4,	wos
JOHAN A;LUKVIARMAN N;PUTRA R	MERCHANT NETWORKS; SERVICE COMPATIBILITY; TECHNOLOGY CONTINUANCE THEORY; VALUE OF A REWARD PROGRAM		MANAGEMENT DEPARTMENT, ANDALAS UNIVERSITY, INDONESIA; ACCOUNTING DEPARTMENT, ANDALAS UNIVERSITY, INDONESIA; BUSINESS ADMINISTRATION DEPARTMENT, PADANG STATE POLYTECHNIC, INDONESIA	INNOV. MARK.	INCREASED USE OF E-WALLETS IN INDONESIA HAS RESULTED IN HIGH COMPETITION AMONG PROVIDERS. HENCE, COMPANIES MUST ACT TO RETAIN CUSTOMERS AND IMPOSE CONTINUOUS UTILIZATION OF THEIR SERVICES. THIS STUDY AIMED TO INVESTIGATE THE DETERMINANTS OF CONTINUOUS INTENTION TO USE THE PREFERRED E-WALLET IN INDONESIA. THE FRAMEWORK WAS DRAWN FROM THE TECHNOLOGY CONTINUANCE THEORY (TCT) WITH MODIFICATIONS TO FI…		10.21511/im.18(4).2022.07	18142427	INNOVATIVE MARKETING	ENGLISH	3	4	LLC CPC BUSINESS PERSPECTIVES	ISI	CONTINUOUS INTENTION TO USE EWALLETS IN INDONESIA THE IMPACT OF EWALLETS FEATURES	ARTICLE	18	2022	JOHAN ARIEF PRIMA;LUKVIARMAN NIKI;PUTRA RAHMAT EKA	INNOV MARK	none	ANDALAS UNIVERSITY;ANDALAS UNIVERSITY;PADANG STATE POLYTECHNIC	ANDALAS UNIVERSITY;ANDALAS UNIVERSITY;PADANG STATE POLYTECHNIC		JOHAN AP, 2022, INNOV MARK	JOHAN AP, 2022, INNOV MARK	INDONESIA	JOHAN AP, 2022,	wos
GUERRIERO S				LIBRA: FACEBOOK'S PROPOS. CRYPTOCURRENCY	THIS BOOK LOOKS AT FACEBOOK'S PROPOSED DIGITAL CURRENCY, LIBRA, AND DIGITAL WALLET, CALIBRA, AND THEIR IMPACTS ON CONSUMERS, INVESTORS, AND THE FINANCIAL SYSTEM. THIS VENTURE IS SLATED TO BE BASED IN SWITZERLAND, WHICH HAS A HISTORY OF BEING A MONETARY HAVEN FOR CRIMINALS AND SHADY CORPORATIONS. FACEBOOK'S PLANS RAISE SERIOUS PRIVACY, TRADING, NATIONAL SECURITY AND MONETARY POLICY CONCERNS. © 202…				LIBRA: FACEBOOK'S PROPOSED CRYPTOCURRENCY	ENGLISH	0		NOVA SCIENCE PUBLISHERS, INC.	ISI	LIBRA FACEBOOKS PROPOSED CRYPTOCURRENCY	BOOK		2022	GUERRIERO SHAWN K	LIBRA: FACEBOOK'S PROPOS CRYPTOCURRENCY	none		NOTREPORTED		GUERRIERO SK, 2022, LIBRA: FACEBOOK'S PROPOS CRYPTOCURRENCY	GUERRIERO SK, 2022, LIBRA: FACEBOOK'S PROPOS CRYPTOCURRENCY		GUERRIERO SK, 2022,	wos
KAVITHA R;RAJESWARI R;MUKHERJEE P;ROUT S;PATRA S	BLOCKCHAIN TECHNOLOGY; MOBILE WALLET; PERFORMANCE MEASURES; QUEUEING MODEL	BLOCKCHAIN; COMPETITION; DEVELOPING COUNTRIES; ELECTRONIC MONEY; NETWORK SECURITY; BLOCK-CHAIN; BLOCKCHAIN TECHNOLOGY; COMPETITIVE ADVANTAGE; MOBILE WALLET; PERFORMANCE; PERFORMANCE MEASURE; QUEUEING MODEL; SECURITY CHALLENGES; QUEUEING THEORY	DEPARTMENT OF COMMERCE, PERIYAR UNIVERSITY, SALEM, INDIA; SCHOOL OF COMPUTER ENGINEERING, KIIT DEEMED TO BE UNIVERSITY, BHUBANESWAR, INDIA; DEPARTMENT OF CSE, SILICON INSTITUTE OF TECHNOLOGY, BHUBANESWAR, INDIA; SCHOOL OF COMPUTER APPLICATIONS, KIIT DEEMED TO BE UNIVERSITY, BHUBANESWAR, INDIA	SMART INNOV. SYST. TECHNOL.	SMART AND CASHLESS PAYMENTS THROUGH MOBILE WALLETS ARE THE RECENT IMPLEMENTATION OF DIGITAL PAYMENT ALTERNATIVES IN DEVELOPING COUNTRIES TO ACHIEVE COMPETITIVE ADVANTAGE. BLOCKCHAIN IS AN EGRESSING DIGITALLY MANAGED TECHNOLOGY (BT) WHICH ALLOWS UBIQUITOUS MONETARY TRANSACTIONS WITH THE UNTRUSTED ENTITIES. IN BLOCKCHAIN, IT IS IMPOSSIBLE TO CHANGE RECORDS WITHOUT NOTIFYING ALL PARTICIPANTS AND VAL…	S.S. PATRA; SCHOOL OF COMPUTER APPLICATIONS, KIIT DEEMED TO BE UNIVERSITY, BHUBANESWAR, INDIA; EMAIL: SUDHANSHUPATRA@GMAIL.COM	10.1007/978-981-19-0011-2_25	21903018	SMART INNOVATION, SYSTEMS AND TECHNOLOGIES	ENGLISH	2		SPRINGER SCIENCE AND BUSINESS MEDIA DEUTSCHLAND GMBH	ISI	PERFORMANCE MEASURES OF BLOCKCHAINBASED MOBILE WALLET USING QUEUEING MODEL	CONFERENCE PAPER	289	2022	KAVITHA R;RAJESWARI R;MUKHERJEE PRATYUSA;ROUT SUCHISMITA;PATRA SS	SMART INNOV SYST TECHNOL	none	PERIYAR UNIVERSITY;KIIT DEEMED TO BE UNIVERSITY;SILICON INSTITUTE OF TECHNOLOGY;KIIT DEEMED TO BE UNIVERSITY	NOTREPORTED;KIIT DEEMED TO BE UNIVERSITY;NOTREPORTED		KAVITHA R, 2022, SMART INNOV SYST TECHNOL	KAVITHA R, 2022, SMART INNOV SYST TECHNOL	INDIA	KAVITHA R, 2022,	wos
KAPOOR A;SINDWANI R;GOEL M;SHANKAR A	COVID-19; MOBILE WALLET ADOPTION; PERCEIVED CRITICAL MASS; PERCEIVED VALUES; PROMOTIONAL BENEFITS	MODERATORS; ADOPTION INTENTION; CONCEPTUAL FRAMEWORKS; CONDITION; CRITICAL MASS; MOBILE WALLET ADOPTION; PERCEIVED CRITICAL MASS; PERCEIVED VALUE; PROMOTIONAL BENEFIT; SAMPLING METHOD; SECURITY CONSIDERATIONS; COVID-19	J. C. BOSE UNIVERSITY OF SCIENCE AND TECHNOLOGY, YMCA, FARIDABAD, INDIA; INDIAN INSTITUTE OF MANAGEMENT, ANDHRA PRADESH, VISAKHAPATNAM, INDIA	COMPUT IND ENG	THIS RESEARCH AIMS TO EXPLORE ADOPTION INTENTION TOWARDS MOBILE WALLET (M-WALLET) AMID COVID-19 OUTBREAK USING MEDIATED-MODERATION FRAMEWORK. THIS STUDY, IN ITS UNIQUENESS, UTILISES THE STIMULUS-ORGANISM-RESPONSE (S[SBND]O[SBND]R) THEORY AS ITS THEORETICAL BASE. THE STUDY INVESTIGATED THE EFFECT OF RELATIVE ADVANTAGE, EASE OF EFFORT, FAVOURABLE INFRASTRUCTURE CONDITIONS, SECURITY CONSIDERATIONS, …	A. KAPOOR; J. C. BOSE UNIVERSITY OF SCIENCE AND TECHNOLOGY, YMCA, FARIDABAD, INDIA; EMAIL: ASHWARYAKAPOOR@JCBOSEUST.AC.IN	10.1016/j.cie.2022.108646	03608352	COMPUTERS AND INDUSTRIAL ENGINEERING	ENGLISH	30		ELSEVIER LTD	ISI	MOBILE WALLET ADOPTION INTENTION AMID COVID19 PANDEMIC OUTBREAK A NOVEL CONCEPTUAL FRAMEWORK	ARTICLE	172	2022	KAPOOR ASHWARYA;SINDWANI RAJIV;GOEL MANISHA;SHANKAR AMIT	COMPUT IND ENG	none	J. C. BOSE UNIVERSITY OF SCIENCE AND TECHNOLOGY;INDIAN INSTITUTE OF MANAGEMENT	NOTREPORTED;J. C. BOSE UNIVERSITY OF SCIENCE AND TECHNOLOGY;NOTREPORTED		KAPOOR A, 2022, COMPUT IND ENG	KAPOOR A, 2022, COMPUT IND ENG	INDIA	KAPOOR A, 2022,	wos
ANAZA N;BENNETT D;ANDONOVA Y;ANAZA E	CASHLESS; DIGITAL PAYMENT SYSTEMS; DPS 2.0		SOUTHERN ILLINOIS UNIVERSITY CARBONDALE, REHN HALL RM 229, 1025 LINCOLN DRIVE, CARBONDALE, 62901, IL, UNITED STATES; HOWARD UNIVERSITY, 2400 SIXTH ST NW, WASHINGTON, 20059, DC, UNITED STATES; ARTHUR J. BAUERNFEIND COLLEGE OF BUSINESS, MURRAY STATE UNIVERSITY, 413B BUSINESS BUILDING, MURRAY, 42071, KY, UNITED STATES; HART SCHOOL OF HOSPITALITY, SPORT AND RECREATION MANAGEMENT, JAMES MADISON UNIVER…	MARK. LETT.	WHILE CASH WILL EVENTUALLY BECOME A THING OF THE PAST, MARKETING RESEARCHERS HAVE GIVEN LITTLE ATTENTION TO THE RISE OF CASHLESS MARKETS AND THE OBSTACLES AND OPPORTUNITIES THEY PRESENT. IN FACT, RESEARCH THAT ADDRESSES THE STRATEGIC APPROACH TO PLANNING, COORDINATING, AND EXECUTING THE CASHLESS ADOPTION AND EXPERIENCE FOR CONSUMERS IS SCANT. TO STIMULATE DISCUSSION AND SCHOLARLY INVESTIGATIONS I…	Y. ANDONOVA; ARTHUR J. BAUERNFEIND COLLEGE OF BUSINESS, MURRAY STATE UNIVERSITY, MURRAY, 413B BUSINESS BUILDING, 42071, UNITED STATES; EMAIL: YANDONOVA@MURRAYSTATE.EDU	10.1007/s11002-022-09641-8	09230645	MARKETING LETTERS	ENGLISH	4	4	SPRINGER	ISI	DPS 20 ON THE ROAD TO A CASHLESS SOCIETY	ARTICLE	33	2022	ANAZA NWAMAKA A;BENNETT DELANCY H S;ANDONOVA YANA;ANAZA EMEKA	MARK LETT	none	SOUTHERN ILLINOIS UNIVERSITY CARBONDALE;HOWARD UNIVERSITY;MURRAY STATE UNIVERSITY;JAMES MADISON UNIVERSITY	NOTREPORTED;MURRAY STATE UNIVERSITY;NOTREPORTED		ANAZA NA, 2022, MARK LETT	ANAZA NA, 2022, MARK LETT	USA	ANAZA NA, 2022,	wos
SEDLMEIR J;LAUTENSCHLAGER J;FRIDGEN G;URBACH N	CONFIDENTIALITY; DATA PROTECTION; DIGITAL WALLET; DISTRIBUTED LEDGER TECHNOLOGY; PRIVACY; VERIFIABLE COMPUTATION		PROJECT GROUP BUSINESS & INFORMATION SYSTEMS ENGINEERING OF THE FRAUNHOFER FIT, WITTELSBACHERRING 10, BAYREUTH, 95447, GERMANY; FIM RESEARCH CENTER, UNIVERSITY OF BAYREUTH, WITTELSBACHERRING 10, BAYREUTH, 95447, GERMANY; INTERDISCIPLINARY CENTER FOR SECURITY, RELIABILITY AND TRUST, UNIVERSITY OF LUXEMBOURG, LUXEMBOURG CITY, LUXEMBOURG; FRANKFURT UNIVERSITY OF APPLIED SCIENCES, FRANKFURT, GERMANY	ELECTRON. MARK.	THIS POSITION PAPER DISCUSSES THE CHALLENGES OF BLOCKCHAIN APPLICATIONS IN BUSINESSES AND THE PUBLIC SECTOR RELATED TO AN EXCESSIVE DEGREE OF TRANSPARENCY. WE FIRST POINT OUT THE TYPES OF SENSITIVE DATA INVOLVED IN DIFFERENT PATTERNS OF BLOCKCHAIN USE CASES. WE THEN ARGUE THAT THE IMPLICATIONS OF BLOCKCHAINS’ INFORMATION EXPOSURE CAUSED BY REPLICATED TRANSACTION STORAGE AND EXECUTION GO WELL BEYO…	J. SEDLMEIR; PROJECT GROUP BUSINESS & INFORMATION SYSTEMS ENGINEERING OF THE FRAUNHOFER FIT, BAYREUTH, WITTELSBACHERRING 10, 95447, GERMANY; EMAIL: JOHANNES.SEDLMEIR@FIT.FRAUNHOFER.DE	10.1007/s12525-022-00536-0	10196781	ELECTRONIC MARKETS	ENGLISH	36	3	SPRINGER SCIENCE AND BUSINESS MEDIA DEUTSCHLAND GMBH	ISI	THE TRANSPARENCY CHALLENGE OF BLOCKCHAIN IN ORGANIZATIONS	ARTICLE	32	2022	SEDLMEIR JOHANNES;LAUTENSCHLAGER JONATHAN;FRIDGEN GILBERT;URBACH NILS	ELECTRON MARK	none	UNIVERSITY OF BAYREUTH;UNIVERSITY OF LUXEMBOURG;FRANKFURT UNIVERSITY OF APPLIED SCIENCES	NOTREPORTED;NOTREPORTED;NOTREPORTED		SEDLMEIR J, 2022, ELECTRON MARK	SEDLMEIR J, 2022, ELECTRON MARK	GERMANY	SEDLMEIR J, 2022,	wos
LEE Y;GAN C;LIEW T			FACULTY OF BUSINESS, MULTIMEDIA UNIVERSITY, JALAN AYER KEROH LAMA, MELAKA, 75450, MALAYSIA	HUM. BEHAV. EMERG. TECHNOL.	THE ADOPTION OF CASHLESS PAYMENT METHODS COMPELS IMPULSE BUYING. THIS RESEARCH STUDIES IMPULSE PURCHASE BEHAVIOR BY FOCUSING ON E-WALLET APP CHARACTERISTICS, A FIELD WHERE EMPIRICAL RESEARCH IS STILL SCARCE. THIS PAPER IS AIMED AT DEVELOPING AND TESTING A THEORETICAL MODEL TO EXAMINE A MODERATED MEDIATION MODEL OF MOBILE WALLET APP CHARACTERISTICS AND IMPULSE BUYING THROUGH PERCEIVED ENJOYMENT MO…	C.L. GAN; FACULTY OF BUSINESS, MULTIMEDIA UNIVERSITY, MELAKA, JALAN AYER KEROH LAMA, 75450, MALAYSIA; EMAIL: GAN.CHIN.LAY@MMU.EDU.MY	10.1155/2022/2767735	25781863	HUMAN BEHAVIOR AND EMERGING TECHNOLOGIES	ENGLISH	8		WILEY-HINDAWI	ISI	THE IMPACTS OF MOBILE WALLET APP CHARACTERISTICS ON ONLINE IMPULSE BUYING A MODERATED MEDIATION MODEL	ARTICLE	2022	2022	LEE YI YONG;GAN CHIN LAY;LIEW TZE WEI	HUM BEHAV EMERG TECHNOL	none	MULTIMEDIA UNIVERSITY	NOTREPORTED;MULTIMEDIA UNIVERSITY;NOTREPORTED		LEE YY, 2022, HUM BEHAV EMERG TECHNOL	LEE YY, 2022, HUM BEHAV EMERG TECHNOL	MALAYSIA	LEE YY, 2022,	wos
MEIRYANI M;SOEPRIYANTO G;ELVANI A;WAHYUNINGTIAS D;SAMUKRI S	CONTINUANCE USAGE INTENTION; EASE OF USE; ECONOMIC BENEFITS; FINANCIAL ABILITY; FINANCIAL TECHNOLOGY; INDONESIA; SECURITY		ACCOUNTING DEPARTMENT, SCHOOL OF ACCOUNTING, BINA NUSANTARA UNIVERSITY, JAKARTA, INDONESIA; HOTEL MANAGEMENT DEPARTMENT, FACULTY OF ECONOMICS AND COMMUNICATION, BINA NUSANTARA UNIVERSITY, JAKARTA, INDONESIA; COLLEGE OF ECONOMICS MUHAMMADIYAH JAKARTA (SEKOLAH TINGGI ILMU EKONOMI (STIE) MUHAMMADIYAH JAKARTA), JAKARTA, INDONESIA	CORP. GOV. ORGAN. BEHAV. REV.	THIS STUDY AIMS TO EMPIRICALLY EXAMINE THE INFLUENCE OF EASE OF USE, SECURITY, ECONOMIC BENEFITS, AND FINANCIAL ABILITY ON THE CONTINUANCE USAGE INTENTION OF FINANCIAL TECHNOLOGY PAYMENT IN INDONESIA. BANK INDONESIA (2017) STATES THAT FINANCIAL TECHNOLOGY CAN BE CATEGORIZED INTO FIVE CATEGORIES, NAMELY: 1) PAYMENT SYSTEM, 2) MARKET SUPPORT, 3) INVESTMENT MANAGEMENT AND RISK MANAGEMENT, 4) LOANS, …		10.22495/cgobrv6i3p2	25211870	CORPORATE GOVERNANCE AND ORGANIZATIONAL BEHAVIOR REVIEW	ENGLISH	1	3	VIRTUS INTERPRESS	ISI	THE FACTORS AFFECTING CONSUMER BEHAVIOR ON SUSTAINABLE USE INTENTIONS OF FINANCIAL TECHNOLOGY PAYMENTS	ARTICLE	6	2022	MEIRYANI;SOEPRIYANTO GATOT;ELVANI ANGIE;WAHYUNINGTIAS DIANKA;SAMUKRI	CORP GOV ORGAN BEHAV REV	none	BINA NUSANTARA UNIVERSITY;BINA NUSANTARA UNIVERSITY;COLLEGE OF ECONOMICS MUHAMMADIYAH JAKARTA (SEKOLAH TINGGI ILMU EKONOMI (STIE) MUHAMMADIYAH JAKARTA)	BINA NUSANTARA UNIVERSITY;BINA NUSANTARA UNIVERSITY;COLLEGE OF ECONOMICS MUHAMMADIYAH JAKARTA (SEKOLAH TINGGI ILMU EKONOMI (STIE) MUHAMMADIYAH JAKARTA)		MEIRYANI M, 2022, CORP GOV ORGAN BEHAV REV	MEIRYANI M, 2022, CORP GOV ORGAN BEHAV REV	INDONESIA	MEIRYANI M, 2022,	wos
KRITHIKA M;ZAREENA J	ADOPTION; CHENNAI MILLENNIALS; INNOVATION; MOBILE WALLET; STEPWISE REGRESSION; TECHNOLOGY; TECHNOLOGY ACCEPTANCE MODEL		DEPARTMENT OF MANAGEMENT STUDIES, SAVEETHA SCHOOL OF ENGINEERING, SIMATS, CHENNAI, INDIA; DEPARTMENT OF MANAGEMENT STUDIES, SCAD COLLEGE OF ENGINEERING AND TECHNOLOGY, TIRUNELVELI, INDIA	LECT. NOTES NETWORKS SYST.	NOWADAYS, MILLENNIALS ARE GOOD OPINION LEADERS ON TECHNOLOGY BECAUSE THEY ARE COMFORTABLE WITH NEW TECHNOLOGY AND SOCIAL MEDIA. AS MILLENNIALS GAIN POPULARITY IN CHENNAI, IT IS IMPORTANT TO EXPLORE HOW THE CHENNAI MILLENNIALS’ ADOPTION BEHAVIOUR OF MOBILE WALLETS DIFFERS FROM THE CONCEPTUAL MODEL DEVELOPED FOR THE STUDY IS BASED ON THE TAM THAT WAS TESTED IN THE STUDY. THE IMPORTANT VARIABLES TAK…	M. KRITHIKA; DEPARTMENT OF MANAGEMENT STUDIES, SAVEETHA SCHOOL OF ENGINEERING, SIMATS, CHENNAI, INDIA; EMAIL: KRITHIKAM.SSE@SAVEETHA.COM	10.1007/978-981-19-2894-9_9	23673370	LECTURE NOTES IN NETWORKS AND SYSTEMS	ENGLISH	0		SPRINGER SCIENCE AND BUSINESS MEDIA DEUTSCHLAND GMBH	ISI	AN EMPIRICAL STUDY ON MILLENNIALS ADOPTION OF MOBILE WALLETS	CONFERENCE PAPER	458	2022	KRITHIKA M;ZAREENA JAINAB	LECT NOTES NETWORKS SYST	none	SAVEETHA SCHOOL OF ENGINEERING;SCAD COLLEGE OF ENGINEERING AND TECHNOLOGY	NOTREPORTED;SAVEETHA SCHOOL OF ENGINEERING;NOTREPORTED		KRITHIKA M, 2022, LECT NOTES NETWORKS SYST	KRITHIKA M, 2022, LECT NOTES NETWORKS SYST	INDIA	KRITHIKA M, 2022,	wos
HASSAN M;SHUKUR Z;MOHD M	ANDROID; E-WALLET; ELECTRONIC PAYMENTS; M-BANKING; SECURITY ANALYSIS; STATIC ANALYSIS	ANDROID (OPERATING SYSTEM); CRYPTOGRAPHY; CYBERSECURITY; MOBILE SECURITY; NETWORK SECURITY; STATIC ANALYSIS; ANDROID; CYBER-CRIMES; E-WALLET; ELECTRONIC PAYMENT; FINANCIAL TRANSACTIONS; GLOBAL USE; M-BANKING; MALAYSIA; PENETRATION TESTING; SECURITY ANALYSIS; SECURITY SYSTEMS	CENTER FOR CYBER SECURITY, FACULTY OF INFORMATION TECHNOLOGY NATIONAL UNIVERSITY MALAYSIA (UKM), SELANGOR, BANGI, 43600, MALAYSIA	INTL. J. ADV. COMPUT. SCI. APPL.	E-WALLETS AND M-BANKING APPS BECAME MORE AND MORE POPULAR IN THE DEVELOPED WORLD, APPROACHING A POINT OF TIPPING. THIS CAN BE DUE TO THE GLOBAL USE OF BIG AND SMALL MERCHANTS OF PAYING EQUIPMENT AND THE UBIQUITY OF E-WALLET AND M-BANKING APPS ADOPTION. MANY CONSUMERS ARE USING E-WALLETS AND M-BANKING APPS THAT CAN BE AN EFFECTIVE CYBERCRIME OPTION. E-WALLETS AND M-BANKING APPS ALLOW FINANCIAL TRA…		10.14569/IJACSA.2022.0130580	2158107X	INTERNATIONAL JOURNAL OF ADVANCED COMPUTER SCIENCE AND APPLICATIONS	ENGLISH	2	5	SCIENCE AND INFORMATION ORGANIZATION	ISI	PENETRATION TESTING ON MALAYSIA POPULAR EWALLETS AND MBANKING APPS	ARTICLE	13	2022	HASSAN MD ARIF;SHUKUR ZARINA;MOHD MASNIZAH	INTL J ADV COMPUT SCI APPL	none	FACULTY OF INFORMATION TECHNOLOGY NATIONAL UNIVERSITY MALAYSIA (UKM)	FACULTY OF INFORMATION TECHNOLOGY NATIONAL UNIVERSITY MALAYSIA (UKM)		HASSAN MA, 2022, INTL J ADV COMPUT SCI APPL	HASSAN MA, 2022, INTL J ADV COMPUT SCI APPL	MALAYSIA	HASSAN MA, 2022,	wos
MOHD A S;AB H S;NORHISAM N	DIGITAL PAYMENT; MAT; PERCEIVED SECURITY; POST COVID-19; TRUST; UTAUT		FAKULTI EKONOMI DAN PENGURUSAN, UNIVERSITI KEBANGSAAN MALAYSIA, UKM BANGI, SELANGOR, 43600, MALAYSIA	JURNAL PENGURUSAN	THE COVID-19 PANDEMIC HAS INDIRECTLY ACCELERATED THE LIFESTYLE TRANSITION TO A CASHLESS SOCIETY AND THE APPLICATION OF DIGITAL PAYMENT TRANSACTIONS. HOWEVER, COMPARED TO EXISTING DIGITAL PAYMENT CHANNELS, THE ACCEPTANCE OF E-WALLETS AMONG CONSUMERS IN MALAYSIA IS STILL MINIMAL. THEREFORE, THIS STUDY AIMS TO IDENTIFY FACTORS AFFECTING THE CONSUMERS’ INTENTION TO USE E-WALLETS DURING THE POST-COVID…		10.17576/pengurusan-2022-66-09	01272713	JURNAL PENGURUSAN	MALAY	0		PENERBIT UNIVERSITI KEBANGSAAN MALAYSIA	ISI	DETERMINANTS OF INTENTION TO USE EWALLET POSTCOVID19 PANDEMIC IN MALAYSIA INTEGRATION OF UTAUT AND MAT MODELS FAKTOR PENENTU NIAT PENGGUNAAN EDOMPET PASCA PANDEMIK COVID19 DI MALAYSIA INTEGRASI MODEL UTAUT DAN MAT	ARTICLE	66	2022	MOHD AMIN SYAJARUL IMNA;AB HAMID SITI NGAYESAH;NORHISAM NUR HANNAH	JURNAL PENGURUSAN	none	UNIVERSITI KEBANGSAAN MALAYSIA	UNIVERSITI KEBANGSAAN MALAYSIA		MOHD AMIN SI, 2022, JURNAL PENGURUSAN	MOHD AMIN SI, 2022, JURNAL PENGURUSAN	MALAYSIA	MOHD AMIN SI, 2022,	wos
MALLAWAARACHCHI C			GENERAL SIR JOHN KOTELAWALA DEFENCE UNIVERSITY, SRI LANKA	GEND. PERSPECT. ON IND. 4.0 AND THE IMPACT OF TECHNOL. ON MAINSTREAMING FEMALE EMPLOY.	IN THE RECENT PAST, THE IDEA OF MOBILE WALLETS WAS VERY NEW TO THE WORLD, BUT IT IS NOW BECOMING POPULAR DUE TO THE EXPANSION AND DEVELOPMENT OF SMARTPHONES WITH ROBUST AND SOPHISTICATED FACILITIES. HOWEVER, THE LITERATURE ON MOBILE WALLETS DOES NOT DEEPLY IDENTIFY AND DISCUSS HOW GENDER IS SIGNIFICANT IN THE BUSINESS WORLD WITH THE POWER OF MOBILE WALLETS AND HOW IT IS HELPING TO ADOPT THE BEST …		10.4018/978-1-7998-8594-8.ch010		GENDER PERSPECTIVES ON INDUSTRY 4.0 AND THE IMPACT OF TECHNOLOGY ON MAINSTREAMING FEMALE EMPLOYMENT	ENGLISH	0		IGI GLOBAL	ISI	CASHLESS SOCIETY AND DEVELOPMENT OF GENDERFRIENDLY SERVICES THROUGH MOBILE WALLET	BOOK CHAPTER		2022	MALLAWAARACHCHI CHAMMIKA	GEND PERSPECT ON IND 40 AND THE IMPACT OF TECHNOL ON MAINSTREAMING FEMALE EMPLOY	none	GENERAL SIR JOHN KOTELAWALA DEFENCE UNIVERSITY	GENERAL SIR JOHN KOTELAWALA DEFENCE UNIVERSITY		MALLAWAARACHCHI C, 2022, GEND PERSPECT ON IND 40 AND THE IMPACT OF TECHNOL ON MAINSTREAMING FEMALE EMPLOY	MALLAWAARACHCHI C, 2022, GEND PERSPECT ON IND 40 AND THE IMPACT OF TECHNOL ON MAINSTREAMING FEMALE EMPLOY	SRI LANKA	MALLAWAARACHCHI C, 2022,	wos
GONG Y;WANG Y;FREI R;WANG B;ZHAO C	BLOCKCHAIN TECHNOLOGY; CIRCULAR ECONOMY; DEBRIS MANAGEMENT; MARINE PLASTIC; RECYCLING VALUE CHAINS; SUSTAINABLE SUPPLY CHAINS		SOUTHAMPTON BUSINESS SCHOOL, UNIVERSITY OF SOUTHAMPTON, SO17 1BJ, UK, UNITED KINGDOM; AUCKLAND UNIVERSITY OF TECHNOLOGY (AUT) BUSINESS SCHOOL, AUT UNIVERSITY, PRIVATE BAG 92006, AUCKLAND, 1142, NEW ZEALAND; BUSINESS SCHOOL, CHANGSHU INSTITUTE OF TECHNOLOGY, CHANGSHU, 215500, CHINA	IND. MARK. MANAGE.	THE THREAT TO THE ENVIRONMENT AND HUMANITY CAUSED BY MARINE PLASTIC DEBRIS HAS AROUSED GLOBAL ATTENTION. THIS RESEARCH AIMS TO EXPLORE THE FEASIBILITY OF APPLYING BLOCKCHAIN TECHNOLOGY (BCT) IN MARINE PLASTIC DEBRIS MANAGEMENT. A CASE STUDY ON THREE PIONEER RECYCLING ORGANIZATIONS IS CONDUCTED BASED ON SECONDARY DATA. THE STUDY FOUND THAT BCT CAN BE APPLIED TO SOLVE SOME OF THE EXISTING CHALLENGE…	C. ZHAO; BUSINESS SCHOOL, CHANGSHU INSTITUTE OF TECHNOLOGY, CHANGSHU, 215500, CHINA; EMAIL: ZHAO0037@SINA.COM	10.1016/j.indmarman.2022.01.010	00198501	INDUSTRIAL MARKETING MANAGEMENT	ENGLISH	31		ELSEVIER INC.	ISI	BLOCKCHAIN APPLICATION IN CIRCULAR MARINE PLASTIC DEBRIS MANAGEMENT	ARTICLE	102	2022	GONG YU;WANG YANG;FREI REGINA;WANG BILL;ZHAO CHANGPING	IND MARK MANAGE	none	UNIVERSITY OF SOUTHAMPTON;AUCKLAND UNIVERSITY OF TECHNOLOGY (AUT) BUSINESS SCHOOL;BUSINESS SCHOOL	NOTREPORTED;BUSINESS SCHOOL;NOTREPORTED		GONG Y, 2022, IND MARK MANAGE	GONG Y, 2022, IND MARK MANAGE	CHINA	GONG Y, 2022,	wos
SEDLMEIR J;BARBEREAU T;WEIGL L;ROTH T;HUBER J	CERTIFICATE; DIGITAL WALLET; DISTRIBUTED LEDGER; INNOVATION; PUBLIC KEY INFRASTRUCTURE; VERIFIABLE CREDENTIAL	BLOCKCHAIN; COVID-19; ELECTRONIC DOCUMENT IDENTIFICATION SYSTEMS; INFORMATION SYSTEMS; INFORMATION USE; PUBLIC KEY CRYPTOGRAPHY; CERTIFICATE; DESIGN PRINCIPLES; DIGITAL IDENTITY MANAGEMENT; DIGITAL TRANSFORMATION; DIGITAL WALLETS; INNOVATION; PUBLIC KEY INFRASTRUCTURE; SERVICE PROVIDER; TRANSITION PATHWAY; VERIFIABLE CREDENTIAL; DISTRIBUTED LEDGER	FIM RESEARCH CENTER, BAYREUTH, GERMANY; SNT, UNIVERSITY OF LUXEMBOURG, LUXEMBOURG, LUXEMBOURG; UNIVERSITY OF BAYREUTH, BAYREUTH, GERMANY	INT. CONF. INF. SYST., ICIS: "DIGIT. NEXT GENER."	SOCIETY'S ACCELERATING DIGITAL TRANSFORMATION DURING THE COVID-19 PANDEMIC HIGHLIGHTED CLEARLY THAT THE INTERNET LACKS A SECURE, EFFICIENT, AND PRIVACY-ORIENTED MODEL FOR IDENTITY. SELF-SOVEREIGN IDENTITY (SSI) AIMS TO ADDRESS CORE WEAKNESSES OF SILOED AND FEDERATED APPROACHES TO DIGITAL IDENTITY MANAGEMENT FROM BOTH USERS' AND SERVICE PROVIDERS' PERSPECTIVES. SSI EMERGED AS A NICHE CONCEPT IN LI…				INTERNATIONAL CONFERENCE ON INFORMATION SYSTEMS, ICIS 2022: "DIGITIZATION FOR THE NEXT GENERATION"	ENGLISH	4		ASSOCIATION FOR INFORMATION SYSTEMS	ISI	TRANSITION PATHWAYS TOWARDS DESIGN PRINCIPLES OF SELFSOVEREIGN IDENTITY	CONFERENCE PAPER		2022	SEDLMEIR JOHANNES;BARBEREAU TOM;WEIGL LINDA;ROTH TAMARA;HUBER JASMIN	INT CONF INF SYST, ICIS: "DIGIT NEXT GENER"	none	FIM RESEARCH CENTER;UNIVERSITY OF LUXEMBOURG;UNIVERSITY OF BAYREUTH	FIM RESEARCH CENTER;UNIVERSITY OF LUXEMBOURG;UNIVERSITY OF BAYREUTH		SEDLMEIR J, 2022, INT CONF INF SYST, ICIS: "DIGIT NEXT GENER"	SEDLMEIR J, 2022, INT CONF INF SYST, ICIS: "DIGIT NEXT GENER"	GERMANY	SEDLMEIR J, 2022, INT CONF INF SYST,	wos
RAGHUNANDAN K			METROPOLITAN TRANSIT AUTHORITY, NEW YORK CITY TRANSIT, NEW YORK, NY, UNITED STATES	TEXTB. TELECOMMUN. ENG.	THE CHAPTER PROVIDES A WIDE-RANGING VIEW OF DEVICES THAT ARE WITHIN THE PROXIMITY OF WHERE THE ACTION IS. WHETHER IT IS WILDLIFE CONSERVATION, WHERE WILD ANIMALS HAVE COLLAR, BIRDS HAVE WIRELESS TAGS, HOSPITAL SURGERY AND INTENSIVE CARE UNITS, OTHER MEDICAL APPLICATIONS, POWER OF THE SMART PHONE OR USE OF WIRELESS SENSORS, THE IMPACT IS EVIDENT. THE FOCUS OF THIS CHAPTER IS TO TAKE THE READER THR…	K. RAGHUNANDAN; METROPOLITAN TRANSIT AUTHORITY, NEW YORK CITY TRANSIT, NEW YORK, UNITED STATES; EMAIL: KRISHNARAGHUNANDAN@GMAIL.COM	10.1007/978-3-030-92188-0_10	25244345	TEXTBOOKS IN TELECOMMUNICATIONS ENGINEERING	ENGLISH	0		SPRINGER NATURE	ISI	TRACKING MONITORING AND PROXIMITY USAGE	BOOK CHAPTER	PART F1398	2022	RAGHUNANDAN KRISHNAMURTHY	TEXTB TELECOMMUN ENG	none		NOTREPORTED;NOTREPORTED;NOTREPORTED		RAGHUNANDAN K, 2022, TEXTB TELECOMMUN ENG	RAGHUNANDAN K, 2022, TEXTB TELECOMMUN ENG	USA	RAGHUNANDAN K, 2022,	wos
WIDIANTORO A;HARNADI B	FINTECH; LATENT DIRICHLET ALLOCATION; LDA; OVO; TEXT MINING; TOPIC MODEL	DATA MINING; MODELING LANGUAGES; USER PROFILE; WORD PROCESSING; DATA COLLECTION; HOT TOPICS; LATENT DIRICHLET ALLOCATION; MINING ALGORITHMS; OVO; PYTHON PROGRAMMING LANGUAGE; TEXT-MINING; TOPIC MODELING; TOPIC MODELING ALGORITHMS; POPULATION STATISTICS	SOEGIJAPRANATA CATHOLIC UNIVERSITY, COMPUTER SCIENCE FACULTY, INFORMATION SYSTEMS DEPARTMENT, SEMARANG, INDONESIA	INT. CONF. INF. TECHNOL., INCIT	THE MAIN PURPOSE OF THIS ARTICLE IS TO MODEL THE TOPIC OF OVO FINTECH USER COMMENTS USING LDA. THIS RESEARCH IS A WORD PROCESSING RESEARCH CONDUCTED USING TEXT MINING. THE STATISTICAL POPULATION IS THE COMMENTS OF OVO E-WALLET FINTECH USERS IN 2021 WHO TAKE DATA RANDOMLY. LDA (LATENT DIRICHLET ALLOCATION) AND PYTHON PROGRAMMING LANGUAGE WERE APPLIED TO ANALYZE DATA AND IMPLEMENT TEXT MINING ALGOR…	A.D. WIDIANTORO; SOEGIJAPRANATA CATHOLIC UNIVERSITY, COMPUTER SCIENCE FACULTY, INFORMATION SYSTEMS DEPARTMENT, SEMARANG, INDONESIA; EMAIL: YOGA@UNIKA.AC.ID	10.1109/InCIT56086.2022.10067746		6TH INTERNATIONAL CONFERENCE ON INFORMATION TECHNOLOGY, INCIT 2022	ENGLISH	0		INSTITUTE OF ELECTRICAL AND ELECTRONICS ENGINEERS INC.	ISI	REVIEW OF USER COMMENTS FOR THE OVO FINTECH APPLICATION USING LDA	CONFERENCE PAPER		2022	WIDIANTORO ALBERTUS DWIYOGA;HARNADI BERNARDINUS	INT CONF INF TECHNOL, INCIT	none	SOEGIJAPRANATA CATHOLIC UNIVERSITY	NOTREPORTED;SOEGIJAPRANATA CATHOLIC UNIVERSITY;NOTREPORTED		WIDIANTORO AD, 2022, INT CONF INF TECHNOL, INCIT	WIDIANTORO AD, 2022, INT CONF INF TECHNOL, INCIT	INDONESIA	WIDIANTORO AD, 2022, INT CONF INF TECHNOL,	wos
BOSAMIA M;PATEL D	BITCOIN; BLOCKCHAIN; ETHEREUM; MERKLE HASH TREE; SMART CONTRACT		SMT. CHANDABEN MOHANBHAI PATEL INSTITUTE OF COMPUTER APPLICATIONS, CHAROTAR UNIVERSITY OF SCIENCE AND TECHNOLOGY(CHARUSAT), GUJARAT, INDIA	INT. J. ENG. TRENDS TECHNOL.	THE BLOCKCHAIN HAS HAD A GREATER INTEREST IN RESEARCH AND THE TECHNICAL INDUSTRY REGARDING SECURITY TESTING IN RECENT YEARS. A PARALLEL ENTRY SECURITY TESTING APPROACH USES TIME AND SECURITY FOR SECURITY ENHANCEMENT TESTING. THE FIRST ENTRY TESTS FOR A NORMAL WALLET WITH BASIC SECURITY, WHILE THE OTHER ONE USES AN ETHEREUM WALLET WITH A MERKEL HASH TREE AND SMART CONTRACT. THIS APPROACH IS TESTED…	M. BOSAMIA; SMT. CHANDABEN MOHANBHAI PATEL INSTITUTE OF COMPUTER APPLICATIONS, CHAROTAR UNIVERSITY OF SCIENCE AND TECHNOLOGY(CHARUSAT), GUJARAT, INDIA; EMAIL: MANSIBOSAMIA@GMAIL.COM	10.14445/22315381/IJETT-V70I11P232	23490918	INTERNATIONAL JOURNAL OF ENGINEERING TRENDS AND TECHNOLOGY	ENGLISH	1	11	SEVENTH SENSE RESEARCH GROUP	ISI	AN EXPERIMENT OF A PARALLEL ENTRY SECURITY TESTING APPROACH USING ETHEREUM BLOCKCHAIN	ARTICLE	70	2022	BOSAMIA MANSI;PATEL DHARMENDRA	INT J ENG TRENDS TECHNOL	none	CHAROTAR UNIVERSITY OF SCIENCE AND TECHNOLOGY(CHARUSAT)	NOTREPORTED;CHAROTAR UNIVERSITY OF SCIENCE AND TECHNOLOGY(CHARUSAT);NOTREPORTED		BOSAMIA M, 2022, INT J ENG TRENDS TECHNOL	BOSAMIA M, 2022, INT J ENG TRENDS TECHNOL	INDIA	BOSAMIA M, 2022,	wos
CHALIK F;FATUROHMAN T	CUSTOMER SATISFACTION; E-WALLET; FINANCIAL TECHNOLOGY; INFORMATION SYSTEM SUCCESS MODEL; PARTIAL LEAST SQUARE; TRUST		INSTITUT TEKNOLOGI BANDUNG, INDONESIA	INT. SYMP. ECON. ECONOM. THEORY ECONOM.	E-WALLET IS ONE OF THE FINANCIAL TECHNOLOGY (FINTECH) PRODUCTS. IN INDONESIA, E-WALLET IS STILL IN THE GROWING STAGE. MANY E-WALLET PROVIDERS ARE ATTRACTED TO JOIN THE MARKET EVERY YEAR, AND THE COMPETITION BECOMES TIGHTER, FOCUSING ON CUSTOMER ACQUISITION. PROMOTION IS LAUNCHED, BURNING MUCH CASH IN MAKING THE PROMOTION. HOWEVER, CASH-BURNING DOES NOT GUARANTEE THAT CUSTOMERS WILL USE ONE E-WALL…		10.1108/S1571-038620220000030005	15710386	INTERNATIONAL SYMPOSIA IN ECONOMIC THEORY AND ECONOMETRICS	ENGLISH	7		EMERALD PUBLISHING	ISI	CUSTOMER SATISFACTION OF EWALLET USER AN ADOPTION OF INFORMATION SYSTEM SUCCESS MODEL	BOOK CHAPTER	30	2022	CHALIK FARIQ RAHADIYAN;FATUROHMAN TAUFIK	INT SYMP ECON ECONOM THEORY ECONOM	none	INSTITUT TEKNOLOGI BANDUNG	INSTITUT TEKNOLOGI BANDUNG		CHALIK FR, 2022, INT SYMP ECON ECONOM THEORY ECONOM	CHALIK FR, 2022, INT SYMP ECON ECONOM THEORY ECONOM	INDONESIA	CHALIK FR, 2022,	wos
DARAGMEH A;SALEEM A;BÁRCZI J;SÁGI J	CONTINUOUS INTENTION; E-WALLET ADOPTION; EXPECTATION CONFIRMATION MODEL (ECM); SECURITY; TRUST		DOCTORAL SCHOOL OF ECONOMICS AND REGIONAL STUDIES, HUNGARIAN UNIVERSITY OF AGRICULTURE AND LIFE SCIENCES, GÖDÖLLŐ, HUNGARY; FACULTY OF FINANCE AND ACCOUNTANCY, BUDAPEST BUSINESS SCHOOL, BUDAPEST, HUNGARY	FRONT. PSYCHOL.	E-WALLET IS ONE OF THE LATEST INNOVATIONS IN THE FIELD OF PAYMENTS. HOWEVER, DESPITE NUMEROUS STUDIES ON THE ADOPTION OF E-FINANCE SYSTEMS, THE POST-ADOPTION PHASE IS LARGELY NEGLECTED. IN THIS PAPER, WE USE THE EXTENDED EXPECTATION CONFIRMATION MODEL (ECM) TO ADDRESS THIS GAP BY FOCUSING ON THE STUDY OF CONSUMERS’ CONTINUOUS INTENTIONS REGARDING THE USE OF AN E-WALLET SERVICE. WE CONDUCTED AN EL…	A. DARAGMEH; DOCTORAL SCHOOL OF ECONOMICS AND REGIONAL STUDIES, HUNGARIAN UNIVERSITY OF AGRICULTURE AND LIFE SCIENCES, GÖDÖLLŐ, HUNGARY; EMAIL: DARAGMEH.IUP@GMAIL.COM; J. SÁGI; FACULTY OF FINANCE AND ACCOUNTANCY, BUDAPEST BUSINESS SCHOOL, BUDAPEST, HUNGARY; EMAIL: SAGI.JUDIT@UNI-BGE.HU	10.3389/fpsyg.2022.984931	16641078	FRONTIERS IN PSYCHOLOGY	ENGLISH	6		FRONTIERS MEDIA S.A.	ISI	DRIVERS OF POSTADOPTION OF EWALLET AMONG ACADEMICS IN PALESTINE AN EXTENSION OF THE EXPECTATION CONFIRMATION MODEL	ARTICLE	13	2022	DARAGMEH AHMAD;SALEEM ADIL;BÁRCZI JUDIT;SÁGI JUDIT	FRONT PSYCHOL	none	HUNGARIAN UNIVERSITY OF AGRICULTURE AND LIFE SCIENCES;BUDAPEST BUSINESS SCHOOL	NOTREPORTED;HUNGARIAN UNIVERSITY OF AGRICULTURE AND LIFE SCIENCES;NOTREPORTED;NOTREPORTED;BUDAPEST BUSINESS SCHOOL;NOTREPORTED		DARAGMEH A, 2022, FRONT PSYCHOL	DARAGMEH A, 2022, FRONT PSYCHOL	HUNGARY	DARAGMEH A, 2022,	wos
NA N				PROC. - IEEE INT. CONF. CYBERN. COMPUT. INTELL., CYBERNETICSCOM	THE PROCEEDINGS CONTAIN 91 PAPERS. THE TOPICS DISCUSSED INCLUDE: A COMPARATIVE ANALYSIS OF DEEP LEARNING MODELS FOR DETECTING MALARIA DISEASE THROUGH LBP FEATURES; LANE KEEPING CONTROL USING NONLINEAR MODEL PREDICTIVE CONTROL ON CONSTANT SPEED AUTONOMOUS CAR; ONLINE CUSTOMER REVIEWS AS A MARKETING TOOL TO GENERATE CUSTOMER PURCHASE INTENTION IN ECOMMERCE; USER EXPERIENCE EVALUATION USING INTEGRAT…				PROCEEDINGS - 2022 IEEE INTERNATIONAL CONFERENCE ON CYBERNETICS AND COMPUTATIONAL INTELLIGENCE, CYBERNETICSCOM 2022	ENGLISH	0		INSTITUTE OF ELECTRICAL AND ELECTRONICS ENGINEERS INC.	ISI	PROCEEDINGS 2022 IEEE INTERNATIONAL CONFERENCE ON CYBERNETICS AND COMPUTATIONAL INTELLIGENCE CYBERNETICSCOM 2022	CONFERENCE REVIEW		2022		PROC - IEEE INT CONF CYBERN COMPUT INTELL, CYBERNETICSCOM	none		NOTREPORTED		NA NA, 2022, PROC - IEEE INT CONF CYBERN COMPUT INTELL, CYBERNETICSCOM	NA NA, 2022, PROC - IEEE INT CONF CYBERN COMPUT INTELL, CYBERNETICSCOM		NA NA, 2022, PROC - IEEE INT CONF CYBERN COMPUT INTELL,	wos
VAN E S;ZIMMERMANN K	DIGITALIZATION; E-WALLETS; EU SUCCESSION REGULATION; SELF-SOVEREIGN IDENTITY; STANDARD FORMS; STANDARDIZATION		MAASTRICHT UNIVERSITY, MAASTRICHT, NETHERLANDS; TRENTO UNIVERSITY, TRENTO, ITALY; INTERNATIONAL ASSOCIATION OF LEGAL SCIENCE, PARIS, FRANCE; UNIVERSITY OF GRONINGEN, GRONINGEN, NETHERLANDS	ERA FORUM	THE EUROPEAN CERTIFICATE OF SUCCESSION IS AN OBLIGATORY FORM THAT MAY BE USED IN CROSS-BORDER SUCCESSION CASES. THE FORM STANDARDIZES THE INFORMATION TO BE PROVIDED TO INTERESTED PARTIES. COULD THIS STANDARDIZATION BE FURTHER DEVELOPED THROUGH DIGITALIZATION, AS STANDARDIZATION AND DIGITALIZATION ARE AS CLOSELY CONNECTED AS STANDARDIZATION AND THE USE OF FORMS? COULD AN E-COPY OF THE CERTIFICATE,…	S. VAN ERP; MAASTRICHT UNIVERSITY, MAASTRICHT, NETHERLANDS; EMAIL: SJEF.VANERP@KPNMAIL.NL	10.1007/s12027-022-00716-7	16123093	ERA FORUM	ENGLISH	0	2	SPRINGER SCIENCE AND BUSINESS MEDIA DEUTSCHLAND GMBH	ISI	THE EU SUCCESSION CERTIFICATE FROM STANDARDIZATION TO DIGITALIZATION	ARTICLE	23	2022	VAN ERP SJEF;ZIMMERMANN KATJA	ERA FORUM	none	MAASTRICHT UNIVERSITY;TRENTO UNIVERSITY;INTERNATIONAL ASSOCIATION OF LEGAL SCIENCE;UNIVERSITY OF GRONINGEN	NOTREPORTED;MAASTRICHT UNIVERSITY;NOTREPORTED		VAN ERP S, 2022, ERA FORUM	VAN ERP S, 2022, ERA FORUM	NETHERLANDS	VAN ERP S, 2022,	wos
SUSANTI L;ALAMSYAH D	E-WALLET; MOBILE PAYMENT; PINNING-UP; RESPONSIVENESS; SMARTNESS	ELECTRONIC MONEY; GLOBAL SYSTEM FOR MOBILE COMMUNICATIONS; DATATYPES; E-WALLET; MOBILE PAYMENT; PINNING-UP; QUANTITATIVE DATA; RESEARCH METHOD; RESEARCH SURVEY; RESPONSIVENESS; SMARTNESS; USERS' INTERESTS; SURVEYS	BINA NUSANTARA UNIVERSITY, ENTREPRENEURSHIP DEPARTMENT, JAKARTA, INDONESIA	INT. CONF. ICT FOR SMART SOC.: RECOVER TOGETHER, RECOVER STRONGER SMARTER SMARTIZATION, GOV. COLLAB., ICISS - PROCEEDING	THE SUSTAINABLE OF MOBILE PAYMENT HINGE ON USER'S INTEREST. REGARD TO PROBLEM PHENOMENON, THIS RESEARCH IS DETERMINING THE INTENTION IN MOBILE PAYMENT E-WALLET WHICH IS CHARACTERIZED BY CONTINUOUS USAGE. THE VARIABLES STUDIED INCLUDE RESPONSIVENESS, SMARTNESS, AND RELATIVE ADVANTAGE. THE RESEARCH METHOD USED IN REVIEWING MOBILE PAYMENTS IS A SURVEY, WITH QUANTITATIVE DATA TYPES. RESPONDENTS IN TH…		10.1109/ICISS55894.2022.9915188		9TH INTERNATIONAL CONFERENCE ON ICT FOR SMART SOCIETY: RECOVER TOGETHER, RECOVER STRONGER AND SMARTER SMARTIZATION, GOVERNANCE AND COLLABORATION, ICISS 2022 - PROCEEDING	ENGLISH	3		INSTITUTE OF ELECTRICAL AND ELECTRONICS ENGINEERS INC.	ISI	MODEL OF RELATIVE ADVANTAGE ON MOBILE PAYMENT THE SUPPORT OF RESPONSIVENESS AND SMARTNESS	CONFERENCE PAPER		2022	SUSANTI LENI;ALAMSYAH DONI PURNAMA	INT CONF ICT FOR SMART SOC: RECOVER TOGETHER, RECOVER STRONGER SMARTER SMARTIZATION, GOV COLLAB, ICISS - PROCEEDING	none	BINA NUSANTARA UNIVERSITY	BINA NUSANTARA UNIVERSITY		SUSANTI L, 2022, INT CONF ICT FOR SMART SOC: RECOVER TOGETHER, RECOVER STRONGER SMARTER SMARTIZATION, GOV COLLAB, ICISS - PROCEEDING	SUSANTI L, 2022, INT CONF ICT FOR SMART SOC: RECOVER TOGETHER, RECOVER STRONGER SMARTER SMARTIZATION, GOV COLLAB, ICISS - PROCEEDING	INDONESIA	SUSANTI L, 2022, INT CONF ICT FOR SMART SOC: RECOVER TOGETHER, RECOVER STRONGER SMARTER SMARTIZATION, GOV COLLAB,	wos
UMAMAHESWARI P;ABIRAMASUNDARI S;KAMALADEVI M;DINESH P			SASTRA UNIVERSITY (DEEMED), INDIA; ANJALAI AMMAL MAHALINGAM ENGINEERING COLLEGE, INDIA	HANDB. OF RES. ON COMPUT. VIS. AND IMAGE PROCESS. IN THE DEEP LEARN. ERA	BITCOIN IS A TYPE OF DIGITAL CURRENCY OR COMPUTERIZED MONEY THAT IS UTILISED FOR SPECULATION AROUND THE WORLD. BITCOINS ARE FILES THAT ARE SAVED IN A DIGITAL WALLET PROGRAMME ON A MOBILE PHONE OR A PC. EVERY TRANSACTION AND ITS TIMESTAMP DATA ARE RECORDED IN A COMMON LIST KNOWN AS BLOCKCHAIN. IN THIS RESEARCH, THE COST OF BITCOIN IS ESTIMATED UTILISING DATA MINING TECHNIQUES AND MACHINE LEARNING …		10.4018/978-1-7998-8892-5.ch014		HANDBOOK OF RESEARCH ON COMPUTER VISION AND IMAGE PROCESSING IN THE DEEP LEARNING ERA	ENGLISH	0		IGI GLOBAL	ISI	POTENTIAL MARKETPREDICTIVE FEATURES BASED BITCOIN PRICE PREDICTION USING MACHINE LEARNING ALGORITHMS	BOOK CHAPTER		2022	UMAMAHESWARI P;ABIRAMASUNDARI S;KAMALADEVI M;DINESH P	HANDB OF RES ON COMPUT VIS AND IMAGE PROCESS IN THE DEEP LEARN ERA	none	SASTRA UNIVERSITY (DEEMED);ANJALAI AMMAL MAHALINGAM ENGINEERING COLLEGE	SASTRA UNIVERSITY (DEEMED);ANJALAI AMMAL MAHALINGAM ENGINEERING COLLEGE		UMAMAHESWARI P, 2022, HANDB OF RES ON COMPUT VIS AND IMAGE PROCESS IN THE DEEP LEARN ERA	UMAMAHESWARI P, 2022, HANDB OF RES ON COMPUT VIS AND IMAGE PROCESS IN THE DEEP LEARN ERA	INDIA	UMAMAHESWARI P, 2022,	wos
[truncated: 509 more rows]
